# Supplementary material for: Differential impact of rhamnolipids and TWEEN80 on the composition and functionality of the gut microbiota in the SHIME system.
Source: Research Square preprint supplement (doi:10.21203/rs.3.rs-1340099/v1), 2022-02-11
Supplement: Supplementary file 1 [file 0fa64d452e4f632de8b4e59c.xlsx]

## Sheet: Metadata
Filename	ID	ABC	Timepoint	Emulsifier	EM_Conc	SHIME	Donor
20190411_S2_D2_D3_A07	20190411_S2_D2_D3	A07	2	Control	0	2	1
20190411_S2_D2_D3_A08	20190411_S2_D2_D3	A08	3	Control	0	2	1
20190411_S2_D2_D3_B07	20190411_S2_D2_D3	B07	2	P80	0.05	2	1
20190411_S2_D2_D3_B08	20190411_S2_D2_D3	B08	3	P80	0.05	2	1
20190411_S2_D2_D3_C07	20190411_S2_D2_D3	C07	2	P80	0.5	2	1
20190411_S2_D2_D3_C08	20190411_S2_D2_D3	C08	3	P80	0.5	2	1
20190411_S2_D2_D3_F07	20190411_S2_D2_D3	F07	2	RL	0.05	2	1
20190411_S2_D2_D3_F08	20190411_S2_D2_D3	F08	3	RL	0.05	2	1
20190411_S2_D2_D3_G07	20190411_S2_D2_D3	G07	2	RL	0.5	2	1
20190411_S2_D2_D3_G08	20190411_S2_D2_D3	G08	3	RL	0.5	2	1
20190411_S2_D5_D7_D8_A10	20190411_S2_D5_D7_D8	A10	5	Control	0	2	1
20190411_S2_D5_D7_D8_A11	20190411_S2_D5_D7_D8	A11	7	Control	0	2	1
20190411_S2_D5_D7_D8_A12	20190411_S2_D5_D7_D8	A12	8	Control	0	2	1
20190411_S2_D5_D7_D8_B10	20190411_S2_D5_D7_D8	B10	5	P80	0.05	2	1
20190411_S2_D5_D7_D8_B11	20190411_S2_D5_D7_D8	B11	7	P80	0.05	2	1
20190411_S2_D5_D7_D8_B12	20190411_S2_D5_D7_D8	B12	8	P80	0.05	2	1
20190411_S2_D5_D7_D8_C10	20190411_S2_D5_D7_D8	C10	5	P80	0.5	2	1
20190411_S2_D5_D7_D8_C11	20190411_S2_D5_D7_D8	C11	7	P80	0.5	2	1
20190411_S2_D5_D7_D8_C12	20190411_S2_D5_D7_D8	C12	8	P80	0.5	2	1
20190411_S2_D5_D7_D8_F10	20190411_S2_D5_D7_D8	F10	5	RL	0.05	2	1
20190411_S2_D5_D7_D8_F11	20190411_S2_D5_D7_D8	F11	7	RL	0.05	2	1
20190411_S2_D5_D7_D8_F12	20190411_S2_D5_D7_D8	F12	8	RL	0.05	2	1
20190411_S2_D5_D7_D8_G10	20190411_S2_D5_D7_D8	G10	5	RL	0.5	2	1
20190411_S2_D5_D7_D8_G11	20190411_S2_D5_D7_D8	G11	7	RL	0.5	2	1
20190411_S2_D5_D7_D8_G12	20190411_S2_D5_D7_D8	G12	8	RL	0.5	2	1
20190411_S2_D5_D9_D10_A07	20190411_S2_D5_D9_D10	A07	9	Control	0	2	1
20190411_S2_D5_D9_D10_A08	20190411_S2_D5_D9_D10	A08	10	Control	0	2	1
20190411_S2_D5_D9_D10_B07	20190411_S2_D5_D9_D10	B07	9	P80	0.05	2	1
20190411_S2_D5_D9_D10_B08	20190411_S2_D5_D9_D10	B08	10	P80	0.05	2	1
20190411_S2_D5_D9_D10_C07	20190411_S2_D5_D9_D10	C07	9	P80	0.5	2	1
20190411_S2_D5_D9_D10_C08	20190411_S2_D5_D9_D10	C08	10	P80	0.5	2	1
20190411_S2_D5_D9_D10_F07	20190411_S2_D5_D9_D10	F07	9	RL	0.05	2	1
20190411_S2_D5_D9_D10_F08	20190411_S2_D5_D9_D10	F08	10	RL	0.05	2	1
20190411_S2_D5_D9_D10_G07	20190411_S2_D5_D9_D10	G07	9	RL	0.5	2	1
20190411_S2_D5_D9_D10_G08	20190411_S2_D5_D9_D10	G08	10	RL	0.5	2	1
20190426_S2_D11A_D11B_A08	20190426_S2_D11A_D11B	A08	11	Control	0	2	1
20190426_S2_D11A_D11B_A09	20190426_S2_D11A_D11B	A09	11.5	Control	0	2	1
20190426_S2_D11A_D11B_B08	20190426_S2_D11A_D11B	B08	11	P80	0.05	2	1
20190426_S2_D11A_D11B_B09	20190426_S2_D11A_D11B	B09	11.5	P80	0.05	2	1
20190426_S2_D11A_D11B_C08	20190426_S2_D11A_D11B	C08	11	P80	0.5	2	1
20190426_S2_D11A_D11B_C09	20190426_S2_D11A_D11B	C09	11.5	P80	0.5	2	1
20190426_S2_D11A_D11B_F08	20190426_S2_D11A_D11B	F08	11	RL	0.05	2	1
20190426_S2_D11A_D11B_F09	20190426_S2_D11A_D11B	F09	11.5	RL	0.05	2	1
20190426_S2_D11A_D11B_G08	20190426_S2_D11A_D11B	G08	11	RL	0.5	2	1
20190426_S2_D11A_D11B_G09	20190426_S2_D11A_D11B	G09	11.5	RL	0.5	2	1
20190411_S2_D12_D13_D14_A10_1	20190411_S2_D12_D13_D14	A10_1	12	Control	0	2	1
20190411_S2_D12_D13_D14_A11_1	20190411_S2_D12_D13_D14	A11_1	13	Control	0	2	1
20190411_S2_D12_D13_D14_A12_1	20190411_S2_D12_D13_D14	A12_1	14	Control	0	2	1
20190411_S2_D12_D13_D14_B10_2	20190411_S2_D12_D13_D14	B10_2	12	P80	0.05	2	1
20190411_S2_D12_D13_D14_B11_2	20190411_S2_D12_D13_D14	B11_2	13	P80	0.05	2	1
20190411_S2_D12_D13_D14_B12_2	20190411_S2_D12_D13_D14	B12_2	14	P80	0.05	2	1
20190411_S2_D12_D13_D14_C10_3	20190411_S2_D12_D13_D14	C10_3	12	P80	0.5	2	1
20190411_S2_D12_D13_D14_C12_3	20190411_S2_D12_D13_D14	C12_3	14	P80	0.5	2	1
20190411_S2_D12_D13_D14_D11_3	20190411_S2_D12_D13_D14	D11_3	13	P80	0.5	2	1
20190411_S2_D12_D13_D14_F10_6	20190411_S2_D12_D13_D14	F10_6	12	RL	0.05	2	1
20190411_S2_D12_D13_D14_F11_6	20190411_S2_D12_D13_D14	F11_6	13	RL	0.05	2	1
20190411_S2_D12_D13_D14_F12_6	20190411_S2_D12_D13_D14	F12_6	14	RL	0.05	2	1
20190411_S2_D12_D13_D14_G10_7	20190411_S2_D12_D13_D14	G10_7	12	RL	0.5	2	1
20190411_S2_D12_D13_D14_G11_7	20190411_S2_D12_D13_D14	G11_7	13	RL	0.5	2	1
20190411_S2_D12_D13_D14_G12_7	20190411_S2_D12_D13_D14	G12_7	14	RL	0.5	2	1
20190426_S2_D14_D16_D18_A10	20190426_S2_D14_D16_D18	A10	14	Control	0	2	1
20190426_S2_D14_D16_D18_A11	20190426_S2_D14_D16_D18	A11	16	Control	0	2	1
20190426_S2_D14_D16_D18_A12	20190426_S2_D14_D16_D18	A12	18	Control	0	2	1
20190426_S2_D14_D16_D18_B10	20190426_S2_D14_D16_D18	B10	14	P80	0.05	2	1
20190426_S2_D14_D16_D18_B11	20190426_S2_D14_D16_D18	B11	16	P80	0.05	2	1
20190426_S2_D14_D16_D18_B12	20190426_S2_D14_D16_D18	B12	18	P80	0.05	2	1
20190426_S2_D14_D16_D18_C10	20190426_S2_D14_D16_D18	C10	14	P80	0.5	2	1
20190426_S2_D14_D16_D18_C11	20190426_S2_D14_D16_D18	C11	16	P80	0.5	2	1
20190426_S2_D14_D16_D18_C12	20190426_S2_D14_D16_D18	C12	18	P80	0.5	2	1
20190426_S2_D14_D16_D18_F10	20190426_S2_D14_D16_D18	F10	14	RL	0.05	2	1
20190426_S2_D14_D16_D18_F11	20190426_S2_D14_D16_D18	F11	16	RL	0.05	2	1
20190426_S2_D14_D16_D18_F12	20190426_S2_D14_D16_D18	F12	18	RL	0.05	2	1
20190426_S2_D14_D16_D18_G10	20190426_S2_D14_D16_D18	G10	14	RL	0.5	2	1
20190426_S2_D14_D16_D18_G11	20190426_S2_D14_D16_D18	G11	16	RL	0.5	2	1
20190426_S2_D14_D16_D18_G12	20190426_S2_D14_D16_D18	G12	18	RL	0.5	2	1
20190530-S3-D2-D3_A07	20190530-S3-D2-D3	A07	2	Control	0	3	2
20190530-S3-D2-D3_A08	20190530-S3-D2-D3	A08	3	Control	0	3	2
20190530-S3-D2-D3_B07	20190530-S3-D2-D3	B07	2	P80	0.05	3	2
20190530-S3-D2-D3_B08	20190530-S3-D2-D3	B08	3	P80	0.05	3	2
20190530-S3-D2-D3_C07	20190530-S3-D2-D3	C07	2	P80	0.5	3	2
20190530-S3-D2-D3_C08	20190530-S3-D2-D3	C08	3	P80	0.5	3	2
20190530-S3-D2-D3_F07	20190530-S3-D2-D3	F07	2	RL	0.05	3	2
20190530-S3-D2-D3_F08	20190530-S3-D2-D3	F08	3	RL	0.05	3	2
20190530-S3-D2-D3_G07	20190530-S3-D2-D3	G07	2	RL	0.5	3	2
20190530-S3-D2-D3_G08	20190530-S3-D2-D3	G08	3	RL	0.5	3	2
20190530-S3-D2-D3_H08	20190530-S3-D2-D3	H08	0	Fecal	N	3	2
20190604-S3-D5-D7-D8_A10	20190604-S3-D5-D7-D8	A10	5	Control	0	3	2
20190604-S3-D5-D7-D8_A11	20190604-S3-D5-D7-D8	A11	7	Control	0	3	2
20190604-S3-D5-D7-D8_A12	20190604-S3-D5-D7-D8	A12	8	Control	0	3	2
20190604-S3-D5-D7-D8_B10	20190604-S3-D5-D7-D8	B10	5	P80	0.05	3	2
20190604-S3-D5-D7-D8_B11	20190604-S3-D5-D7-D8	B11	7	P80	0.05	3	2
20190604-S3-D5-D7-D8_B12	20190604-S3-D5-D7-D8	B12	8	P80	0.05	3	2
20190604-S3-D5-D7-D8_C10	20190604-S3-D5-D7-D8	C10	5	P80	0.5	3	2
20190604-S3-D5-D7-D8_C11	20190604-S3-D5-D7-D8	C11	7	P80	0.5	3	2
20190604-S3-D5-D7-D8_C12	20190604-S3-D5-D7-D8	C12	8	P80	0.5	3	2
20190604-S3-D5-D7-D8_F10	20190604-S3-D5-D7-D8	F10	5	RL	0.05	3	2
20190604-S3-D5-D7-D8_F11	20190604-S3-D5-D7-D8	F11	7	RL	0.05	3	2
20190604-S3-D5-D7-D8_F12	20190604-S3-D5-D7-D8	F12	8	RL	0.05	3	2
20190604-S3-D5-D7-D8_G10	20190604-S3-D5-D7-D8	G10	5	RL	0.5	3	2
20190604-S3-D5-D7-D8_G11	20190604-S3-D5-D7-D8	G11	7	RL	0.5	3	2
20190604-S3-D5-D7-D8_G12	20190604-S3-D5-D7-D8	G12	8	RL	0.5	3	2
20190606-S3-D8-D9B-D10_A10	20190606-S3-D8-D9B-D10	A10	8	Control	0	3	2
20190606-S3-D8-D9B-D10_A11	20190606-S3-D8-D9B-D10	A11	9.5	Control	0	3	2
20190606-S3-D8-D9B-D10_A12	20190606-S3-D8-D9B-D10	A12	10	Control	0	3	2
20190606-S3-D8-D9B-D10_B10	20190606-S3-D8-D9B-D10	B10	8	P80	0.05	3	2
20190606-S3-D8-D9B-D10_B11	20190606-S3-D8-D9B-D10	B11	9.5	P80	0.05	3	2
20190606-S3-D8-D9B-D10_B12	20190606-S3-D8-D9B-D10	B12	10	P80	0.05	3	2
20190606-S3-D8-D9B-D10_C10	20190606-S3-D8-D9B-D10	C10	8	P80	0.5	3	2
20190606-S3-D8-D9B-D10_C11	20190606-S3-D8-D9B-D10	C11	9.5	P80	0.5	3	2
20190606-S3-D8-D9B-D10_C12	20190606-S3-D8-D9B-D10	C12	10	P80	0.5	3	2
20190606-S3-D8-D9B-D10_F10	20190606-S3-D8-D9B-D10	F10	8	RL	0.05	3	2
20190606-S3-D8-D9B-D10_F11	20190606-S3-D8-D9B-D10	F11	9.5	RL	0.05	3	2
20190606-S3-D8-D9B-D10_F12	20190606-S3-D8-D9B-D10	F12	10	RL	0.05	3	2
20190606-S3-D8-D9B-D10_G10	20190606-S3-D8-D9B-D10	G10	8	RL	0.5	3	2
20190606-S3-D8-D9B-D10_G11	20190606-S3-D8-D9B-D10	G11	9.5	RL	0.5	3	2
20190606-S3-D8-D9B-D10_G12	20190606-S3-D8-D9B-D10	G12	10	RL	0.5	3	2
20190611-S3-D9A-D11-D12_A10	20190611-S3-D9A-D11-D12	A10	9	Control	0	3	2
20190611-S3-D9A-D11-D12_A11	20190611-S3-D9A-D11-D12	A11	11	Control	0	3	2
20190611-S3-D9A-D11-D12_A12	20190611-S3-D9A-D11-D12	A12	12	Control	0	3	2
20190611-S3-D9A-D11-D12_B10	20190611-S3-D9A-D11-D12	B10	9	P80	0.05	3	2
20190611-S3-D9A-D11-D12_B11	20190611-S3-D9A-D11-D12	B11	11	P80	0.05	3	2
20190611-S3-D9A-D11-D12_B12	20190611-S3-D9A-D11-D12	B12	12	P80	0.05	3	2
20190611-S3-D9A-D11-D12_C10	20190611-S3-D9A-D11-D12	C10	9	P80	0.5	3	2
20190611-S3-D9A-D11-D12_C11	20190611-S3-D9A-D11-D12	C11	11	P80	0.5	3	2
20190611-S3-D9A-D11-D12_C12	20190611-S3-D9A-D11-D12	C12	12	P80	0.5	3	2
20190611-S3-D9A-D11-D12_F10	20190611-S3-D9A-D11-D12	F10	9	RL	0.05	3	2
20190611-S3-D9A-D11-D12_F11	20190611-S3-D9A-D11-D12	F11	11	RL	0.05	3	2
20190611-S3-D9A-D11-D12_F12	20190611-S3-D9A-D11-D12	F12	12	RL	0.05	3	2
20190611-S3-D9A-D11-D12_G10	20190611-S3-D9A-D11-D12	G10	9	RL	0.5	3	2
20190611-S3-D9A-D11-D12_G11	20190611-S3-D9A-D11-D12	G11	11	RL	0.5	3	2
20190611-S3-D9A-D11-D12_G12	20190611-S3-D9A-D11-D12	G12	12	RL	0.5	3	2
20190530-S3-D14-D16_A07	20190530-S3-D14-D16	A07	14	Control	0	3	2
20190530-S3-D14-D16_A08	20190530-S3-D14-D16	A08	16	Control	0	3	2
20190530-S3-D14-D16_B07	20190530-S3-D14-D16	B07	14	P80	0.05	3	2
20190530-S3-D14-D16_B08	20190530-S3-D14-D16	B08	16	P80	0.05	3	2
20190530-S3-D14-D16_C07	20190530-S3-D14-D16	C07	14	P80	0.5	3	2
20190530-S3-D14-D16_C08	20190530-S3-D14-D16	C08	16	P80	0.5	3	2
20190530-S3-D14-D16_F07	20190530-S3-D14-D16	F07	14	RL	0.05	3	2
20190530-S3-D14-D16_F08	20190530-S3-D14-D16	F08	16	RL	0.05	3	2
20190530-S3-D14-D16_G07	20190530-S3-D14-D16	G07	14	RL	0.5	3	2
20190530-S3-D14-D16_G08	20190530-S3-D14-D16	G08	16	RL	0.5	3	2
