# Supplementary material for: Differential impact of rhamnolipids and TWEEN80 on the composition and functionality of the gut microbiota in the SHIME system.
Source: Research Square preprint supplement (doi:10.21203/rs.3.rs-1340099/v1), 2022-02-11
Supplement: Supplementary file 2 [file 1b12e2ac57c49e5f6b438909.xlsx]

## Sheet: Metadata
SampleID	Treatment	EM_Conc	Timepoint (Day)	SHIME	Donor
102	ACN	1	0	0	0
101	ACN	1	0	0	0
100	ACN	1	0	0	0
99	iQC	1	0	0	0
98	iQC	1	0	0	0
96	P80	0.5	11	2	1
95	P80	0.5	12	3	2
94	Control	0	12	2	1
93	P80	0.05	10	3	2
91	P80	0.5	10	3	2
90	RL	0.5	14	2	1
89	Control	0	12	3	2
88	RL	0.05	11	2	1
87	RL	0.5	10	3	2
86	ACN	1	0	0	0
85	iQC	1	0	0	0
84	iQC	1	0	0	0
81	P80	0.05	16	3	2
80	RL	0.05	16	3	2
79	RL	0.05	12	2	1
78	Control	0	10	3	2
77	RL	0.5	12	3	2
75	RL	0.05	2	2	1
74	P80	0.05	9	3	2
73	ACN	1	0	0	0
72	iQC	1	0	0	0
71	iQC	1	0	0	0
70	RL	0.5	11	2	1
68	RL	0.5	12	2	1
66	Fecal sample	0	1	3	2
65	Control	0	16	3	2
64	P80	0.05	12	3	2
63	P80	0.5	12	2	1
62	Control	0	18	2	1
61	P80	0.05	2	3	2
60	ACN	1	0	0	0
59	iQC	1	0	0	0
58	iQC	1	0	0	0
56	RL	0.5	16	3	2
55	RL	0.05	12	3	2
52	RL	0.5	2	2	1
50	RL	0.5	2	3	2
48	P80	0.05	11	2	1
47	ACN	1	0	0	0
46	iQC	1	0	0	0
45	iQC	1	0	0	0
44	Control	0	2	2	1
43	RL	0.5	18	2	1
42	P80	0.5	2	3	2
41	P80	0.5	14	2	1
40	Control	0	11	2	1
39	RL	0.05	9	3	2
38	P80	0.5	2	2	1
36	P80	0.05	2	2	1
34	ACN	1	0	0	0
33	iQC	1	0	0	0
32	iQC	1	0	0	0
31	P80	0.5	16	3	2
30	Control	0	9	3	2
29	P80	0.5	9	3	2
28	P80	0.5	18	2	1
25	P80	0.05	18	2	1
24	Control	0	2	3	2
23	RL	0.05	18	2	1
22	RL	0.05	10	3	2
21	ACN	1	0	0	0
20	iQC	1	0	0	0
19	iQC	1	0	0	0
18	P80	0.05	14	2	1
17	RL	0.05	2	3	2
16	Control	0	14	2	1
15	P80	0.05	12	2	1
14	RL	0.05	14	2	1
10	RL	0.5	9	3	2
8	ACN	1	0	0	0
7	eQC	1	0	0	0
6	eQC	1	0	0	0
5	eQC	1	0	0	0
4	eQC	1	0	0	0
3	ACN	1	0	0	0
2	Standaardmengsel	1	0	0	0
1	ACN	1	0	0	0

## Sheet: Info
Fecal sample (nr 1) was removed from this dataset. BC not in output file from Compound Discoverer
