# Supplementary material for: Differential impact of rhamnolipids and TWEEN80 on the composition and functionality of the gut microbiota in the SHIME system.
Source: Research Square preprint supplement (doi:10.21203/rs.3.rs-1340099/v1), 2022-02-11
Supplement: Supplementary file 3 [file 4495d81fe3908254f47a84b8.xlsx]

## Sheet: Compounds
Checked	Name	Formula	Annotation Source: Predicted Compositions	Annotation Source: ChemSpider Search	FISh Coverage	Molecular Weight	RT [min]	Area (Max.)	# ChemSpider Results	MS2	Area: 200814se102.raw (F1)	Area: 200814se101.raw (F2)	Area: 200814se100.raw (F3)	Area: 200814se099.raw (F4)	Area: 200814se098.raw (F5)	Area: 200814se096.raw (F7)	Area: 200814se095.raw (F8)	Area: 200814se094.raw (F9)	Area: 200814se093.raw (F10)	Area: 200814se091.raw (F12)	Area: 200814se090.raw (F13)	Area: 200814se089.raw (F14)	Area: 200814se088.raw (F15)	Area: 200814se087.raw (F16)	Area: 200814se086.raw (F17)	Area: 200814se085.raw (F18)	Area: 200814se084.raw (F19)	Area: 200814se081.raw (F22)	Area: 200814se080.raw (F23)	Area: 200814se079.raw (F24)	Area: 200814se078.raw (F25)	Area: 200814se077.raw (F26)	Area: 200814se075.raw (F28)	Area: 200814se074.raw (F29)	Area: 200814se073.raw (F30)	Area: 200814se072.raw (F31)	Area: 200814se071.raw (F32)	Area: 200814se070.raw (F33)	Area: 200814se068.raw (F35)	Area: 200814se066.raw (F37)	Area: 200814se065.raw (F38)	Area: 200814se064.raw (F39)	Area: 200814se063.raw (F40)	Area: 200814se062.raw (F41)	Area: 200814se061.raw (F42)	Area: 200814se060.raw (F43)	Area: 200814se059.raw (F44)	Area: 200814se058.raw (F45)	Area: 200814se056.raw (F47)
FALSE	DL-Phenylalanine	C9 H11 N O2	Full match	Full match		165.079	5.058	2.27557e+10	17	No MS2	3.96793e+06	136880	617549	1.4793e+10	1.59801e+10	1.03508e+10	9.47422e+09	3.8105e+09	9.56791e+09	1.3924e+10	2.27557e+10	1.19863e+10	4.96202e+09	1.70099e+10	2.20381e+06	1.40598e+10	1.3501e+10	1.06733e+10	1.30041e+10	8.93085e+09	1.8737e+10	2.06466e+10	2.08269e+10	1.71496e+10	3.74797e+06	1.49972e+10	1.49561e+10	3.37245e+09	1.79215e+10	4.06017e+09	1.24312e+10	9.78134e+09	4.12012e+09	3.93758e+09	1.13239e+10	2.20609e+06	1.44629e+10	1.32688e+10	1.61104e+10
	Checked	Structure	Name	Formula	Molecular Weight	CSID	# References
	FALSE	# ACD/Labs03221914022D 12 12 0 0 0 0 0 0 0 0 1 V2000 0.0000 -0.6634 0.0000 C 0 0 0 0 0 0 0 0 0 0 0 0 0.0000 -1.9903 0.0000 C 0 0 0 0 0 0 0 0 0 0 0 0 1.1541 -2.6607 0.0000 C 0 0 0 0 0 0 0 0 0 0 0 0 2.3013 -1.9903 0.0000 C 0 0 0 0 0 0 0 0 0 0 0 0 2.3013 -0.6634 0.0000 C 0 0 0 0 0 0 0 0 0 0 0 0 1.1541 0.0000 0.0000 C 0 0 0 0 0 0 0 0 0 0 0 0 3.4554 -2.6607 0.0000 C 0 0 0 0 0 0 0 0 0 0 0 0 4.6095 -1.9…	DL-Phenylalanine	C9 H11 N O2	165.079	969	13692
	FALSE	# ACD/Labs04281710392D 12 12 0 0 0 0 0 0 0 0 1 V2000 5.7557 -2.0072 0.0000 O 0 0 0 0 0 0 0 0 0 0 0 0 4.6110 -3.9983 0.0000 O 0 0 0 0 0 0 0 0 0 0 0 0 0.0000 -0.0081 0.0000 N 0 0 0 0 0 0 0 0 0 0 0 0 3.4582 -2.0072 0.0000 C 0 0 0 0 0 0 0 0 0 0 0 0 4.6110 -2.6683 0.0000 C 0 0 0 0 0 0 0 0 0 0 0 0 2.3055 -2.6683 0.0000 C 0 0 0 0 0 0 0 0 0 0 0 0 3.4582 -0.6691 0.0000 C 0 0 0 0 0 0 0 0 0 0 0 0 1.1527 -0.…	Benzocaine	C9 H11 N O2	165.079	13854242	1596
	FALSE	# ACD/Labs06251410112D 13 13 0 0 1 0 0 0 0 0 1 V2000 3.9920 -2.1306 0.0000 N 0 0 0 0 0 0 0 0 0 0 0 0 3.9920 -3.4593 0.0000 C 0 0 0 0 0 0 0 0 0 0 0 0 3.9920 -4.7880 0.0000 H 0 0 0 0 0 0 0 0 0 0 0 0 2.6573 -3.4593 0.0000 C 0 0 0 0 0 0 0 0 0 0 0 0 1.9930 -2.3042 0.0000 C 0 0 0 0 0 0 0 0 0 0 0 0 2.6573 -1.1551 0.0000 C 0 0 0 0 0 0 0 0 0 0 0 0 1.9930 0.0000 0.0000 C 0 0 0 0 0 0 0 0 0 0 0 0 0.6643 0.00…	L-(-)-Phenylalanine	C9 H11 N O2	165.079	5910	935
	FALSE	# ACD/Labs04281710492D 13 13 0 0 1 0 0 0 0 0 1 V2000 3.9920 -2.1306 0.0000 N 0 0 0 0 0 0 0 0 0 0 0 0 3.9920 -3.4593 0.0000 C 0 0 0 0 0 0 0 0 0 0 0 0 3.9920 -4.7880 0.0000 H 0 0 0 0 0 0 0 0 0 0 0 0 2.6573 -3.4593 0.0000 C 0 0 0 0 0 0 0 0 0 0 0 0 1.9930 -2.3042 0.0000 C 0 0 0 0 0 0 0 0 0 0 0 0 2.6573 -1.1551 0.0000 C 0 0 0 0 0 0 0 0 0 0 0 0 1.9930 0.0000 0.0000 C 0 0 0 0 0 0 0 0 0 0 0 0 0.6643 0.00…	D-(+)-Phenylalanine	C9 H11 N O2	165.079	64639	437
	FALSE	# ACD/Labs04281710332D 12 12 0 0 0 0 0 0 0 0 1 V2000 5.9827 -4.6067 0.0000 C 0 0 0 0 0 0 0 0 0 0 0 0 5.3186 -3.4580 0.0000 C 0 0 0 0 0 0 0 0 0 0 0 0 3.9905 -3.4580 0.0000 O 0 0 0 0 0 0 0 0 0 0 0 0 3.3264 -2.3033 0.0000 C 0 0 0 0 0 0 0 0 0 0 0 0 3.9905 -1.1547 0.0000 C 0 0 0 0 0 0 0 0 0 0 0 0 3.3264 0.0000 0.0000 C 0 0 0 0 0 0 0 0 0 0 0 0 1.9922 0.0000 0.0000 C 0 0 0 0 0 0 0 0 0 0 0 0 1.3282 -1.15…	Ethenzamide	C9 H11 N O2	165.079	3167	217
	FALSE	# ACD/Labs04281711072D 12 12 0 0 0 0 0 0 0 0 1 V2000 0.0000 0.0000 0.0000 C 0 0 0 0 0 0 0 0 0 0 0 0 1.1499 -0.6647 0.0000 C 0 0 0 0 0 0 0 0 0 0 0 0 1.1499 -1.9940 0.0000 O 0 0 0 0 0 0 0 0 0 0 0 0 2.2998 -2.6587 0.0000 C 0 0 0 0 0 0 0 0 0 0 0 0 3.4563 -1.9940 0.0000 O 0 0 0 0 0 0 0 0 0 0 0 0 2.2998 -3.9880 0.0000 C 0 0 0 0 0 0 0 0 0 0 0 0 3.4563 -4.6527 0.0000 C 0 0 0 0 0 0 0 0 0 0 0 0 3.4563 -5.9…	2421	C9 H11 N O2	165.079	21106112	214
	FALSE	# ACD/Labs04281710572D 12 12 0 0 0 0 0 0 0 0 1 V2000 3.4583 0.0000 0.0000 O 0 0 0 0 0 0 0 0 0 0 0 0 1.1947 0.0000 0.0000 O 0 0 0 0 0 0 0 0 0 0 0 0 0.0000 -4.6529 0.0000 N 0 0 0 0 0 0 0 0 0 0 0 0 2.3265 -1.9949 0.0000 C 0 0 0 0 0 0 0 0 0 0 0 0 2.3265 -0.6631 0.0000 C 0 0 0 0 0 0 0 0 0 0 0 0 1.1947 -2.6580 0.0000 C 0 0 0 0 0 0 0 0 0 0 0 0 1.1947 -3.9899 0.0000 C 0 0 0 0 0 0 0 0 0 0 0 0 3.5211 -2.65…	Tricaine	C9 H11 N O2	165.079	13860074	159
	FALSE	# ACD/Labs04281711072D 12 12 0 0 0 0 0 0 0 0 1 V2000 1.9967 -4.6079 0.0000 O 0 0 0 0 0 0 0 0 0 0 0 0 2.6577 -3.4582 0.0000 C 0 0 0 0 0 0 0 0 0 0 0 0 3.9888 -3.4582 0.0000 O 0 0 0 0 0 0 0 0 0 0 0 0 4.6544 -2.3039 0.0000 C 0 0 0 0 0 0 0 0 0 0 0 0 1.9967 -2.3039 0.0000 C 0 0 0 0 0 0 0 0 0 0 0 0 2.6577 -1.1543 0.0000 C 0 0 0 0 0 0 0 0 0 0 0 0 1.9967 0.0000 0.0000 C 0 0 0 0 0 0 0 0 0 0 0 0 0.6656 0.00…	Dimethyl anthranilate	C9 H11 N O2	165.079	21108245	153
	FALSE	# ACD/Labs06251410112D 13 13 0 0 1 0 0 0 0 0 1 V2000 3.8114 -2.7924 0.0000 N 0 0 0 0 0 0 0 0 0 0 0 0 2.6600 -3.4545 0.0000 C 0 0 0 0 0 0 0 0 0 0 0 0 1.5085 -4.1223 0.0000 H 0 0 0 0 0 0 0 0 0 0 0 0 1.9921 -2.3030 0.0000 C 0 0 0 0 0 0 0 0 0 0 0 0 2.6600 -1.1515 0.0000 C 0 0 0 0 0 0 0 0 0 0 0 0 1.9921 0.0000 0.0000 C 0 0 0 0 0 0 0 0 0 0 0 0 0.6621 0.0000 0.0000 C 0 0 0 0 0 0 0 0 0 0 0 0 0.0000 -1.15…	(S)-3-phenyl-β-alanine	C9 H11 N O2	165.079	598358	143
	FALSE	# ACD/Labs06251410112D 13 13 0 0 1 0 0 0 0 0 1 V2000 3.8114 -2.7924 0.0000 N 0 0 0 0 0 0 0 0 0 0 0 0 2.6600 -3.4545 0.0000 C 0 0 0 0 0 0 0 0 0 0 0 0 1.5085 -4.1223 0.0000 H 0 0 0 0 0 0 0 0 0 0 0 0 3.3221 -4.6060 0.0000 C 0 0 0 0 0 0 0 0 0 0 0 0 4.6520 -4.6060 0.0000 C 0 0 0 0 0 0 0 0 0 0 0 0 5.3199 -5.7575 0.0000 O 0 0 0 0 0 0 0 0 0 0 0 0 5.3199 -3.4545 0.0000 O 0 0 0 0 0 0 0 0 0 0 0 0 1.9921 -2.…	2087717	C9 H11 N O2	165.079	598357	140
	FALSE	MolHeader ELEMENTL06251706352D Dotmatics Elemental 12 12 0 0 0 0 999 V2000 -1.9659 5.8580 0.0000 C 0 0 0 0 0 -3.1177 5.1930 0.0000 C 0 0 0 0 0 -3.1177 3.8630 0.0000 C 0 0 0 0 0 -1.9659 3.1980 0.0000 C 0 0 0 0 0 -0.8141 3.8630 0.0000 C 0 0 0 0 0 -0.8141 5.1930 0.0000 C 0 0 0 0 0 0.3377 3.1980 0.0000 C 0 0 0 0 0 -4.2695 3.1980 0.0000 O 0 0 0 0 0 -5.4213 3.8630 0.0000 C 0 0 0 0 0 -6.5732 3.1980 0.00…	metolcarb	C9 H11 N O2	165.079	13684	130
	FALSE	# ACD/Labs04281711142D 12 12 0 0 0 0 0 0 0 0 1 V2000 3.4814 0.0000 0.0000 O 0 0 0 0 0 0 0 0 0 0 0 0 8.0775 -1.3247 0.0000 O 0 0 0 0 0 0 0 0 0 0 0 0 0.0000 -1.9871 0.0000 N 0 0 0 0 0 0 0 0 0 0 0 0 2.3021 -1.9871 0.0000 C 0 0 0 0 0 0 0 0 0 0 0 0 3.4733 -1.3247 0.0000 C 0 0 0 0 0 0 0 0 0 0 0 0 1.1470 -1.3247 0.0000 C 0 0 0 0 0 0 0 0 0 0 0 0 2.3021 -3.3199 0.0000 C 0 0 0 0 0 0 0 0 0 0 0 0 4.6284 -1.9…	4-hydroxy-1-(3-pyridyl)-1-butanone	C9 H11 N O2	165.079	96966	106
	FALSE	#409140 -OEChem-02070708252D 23 23 0 0 0 0 0 0 0999 V2000 3.7321 0.3450 0.0000 O 0 0 0 0 0 0 0 0 0 0 0 0 2.8660 1.8450 0.0000 O 0 0 0 0 0 0 0 0 0 0 0 0 4.5981 2.8450 0.0000 N 0 0 0 0 0 0 0 0 0 0 0 0 2.8660 -1.1550 0.0000 C 0 0 0 0 0 0 0 0 0 0 0 0 2.8660 -0.1550 0.0000 C 0 0 0 0 0 0 0 0 0 0 0 0 3.7321 -1.6550 0.0000 C 0 0 0 0 0 0 0 0 0 0 0 0 2.0000 -1.6550 0.0000 C 0 0 0 0 0 0 0 0 0 0 0 0 3.7321 -…	Benzyl glycinate	C9 H11 N O2	165.079	362041	92
	FALSE	# ACD/Labs04281711212D 23 24 0 0 0 0 0 0 0 0 1 V2000 0.0000 -0.9893 0.0000 O 0 0 0 0 0 0 0 0 0 0 0 0 0.0000 -4.1726 0.0000 O 0 0 0 0 0 0 0 0 0 0 0 0 7.0048 -3.4147 0.0000 N 0 0 0 0 0 0 0 0 0 0 0 0 5.5608 -0.9334 0.0000 C 0 0 0 0 0 0 0 0 0 0 0 0 4.1407 -1.7871 0.0000 C 0 0 0 0 0 0 0 0 0 0 0 0 4.1407 -3.3748 0.0000 C 0 0 0 0 0 0 0 0 0 0 0 0 7.0048 -1.7552 0.0000 C 0 0 0 0 0 0 0 0 0 0 0 0 5.5608 -4.…	Norsalsolinol	C9 H11 N O2	165.079	33891	84
	FALSE	#114 -OEChem-02070708192D 23 23 0 0 0 0 0 0 0999 V2000 2.0000 2.1900 0.0000 O 0 0 0 0 0 0 0 0 0 0 0 0 3.7321 2.1900 0.0000 O 0 0 0 0 0 0 0 0 0 0 0 0 5.4641 -2.8100 0.0000 N 0 0 0 0 0 0 0 0 0 0 0 0 3.7321 0.1900 0.0000 C 0 0 0 0 0 0 0 0 0 0 0 0 3.7321 -0.8100 0.0000 C 0 0 0 0 0 0 0 0 0 0 0 0 2.8660 0.6900 0.0000 C 0 0 0 0 0 0 0 0 0 0 0 0 4.5981 -1.3100 0.0000 C 0 0 0 0 0 0 0 0 0 0 0 0 5.4641 -0.81…	4-(3-Pyridinyl)butanoic acid	C9 H11 N O2	165.079	112	41
	FALSE	# ACD/Labs04221415492D 12 13 0 0 0 0 0 0 0 0 1 V2000 4.6606 -2.1410 0.0000 O 0 0 0 0 0 0 0 0 0 0 0 0 6.8842 -1.2942 0.0000 O 0 0 0 0 0 0 0 0 0 0 0 0 1.1565 -4.2544 0.0000 N 0 0 0 0 0 0 0 0 0 0 0 0 3.4490 -1.5971 0.0000 C 0 0 0 0 0 0 0 0 0 0 0 0 2.2993 -2.2580 0.0000 C 0 0 0 0 0 0 0 0 0 0 0 0 5.5555 -1.1565 0.0000 C 0 0 0 0 0 0 0 0 0 0 0 0 3.5866 -0.2754 0.0000 C 0 0 0 0 0 0 0 0 0 0 0 0 4.8878 0.0…	5-(3-Pyridinyl)tetrahydro-2-furanol	C9 H11 N O2	165.079	156351	19
	FALSE	#5317559 -OEChem-02070710142D 23 24 0 1 0 0 0 0 0999 V2000 2.0000 0.1377 0.0000 O 0 0 0 0 0 0 0 0 0 0 0 0 2.8660 -1.3623 0.0000 O 0 0 0 0 0 0 0 0 0 0 0 0 5.5321 0.1169 0.0000 N 0 0 0 0 0 0 0 0 0 0 0 0 3.7321 0.1377 0.0000 C 0 0 0 0 0 0 0 0 0 0 0 0 3.7321 1.1377 0.0000 C 0 0 0 0 0 0 0 0 0 0 0 0 2.8660 1.6377 0.0000 C 0 0 0 0 0 0 0 0 0 0 0 0 2.8660 -0.3623 0.0000 C 0 0 3 0 0 0 0 0 0 0 0 0 2.0000 1.…	8-Methyl-3,4-dihydro-1H-pyrano[3,4-c]pyridin-1-ol	C9 H11 N O2	165.079	4476406	10
FALSE		C22 H42 N2 O	Full match	No results		350.329	12.25	1.78417e+10	0	No MS2	208656	12997.9	216643	1.63879e+09	1.92629e+09	1.10164e+07	5.54606e+06	8.62293e+06	6.72798e+06	1.71955e+07	1.78417e+10	8.64147e+06	1.62197e+07	1.10659e+10	7.84286e+06	9.74995e+08	8.21016e+08	8.96443e+06	1.0645e+09	3.49192e+08	2.27391e+07	1.58645e+10	5.20069e+06	6.04667e+06	1.12045e+07	1.79891e+09	1.48411e+09	9.33092e+06	1.0722e+10	3.49539e+06	3.96214e+06	2.0923e+06	3.01152e+06	6.87467e+06	5.46403e+06	9.57836e+06	1.53648e+09	1.37747e+09	1.31227e+10
	Checked	Structure	Name	Formula	Molecular Weight	CSID	# References
FALSE			No results	No results		155.113	12.014	1.63893e+10	0	No MS2	1.72996e+06	107477	1.79138e+06	7.56045e+07	1.43913e+08	1.63209e+08	2.02676e+08	3.51873e+08	3.48665e+08	3.03093e+08	1.22959e+08	2.57818e+08	2.52767e+08	3.07717e+08	2.18139e+08	1.78669e+08	1.59671e+08	1.16601e+08	2.11708e+08	1.97771e+08	1.88147e+08	1.28721e+08	1.75069e+08	2.57944e+08	2.30666e+08	3.079e+08	7.33882e+07	1.53867e+08	1.08147e+08	1.77958e+08	3.32149e+08	2.73869e+08	3.62148e+08	2.75303e+08	4.11013e+08	2.01662e+08	2.98824e+08	2.52455e+08	6.26933e+07
	Checked	Structure	Name	Formula	Molecular Weight	CSID	# References
FALSE			No results	No results		140.951	9.806	1.48991e+10	0	No MS2	2.46124e+06	116383	1.48991e+10	2.59752e+06	2.62234e+06	2.69985e+06	4.60888e+06	7.4749e+06	4.73261e+06	5.62943e+06	2.62226e+06	1.48864e+06	1.86755e+06	7.75773e+06	9.68803e+06	7.35441e+06	5.60878e+06	9.08327e+06	2.35804e+06	5.90392e+06	6.40172e+06	2.19555e+06	8.36332e+06	2.0279e+06	1.05795e+07	7.23767e+06	8.44449e+06	8.6511e+06	2.99185e+06	6.82819e+06	2.30544e+06	4.94241e+06	4.93702e+06	9.39719e+06	8.07164e+06	1.03676e+07	8.06203e+06	8.8787e+06	2.04294e+06
	Checked	Structure	Name	Formula	Molecular Weight	CSID	# References
FALSE	N-Methylpyrrolidone	C5 H9 N O	Full match	Full match		99.0687	5.102	1.45916e+10	5	No MS2	4.1735e+06	96776	97220.5	3.25514e+09	2.98109e+09	5.17021e+09	3.64084e+09	5.06001e+09	2.81867e+09	4.98851e+09	5.54421e+08	1.69415e+09	6.39727e+09	4.0956e+08	9.66518e+06	2.7568e+09	2.46586e+09	3.36867e+09	2.12906e+09	4.26581e+09	1.47164e+09	8.30983e+07	1.8316e+09	2.21768e+09	1.05477e+07	3.02508e+09	2.92882e+09	6.14986e+09	2.57136e+09	1.10534e+08	3.30495e+09	4.30362e+09	6.26689e+09	6.39819e+09	7.85282e+08	1.18223e+07	2.73438e+09	2.76524e+09	2.0753e+07
	Checked	Structure	Name	Formula	Molecular Weight	CSID	# References
	FALSE	# ACD/Labs03221913572D 7 7 0 0 0 0 0 0 0 0 1 V2000 1.0694 -3.3757 0.0000 C 0 0 0 0 0 0 0 0 0 0 0 0 1.0728 -2.0466 0.0000 N 0 0 0 0 0 0 0 0 0 0 0 0 0.0000 -1.2676 0.0000 C 0 0 0 0 0 0 0 0 0 0 0 0 0.4066 0.0000 0.0000 C 0 0 0 0 0 0 0 0 0 0 0 0 1.7357 0.0000 0.0000 C 0 0 0 0 0 0 0 0 0 0 0 0 2.1525 -1.2676 0.0000 C 0 0 0 0 0 0 0 0 0 0 0 0 3.4167 -1.6776 0.0000 O 0 0 0 0 0 0 0 0 0 0 0 0 1 2 1 0 0 0 0 …	N-Methylpyrrolidone	C5 H9 N O	99.0684	12814	731
	FALSE	# ACD/Labs03221913572D 7 7 0 0 0 0 0 0 0 0 1 V2000 1.1509 0.0000 0.0000 C 0 0 0 0 0 0 0 0 0 0 0 0 0.0000 -0.6636 0.0000 C 0 0 0 0 0 0 0 0 0 0 0 0 0.0000 -1.9943 0.0000 C 0 0 0 0 0 0 0 0 0 0 0 0 1.1509 -2.6579 0.0000 N 0 0 0 0 0 0 0 0 0 0 0 0 2.3053 -1.9943 0.0000 C 0 0 0 0 0 0 0 0 0 0 0 0 2.3053 -0.6636 0.0000 C 0 0 0 0 0 0 0 0 0 0 0 0 3.4563 -2.6579 0.0000 O 0 0 0 0 0 0 0 0 0 0 0 0 1 2 1 0 0 0 0…	TO0110000	C5 H9 N O	99.0684	12144	251
	FALSE	# ACD/Labs04281711282D 7 7 0 0 0 0 0 0 0 0 1 V2000 2.9771 -3.6937 0.0000 O 0 0 0 0 0 0 0 0 0 0 0 0 1.6769 -3.4167 0.0000 C 0 0 0 0 0 0 0 0 0 0 0 0 1.2669 -2.1534 0.0000 N 0 0 0 0 0 0 0 0 0 0 0 0 2.0463 -1.0749 0.0000 C 0 0 0 0 0 0 0 0 0 0 0 0 1.2669 0.0000 0.0000 C 0 0 0 0 0 0 0 0 0 0 0 0 0.0000 -0.4100 0.0000 C 0 0 0 0 0 0 0 0 0 0 0 0 0.0000 -1.7397 0.0000 C 0 0 0 0 0 0 0 0 0 0 0 0 1 2 2 0 0 0 0…	106540	C5 H9 N O	99.0684	69787	87
	FALSE	# ACD/Labs04281712452D 7 6 0 0 1 0 0 0 0 0 1 V2000 3.2461 -1.6039 0.0000 O 0 0 0 0 0 0 0 0 0 0 0 0 4.7877 0.0000 0.0000 N 0 0 0 0 0 0 0 0 0 0 0 0 2.3029 -0.6607 0.0000 C 0 0 0 0 0 0 0 0 0 0 0 0 3.4567 0.0000 0.0000 C 0 0 0 0 0 0 0 0 0 0 0 0 1.1538 0.0000 0.0000 C 0 0 0 0 0 0 0 0 0 0 0 0 1.3645 -1.6039 0.0000 C 0 0 0 0 0 0 0 0 0 0 0 0 0.0000 -0.6607 0.0000 C 0 0 0 0 0 0 0 0 0 0 0 0 1 3 1 0 0 0 0 2…	(R)-2-hydroxy-2-methylbutyronitrile	C5 H9 N O	99.0684	26332035	22
	FALSE	#53654 -OEChem-02070708202D 16 16 0 1 0 0 0 0 0999 V2000 4.2601 0.7694 0.0000 O 0 0 0 0 0 0 0 0 0 0 0 0 3.7601 -0.7694 0.0000 N 0 0 0 0 0 0 0 0 0 0 0 0 4.5691 -0.1816 0.0000 C 0 0 3 0 0 0 0 0 0 0 0 0 3.2601 0.7694 0.0000 C 0 0 0 0 0 0 0 0 0 0 0 0 2.9511 -0.1816 0.0000 C 0 0 0 0 0 0 0 0 0 0 0 0 5.5201 -0.4907 0.0000 C 0 0 0 0 0 0 0 0 0 0 0 0 2.0000 -0.4907 0.0000 C 0 0 0 0 0 0 0 0 0 0 0 0 4.6661 -…	2,4-DIMETHYL-3-OXAZOLINE	C5 H9 N O	99.0684	48440	16
FALSE		C20 H40 N2 O	Full match	No results		324.313	12.091	1.07839e+10	0	No MS2	174482	12903.8	170774	1.10663e+09	1.16751e+09	7.12652e+06	2.9791e+07	5.11177e+06	5.01563e+06	2.95465e+07	1.07839e+10	4.63996e+06	1.19305e+07	6.79443e+09	5.73768e+06	9.57715e+08	7.07472e+08	7.99363e+06	7.55349e+08	2.26563e+08	1.3656e+07	8.79989e+09	3.98405e+06	4.06728e+06	1.18176e+07	1.08246e+09	1.02655e+09	5.08671e+06	8.04408e+09	2.17382e+06	3.52571e+06	1.99586e+06	3.77761e+06	4.16273e+06	4.04407e+06	5.19049e+06	1.01948e+09	1.11786e+09	8.37899e+09
	Checked	Structure	Name	Formula	Molecular Weight	CSID	# References
FALSE		C20 H42 N2 O	Full match	No results		326.329	12.44	9.93879e+09	0	No MS2	229072	12764.4	158687	1.02931e+09	8.72507e+08	7.43559e+06	9.49192e+06	5.31905e+06	4.32227e+06	4.61118e+07	9.93879e+09	6.17558e+06	2.47754e+07	6.23498e+09	6.88505e+06	7.26175e+08	4.73943e+08	7.02496e+06	5.68246e+08	1.73771e+08	2.70078e+07	8.73388e+09	3.6846e+06	4.63063e+06	1.11256e+07	8.49418e+08	7.79327e+08	7.93712e+06	6.38636e+09	2.11591e+06	2.71574e+06	1.77034e+06	2.64405e+06	5.54809e+06	5.01331e+06	9.18689e+06	8.94421e+08	8.54426e+08	8.61703e+09
	Checked	Structure	Name	Formula	Molecular Weight	CSID	# References
FALSE			No results	No results		188.14	11.795	9.65146e+09	0	No MS2	265837	26917.2	311502	1.9198e+09	2.03535e+09	5.70535e+06	2.49079e+06	3.31057e+06	3.35167e+06	1.13544e+07	9.65146e+09	4.58828e+06	5.21702e+06	5.8752e+09	663523	1.30279e+09	1.18646e+09	5.32098e+06	2.14988e+09	1.37929e+09	7.25454e+06	8.75856e+09	2.22841e+06	5.48745e+06	545425	1.87745e+09	1.76128e+09	5.02763e+06	8.65419e+09	1.02731e+06	7.16103e+06	3.15927e+06	2.96099e+06	4.05917e+06	2.34184e+06	817301	1.69058e+09	1.80031e+09	7.7098e+09
	Checked	Structure	Name	Formula	Molecular Weight	CSID	# References
FALSE	Creatinine	C4 H7 N3 O	Full match	Full match		113.059	1.039	9.48823e+09	2	No MS2	11650.6	11087.4	12999.8	3.42991e+09	3.20821e+09	8.27717e+07	8.49336e+07	7.69577e+07	9.0202e+07	4.57032e+08	6.83627e+07	3.39106e+08	4.28698e+08	9.7494e+07	1.87219e+06	7.08036e+07	6.14024e+07	9.18823e+07	7.6787e+07	7.58628e+08	9.80275e+07	9.40201e+07	5.19775e+09	8.27987e+07	2.30845e+06	8.93406e+07	9.20359e+07	3.13131e+08	9.48823e+09	1.20754e+09	1.0147e+08	7.11849e+07	7.8145e+07	9.86246e+07	2.88591e+07	290482	7.58339e+07	3.27507e+09	6.59473e+07
	Checked	Structure	Name	Formula	Molecular Weight	CSID	# References
	FALSE	# ACD/Labs03221914022D 8 8 0 0 0 0 0 0 0 0 1 V2000 1.1731 0.0000 0.0000 C 0 0 0 0 0 0 0 0 0 0 0 0 1.8388 -1.1545 0.0000 N 0 0 0 0 0 0 0 0 0 0 0 0 3.1608 -1.3034 0.0000 C 0 0 0 0 0 0 0 0 0 0 0 0 3.4401 -2.5975 0.0000 C 0 0 0 0 0 0 0 0 0 0 0 0 2.2857 -3.2632 0.0000 N 0 0 0 0 0 0 0 0 0 0 0 0 1.3034 -2.3741 0.0000 C 0 0 0 0 0 0 0 0 0 0 0 0 0.0000 -2.6581 0.0000 N 0 0 0 0 0 0 0 0 0 0 0 0 4.6551 -3.137…	Creatinine	C4 H7 N3 O	113.059	568	38613
	FALSE	# ACD/Labs04221415492D 8 7 0 0 0 0 0 0 0 0 1 V2000 2.3197 0.0000 0.0000 O 0 0 0 0 0 0 0 0 0 0 0 0 1.1598 -2.0096 0.0000 N 0 0 0 0 0 0 0 0 0 0 0 0 1.1598 -0.6718 0.0000 N 0 0 0 0 0 0 0 0 0 0 0 0 5.7417 -2.0153 0.0000 N 0 0 0 0 0 0 0 0 0 0 0 0 2.3197 -2.6814 0.0000 C 0 0 0 0 0 0 0 0 0 0 0 0 3.4623 -2.0211 0.0000 C 0 0 0 0 0 0 0 0 0 0 0 0 0.0000 -2.6814 0.0000 C 0 0 0 0 0 0 0 0 0 0 0 0 4.5991 -2.675…	3-(METHYLNITROSAMINO)PROPIONITRILE	C4 H7 N3 O	113.059	55991	41
FALSE		C20 H38 N2 O	Full match	No results		322.298	11.794	9.17458e+09	0	No MS2	195875	11872	181591	8.77021e+08	7.21597e+08	4.57115e+06	1.60903e+06	3.37096e+06	2.65349e+06	7.46062e+06	9.17458e+09	3.64894e+06	7.10486e+06	6.82655e+09	3.33143e+06	6.27009e+08	5.96141e+08	3.17354e+06	6.46505e+08	1.71007e+08	7.91549e+06	8.16986e+09	2.23924e+06	2.6328e+06	3.90646e+06	7.70577e+08	7.62555e+08	3.6161e+06	6.55501e+09	1.66716e+06	2.22769e+06	1.08789e+06	1.06168e+06	3.27954e+06	2.87994e+06	3.5414e+06	7.80723e+08	7.94603e+08	8.53692e+09
	Checked	Structure	Name	Formula	Molecular Weight	CSID	# References
FALSE			No results	No results		90.0301	1.512	8.95682e+09	0	No MS2	33004.9	53974.2	293375	2.62455e+09	3.38546e+09	1.4974e+07	9.73411e+06	7.0931e+06	1.43433e+07	9.19231e+07	1.15484e+09	5.19353e+07	9.39263e+06	3.73926e+07	4.82897e+06	2.07721e+09	1.94478e+09	9.18663e+06	1.69577e+07	1.18893e+07	3.16353e+07	1.64483e+08	4.60291e+09	2.59097e+07	5.40078e+06	2.85692e+09	2.55751e+09	1.47638e+07	3.97793e+08	6.90006e+07	1.18688e+07	6.10091e+06	1.23555e+07	1.14164e+07	1.41127e+08	6.32409e+06	2.20554e+09	2.21153e+09	2.3261e+08
	Checked	Structure	Name	Formula	Molecular Weight	CSID	# References
FALSE		C3 H2 O9	Full match	No results		181.97	6.779	8.14261e+09	0	No MS2	2.93962e+06	88025.7	369943	2.0146e+07	2.20812e+07	1.17754e+06	710691	777276	687487	878952	1.09448e+06	746972	948911	861357	690612	1.51606e+07	1.34669e+07	823878	887737	820413	1.0198e+06	1.08217e+06	8.10623e+07	872758	734939	2.05464e+07	1.75069e+07	880581	1.0898e+06	8.14261e+09	903660	708843	838747	1.1158e+06	3.18941e+08	710684	1.81167e+07	1.70946e+07	952012
	Checked	Structure	Name	Formula	Molecular Weight	CSID	# References
FALSE		C22 H44 N2 O	Full match	No results		352.345	12.624	6.78733e+09	0	No MS2	165576	13205.7	168137	6.12153e+08	5.96765e+08	4.12942e+06	2.84884e+07	3.01144e+06	2.34759e+06	1.90831e+07	6.78733e+09	2.89858e+06	6.03292e+06	3.97323e+09	2.65498e+06	3.82219e+08	2.9325e+08	3.75153e+06	2.9391e+08	1.11856e+08	7.97789e+06	6.149e+09	1.8986e+06	2.2224e+06	3.9463e+06	5.66228e+08	5.08992e+08	3.49885e+06	3.91269e+09	1.54308e+06	1.83108e+06	1.72987e+06	3.64822e+06	2.93839e+06	2.22883e+06	3.33296e+06	5.67607e+08	4.53868e+08	5.72916e+09
	Checked	Structure	Name	Formula	Molecular Weight	CSID	# References
FALSE	N-Acetylcadaverine	C7 H16 N2 O	Full match	Full match		144.126	1.504	6.0944e+09	2	No MS2	15886	17963.9	17628.3	2.87132e+09	2.17432e+09	2.27087e+09	6.12605e+08	4.49516e+09	9.74572e+08	2.0726e+09	7.26257e+08	1.32087e+09	3.46193e+09	4.16004e+08	192589	2.00216e+09	1.503e+09	5.89476e+08	3.60741e+08	2.39938e+09	1.30589e+09	2.06787e+08	1.78146e+09	1.17281e+09	284778	2.63917e+09	1.90564e+09	2.91916e+09	2.95562e+09	3.32054e+07	1.62496e+09	8.43864e+08	1.38131e+09	4.45395e+09	9.51006e+08	157555	2.34238e+09	2.93344e+09	6.52623e+08
	Checked	Structure	Name	Formula	Molecular Weight	CSID	# References
	FALSE	#189087 -OEChem-02070708192D 26 25 0 0 0 0 0 0 0999 V2000 8.5991 1.0600 0.0000 O 0 0 0 0 0 0 0 0 0 0 0 0 7.7331 -0.4400 0.0000 N 0 0 0 0 0 0 0 0 0 0 0 0 2.5369 -0.4400 0.0000 N 0 0 0 0 0 0 0 0 0 0 0 0 5.1350 0.0600 0.0000 C 0 0 0 0 0 0 0 0 0 0 0 0 6.0010 -0.4400 0.0000 C 0 0 0 0 0 0 0 0 0 0 0 0 4.2690 -0.4400 0.0000 C 0 0 0 0 0 0 0 0 0 0 0 0 6.8671 0.0600 0.0000 C 0 0 0 0 0 0 0 0 0 0 0 0 3.4030 0…	N-Acetylcadaverine	C7 H16 N2 O	144.126	164295	65
	FALSE	# ACD/Labs04111411492D 10 9 0 0 0 0 0 0 0 0 1 V2000 0.0000 -0.6640 0.0000 N 0 0 0 0 0 0 0 0 0 0 0 0 1.1527 0.0000 0.0000 C 0 0 0 0 0 0 0 0 0 0 0 0 2.3054 -0.6640 0.0000 C 0 0 0 0 0 0 0 0 0 0 0 0 3.4581 0.0000 0.0000 C 0 0 0 0 0 0 0 0 0 0 0 0 4.6016 -0.6640 0.0000 N 0 0 0 0 0 0 0 0 0 0 0 0 5.7636 0.0000 0.0000 C 0 0 0 0 0 0 0 0 0 0 0 0 6.9163 -0.6640 0.0000 C 0 0 0 0 0 0 0 0 0 0 0 0 8.0690 0.0000 …	4-[(3-Aminopropyl)amino]butanal	C7 H16 N2 O	144.126	14496796	16
FALSE			No results	No results		155.113	11.663	6.04029e+09	0	No MS2	2.70491e+06	151009	2.85584e+06	1.86912e+08	8.72903e+07	1.87583e+08	2.43271e+08	3.2683e+07	3.50167e+08	3.22016e+08	5.75151e+07	1.60871e+08	4.2374e+07	2.01342e+08	1.42802e+07	7.51618e+07	2.50223e+08	1.1683e+07	1.36246e+08	2.98151e+08	1.854e+08	5.47637e+07	2.48803e+08	4.6195e+07	1.37948e+08	2.19001e+07	1.81009e+08	8.85228e+07	4.50359e+07	2.64772e+08	2.12083e+07	3.74495e+07	1.64175e+08	1.44421e+07	2.13312e+08	7.79592e+07	1.4449e+08	1.50273e+07	2.30769e+08
	Checked	Structure	Name	Formula	Molecular Weight	CSID	# References
FALSE	Oryzalin metabolite	C6 H14 N2 O	Full match	Full match		130.111	1.162	5.35616e+09	2	No MS2	30777.9	31486.8	36997.1	1.59131e+09	1.45328e+09	2.10094e+09	1.09519e+09	2.68929e+09	1.78993e+09	5.35616e+09	3.41885e+08	1.72993e+09	2.79141e+09	6.62869e+08	1.39676e+06	1.35831e+09	1.15328e+09	1.13447e+09	2.553e+08	1.30397e+09	1.83916e+09	2.3383e+08	7.62069e+08	1.72233e+09	1.4343e+06	1.51812e+09	1.58958e+09	2.08485e+09	1.72097e+09	1.38209e+07	2.43647e+09	1.60124e+09	1.104e+09	2.3581e+09	8.56861e+08	1.54313e+06	1.44429e+09	1.4568e+09	2.61637e+08
	Checked	Structure	Name	Formula	Molecular Weight	CSID	# References
	FALSE	# ACD/Labs04281711282D 9 8 0 0 0 0 0 0 0 0 1 V2000 4.6105 0.0000 0.0000 O 0 0 0 0 0 0 0 0 0 0 0 0 3.4459 -2.0124 0.0000 N 0 0 0 0 0 0 0 0 0 0 0 0 3.4459 -0.6685 0.0000 N 0 0 0 0 0 0 0 0 0 0 0 0 4.6105 -2.6809 0.0000 C 0 0 0 0 0 0 0 0 0 0 0 0 2.2812 -2.6809 0.0000 C 0 0 0 0 0 0 0 0 0 0 0 0 1.1371 -2.0193 0.0000 C 0 0 0 0 0 0 0 0 0 0 0 0 5.7546 -2.0193 0.0000 C 0 0 0 0 0 0 0 0 0 0 0 0 0.0000 -2.674…	Oryzalin metabolite	C6 H14 N2 O	130.111	11632	260
	FALSE	# ACD/Labs06251410062D 9 8 0 0 0 0 0 0 0 0 1 V2000 0.0000 -6.9183 0.0000 C 0 0 0 0 0 0 0 0 0 0 0 0 1.3320 -6.9183 0.0000 C 0 0 0 0 0 0 0 0 0 0 0 0 1.9939 -8.0727 0.0000 O 0 0 0 0 0 0 0 0 0 0 0 0 1.9939 -5.7639 0.0000 N 0 0 0 0 0 0 0 0 0 0 0 0 1.3320 -4.6095 0.0000 C 0 0 0 0 0 0 0 0 0 0 0 0 1.9939 -3.4632 0.0000 C 0 0 0 0 0 0 0 0 0 0 0 0 1.3320 -2.3088 0.0000 C 0 0 0 0 0 0 0 0 0 0 0 0 1.9939 -1.15…	MFCD10024834	C6 H14 N2 O	130.111	109095	167
FALSE		C18 H38 N2 O	Full match	No results		298.298	11.894	5.09597e+09	0	No MS2	187203	11630.3	172960	3.17037e+08	3.67104e+08	2.6048e+06	2.34669e+06	1.67194e+06	1.41125e+06	4.80111e+06	5.09597e+09	1.51742e+06	2.94499e+06	2.86245e+09	2.01396e+06	2.68077e+08	1.74348e+08	1.61522e+06	2.24153e+08	6.08794e+07	4.152e+06	3.33138e+09	1.114e+06	1.13498e+06	2.34115e+06	3.16409e+08	3.13808e+08	1.74088e+06	2.86811e+09	466034	610461	275222	515506	1.41497e+06	1.25752e+06	2.14307e+06	3.1854e+08	3.22815e+08	3.7616e+09
	Checked	Structure	Name	Formula	Molecular Weight	CSID	# References
FALSE			No results	No results		181.978	9.77	4.9618e+09	0	No MS2	2.38761e+06	112902	4.9618e+09	9.20483e+06	7.45967e+06	9.68332e+06	4.47101e+06	4.48193e+06	3.51905e+06	5.83122e+06	9.91433e+06	5.38875e+06	7.47506e+06	6.36383e+06	7.4076e+06	4.98418e+06	4.10944e+06	6.35876e+06	5.92512e+06	2.09183e+06	2.7743e+06	8.0855e+06	7.17516e+06	8.22091e+06	9.95324e+06	9.25982e+06	8.2956e+06	6.81912e+06	1.1256e+07	5.90029e+06	7.76491e+06	3.51004e+06	4.78933e+06	1.00336e+07	6.13297e+06	7.2926e+06	2.33243e+06	2.33181e+06	2.86535e+06
	Checked	Structure	Name	Formula	Molecular Weight	CSID	# References
FALSE			No results	No results		118.076	1.315	4.85314e+09	0	No MS2	57506.2	64885.5	67683.1	1.74965e+09	1.63647e+09	2.40371e+09	3.67881e+07	1.73282e+09	5.26134e+08	6.40666e+08	2.01448e+09	3.79349e+08	1.85669e+09	2.09217e+09	562827	1.55948e+09	1.33689e+09	2.57536e+08	1.24419e+09	1.85065e+09	6.98612e+08	5.42731e+08	2.81931e+09	1.59525e+09	670608	1.83626e+09	1.52972e+09	1.83621e+09	4.85314e+09	1.71296e+07	7.32907e+08	6.98568e+07	1.02693e+09	2.01398e+09	1.21861e+09	723917	1.71997e+09	1.73111e+09	6.80383e+08
	Checked	Structure	Name	Formula	Molecular Weight	CSID	# References
FALSE	L-Pyroglutamic acid	C5 H7 N O3	Full match	Full match		129.043	1.617	4.72347e+09	10	No MS2	21174.1	23028.6	25796.6	2.59868e+09	2.66552e+09	3.82129e+07	3.87809e+07	5.75808e+07	3.84076e+07	3.78262e+07	1.36438e+09	2.47892e+07	4.1546e+07	4.72347e+09	321287	2.34739e+09	2.84222e+08	3.91534e+07	4.20799e+07	1.67585e+06	3.40409e+07	7.67458e+07	2.46056e+09	2.59518e+07	433261	2.44114e+09	2.58187e+09	9.27331e+06	8.45182e+08	9.14296e+07	2.09547e+07	8.3835e+07	2.73741e+07	2.18759e+07	9.02649e+07	359127	3.54295e+08	2.56177e+09	1.17525e+08
	Checked	Structure	Name	Formula	Molecular Weight	CSID	# References
	FALSE	# ACD/Labs04281711052D 10 10 0 0 1 0 0 0 0 0 1 V2000 3.7801 -4.3599 0.0000 O 0 0 0 0 0 0 0 0 0 0 0 0 3.3702 -3.0956 0.0000 C 0 0 0 0 0 0 0 0 0 0 0 0 4.1507 -2.0187 0.0000 C 0 0 0 0 0 0 0 0 0 0 0 0 3.3702 -0.9417 0.0000 C 0 0 0 0 0 0 0 0 0 0 0 0 2.1059 -1.3559 0.0000 C 0 0 0 0 0 0 0 0 0 0 0 0 1.5652 -0.1395 0.0000 H 0 0 0 0 0 0 0 0 0 0 0 0 0.7804 -1.2164 0.0000 C 0 0 0 0 0 0 0 0 0 0 0 0 0.2398 0.0…	L-Pyroglutamic acid	C5 H7 N O3	129.043	7127	901
	FALSE	# ACD/Labs04281710332D 9 9 0 0 0 0 0 0 0 0 1 V2000 2.2370 -0.1647 0.0000 O 0 0 0 0 0 0 0 0 0 0 0 0 0.7960 -3.2846 0.0000 O 0 0 0 0 0 0 0 0 0 0 0 0 4.5746 -0.5398 0.0000 O 0 0 0 0 0 0 0 0 0 0 0 0 2.8957 -2.2141 0.0000 N 0 0 0 0 0 0 0 0 0 0 0 0 1.1528 -0.9469 0.0000 C 0 0 0 0 0 0 0 0 0 0 0 0 1.5691 -2.2141 0.0000 C 0 0 0 0 0 0 0 0 0 0 0 0 3.3166 -0.9469 0.0000 C 0 0 0 0 0 0 0 0 0 0 0 0 0.2104 0.000…	dimethadione	C5 H7 N O3	129.043	2972	414
	FALSE	# ACD/Labs02211713302D 9 9 0 0 0 0 0 0 0 0 1 V2000 0.0000 -2.1867 0.0000 O 0 0 0 0 0 0 0 0 0 0 0 0 0.9914 -1.2973 0.0000 C 0 0 0 0 0 0 0 0 0 0 0 0 0.7138 0.0000 0.0000 O 0 0 0 0 0 0 0 0 0 0 0 0 2.2546 -1.7108 0.0000 C 0 0 0 0 0 0 0 0 0 0 0 0 3.3253 -0.9290 0.0000 N 0 0 0 0 0 0 0 0 0 0 0 0 4.4017 -1.7108 0.0000 C 0 0 0 0 0 0 0 0 0 0 0 0 5.6649 -1.2973 0.0000 O 0 0 0 0 0 0 0 0 0 0 0 0 3.9938 -2.979…	Pyroglutamic acid	C5 H7 N O3	129.043	485	398
	FALSE	# ACD/Labs02211713302D 9 9 0 0 1 0 0 0 0 0 1 V2000 0.7138 0.0000 0.0000 O 0 0 0 0 0 0 0 0 0 0 0 0 0.9914 -1.2973 0.0000 C 0 0 0 0 0 0 0 0 0 0 0 0 2.2546 -1.7108 0.0000 C 0 0 0 0 0 0 0 0 0 0 0 0 2.6625 -2.9798 0.0000 C 0 0 0 0 0 0 0 0 0 0 0 0 3.9938 -2.9798 0.0000 C 0 0 0 0 0 0 0 0 0 0 0 0 4.4017 -1.7108 0.0000 C 0 0 0 0 0 0 0 0 0 0 0 0 3.3253 -0.9290 0.0000 N 0 0 0 0 0 0 0 0 0 0 0 0 5.6649 -1.297…	D-(+)-Pyroglutamic Acid	C5 H7 N O3	129.043	388752	219
	FALSE	# ACD/Labs06251410122D 10 10 0 0 1 0 0 0 0 0 1 V2000 3.7801 -4.3599 0.0000 O 0 0 0 0 0 0 0 0 0 0 0 0 3.3702 -3.0956 0.0000 C 0 0 0 0 0 0 0 0 0 0 0 0 4.1507 -2.0187 0.0000 C 0 0 0 0 0 0 0 0 0 0 0 0 3.3702 -0.9417 0.0000 N 0 0 0 0 0 0 0 0 0 0 0 0 2.1059 -1.3559 0.0000 C 0 0 0 0 0 0 0 0 0 0 0 0 1.5652 -0.1395 0.0000 H 0 0 0 0 0 0 0 0 0 0 0 0 2.1059 -2.6857 0.0000 C 0 0 0 0 0 0 0 0 0 0 0 0 0.7804 -1.…	4-oxo-Proline	C5 H7 N O3	129.043	96760	79
	FALSE	# ACD/Labs06251410122D 9 9 0 0 0 0 0 0 0 0 1 V2000 3.9640 -5.1082 0.0000 O 0 0 0 0 0 0 0 0 0 0 0 0 3.5553 -3.8414 0.0000 C 0 0 0 0 0 0 0 0 0 0 0 0 4.3369 -2.7687 0.0000 C 0 0 0 0 0 0 0 0 0 0 0 0 3.5553 -1.6908 0.0000 N 0 0 0 0 0 0 0 0 0 0 0 0 2.2885 -2.1046 0.0000 C 0 0 0 0 0 0 0 0 0 0 0 0 2.2885 -3.4327 0.0000 C 0 0 0 0 0 0 0 0 0 0 0 0 1.2158 -1.3230 0.0000 C 0 0 0 0 0 0 0 0 0 0 0 0 1.3537 0.000…	4-Oxoproline	C5 H7 N O3	129.043	366185	55
	FALSE	#100321 -OEChem-02070708192D 16 15 0 0 0 0 0 0 0999 V2000 2.5369 0.2500 0.0000 O 0 0 0 0 0 0 0 0 0 0 0 0 6.0010 1.2500 0.0000 O 0 0 0 0 0 0 0 0 0 0 0 0 3.4030 -1.2500 0.0000 O 0 0 0 0 0 0 0 0 0 0 0 0 5.1350 -0.2500 0.0000 N 0 0 0 0 0 0 0 0 0 0 0 0 4.2690 0.2500 0.0000 C 0 0 0 0 0 0 0 0 0 0 0 0 6.0010 0.2500 0.0000 C 0 0 0 0 0 0 0 0 0 0 0 0 3.4030 -0.2500 0.0000 C 0 0 0 0 0 0 0 0 0 0 0 0 6.8671 -0…	N-Acryloylglycine	C5 H7 N O3	129.043	90657	33
	FALSE	# ACD/Labs06251410122D 9 9 0 0 0 0 0 0 0 0 1 V2000 0.7883 -5.6715 0.0000 O 0 0 0 0 0 0 0 0 0 0 0 0 1.6788 -4.6846 0.0000 C 0 0 0 0 0 0 0 0 0 0 0 0 2.9775 -4.9569 0.0000 O 0 0 0 0 0 0 0 0 0 0 0 0 1.2647 -3.4199 0.0000 C 0 0 0 0 0 0 0 0 0 0 0 0 2.0474 -2.3423 0.0000 C 0 0 0 0 0 0 0 0 0 0 0 0 1.2647 -1.2647 0.0000 C 0 0 0 0 0 0 0 0 0 0 0 0 1.6788 0.0000 0.0000 O 0 0 0 0 0 0 0 0 0 0 0 0 0.0000 -1.678…	Pyrroline hydroxycarboxylic acid	C5 H7 N O3	129.043	1030	26
	FALSE	# ACD/Labs04221415492D 9 9 0 0 0 0 0 0 0 0 1 V2000 3.6419 0.0000 0.0000 O 0 0 0 0 0 0 0 0 0 0 0 0 4.7919 -1.9982 0.0000 O 0 0 0 0 0 0 0 0 0 0 0 0 0.0000 -4.3606 0.0000 O 0 0 0 0 0 0 0 0 0 0 0 0 1.4040 -1.2219 0.0000 N 0 0 0 0 0 0 0 0 0 0 0 0 2.4918 -1.9886 0.0000 C 0 0 0 0 0 0 0 0 0 0 0 0 3.6371 -1.3322 0.0000 C 0 0 0 0 0 0 0 0 0 0 0 0 2.0941 -3.2633 0.0000 C 0 0 0 0 0 0 0 0 0 0 0 0 0.7667 -3.277…	4-hydroxy-1-pyrroline-2-carboxylic acid	C5 H7 N O3	129.043	389257	20
	FALSE	# ACD/Labs04221415492D 9 9 0 0 1 0 0 0 0 0 1 V2000 3.5438 0.0000 0.0000 O 0 0 0 0 0 0 0 0 0 0 0 0 4.6938 -1.9714 0.0000 O 0 0 0 0 0 0 0 0 0 0 0 0 0.0000 -4.4028 0.0000 O 0 0 0 0 0 0 0 0 0 0 0 0 1.3143 -1.2204 0.0000 N 0 0 0 0 0 0 0 0 0 0 0 0 2.3938 -2.0043 0.0000 C 0 0 0 0 0 0 0 0 0 0 0 0 3.5532 -1.3143 0.0000 C 0 0 0 0 0 0 0 0 0 0 0 0 2.0324 -3.3373 0.0000 C 0 0 0 0 0 0 0 0 0 0 0 0 0.6994 -3.285…	(3R,5S)-1-pyrroline-3-hydroxy-5-carboxylic acid	C5 H7 N O3	129.043	10140260	11
FALSE	(9Z)-9-Octadecenamide	C18 H35 N O	Full match	Full match		281.271	15.42	4.71156e+09	3	No MS2	261792	30749.4	203820	1.01757e+09	8.47065e+08	6.18315e+08	8.11617e+08	1.5699e+08	3.29867e+07	1.46483e+09	4.71156e+09	6.31467e+07	3.24495e+08	2.22436e+09	3.19865e+06	6.2697e+08	5.16791e+08	2.68946e+08	2.65673e+09	9.04338e+08	2.78228e+08	3.66558e+09	1.11469e+08	8.16365e+07	3.10207e+06	9.85264e+08	7.13922e+08	3.92579e+08	3.8337e+09	1.36972e+08	1.12089e+08	1.56433e+08	7.73281e+08	3.83681e+08	7.95459e+07	3.03874e+06	8.2846e+08	9.72362e+08	3.50428e+09
	Checked	Structure	Name	Formula	Molecular Weight	CSID	# References
	FALSE	# ACD/Labs03221914022D 22 21 0 0 0 0 0 0 0 0 1 V2000 16.0895 0.0000 0.0000 C 0 0 0 0 0 0 0 0 0 0 0 0 14.9471 -0.6758 0.0000 C 0 0 0 0 0 0 0 0 0 0 0 0 14.9471 -1.9951 0.0000 C 0 0 0 0 0 0 0 0 0 0 0 0 13.7887 -2.6548 0.0000 C 0 0 0 0 0 0 0 0 0 0 0 0 13.7887 -3.9902 0.0000 C 0 0 0 0 0 0 0 0 0 0 0 0 12.6463 -4.6499 0.0000 C 0 0 0 0 0 0 0 0 0 0 0 0 12.6463 -5.9853 0.0000 C 0 0 0 0 0 0 0 0 0 0 0 0 11.4…	(9Z)-9-Octadecenamide	C18 H35 N O	281.272	4446508	249
	FALSE	# ACD/Labs04281710562D 20 20 0 0 0 0 0 0 0 0 1 V2000 0.1273 -5.7135 0.0000 O 0 0 0 0 0 0 0 0 0 0 0 0 2.1355 -4.5539 0.0000 N 0 0 0 0 0 0 0 0 0 0 0 0 0.8061 -4.5539 0.0000 C 0 0 0 0 0 0 0 0 0 0 0 0 2.9416 -3.4932 0.0000 C 0 0 0 0 0 0 0 0 0 0 0 0 2.8002 -5.7135 0.0000 C 0 0 0 0 0 0 0 0 0 0 0 0 0.0000 -3.5639 0.0000 C 0 0 0 0 0 0 0 0 0 0 0 0 2.6729 -2.2204 0.0000 C 0 0 0 0 0 0 0 0 0 0 0 0 0.2687 -2.…	5422	C18 H35 N O	281.272	39176	198
	FALSE	# ACD/Labs04221415492D 20 21 0 0 0 0 0 0 0 0 1 V2000 6.9277 -1.9897 0.0000 O 0 0 0 0 0 0 0 0 0 0 0 0 4.5916 -3.3269 0.0000 N 0 0 0 0 0 0 0 0 0 0 0 0 3.4638 -3.9874 0.0000 C 0 0 0 0 0 0 0 0 0 0 0 0 4.5916 -1.9897 0.0000 C 0 0 0 0 0 0 0 0 0 0 0 0 5.7919 -3.9874 0.0000 C 0 0 0 0 0 0 0 0 0 0 0 0 5.7919 -1.3291 0.0000 C 0 0 0 0 0 0 0 0 0 0 0 0 6.9277 -3.3269 0.0000 C 0 0 0 0 0 0 0 0 0 0 0 0 3.4638 -2.…	511312	C18 H35 N O	281.272	55760	76
FALSE	N-Hydroxydecanamide	C10 H21 N O2	Full match	Full match		187.157	10.648	4.21669e+09	1	No MS2	306876	25629.4	365799	4.83636e+08	4.24327e+08	4.89784e+06	2.10177e+06	3.06548e+06	797599	1.88565e+06	1.30053e+09	3.49543e+06	3.0253e+06	2.52508e+09	329868	3.26269e+08	2.75005e+08	968268	4.67978e+08	6.01139e+07	5.79463e+06	4.21669e+09	4.84655e+06	2.83007e+06	359277	4.20466e+08	3.37463e+08	4.9583e+06	1.0067e+09	896745	2.86441e+06	998047	2.16729e+06	3.94443e+06	2.65528e+06	348439	3.977e+08	3.94313e+08	3.67326e+09
	Checked	Structure	Name	Formula	Molecular Weight	CSID	# References
	FALSE	# ACD/Labs04281711462D 13 12 0 0 0 0 0 0 0 0 1 V2000 2.3643 0.0000 0.0000 O 0 0 0 0 0 0 0 0 0 0 0 0 0.0000 -1.3347 0.0000 O 0 0 0 0 0 0 0 0 0 0 0 0 1.2203 -1.9957 0.0000 N 0 0 0 0 0 0 0 0 0 0 0 0 2.3643 -1.3347 0.0000 C 0 0 0 0 0 0 0 0 0 0 0 0 3.5210 -1.9829 0.0000 C 0 0 0 0 0 0 0 0 0 0 0 0 4.6650 -1.3220 0.0000 C 0 0 0 0 0 0 0 0 0 0 0 0 5.8217 -1.9829 0.0000 C 0 0 0 0 0 0 0 0 0 0 0 0 6.9657 -1.3…	N-Hydroxydecanamide	C10 H21 N O2	187.157	125940	43
FALSE		C18 H36 N2 O	Full match	No results		296.282	11.66	3.6269e+09	0	No MS2	153759	11708.3	156987	2.63962e+08	2.84468e+08	1.46521e+06	7.1972e+06	1.18315e+06	800357	4.67648e+06	3.6269e+09	787091	1.95785e+06	2.22243e+09	1.72037e+06	1.7493e+08	1.4376e+08	1.10515e+06	1.70856e+08	5.3869e+07	1.51124e+06	3.09432e+09	921244	706613	1.90421e+06	2.94138e+08	3.06196e+08	917296	2.14347e+09	547298	723246	354429	923904	906411	824089	1.48539e+06	2.23169e+08	2.11899e+08	3.14752e+09
	Checked	Structure	Name	Formula	Molecular Weight	CSID	# References
FALSE	3-oxolauric acid	C12 H22 O3	Full match	Full match		214.156	12.254	3.59162e+09	2	No MS2	427848	46242.4	487375	5.90847e+08	6.09166e+08	2.91996e+06	857467	1.1893e+06	797433	1.58382e+06	3.33762e+09	741747	3.20992e+06	1.95347e+09	685426	4.29081e+08	3.52171e+08	950518	5.78423e+08	3.14196e+08	1.67447e+06	3.59162e+09	934899	1.46053e+06	765944	5.61852e+08	5.35936e+08	2.67451e+06	2.9517e+09	941093	1.35166e+06	698400	781776	1.02771e+06	1.24917e+06	723042	5.53973e+08	5.29438e+08	2.63673e+09
	Checked	Structure	Name	Formula	Molecular Weight	CSID	# References
	FALSE	# ACD/Labs04221415492D 15 14 0 0 0 0 0 0 0 0 1 V2000 10.4056 0.0000 0.0000 O 0 0 0 0 0 0 0 0 0 0 0 0 12.7226 0.0000 0.0000 O 0 0 0 0 0 0 0 0 0 0 0 0 13.8741 -1.9424 0.0000 O 0 0 0 0 0 0 0 0 0 0 0 0 10.4056 -1.2625 0.0000 C 0 0 0 0 0 0 0 0 0 0 0 0 11.5710 -1.9424 0.0000 C 0 0 0 0 0 0 0 0 0 0 0 0 12.7226 -1.2625 0.0000 C 0 0 0 0 0 0 0 0 0 0 0 0 9.2540 -1.9424 0.0000 C 0 0 0 0 0 0 0 0 0 0 0 0 8.1025…	3-oxolauric acid	C12 H22 O3	214.157	388783	38
	FALSE	#61457 -OEChem-02070708212D 37 37 0 1 0 0 0 0 0999 V2000 6.2859 -0.1107 0.0000 O 0 0 0 0 0 0 0 0 0 0 0 0 7.3737 -2.4585 0.0000 O 0 0 0 0 0 0 0 0 0 0 0 0 8.7750 -1.4405 0.0000 O 0 0 0 0 0 0 0 0 0 0 0 0 5.4769 -0.6985 0.0000 C 0 0 3 0 0 0 0 0 0 0 0 0 5.7859 -1.6495 0.0000 C 0 0 0 0 0 0 0 0 0 0 0 0 6.7859 -1.6495 0.0000 C 0 0 3 0 0 0 0 0 0 0 0 0 4.5258 -0.3894 0.0000 C 0 0 0 0 0 0 0 0 0 0 0 0 7.0949…	2-Hexyltetrahydrofuran-4-yl acetate	C12 H22 O3	214.157	55379	23
FALSE			No results	No results		351.332	12.223	3.53098e+09	0	No MS2	227821	16539.2	275669	3.18169e+08	3.71153e+08	2.29391e+06	1.1747e+06	1.40268e+06	1.31949e+06	3.34318e+06	3.53098e+09	1.69664e+06	2.83859e+06	2.25143e+09	1.2967e+06	1.91718e+08	1.88276e+08	1.35982e+06	2.06728e+08	6.65582e+07	3.61633e+06	3.27277e+09	1.08194e+06	1.21961e+06	1.91137e+06	3.36496e+08	2.82939e+08	1.70155e+06	2.72045e+09	792812	771918	340404	296382	1.33378e+06	1.06484e+06	1.54201e+06	3.00353e+08	2.52531e+08	2.6723e+09
	Checked	Structure	Name	Formula	Molecular Weight	CSID	# References
FALSE			No results	No results		195.953	1.04	3.45636e+09	0	No MS2	67158.5	64661.3	359593	1.72624e+07	1.7366e+07	1.01569e+07	6.41657e+06	1.20828e+07	7.84568e+06	6.91961e+06	2.28586e+07	1.19213e+07	1.08522e+07	1.80201e+07	531098	1.6305e+07	1.47387e+07	7.8887e+06	1.50856e+07	1.06235e+07	1.08561e+07	2.16771e+07	2.52182e+07	1.14965e+07	593341	1.89994e+07	1.84314e+07	1.2798e+07	2.23727e+07	3.45636e+09	1.1781e+07	7.39246e+06	7.75599e+06	1.42435e+07	3.24823e+07	586260	1.7832e+07	1.68456e+07	2.19132e+07
	Checked	Structure	Name	Formula	Molecular Weight	CSID	# References
FALSE		C8 H9 N	Full match	No results		119.074	5.054	3.41807e+09	0	No MS2	1.59132e+06	37121	38706.9	2.29389e+09	2.41856e+09	1.48229e+09	1.36426e+09	5.30699e+08	1.43843e+09	1.95499e+09	3.41807e+09	1.6749e+09	6.75383e+08	2.4129e+09	183179	2.00103e+09	1.80976e+09	1.47893e+09	1.82361e+09	1.16538e+09	2.61986e+09	2.9797e+09	2.96417e+09	2.41648e+09	336196	2.37231e+09	2.33951e+09	4.30884e+08	2.81258e+09	5.7666e+08	1.90203e+09	1.41194e+09	5.44138e+08	6.07869e+08	1.65528e+09	198821	2.09466e+09	2.02755e+09	2.54213e+09
	Checked	Structure	Name	Formula	Molecular Weight	CSID	# References
FALSE	L-(+)-Leucine	C6 H13 N O2	Full match	Full match		131.095	2.591	3.2743e+09	18	No MS2	1.0133e+06	22724.2	23253.8	8.46589e+08	1.54076e+09	1.829e+08	7.96367e+08	8.02613e+07	6.20449e+08	5.11619e+08	8.9611e+08	9.21928e+08	2.28061e+08	1.19567e+09	9.80011e+06	6.62132e+08	5.08843e+08	1.03954e+08	2.74315e+09	1.12501e+08	1.81366e+09	1.94918e+09	8.85336e+08	1.23067e+09	1.07165e+07	1.72309e+09	1.26083e+09	1.50158e+08	2.53914e+09	1.83757e+08	1.05473e+08	6.9424e+08	5.37071e+07	2.71304e+09	1.81167e+09	9.93107e+06	1.06233e+09	9.16085e+08	1.51885e+09
	Checked	Structure	Name	Formula	Molecular Weight	CSID	# References
	FALSE	# ACD/Labs03221913572D 10 9 0 0 1 0 0 0 0 0 1 V2000 0.0000 -1.3313 0.0000 C 0 0 0 0 0 0 0 0 0 0 0 0 1.1526 -1.9941 0.0000 C 0 0 0 0 0 0 0 0 0 0 0 0 1.1526 -3.3254 0.0000 C 0 0 0 0 0 0 0 0 0 0 0 0 2.3053 -1.3313 0.0000 C 0 0 0 0 0 0 0 0 0 0 0 0 3.4579 -1.9941 0.0000 C 0 0 0 0 0 0 0 0 0 0 0 0 4.6106 -1.3313 0.0000 C 0 0 0 0 0 0 0 0 0 0 0 0 4.6106 0.0000 0.0000 O 0 0 0 0 0 0 0 0 0 0 0 0 5.7632 -1.99…	L-(+)-Leucine	C6 H13 N O2	131.095	5880	16707
	FALSE	# ACD/Labs04281710322D 9 8 0 0 1 0 0 0 0 0 1 V2000 0.0000 -3.4573 0.0000 N 0 0 0 0 0 0 0 0 0 0 0 0 1.3311 -3.4573 0.0000 C 0 0 0 0 0 0 0 0 0 0 0 0 1.9937 -2.3049 0.0000 C 0 0 0 0 0 0 0 0 0 0 0 0 3.3248 -2.3049 0.0000 C 0 0 0 0 0 0 0 0 0 0 0 0 1.3311 -1.1524 0.0000 C 0 0 0 0 0 0 0 0 0 0 0 0 1.9937 0.0000 0.0000 C 0 0 0 0 0 0 0 0 0 0 0 0 1.9937 -4.6097 0.0000 C 0 0 0 0 0 0 0 0 0 0 0 0 1.3311 -5.762…	L-(+)-Isoleucine	C6 H13 N O2	131.095	6067	5163
	FALSE	# ACD/Labs04281713422D 9 8 0 0 0 0 0 0 0 0 1 V2000 0.0000 -4.6067 0.0000 N 0 0 0 0 0 0 0 0 0 0 0 0 1.3308 -4.6067 0.0000 C 0 0 0 0 0 0 0 0 0 0 0 0 1.9962 -3.4587 0.0000 C 0 0 0 0 0 0 0 0 0 0 0 0 3.3271 -3.4587 0.0000 C 0 0 0 0 0 0 0 0 0 0 0 0 3.9852 -2.3033 0.0000 C 0 0 0 0 0 0 0 0 0 0 0 0 5.3160 -2.3033 0.0000 C 0 0 0 0 0 0 0 0 0 0 0 0 5.9814 -1.1553 0.0000 C 0 0 0 0 0 0 0 0 0 0 0 0 7.3122 -1.15…	Aminocaproic acid	C6 H13 N O2	131.095	548	2247
	FALSE	# ACD/Labs03221914022D 9 8 0 0 0 0 0 0 0 0 1 V2000 0.0000 -1.3311 0.0000 C 0 0 0 0 0 0 0 0 0 0 0 0 1.1524 -1.9937 0.0000 C 0 0 0 0 0 0 0 0 0 0 0 0 1.1524 -3.3248 0.0000 C 0 0 0 0 0 0 0 0 0 0 0 0 2.3049 -1.3311 0.0000 C 0 0 0 0 0 0 0 0 0 0 0 0 3.4573 -1.9937 0.0000 C 0 0 0 0 0 0 0 0 0 0 0 0 4.6097 -1.3311 0.0000 C 0 0 0 0 0 0 0 0 0 0 0 0 4.6097 0.0000 0.0000 O 0 0 0 0 0 0 0 0 0 0 0 0 5.7622 -1.993…	Leucine	C6 H13 N O2	131.095	834	817
	FALSE	# ACD/Labs04221415492D 9 8 0 0 0 0 0 0 0 0 1 V2000 1.1242 -0.0742 0.0000 O 0 0 0 0 0 0 0 0 0 0 0 0 0.0000 -2.1571 0.0000 O 0 0 0 0 0 0 0 0 0 0 0 0 2.3169 -3.3555 0.0000 N 0 0 0 0 0 0 0 0 0 0 0 0 2.2713 -2.0259 0.0000 C 0 0 0 0 0 0 0 0 0 0 0 0 1.1014 -1.3981 0.0000 C 0 0 0 0 0 0 0 0 0 0 0 0 3.4012 -1.3297 0.0000 C 0 0 0 0 0 0 0 0 0 0 0 0 4.5711 -1.9574 0.0000 C 0 0 0 0 0 0 0 0 0 0 0 0 3.3612 0.000…	DL-Isoleucine	C6 H13 N O2	131.095	769	725
	FALSE	# ACD/Labs04281711232D 9 8 0 0 1 0 0 0 0 0 1 V2000 5.6901 0.0000 0.0000 O 0 0 0 0 0 0 0 0 0 0 0 0 6.8226 -1.9649 0.0000 O 0 0 0 0 0 0 0 0 0 0 0 0 4.5370 -3.4113 0.0000 N 0 0 0 0 0 0 0 0 0 0 0 0 4.5370 -1.9581 0.0000 C 0 0 0 0 0 0 0 0 0 0 0 0 5.6901 -1.3031 0.0000 C 0 0 0 0 0 0 0 0 0 0 0 0 3.3977 -1.3031 0.0000 C 0 0 0 0 0 0 0 0 0 0 0 0 2.2583 -1.9581 0.0000 C 0 0 0 0 0 0 0 0 0 0 0 0 1.0643 -1.425…	L-(+)-norleucine	C6 H13 N O2	131.095	19964	522
	FALSE	# ACD/Labs03221914022D 10 9 0 0 1 0 0 0 0 0 1 V2000 0.0000 -1.3313 0.0000 C 0 0 0 0 0 0 0 0 0 0 0 0 1.1526 -1.9941 0.0000 C 0 0 0 0 0 0 0 0 0 0 0 0 1.1526 -3.3254 0.0000 C 0 0 0 0 0 0 0 0 0 0 0 0 2.3053 -1.3313 0.0000 C 0 0 0 0 0 0 0 0 0 0 0 0 3.4579 -1.9941 0.0000 C 0 0 0 0 0 0 0 0 0 0 0 0 4.6106 -1.3313 0.0000 C 0 0 0 0 0 0 0 0 0 0 0 0 4.6106 0.0000 0.0000 O 0 0 0 0 0 0 0 0 0 0 0 0 5.7632 -1.99…	H-Leu-OH	C6 H13 N O2	131.095	388617	321
	FALSE	# ACD/Labs03221913572D 9 9 0 0 0 0 0 0 0 0 1 V2000 3.4538 0.0000 0.0000 C 0 0 0 0 0 0 0 0 0 0 0 0 4.6051 -0.6677 0.0000 C 0 0 0 0 0 0 0 0 0 0 0 0 5.7564 0.0000 0.0000 O 0 0 0 0 0 0 0 0 0 0 0 0 2.3025 -0.6677 0.0000 N 0 0 0 0 0 0 0 0 0 0 0 0 2.3025 -1.9975 0.0000 C 0 0 0 0 0 0 0 0 0 0 0 0 1.1513 -2.6594 0.0000 C 0 0 0 0 0 0 0 0 0 0 0 0 0.0000 -1.9975 0.0000 O 0 0 0 0 0 0 0 0 0 0 0 0 0.0000 -0.6677…	QE3510000	C6 H13 N O2	131.095	55110	209
	FALSE	# ACD/Labs04281711402D 9 8 0 0 1 0 0 0 0 0 1 V2000 4.6097 0.0000 0.0000 O 0 0 0 0 0 0 0 0 0 0 0 0 4.6097 -1.3311 0.0000 C 0 0 0 0 0 0 0 0 0 0 0 0 5.7622 -1.9937 0.0000 O 0 0 0 0 0 0 0 0 0 0 0 0 3.4573 -1.9937 0.0000 C 0 0 0 0 0 0 0 0 0 0 0 0 3.4573 -3.3248 0.0000 N 0 0 0 0 0 0 0 0 0 0 0 0 2.3049 -1.3311 0.0000 C 0 0 0 0 0 0 0 0 0 0 0 0 2.3049 0.0000 0.0000 C 0 0 0 0 0 0 0 0 0 0 0 0 1.1524 -1.9937…	D-allo-Isoleucine	C6 H13 N O2	131.095	85019	180
	FALSE	# ACD/Labs04281711382D 11 10 0 0 1 0 0 0 0 0 1 V2000 0.0000 -1.9931 0.0000 N 0 0 0 0 0 0 0 0 0 0 0 0 1.3318 -1.9931 0.0000 C 0 0 0 0 0 0 0 0 0 0 0 0 1.3318 -3.3249 0.0000 H 0 0 0 0 0 0 0 0 0 0 0 0 2.6590 -1.9931 0.0000 C 0 0 0 0 0 0 0 0 0 0 0 0 2.6590 -3.3249 0.0000 H 0 0 0 0 0 0 0 0 0 0 0 0 2.6590 -0.6659 0.0000 C 0 0 0 0 0 0 0 0 0 0 0 0 3.9908 -1.9931 0.0000 C 0 0 0 0 0 0 0 0 0 0 0 0 4.6567 -0.…	L-Alloisoleucine	C6 H13 N O2	131.095	89698	179
	FALSE	# ACD/Labs04281712082D 9 8 0 0 1 0 0 0 0 0 1 V2000 1.1242 -0.0742 0.0000 O 0 0 0 0 0 0 0 0 0 0 0 0 0.0000 -2.1571 0.0000 O 0 0 0 0 0 0 0 0 0 0 0 0 2.3169 -3.3555 0.0000 N 0 0 0 0 0 0 0 0 0 0 0 0 2.2713 -2.0259 0.0000 C 0 0 0 0 0 0 0 0 0 0 0 0 1.1014 -1.3981 0.0000 C 0 0 0 0 0 0 0 0 0 0 0 0 3.4012 -1.3297 0.0000 C 0 0 0 0 0 0 0 0 0 0 0 0 4.5711 -1.9574 0.0000 C 0 0 0 0 0 0 0 0 0 0 0 0 3.3612 0.000…	D-Isoleucine	C6 H13 N O2	131.095	69017	159
	FALSE	# ACD/Labs02211713302D 9 8 0 0 1 0 0 0 0 0 1 V2000 0.0000 -1.9953 0.0000 C 0 0 0 0 0 0 0 0 0 0 0 0 1.1520 -2.6588 0.0000 C 0 0 0 0 0 0 0 0 0 0 0 0 1.1520 -3.9905 0.0000 C 0 0 0 0 0 0 0 0 0 0 0 0 2.3040 -1.9953 0.0000 C 0 0 0 0 0 0 0 0 0 0 0 0 2.3040 -0.6635 0.0000 C 0 0 0 0 0 0 0 0 0 0 0 0 3.4560 0.0000 0.0000 O 0 0 0 0 0 0 0 0 0 0 0 0 1.1520 0.0000 0.0000 O 0 0 0 0 0 0 0 0 0 0 0 0 3.4560 -2.6588…	1721712	C6 H13 N O2	131.095	392093	122
	FALSE	# ACD/Labs04281711332D 9 8 0 0 0 0 0 0 0 0 1 V2000 1.1365 -0.6601 0.0000 O 0 0 0 0 0 0 0 0 0 0 0 0 0.0000 -2.6634 0.0000 O 0 0 0 0 0 0 0 0 0 0 0 0 3.4498 -1.9918 0.0000 N 0 0 0 0 0 0 0 0 0 0 0 0 2.2960 -2.6634 0.0000 C 0 0 0 0 0 0 0 0 0 0 0 0 1.1480 -1.9918 0.0000 C 0 0 0 0 0 0 0 0 0 0 0 0 4.6036 -2.6634 0.0000 C 0 0 0 0 0 0 0 0 0 0 0 0 3.4498 -0.6659 0.0000 C 0 0 0 0 0 0 0 0 0 0 0 0 5.7401 -1.99…	N,N-Diethylglycine	C6 H13 N O2	131.095	66762	114
	FALSE	# ACD/Labs06251410112D 10 9 0 0 1 0 0 0 0 0 1 V2000 0.0000 -2.3043 0.0000 N 0 0 0 0 0 0 0 0 0 0 0 0 1.3314 -2.3043 0.0000 C 0 0 0 0 0 0 0 0 0 0 0 0 1.3314 -3.6356 0.0000 H 0 0 0 0 0 0 0 0 0 0 0 0 1.3314 -0.9776 0.0000 C 0 0 0 0 0 0 0 0 0 0 0 0 2.4812 -0.3119 0.0000 C 0 0 0 0 0 0 0 0 0 0 0 0 0.1769 -0.3119 0.0000 C 0 0 0 0 0 0 0 0 0 0 0 0 2.6581 -2.3043 0.0000 C 0 0 0 0 0 0 0 0 0 0 0 0 3.3238 -1.1…	beta-Leucine	C6 H13 N O2	131.095	388796	102
	FALSE	# ACD/Labs04221415492D 9 8 0 0 1 0 0 0 0 0 1 V2000 1.1345 0.0000 0.0000 O 0 0 0 0 0 0 0 0 0 0 0 0 0.0000 -1.9366 0.0000 O 0 0 0 0 0 0 0 0 0 0 0 0 3.4665 0.0000 0.0000 N 0 0 0 0 0 0 0 0 0 0 0 0 3.4665 -1.2663 0.0000 C 0 0 0 0 0 0 0 0 0 0 0 0 2.3320 -1.9366 0.0000 C 0 0 0 0 0 0 0 0 0 0 0 0 1.1345 -1.2663 0.0000 C 0 0 0 0 0 0 0 0 0 0 0 0 4.5322 -1.9366 0.0000 C 0 0 0 0 0 0 0 0 0 0 0 0 5.7297 -1.4038…	(3R)-beta-leucine	C6 H13 N O2	131.095	2042285	98
	FALSE	#5275645 -OEChem-02070710102D 22 21 0 1 0 0 0 0 0999 V2000 6.0010 1.1900 0.0000 O 0 0 0 0 0 0 0 0 0 0 0 0 5.1350 -0.3100 0.0000 O 0 0 0 0 0 0 0 0 0 0 0 0 2.5369 1.1900 0.0000 N 0 0 0 0 0 0 0 0 0 0 0 0 3.4030 0.6900 0.0000 C 0 0 3 0 0 0 0 0 0 0 0 0 3.4030 -0.3100 0.0000 C 0 0 0 0 0 0 0 0 0 0 0 0 2.5369 -0.8100 0.0000 C 0 0 0 0 0 0 0 0 0 0 0 0 4.2690 1.1900 0.0000 C 0 0 0 0 0 0 0 0 0 0 0 0 2.5369 -…	MFCD00044473	C6 H13 N O2	131.095	4439748	52
	FALSE	# ACD/Labs04221415492D 9 8 0 0 0 0 0 0 0 0 2 V2000 0.0000 -1.9315 0.0000 O 0 5 0 0 0 0 0 0 0 0 0 0 1.1742 0.0000 0.0000 O 0 0 0 0 0 0 0 0 0 0 0 0 4.5029 -1.9139 0.0000 N 0 3 0 0 0 0 0 0 0 0 0 0 3.3875 -1.2798 0.0000 C 0 0 0 0 0 0 0 0 0 0 0 0 2.2779 -1.9198 0.0000 C 0 0 0 0 0 0 0 0 0 0 0 0 1.1683 -1.2857 0.0000 C 0 0 0 0 0 0 0 0 0 0 0 0 4.4970 -3.1996 0.0000 C 0 0 0 0 0 0 0 0 0 0 0 0 5.8708 -1.074…	beta-alanine betaine	C6 H13 N O2	131.095	390173	19
	FALSE	# ACD/Labs08121512322D 9 9 0 0 0 0 0 0 0 0 1 V2000 2.3023 0.0000 0.0000 C 0 0 0 0 0 0 0 0 0 0 0 0 2.3023 -3.9901 0.0000 C 0 0 0 0 0 0 0 0 0 0 0 0 3.4554 -3.3237 0.0000 C 0 0 0 0 0 0 0 0 0 0 0 0 2.3023 -1.3287 0.0000 C 0 0 0 0 0 0 0 0 0 0 0 0 1.1531 -3.3237 0.0000 C 0 0 0 0 0 0 0 0 0 0 0 0 1.1531 -1.9950 0.0000 C 0 0 0 0 0 0 0 0 0 0 0 0 3.4554 -1.9950 0.0000 N 0 0 0 0 0 0 0 0 0 0 0 0 0.0000 -3.990…	2-Methyl-3,4-piperidinediol	C6 H13 N O2	131.095	35014134	1
FALSE			No results	No results		158.962	9.781	3.18328e+09	0	No MS2	2.59479e+06	122699	3.18328e+09	2.73847e+06	2.76464e+06	2.84636e+06	4.85897e+06	2.4206e+06	1.93281e+06	5.93491e+06	3.58289e+06	2.30162e+06	2.7622e+06	2.52738e+06	2.58746e+06	2.18975e+06	2.63833e+06	2.55607e+06	3.10876e+06	2.27335e+06	3.01504e+06	2.83671e+06	2.53066e+06	2.56537e+06	2.82359e+06	2.47491e+06	2.53228e+06	3.20774e+06	3.6281e+06	3.24777e+06	2.29977e+06	2.18953e+06	5.20492e+06	2.79274e+06	2.12818e+06	2.84776e+06	2.53483e+06	2.53415e+06	3.38999e+06
	Checked	Structure	Name	Formula	Molecular Weight	CSID	# References
FALSE	L-(+)-Leucine	C6 H13 N O2	Full match	Full match		131.095	1.062	2.85544e+09	18	No MS2	48550.2	51674.6	55108.1	1.28218e+07	9.8996e+06	9.38179e+06	8.94719e+06	6.79968e+06	1.48878e+07	1.15262e+07	1.48815e+07	9.76703e+06	9.86046e+06	1.18671e+07	6.37175e+06	7.99489e+06	9.55275e+06	5.72144e+06	6.64854e+06	1.62708e+07	1.15356e+07	1.41397e+07	1.04796e+07	7.82285e+06	5.59938e+06	9.92077e+06	9.57232e+06	7.87022e+06	1.44486e+07	2.85544e+09	7.10122e+06	7.09364e+06	7.5543e+06	9.47254e+06	2.2559e+08	6.76468e+06	9.94037e+06	1.11664e+07	1.39364e+07
	Checked	Structure	Name	Formula	Molecular Weight	CSID	# References
	FALSE	# ACD/Labs03221913572D 10 9 0 0 1 0 0 0 0 0 1 V2000 0.0000 -1.3313 0.0000 C 0 0 0 0 0 0 0 0 0 0 0 0 1.1526 -1.9941 0.0000 C 0 0 0 0 0 0 0 0 0 0 0 0 1.1526 -3.3254 0.0000 C 0 0 0 0 0 0 0 0 0 0 0 0 2.3053 -1.3313 0.0000 C 0 0 0 0 0 0 0 0 0 0 0 0 3.4579 -1.9941 0.0000 C 0 0 0 0 0 0 0 0 0 0 0 0 4.6106 -1.3313 0.0000 C 0 0 0 0 0 0 0 0 0 0 0 0 4.6106 0.0000 0.0000 O 0 0 0 0 0 0 0 0 0 0 0 0 5.7632 -1.99…	L-(+)-Leucine	C6 H13 N O2	131.095	5880	16707
	FALSE	# ACD/Labs04281710322D 9 8 0 0 1 0 0 0 0 0 1 V2000 0.0000 -3.4573 0.0000 N 0 0 0 0 0 0 0 0 0 0 0 0 1.3311 -3.4573 0.0000 C 0 0 0 0 0 0 0 0 0 0 0 0 1.9937 -2.3049 0.0000 C 0 0 0 0 0 0 0 0 0 0 0 0 3.3248 -2.3049 0.0000 C 0 0 0 0 0 0 0 0 0 0 0 0 1.3311 -1.1524 0.0000 C 0 0 0 0 0 0 0 0 0 0 0 0 1.9937 0.0000 0.0000 C 0 0 0 0 0 0 0 0 0 0 0 0 1.9937 -4.6097 0.0000 C 0 0 0 0 0 0 0 0 0 0 0 0 1.3311 -5.762…	L-(+)-Isoleucine	C6 H13 N O2	131.095	6067	5163
	FALSE	# ACD/Labs04281713422D 9 8 0 0 0 0 0 0 0 0 1 V2000 0.0000 -4.6067 0.0000 N 0 0 0 0 0 0 0 0 0 0 0 0 1.3308 -4.6067 0.0000 C 0 0 0 0 0 0 0 0 0 0 0 0 1.9962 -3.4587 0.0000 C 0 0 0 0 0 0 0 0 0 0 0 0 3.3271 -3.4587 0.0000 C 0 0 0 0 0 0 0 0 0 0 0 0 3.9852 -2.3033 0.0000 C 0 0 0 0 0 0 0 0 0 0 0 0 5.3160 -2.3033 0.0000 C 0 0 0 0 0 0 0 0 0 0 0 0 5.9814 -1.1553 0.0000 C 0 0 0 0 0 0 0 0 0 0 0 0 7.3122 -1.15…	Aminocaproic acid	C6 H13 N O2	131.095	548	2247
	FALSE	# ACD/Labs03221914022D 9 8 0 0 0 0 0 0 0 0 1 V2000 0.0000 -1.3311 0.0000 C 0 0 0 0 0 0 0 0 0 0 0 0 1.1524 -1.9937 0.0000 C 0 0 0 0 0 0 0 0 0 0 0 0 1.1524 -3.3248 0.0000 C 0 0 0 0 0 0 0 0 0 0 0 0 2.3049 -1.3311 0.0000 C 0 0 0 0 0 0 0 0 0 0 0 0 3.4573 -1.9937 0.0000 C 0 0 0 0 0 0 0 0 0 0 0 0 4.6097 -1.3311 0.0000 C 0 0 0 0 0 0 0 0 0 0 0 0 4.6097 0.0000 0.0000 O 0 0 0 0 0 0 0 0 0 0 0 0 5.7622 -1.993…	Leucine	C6 H13 N O2	131.095	834	817
	FALSE	# ACD/Labs04221415492D 9 8 0 0 0 0 0 0 0 0 1 V2000 1.1242 -0.0742 0.0000 O 0 0 0 0 0 0 0 0 0 0 0 0 0.0000 -2.1571 0.0000 O 0 0 0 0 0 0 0 0 0 0 0 0 2.3169 -3.3555 0.0000 N 0 0 0 0 0 0 0 0 0 0 0 0 2.2713 -2.0259 0.0000 C 0 0 0 0 0 0 0 0 0 0 0 0 1.1014 -1.3981 0.0000 C 0 0 0 0 0 0 0 0 0 0 0 0 3.4012 -1.3297 0.0000 C 0 0 0 0 0 0 0 0 0 0 0 0 4.5711 -1.9574 0.0000 C 0 0 0 0 0 0 0 0 0 0 0 0 3.3612 0.000…	DL-Isoleucine	C6 H13 N O2	131.095	769	725
	FALSE	# ACD/Labs04281711232D 9 8 0 0 1 0 0 0 0 0 1 V2000 5.6901 0.0000 0.0000 O 0 0 0 0 0 0 0 0 0 0 0 0 6.8226 -1.9649 0.0000 O 0 0 0 0 0 0 0 0 0 0 0 0 4.5370 -3.4113 0.0000 N 0 0 0 0 0 0 0 0 0 0 0 0 4.5370 -1.9581 0.0000 C 0 0 0 0 0 0 0 0 0 0 0 0 5.6901 -1.3031 0.0000 C 0 0 0 0 0 0 0 0 0 0 0 0 3.3977 -1.3031 0.0000 C 0 0 0 0 0 0 0 0 0 0 0 0 2.2583 -1.9581 0.0000 C 0 0 0 0 0 0 0 0 0 0 0 0 1.0643 -1.425…	L-(+)-norleucine	C6 H13 N O2	131.095	19964	522
	FALSE	# ACD/Labs03221914022D 10 9 0 0 1 0 0 0 0 0 1 V2000 0.0000 -1.3313 0.0000 C 0 0 0 0 0 0 0 0 0 0 0 0 1.1526 -1.9941 0.0000 C 0 0 0 0 0 0 0 0 0 0 0 0 1.1526 -3.3254 0.0000 C 0 0 0 0 0 0 0 0 0 0 0 0 2.3053 -1.3313 0.0000 C 0 0 0 0 0 0 0 0 0 0 0 0 3.4579 -1.9941 0.0000 C 0 0 0 0 0 0 0 0 0 0 0 0 4.6106 -1.3313 0.0000 C 0 0 0 0 0 0 0 0 0 0 0 0 4.6106 0.0000 0.0000 O 0 0 0 0 0 0 0 0 0 0 0 0 5.7632 -1.99…	H-Leu-OH	C6 H13 N O2	131.095	388617	321
	FALSE	# ACD/Labs03221913572D 9 9 0 0 0 0 0 0 0 0 1 V2000 3.4538 0.0000 0.0000 C 0 0 0 0 0 0 0 0 0 0 0 0 4.6051 -0.6677 0.0000 C 0 0 0 0 0 0 0 0 0 0 0 0 5.7564 0.0000 0.0000 O 0 0 0 0 0 0 0 0 0 0 0 0 2.3025 -0.6677 0.0000 N 0 0 0 0 0 0 0 0 0 0 0 0 2.3025 -1.9975 0.0000 C 0 0 0 0 0 0 0 0 0 0 0 0 1.1513 -2.6594 0.0000 C 0 0 0 0 0 0 0 0 0 0 0 0 0.0000 -1.9975 0.0000 O 0 0 0 0 0 0 0 0 0 0 0 0 0.0000 -0.6677…	QE3510000	C6 H13 N O2	131.095	55110	209
	FALSE	# ACD/Labs04281711402D 9 8 0 0 1 0 0 0 0 0 1 V2000 4.6097 0.0000 0.0000 O 0 0 0 0 0 0 0 0 0 0 0 0 4.6097 -1.3311 0.0000 C 0 0 0 0 0 0 0 0 0 0 0 0 5.7622 -1.9937 0.0000 O 0 0 0 0 0 0 0 0 0 0 0 0 3.4573 -1.9937 0.0000 C 0 0 0 0 0 0 0 0 0 0 0 0 3.4573 -3.3248 0.0000 N 0 0 0 0 0 0 0 0 0 0 0 0 2.3049 -1.3311 0.0000 C 0 0 0 0 0 0 0 0 0 0 0 0 2.3049 0.0000 0.0000 C 0 0 0 0 0 0 0 0 0 0 0 0 1.1524 -1.9937…	D-allo-Isoleucine	C6 H13 N O2	131.095	85019	180
	FALSE	# ACD/Labs04281711382D 11 10 0 0 1 0 0 0 0 0 1 V2000 0.0000 -1.9931 0.0000 N 0 0 0 0 0 0 0 0 0 0 0 0 1.3318 -1.9931 0.0000 C 0 0 0 0 0 0 0 0 0 0 0 0 1.3318 -3.3249 0.0000 H 0 0 0 0 0 0 0 0 0 0 0 0 2.6590 -1.9931 0.0000 C 0 0 0 0 0 0 0 0 0 0 0 0 2.6590 -3.3249 0.0000 H 0 0 0 0 0 0 0 0 0 0 0 0 2.6590 -0.6659 0.0000 C 0 0 0 0 0 0 0 0 0 0 0 0 3.9908 -1.9931 0.0000 C 0 0 0 0 0 0 0 0 0 0 0 0 4.6567 -0.…	L-Alloisoleucine	C6 H13 N O2	131.095	89698	179
	FALSE	# ACD/Labs04281712082D 9 8 0 0 1 0 0 0 0 0 1 V2000 1.1242 -0.0742 0.0000 O 0 0 0 0 0 0 0 0 0 0 0 0 0.0000 -2.1571 0.0000 O 0 0 0 0 0 0 0 0 0 0 0 0 2.3169 -3.3555 0.0000 N 0 0 0 0 0 0 0 0 0 0 0 0 2.2713 -2.0259 0.0000 C 0 0 0 0 0 0 0 0 0 0 0 0 1.1014 -1.3981 0.0000 C 0 0 0 0 0 0 0 0 0 0 0 0 3.4012 -1.3297 0.0000 C 0 0 0 0 0 0 0 0 0 0 0 0 4.5711 -1.9574 0.0000 C 0 0 0 0 0 0 0 0 0 0 0 0 3.3612 0.000…	D-Isoleucine	C6 H13 N O2	131.095	69017	159
	FALSE	# ACD/Labs02211713302D 9 8 0 0 1 0 0 0 0 0 1 V2000 0.0000 -1.9953 0.0000 C 0 0 0 0 0 0 0 0 0 0 0 0 1.1520 -2.6588 0.0000 C 0 0 0 0 0 0 0 0 0 0 0 0 1.1520 -3.9905 0.0000 C 0 0 0 0 0 0 0 0 0 0 0 0 2.3040 -1.9953 0.0000 C 0 0 0 0 0 0 0 0 0 0 0 0 2.3040 -0.6635 0.0000 C 0 0 0 0 0 0 0 0 0 0 0 0 3.4560 0.0000 0.0000 O 0 0 0 0 0 0 0 0 0 0 0 0 1.1520 0.0000 0.0000 O 0 0 0 0 0 0 0 0 0 0 0 0 3.4560 -2.6588…	1721712	C6 H13 N O2	131.095	392093	122
	FALSE	# ACD/Labs04281711332D 9 8 0 0 0 0 0 0 0 0 1 V2000 1.1365 -0.6601 0.0000 O 0 0 0 0 0 0 0 0 0 0 0 0 0.0000 -2.6634 0.0000 O 0 0 0 0 0 0 0 0 0 0 0 0 3.4498 -1.9918 0.0000 N 0 0 0 0 0 0 0 0 0 0 0 0 2.2960 -2.6634 0.0000 C 0 0 0 0 0 0 0 0 0 0 0 0 1.1480 -1.9918 0.0000 C 0 0 0 0 0 0 0 0 0 0 0 0 4.6036 -2.6634 0.0000 C 0 0 0 0 0 0 0 0 0 0 0 0 3.4498 -0.6659 0.0000 C 0 0 0 0 0 0 0 0 0 0 0 0 5.7401 -1.99…	N,N-Diethylglycine	C6 H13 N O2	131.095	66762	114
	FALSE	# ACD/Labs06251410112D 10 9 0 0 1 0 0 0 0 0 1 V2000 0.0000 -2.3043 0.0000 N 0 0 0 0 0 0 0 0 0 0 0 0 1.3314 -2.3043 0.0000 C 0 0 0 0 0 0 0 0 0 0 0 0 1.3314 -3.6356 0.0000 H 0 0 0 0 0 0 0 0 0 0 0 0 1.3314 -0.9776 0.0000 C 0 0 0 0 0 0 0 0 0 0 0 0 2.4812 -0.3119 0.0000 C 0 0 0 0 0 0 0 0 0 0 0 0 0.1769 -0.3119 0.0000 C 0 0 0 0 0 0 0 0 0 0 0 0 2.6581 -2.3043 0.0000 C 0 0 0 0 0 0 0 0 0 0 0 0 3.3238 -1.1…	beta-Leucine	C6 H13 N O2	131.095	388796	102
	FALSE	# ACD/Labs04221415492D 9 8 0 0 1 0 0 0 0 0 1 V2000 1.1345 0.0000 0.0000 O 0 0 0 0 0 0 0 0 0 0 0 0 0.0000 -1.9366 0.0000 O 0 0 0 0 0 0 0 0 0 0 0 0 3.4665 0.0000 0.0000 N 0 0 0 0 0 0 0 0 0 0 0 0 3.4665 -1.2663 0.0000 C 0 0 0 0 0 0 0 0 0 0 0 0 2.3320 -1.9366 0.0000 C 0 0 0 0 0 0 0 0 0 0 0 0 1.1345 -1.2663 0.0000 C 0 0 0 0 0 0 0 0 0 0 0 0 4.5322 -1.9366 0.0000 C 0 0 0 0 0 0 0 0 0 0 0 0 5.7297 -1.4038…	(3R)-beta-leucine	C6 H13 N O2	131.095	2042285	98
	FALSE	#5275645 -OEChem-02070710102D 22 21 0 1 0 0 0 0 0999 V2000 6.0010 1.1900 0.0000 O 0 0 0 0 0 0 0 0 0 0 0 0 5.1350 -0.3100 0.0000 O 0 0 0 0 0 0 0 0 0 0 0 0 2.5369 1.1900 0.0000 N 0 0 0 0 0 0 0 0 0 0 0 0 3.4030 0.6900 0.0000 C 0 0 3 0 0 0 0 0 0 0 0 0 3.4030 -0.3100 0.0000 C 0 0 0 0 0 0 0 0 0 0 0 0 2.5369 -0.8100 0.0000 C 0 0 0 0 0 0 0 0 0 0 0 0 4.2690 1.1900 0.0000 C 0 0 0 0 0 0 0 0 0 0 0 0 2.5369 -…	MFCD00044473	C6 H13 N O2	131.095	4439748	52
	FALSE	# ACD/Labs04221415492D 9 8 0 0 0 0 0 0 0 0 2 V2000 0.0000 -1.9315 0.0000 O 0 5 0 0 0 0 0 0 0 0 0 0 1.1742 0.0000 0.0000 O 0 0 0 0 0 0 0 0 0 0 0 0 4.5029 -1.9139 0.0000 N 0 3 0 0 0 0 0 0 0 0 0 0 3.3875 -1.2798 0.0000 C 0 0 0 0 0 0 0 0 0 0 0 0 2.2779 -1.9198 0.0000 C 0 0 0 0 0 0 0 0 0 0 0 0 1.1683 -1.2857 0.0000 C 0 0 0 0 0 0 0 0 0 0 0 0 4.4970 -3.1996 0.0000 C 0 0 0 0 0 0 0 0 0 0 0 0 5.8708 -1.074…	beta-alanine betaine	C6 H13 N O2	131.095	390173	19
	FALSE	# ACD/Labs08121512322D 9 9 0 0 0 0 0 0 0 0 1 V2000 2.3023 0.0000 0.0000 C 0 0 0 0 0 0 0 0 0 0 0 0 2.3023 -3.9901 0.0000 C 0 0 0 0 0 0 0 0 0 0 0 0 3.4554 -3.3237 0.0000 C 0 0 0 0 0 0 0 0 0 0 0 0 2.3023 -1.3287 0.0000 C 0 0 0 0 0 0 0 0 0 0 0 0 1.1531 -3.3237 0.0000 C 0 0 0 0 0 0 0 0 0 0 0 0 1.1531 -1.9950 0.0000 C 0 0 0 0 0 0 0 0 0 0 0 0 3.4554 -1.9950 0.0000 N 0 0 0 0 0 0 0 0 0 0 0 0 0.0000 -3.990…	2-Methyl-3,4-piperidinediol	C6 H13 N O2	131.095	35014134	1
FALSE	DL-Tryptophan	C11 H12 N2 O2	Full match	Full match		204.09	7.235	2.73393e+09	12	No MS2	754847	30882.1	182611	8.4067e+08	9.99379e+08	3.15333e+08	1.51071e+08	3.78453e+08	2.83761e+08	3.26766e+08	6.01457e+08	2.14028e+08	2.28502e+08	2.08246e+09	283087	8.79125e+08	8.33347e+08	1.6137e+08	1.58987e+08	2.39597e+08	4.35383e+08	7.94841e+08	2.36229e+09	4.54948e+08	324831	9.57979e+08	9.21326e+08	3.29843e+08	3.20808e+08	4.01118e+08	2.23926e+08	1.98303e+08	2.16327e+08	3.34165e+08	8.04267e+07	299424	8.84502e+08	8.89991e+08	2.28672e+08
	Checked	Structure	Name	Formula	Molecular Weight	CSID	# References
	FALSE	# ACD/Labs03221913572D 15 16 0 0 0 0 0 0 0 0 1 V2000 0.0070 -4.1834 0.0000 C 0 0 0 0 0 0 0 0 0 0 0 0 0.0000 -5.5148 0.0000 C 0 0 0 0 0 0 0 0 0 0 0 0 1.1492 -6.1875 0.0000 C 0 0 0 0 0 0 0 0 0 0 0 0 2.3054 -5.5218 0.0000 C 0 0 0 0 0 0 0 0 0 0 0 0 2.3124 -4.1904 0.0000 C 0 0 0 0 0 0 0 0 0 0 0 0 1.1632 -3.5247 0.0000 C 0 0 0 0 0 0 0 0 0 0 0 0 3.5737 -3.7910 0.0000 C 0 0 0 0 0 0 0 0 0 0 0 0 3.9872 -2.…	DL-Tryptophan	C11 H12 N2 O2	204.09	1116	22304
	FALSE	# ACD/Labs04221415492D 15 17 0 0 0 0 0 0 0 0 1 V2000 3.4365 -1.5855 0.0000 O 0 0 0 0 0 0 0 0 0 0 0 0 3.4365 -4.2331 0.0000 O 0 0 0 0 0 0 0 0 0 0 0 0 5.7170 -0.2734 0.0000 N 0 0 0 0 0 0 0 0 0 0 0 0 6.9198 -2.1322 0.0000 N 0 0 0 0 0 0 0 0 0 0 0 0 4.5846 -2.2493 0.0000 C 0 0 0 0 0 0 0 0 0 0 0 0 2.2884 -2.2493 0.0000 C 0 0 0 0 0 0 0 0 0 0 0 0 5.7248 -1.5855 0.0000 C 0 0 0 0 0 0 0 0 0 0 0 0 2.2884 -3.…	Idazoxan	C11 H12 N2 O2	204.09	49184	1168
	FALSE	# ACD/Labs04281713412D 16 17 0 0 1 0 0 0 0 0 1 V2000 4.4918 -4.4995 0.0000 N 0 0 0 0 0 0 0 0 0 0 0 0 3.6011 -5.4823 0.0000 C 0 0 0 0 0 0 0 0 0 0 0 0 2.7104 -6.4728 0.0000 H 0 0 0 0 0 0 0 0 0 0 0 0 2.6106 -4.5993 0.0000 C 0 0 0 0 0 0 0 0 0 0 0 0 2.8870 -3.2940 0.0000 C 0 0 0 0 0 0 0 0 0 0 0 0 4.1002 -2.7488 0.0000 C 0 0 0 0 0 0 0 0 0 0 0 0 3.9620 -1.4282 0.0000 N 0 0 0 0 0 0 0 0 0 0 0 0 2.6644 -1.…	L-Tryptophan	C11 H12 N2 O2	204.09	6066	795
	FALSE	# ACD/Labs03221914022D 16 17 0 0 1 0 0 0 0 0 1 V2000 0.0070 -4.1829 0.0000 C 0 0 0 0 0 0 0 0 0 0 0 0 0.0000 -5.5141 0.0000 C 0 0 0 0 0 0 0 0 0 0 0 0 1.1491 -6.1867 0.0000 C 0 0 0 0 0 0 0 0 0 0 0 0 2.3051 -5.5211 0.0000 C 0 0 0 0 0 0 0 0 0 0 0 0 2.3121 -4.1899 0.0000 C 0 0 0 0 0 0 0 0 0 0 0 0 1.1631 -3.5243 0.0000 C 0 0 0 0 0 0 0 0 0 0 0 0 3.5733 -3.7905 0.0000 C 0 0 0 0 0 0 0 0 0 0 0 0 3.9867 -2.…	D-(+)-tryptophan	C11 H12 N2 O2	204.09	8707	242
	FALSE	# ACD/Labs06251410122D 15 16 0 0 0 0 0 0 0 0 1 V2000 0.8193 -4.9502 0.0000 O 0 0 0 0 0 0 0 0 0 0 0 0 2.1206 -4.6748 0.0000 C 0 0 0 0 0 0 0 0 0 0 0 0 3.1051 -5.5630 0.0000 C 0 0 0 0 0 0 0 0 0 0 0 0 2.9674 -6.8849 0.0000 O 0 0 0 0 0 0 0 0 0 0 0 0 4.2618 -4.8952 0.0000 C 0 0 0 0 0 0 0 0 0 0 0 0 5.4735 -5.4391 0.0000 C 0 0 0 0 0 0 0 0 0 0 0 0 3.9864 -3.5939 0.0000 N 0 0 0 0 0 0 0 0 0 0 0 0 4.8745 -2.…	MFCD00003143	C11 H12 N2 O2	204.09	89318	210
	FALSE	# ACD/Labs06161415502D 15 16 0 0 0 0 0 0 0 0 1 V2000 3.7859 -5.7974 0.0000 O 0 0 0 0 0 0 0 0 0 0 0 0 0.0000 -3.0445 0.0000 O 0 0 0 0 0 0 0 0 0 0 0 0 2.3396 -2.6738 0.0000 N 0 0 0 0 0 0 0 0 0 0 0 0 1.6772 -4.7218 0.0000 N 0 0 0 0 0 0 0 0 0 0 0 0 3.4152 -3.4578 0.0000 C 0 0 0 0 0 0 0 0 0 0 0 0 3.0081 -4.7218 0.0000 C 0 0 0 0 0 0 0 0 0 0 0 0 4.0837 -2.3031 0.0000 C 0 0 0 0 0 0 0 0 0 0 0 0 1.2640 -3.…	Nirvanol	C11 H12 N2 O2	204.09	82605	209
	FALSE	# ACD/Labs04221415492D 15 16 0 0 0 0 0 0 0 0 1 V2000 4.2400 -5.0011 0.0000 O 0 0 0 0 0 0 0 0 0 0 0 0 0.3696 -2.3483 0.0000 O 0 0 0 0 0 0 0 0 0 0 0 0 2.0947 -3.9864 0.0000 N 0 0 0 0 0 0 0 0 0 0 0 0 2.7035 -1.9207 0.0000 N 0 0 0 0 0 0 0 0 0 0 0 0 3.8052 -2.6672 0.0000 C 0 0 0 0 0 0 0 0 0 0 0 0 3.4283 -3.9429 0.0000 C 0 0 0 0 0 0 0 0 0 0 0 0 1.6525 -2.7252 0.0000 C 0 0 0 0 0 0 0 0 0 0 0 0 4.9431 -1.…	ethotoin	C11 H12 N2 O2	204.09	3176	153
	FALSE	# ACD/Labs04221415492D 15 16 0 0 0 0 0 0 0 0 1 V2000 4.6265 -1.6197 0.0000 O 0 0 0 0 0 0 0 0 0 0 0 0 3.1752 -4.7468 0.0000 O 0 0 0 0 0 0 0 0 0 0 0 0 5.2920 -3.6643 0.0000 N 0 0 0 0 0 0 0 0 0 0 0 0 6.8636 -1.7319 0.0000 N 0 0 0 0 0 0 0 0 0 0 0 0 3.5521 -2.3974 0.0000 C 0 0 0 0 0 0 0 0 0 0 0 0 3.9610 -3.6643 0.0000 C 0 0 0 0 0 0 0 0 0 0 0 0 5.7090 -2.3974 0.0000 C 0 0 0 0 0 0 0 0 0 0 0 0 2.3092 -1.…	Thozalinone	C11 H12 N2 O2	204.09	12082	74
	FALSE	# ACD/Labs04221415492D 15 16 0 0 0 0 0 0 0 0 1 V2000 4.6196 -0.6210 0.0000 O 0 0 0 0 0 0 0 0 0 0 0 0 5.0241 -4.0268 0.0000 O 0 0 0 0 0 0 0 0 0 0 0 0 3.3494 -2.3615 0.0000 N 0 0 0 0 0 0 0 0 0 0 0 0 2.2769 -0.2446 0.0000 N 0 0 0 0 0 0 0 0 0 0 0 0 5.4005 -1.6935 0.0000 C 0 0 0 0 0 0 0 0 0 0 0 0 4.6196 -2.7755 0.0000 C 0 0 0 0 0 0 0 0 0 0 0 0 3.3494 -1.0255 0.0000 C 0 0 0 0 0 0 0 0 0 0 0 0 6.7459 -1.…	Fenozolone	C11 H12 N2 O2	204.09	64736	53
	FALSE	# ACD/Labs04281713402D 27 28 0 0 1 0 0 0 0 0 1 V2000 1.4227 -1.4319 0.0000 O 0 0 0 0 0 0 0 0 0 0 0 0 7.0125 -1.4319 0.0000 O 0 0 0 0 0 0 0 0 0 0 0 0 5.0116 -3.4328 0.0000 N 0 0 0 0 0 0 0 0 0 0 0 0 4.2130 -0.9821 0.0000 N 0 0 0 0 0 0 0 0 0 0 0 0 3.4236 -3.4328 0.0000 C 0 0 0 0 0 0 0 0 0 0 0 0 1.9092 -3.9193 0.0000 C 0 0 0 0 0 0 0 0 0 0 0 0 3.4236 -5.0207 0.0000 C 0 0 0 0 0 0 0 0 0 0 0 0 2.9280 -1.…	MU2452000	C11 H12 N2 O2	204.09	5022931	35
	FALSE	# ACD/Labs04221415492D 15 17 0 0 1 0 0 0 0 0 1 V2000 7.3637 -3.7014 0.0000 O 0 0 0 0 0 0 0 0 0 0 0 0 0.0000 0.0000 0.0000 O 0 0 0 0 0 0 0 0 0 0 0 0 5.7551 -0.6794 0.0000 N 0 0 0 0 0 0 0 0 0 0 0 0 4.5994 -2.6628 0.0000 N 0 0 0 0 0 0 0 0 0 0 0 0 5.7551 -2.0069 0.0000 C 0 0 0 0 0 0 0 0 0 0 0 0 3.4593 -0.6637 0.0000 C 0 0 0 0 0 0 0 0 0 0 0 0 3.4515 -1.9991 0.0000 C 0 0 0 0 0 0 0 0 0 0 0 0 7.0201 -2.4…	Vasicinol	C11 H12 N2 O2	204.09	391237	22
	FALSE	#123963 -OEChem-02070708222D 27 28 0 1 0 0 0 0 0999 V2000 2.0000 -0.1027 0.0000 O 0 0 0 0 0 0 0 0 0 0 0 0 4.4411 2.8799 0.0000 O 0 0 0 0 0 0 0 0 0 0 0 0 4.5691 0.2063 0.0000 N 0 0 3 0 0 0 0 0 0 0 0 0 3.7601 -0.3815 0.0000 N 0 0 0 0 0 0 0 0 0 0 0 0 4.2601 1.1573 0.0000 C 0 0 0 0 0 0 0 0 0 0 0 0 3.7601 -1.3815 0.0000 C 0 0 0 0 0 0 0 0 0 0 0 0 2.9511 0.2063 0.0000 C 0 0 0 0 0 0 0 0 0 0 0 0 3.2601 1.…	5-(Hydroxymethyl)-1-methyl-2-phenyl-1,2-dihydro-3H-pyrazol-3-one	C11 H12 N2 O2	204.09	110485	21
FALSE		C20 H36 O4	Full match	No results		340.261	15.678	2.6053e+09	0	No MS2	392294	60055.3	373389	3.79986e+08	3.33546e+08	766042	338791	374013	295949	1.96958e+06	2.6053e+09	381052	536348	1.11326e+09	626295	2.01936e+08	1.49593e+08	541934	1.88234e+08	1.10644e+08	1.01067e+06	1.7492e+09	585385	627476	634975	3.11393e+08	2.62496e+08	700604	2.26432e+09	582882	672899	335922	370396	776577	523816	792859	2.75348e+08	3.16361e+08	1.39114e+09
	Checked	Structure	Name	Formula	Molecular Weight	CSID	# References
FALSE			No results	No results		160.109	11.029	2.56536e+09	0	No MS2	139952	17356.1	142211	3.33383e+08	3.34884e+08	1.32157e+07	5.27813e+06	8.20169e+06	6.89701e+06	1.13597e+07	2.47409e+09	8.30047e+06	1.05568e+07	1.49101e+09	626186	2.94501e+08	2.44072e+08	1.03838e+07	3.79164e+08	2.6212e+08	1.12063e+07	2.10155e+09	9.51814e+06	1.10492e+07	674239	3.15849e+08	3.36225e+08	1.07903e+07	2.29326e+09	2.10295e+06	9.66251e+06	7.39566e+06	7.83168e+06	1.16976e+07	8.07336e+06	465426	3.34883e+08	3.44582e+08	2.08761e+09
	Checked	Structure	Name	Formula	Molecular Weight	CSID	# References
FALSE	(−)-nabilone	C24 H36 O3	Full match	Full match		372.266	12.013	2.49511e+09	5	No MS2	218394	14446.1	222584	1.5218e+09	1.65882e+09	1.67936e+09	7.44469e+07	1.151e+09	2.1208e+08	1.28615e+08	2.49511e+09	1.05108e+09	1.17103e+09	1.95782e+09	616855	1.14846e+09	1.03075e+09	9.04957e+07	1.92873e+09	1.30496e+09	1.99639e+09	2.03755e+09	1.19214e+06	1.64584e+09	687973	1.48209e+09	1.39276e+09	1.80254e+09	2.23805e+09	5.58541e+06	1.31189e+09	9.09357e+07	2.28837e+07	1.96937e+09	630006	774551	1.59045e+09	1.34107e+09	2.16755e+09
	Checked	Structure	Name	Formula	Molecular Weight	CSID	# References
	FALSE	# ACD/Labs04221415492D 29 31 0 0 1 0 0 0 0 0 1 V2000 2.6254 -5.8482 0.0000 O 0 0 0 0 0 0 0 0 0 0 0 0 4.8758 -1.9448 0.0000 O 0 0 0 0 0 0 0 0 0 0 0 0 1.5002 0.0000 0.0000 O 0 0 0 0 0 0 0 0 0 0 0 0 2.6254 -3.2505 0.0000 C 0 0 0 0 0 0 0 0 0 0 0 0 1.4864 -3.8895 0.0000 C 0 0 0 0 0 0 0 0 0 0 0 0 3.7367 -3.8895 0.0000 C 0 0 0 0 0 0 0 0 0 0 0 0 1.4864 -5.2092 0.0000 C 0 0 0 0 0 0 0 0 0 0 0 0 3.7367 -5.2…	(−)-nabilone	C24 H36 O3	372.266	4447641	74
	FALSE	# ACD/Labs04281710582D 30 33 0 0 1 0 0 0 0 0 1 V2000 7.8878 -1.3045 0.0000 O 0 0 0 0 0 0 0 0 0 0 0 0 7.8979 0.0000 0.0000 O 0 0 0 0 0 0 0 0 0 0 0 0 9.0103 -3.2562 0.0000 O 0 0 0 0 0 0 0 0 0 0 0 0 5.6327 -3.9135 0.0000 C 0 0 0 0 0 0 0 0 0 0 0 0 4.5102 -4.5608 0.0000 C 0 0 0 0 0 0 0 0 0 0 0 0 5.6327 -2.6090 0.0000 C 0 0 0 0 0 0 0 0 0 0 0 0 3.3776 -3.9135 0.0000 C 0 0 0 0 0 0 0 0 0 0 0 0 6.7653 -1.9…	ANAGESTONE ACETATE	C24 H36 O3	372.266	221058	17
	FALSE	# SciTegic04031415222D 27 26 0 0 0 0 0 0 0 0999 V2000 0.0000 -2.0522 0.0000 C 0 0 0 0 0 0 0 0 0 0 0 0 1.1897 -1.3681 0.0000 C 0 0 0 0 0 0 0 0 0 0 0 0 2.3793 -2.0522 0.0000 C 0 0 0 0 0 0 0 0 0 0 0 0 3.5690 -2.0522 0.0000 C 0 0 0 0 0 0 0 0 0 0 0 0 4.7587 -1.3681 0.0000 C 0 0 0 0 0 0 0 0 0 0 0 0 5.9483 -2.0522 0.0000 C 0 0 0 0 0 0 0 0 0 0 0 0 7.1380 -2.0522 0.0000 C 0 0 0 0 0 0 0 0 0 0 0 0 8.3277 -1…	Cervonoyl ethanolamide	C24 H36 O3	372.266	30776716	8
	FALSE	# ACD/Labs04221415492D 30 33 0 0 1 0 0 0 0 0 1 V2000 10.0975 -2.0006 0.0000 O 0 0 0 0 0 0 0 0 0 0 0 0 2.2709 -7.8536 0.0000 O 0 0 0 0 0 0 0 0 0 0 0 0 11.2600 0.0000 0.0000 O 0 0 0 0 0 0 0 0 0 0 0 0 7.8536 -5.8936 0.0000 C 0 0 0 0 0 0 0 0 0 0 0 0 8.9620 -5.2583 0.0000 C 0 0 0 0 0 0 0 0 0 0 0 0 6.7452 -5.2583 0.0000 C 0 0 0 0 0 0 0 0 0 0 0 0 8.9755 -3.9606 0.0000 C 0 0 0 0 0 0 0 0 0 0 0 0 5.6367 -5…	3-Ethoxyandrosta-3,5-dien-17beta-ol propanoate	C24 H36 O3	372.266	220684	7
	FALSE	# ACD/Labs08121512372D 27 28 0 0 0 0 0 0 0 0 1 V2000 0.0000 0.0000 0.0000 C 0 0 0 0 0 0 0 0 0 0 0 0 1.1525 -0.6735 0.0000 C 0 0 0 0 0 0 0 0 0 0 0 0 2.3049 0.0000 0.0000 C 0 0 0 0 0 0 0 0 0 0 0 0 3.4574 -0.6735 0.0000 C 0 0 0 0 0 0 0 0 0 0 0 0 4.6099 0.0000 0.0000 C 0 0 0 0 0 0 0 0 0 0 0 0 5.7624 -0.6735 0.0000 C 0 0 0 0 0 0 0 0 0 0 0 0 6.9148 0.0000 0.0000 C 0 0 0 0 0 0 0 0 0 0 0 0 8.0523 -0.6735…	8-Hydroxy-3-[(6E)-6-pentadecen-1-yl]-3,4-dihydro-1H-isochromen-1-one	C24 H36 O3	372.266	35015148	4
FALSE	Pregabalin	C8 H17 N O2	Full match	Full match		159.126	1.363	2.35425e+09	2	No MS2	14251.8	16577.5	17076.3	7.20309e+07	7.5527e+07	7.61507e+06	3.4269e+06	3.12893e+06	1.11735e+08	1.58368e+07	4.55317e+06	9.60945e+07	7.7826e+06	2.92554e+07	111979	4.89738e+07	3.82296e+07	1.04469e+08	3.79004e+06	2.96989e+06	1.88879e+08	6.73275e+06	2.80565e+07	1.79871e+08	120588	6.48363e+07	6.34249e+07	1.5202e+07	6.15896e+06	2.35425e+09	1.32484e+08	2.18222e+07	8.96514e+06	5.4857e+06	2.59626e+08	122883	6.39896e+07	6.72362e+07	5.15923e+06
	Checked	Structure	Name	Formula	Molecular Weight	CSID	# References
	FALSE	# ACD/Labs04281710492D 11 10 0 0 1 0 0 0 0 0 1 V2000 0.0000 -2.0279 0.0000 O 0 0 0 0 0 0 0 0 0 0 0 0 1.1098 0.0000 0.0000 O 0 0 0 0 0 0 0 0 0 0 0 0 0.0581 -3.3236 0.0000 N 0 0 0 0 0 0 0 0 0 0 0 0 2.3358 -3.2539 0.0000 C 0 0 0 0 0 0 0 0 0 0 0 0 2.3416 -1.9233 0.0000 C 0 0 0 0 0 0 0 0 0 0 0 0 1.1040 -1.3132 0.0000 C 0 0 0 0 0 0 0 0 0 0 0 0 3.5154 -3.8756 0.0000 C 0 0 0 0 0 0 0 0 0 0 0 0 1.2202 -3.9…	Pregabalin	C8 H17 N O2	159.126	4589156	1783
	FALSE	# ACD/Labs04111411492D 11 10 0 0 0 0 0 0 0 0 1 V2000 8.0510 -1.3188 0.0000 C 0 0 0 0 0 0 0 0 0 0 0 0 8.0510 0.0000 0.0000 O 0 0 0 0 0 0 0 0 0 0 0 0 9.2222 -2.0012 0.0000 O 0 0 0 0 0 0 0 0 0 0 0 0 6.9443 -2.0012 0.0000 C 0 0 0 0 0 0 0 0 0 0 0 0 5.7823 -1.3188 0.0000 C 0 0 0 0 0 0 0 0 0 0 0 0 1.1712 -1.3188 0.0000 C 0 0 0 0 0 0 0 0 0 0 0 0 2.3056 -1.9643 0.0000 C 0 0 0 0 0 0 0 0 0 0 0 0 4.6388 -2.0…	RH0365500	C8 H17 N O2	159.126	62727	167
FALSE			No results	No results		90.0301	1.744	2.10463e+09	0	No MS2	102691	180729	871805	5.00661e+08	2.00567e+08	1.17678e+07	1.05122e+07	9.62145e+06	9.51759e+06	1.28108e+07	4.9969e+08	1.4499e+07	1.28106e+07	1.23779e+07	1.34778e+07	1.31786e+08	1.39386e+08	9.12169e+06	1.59224e+07	1.56024e+07	2.29955e+07	7.79325e+07	4.03616e+08	1.24991e+07	1.63676e+07	3.91322e+08	2.47806e+08	1.21283e+07	8.0567e+07	1.91588e+07	1.54943e+07	1.63167e+07	1.43008e+07	2.22299e+07	2.52262e+07	2.05989e+07	4.06616e+08	3.96268e+08	6.32314e+07
	Checked	Structure	Name	Formula	Molecular Weight	CSID	# References
FALSE	3-(4-Methyl-3-pentenyl)thiophene	C10 H14 S	No results	Full match		166.082	5.082	2.02332e+09	1	No MS2	1.92271e+06	76621.3	410799	1.43754e+09	1.48317e+09	9.20825e+08	8.54977e+08	3.34837e+08	9.08355e+08	1.1761e+09	2.02332e+09	1.07625e+09	4.2847e+08	1.47507e+09	589113	1.22044e+09	1.17801e+09	9.44113e+08	1.1659e+09	7.979e+08	1.66434e+09	1.81316e+09	1.87984e+09	1.51884e+09	702873	1.43898e+09	1.40748e+09	2.8971e+08	1.72624e+09	3.49456e+08	1.14711e+09	8.73499e+08	3.61606e+08	3.85357e+08	1.0116e+09	634099	1.28192e+09	1.32234e+09	1.60344e+09
	Checked	Structure	Name	Formula	Molecular Weight	CSID	# References
	FALSE	#566107 -OEChem-02070708272D 25 25 0 0 0 0 0 0 0999 V2000 2.8090 -1.8784 0.0000 S 0 0 0 0 0 0 0 0 0 0 0 0 3.8968 0.4694 0.0000 C 0 0 0 0 0 0 0 0 0 0 0 0 4.8913 0.3649 0.0000 C 0 0 0 0 0 0 0 0 0 0 0 0 3.3090 -0.3396 0.0000 C 0 0 0 0 0 0 0 0 0 0 0 0 5.4791 1.1739 0.0000 C 0 0 0 0 0 0 0 0 0 0 0 0 6.4736 1.0694 0.0000 C 0 0 0 0 0 0 0 0 0 0 0 0 2.3090 -0.3396 0.0000 C 0 0 0 0 0 0 0 0 0 0 0 0 3.6180 -1…	3-(4-Methyl-3-pentenyl)thiophene	C10 H14 S	166.082	492107	13
FALSE			No results	No results		164.067	1.36	2.01437e+09	0	No MS2	48317.9	42004.8	410393	1.40778e+08	1.38701e+08	4.69288e+07	1.82533e+07	2.2965e+07	1.73362e+07	2.93536e+07	2.01437e+09	1.85812e+07	3.99443e+07	3.19655e+08	469609	1.06417e+08	7.98082e+07	1.0495e+07	8.70667e+07	1.54179e+08	3.10421e+07	8.07645e+08	3.26818e+07	2.47299e+07	529078	1.18374e+08	1.16136e+08	4.26895e+07	1.68744e+09	4.17303e+06	1.26195e+07	1.81809e+07	1.19243e+07	2.75574e+07	2.89149e+07	514281	1.12778e+08	1.09387e+08	6.30648e+08
	Checked	Structure	Name	Formula	Molecular Weight	CSID	# References
FALSE		C10 H9 N O2 S	Full match	No results		207.035	11.515	2.00761e+09	0	No MS2	269313	28603.6	269947	2.03229e+08	2.28611e+08	518107	378808	463350	399785	1.14262e+06	1.88597e+09	457421	853360	1.40134e+09	564031	2.07184e+08	2.13678e+08	563031	2.29609e+08	7.37055e+07	1.14008e+06	1.97018e+09	459621	511557	751655	2.41393e+08	2.14059e+08	602624	1.19023e+09	596788	490432	391882	447271	633196	450229	811006	2.33627e+08	2.32433e+08	2.00761e+09
	Checked	Structure	Name	Formula	Molecular Weight	CSID	# References
FALSE		C5 H13 N O	Full match	No results		103.1	0.98	1.9936e+09	0	No MS2	11654.1	12025.2	14425.7	5.52568e+08	5.91154e+08	2.75261e+08	2.06164e+08	2.42661e+08	5.71516e+08	6.6978e+08	1.12138e+09	1.11376e+08	2.52713e+08	7.93466e+08	82067.8	4.43286e+08	3.73995e+08	3.17791e+08	6.74561e+08	3.13312e+08	2.08408e+08	1.11878e+09	1.17143e+08	2.06406e+08	87625.7	5.65181e+08	5.1623e+08	2.42699e+08	6.94954e+08	1.17443e+08	2.06281e+08	1.36181e+08	2.40904e+08	4.24411e+08	1.37593e+08	93826.5	5.51609e+08	5.36953e+08	9.96325e+08
	Checked	Structure	Name	Formula	Molecular Weight	CSID	# References
FALSE			No results	No results		148.036	1.539	1.93954e+09	0	No MS2	33111.8	29684.6	294325	4.48329e+08	4.88316e+08	5.7614e+07	2.49108e+07	2.78243e+07	5.10471e+07	7.59253e+07	8.77264e+07	5.53981e+07	1.46448e+07	8.96207e+07	306473	4.53598e+08	3.58932e+08	3.82395e+07	4.93056e+07	1.67275e+07	7.13041e+07	7.7139e+07	1.53605e+09	6.14834e+07	347608	4.79453e+08	4.73769e+08	6.22372e+07	8.77572e+07	2.33782e+08	6.87366e+07	4.20745e+07	2.61205e+07	3.5013e+07	8.38309e+07	359497	4.4682e+08	4.43412e+08	7.16761e+07
	Checked	Structure	Name	Formula	Molecular Weight	CSID	# References
FALSE	Xanthine	C5 H4 N4 O2	Full match	Full match		152.033	1.864	1.91322e+09	3	No MS2	17108.8	18133.6	20659.6	6.75065e+08	6.95904e+08	4.07497e+08	2.23412e+08	4.41414e+08	6.41747e+08	2.73783e+08	1.17165e+08	3.98968e+08	5.1423e+08	2.33754e+08	100076	5.03986e+08	4.89455e+08	3.42e+08	2.31137e+08	1.47122e+08	7.08546e+08	1.46373e+08	2.94105e+08	5.81743e+08	114510	5.2347e+08	5.4928e+08	4.00893e+08	3.51776e+08	1.91322e+09	4.75509e+08	3.53715e+08	2.9879e+08	8.17421e+08	1.08192e+09	115534	4.70001e+08	4.85423e+08	1.90485e+08
	Checked	Structure	Name	Formula	Molecular Weight	CSID	# References
	FALSE	# ACD/Labs04281711452D 11 12 0 0 0 0 0 0 0 0 1 V2000 3.2078 0.0000 0.0000 O 0 0 0 0 0 0 0 0 0 0 0 0 5.5498 -3.9459 0.0000 O 0 0 0 0 0 0 0 0 0 0 0 0 3.2078 -4.0125 0.0000 N 0 0 0 0 0 0 0 0 0 0 0 0 4.3455 -2.0090 0.0000 N 0 0 0 0 0 0 0 0 0 0 0 0 0.8047 -1.6039 0.0000 N 0 0 0 0 0 0 0 0 0 0 0 0 0.8047 -3.7461 0.0000 N 0 0 0 0 0 0 0 0 0 0 0 0 2.0035 -2.0090 0.0000 C 0 0 0 0 0 0 0 0 0 0 0 0 2.0035 -3.3…	Xanthine	C5 H4 N4 O2	152.033	1151	7651
	FALSE	# ACD/Labs04281710332D 11 12 0 0 0 0 0 0 0 0 1 V2000 0.0000 0.0000 0.0000 O 0 0 0 0 0 0 0 0 0 0 0 0 1.1501 -0.6658 0.0000 C 0 0 0 0 0 0 0 0 0 0 0 0 1.1501 -1.9920 0.0000 N 0 0 0 0 0 0 0 0 0 0 0 0 2.3057 -2.6579 0.0000 C 0 0 0 0 0 0 0 0 0 0 0 0 2.3057 -3.9896 0.0000 O 0 0 0 0 0 0 0 0 0 0 0 0 3.4558 -1.9920 0.0000 C 0 0 0 0 0 0 0 0 0 0 0 0 4.7214 -2.4047 0.0000 C 0 0 0 0 0 0 0 0 0 0 0 0 5.5028 -1.3…	Oxypurinol	C5 H4 N4 O2	152.033	4483	473
	FALSE	# ACD/Labs06251410132D 11 12 0 0 0 0 0 0 0 0 1 V2000 5.6815 -1.3295 0.0000 O 0 0 0 0 0 0 0 0 0 0 0 0 4.3520 -1.3295 0.0000 C 0 0 0 0 0 0 0 0 0 0 0 0 3.5680 -2.4033 0.0000 N 0 0 0 0 0 0 0 0 0 0 0 0 2.3067 -1.9942 0.0000 C 0 0 0 0 0 0 0 0 0 0 0 0 2.3067 -0.6647 0.0000 C 0 0 0 0 0 0 0 0 0 0 0 0 3.5680 -0.2500 0.0000 N 0 0 0 0 0 0 0 0 0 0 0 0 1.1533 0.0000 0.0000 N 0 0 0 0 0 0 0 0 0 0 0 0 0.0000 -0.6…	7H-Purine-6,8-diol	C5 H4 N4 O2	152.033	75117	86
FALSE			No results	No results		140.951	1.879	1.88181e+09	0	No MS2	132315	130446	137158	7.25339e+07	1.14672e+07	7.79948e+06	5.87e+06	5.84215e+07	4.99951e+07	7.87569e+06	1.04382e+07	5.46189e+07	7.12198e+07	6.69182e+07	7.49005e+07	5.43547e+07	5.07187e+07	5.52546e+07	5.33883e+06	4.24858e+07	7.60229e+06	9.15835e+07	1.20362e+07	8.09077e+07	9.36923e+07	7.92952e+06	7.97045e+06	6.09393e+07	1.20301e+07	4.93799e+07	7.50885e+07	6.4446e+06	4.69652e+07	9.5488e+06	6.45912e+07	5.80666e+07	7.51348e+07	1.1603e+07	7.75263e+06
	Checked	Structure	Name	Formula	Molecular Weight	CSID	# References
FALSE		C8 H12 O8 S4	Full match	No results		363.941	6.78	1.88101e+09	0	No MS2	358029	29381.4	279510	407061	361589	369421	268989	330237	292065	338545	404954	320836	351632	336605	337608	328539	316331	331387	351323	359176	374224	414353	1.36564e+06	345064	372611	383194	367865	338108	437118	1.88101e+09	356334	297653	332579	460941	1.92051e+07	351329	363798	356998	393044
	Checked	Structure	Name	Formula	Molecular Weight	CSID	# References
FALSE	(1S,2R,5S)-2-Isopropyl-5-methylcyclohexyl 3-oxobutanoate	C14 H24 O3	Full match	Full match		240.172	12.713	1.8627e+09	1	No MS2	257814	29065.5	218398	3.99306e+08	4.07913e+08	500764	347388	400247	344246	543084	1.8627e+09	377543	588701	1.1723e+09	416156	2.55105e+08	2.24461e+08	470167	3.87007e+08	1.52169e+08	1.01831e+06	1.49173e+09	467857	474245	442794	3.79971e+08	2.95068e+08	479503	1.56674e+09	489360	471703	383568	418381	550042	414052	430856	3.21968e+08	3.36016e+08	1.53611e+09
	Checked	Structure	Name	Formula	Molecular Weight	CSID	# References
	FALSE	#43045 -OEChem-02070708212D 41 41 0 1 0 0 0 0 0999 V2000 4.5981 0.0000 0.0000 O 0 0 0 0 0 0 0 0 0 0 0 0 6.3301 0.0000 0.0000 O 0 0 0 0 0 0 0 0 0 0 0 0 7.1962 1.5000 0.0000 O 0 0 0 0 0 0 0 0 0 0 0 0 3.7321 -1.5000 0.0000 C 0 0 2 0 0 0 0 0 0 0 0 0 4.5981 -1.0000 0.0000 C 0 0 2 0 0 0 0 0 0 0 0 0 3.7321 -2.5000 0.0000 C 0 0 0 0 0 0 0 0 0 0 0 0 5.4641 -2.5000 0.0000 C 0 0 2 0 0 0 0 0 0 0 0 0 5.4641 -1…	(1S,2R,5S)-2-Isopropyl-5-methylcyclohexyl 3-oxobutanoate	C14 H24 O3	240.173	39229	11
FALSE	(1S,6S)-6-Aminooctahydro-1-indolizinyl acetate	C10 H18 N2 O2	Full match	Full match		198.137	5.099	1.83527e+09	1	No MS2	2.213e+06	52998.3	54199.5	2.33535e+08	2.38137e+08	4.74423e+08	2.12866e+08	4.41065e+08	1.30461e+08	4.74768e+08	2.68524e+07	8.33621e+07	6.73841e+08	1.73275e+07	252371	1.57021e+08	1.39048e+08	2.58278e+08	1.32642e+08	3.39154e+08	7.58642e+07	1.24635e+07	9.92026e+07	1.4974e+08	271643	2.4534e+08	2.20266e+08	6.2514e+08	2.01864e+08	4.29926e+06	2.4794e+08	3.057e+08	5.5999e+08	7.02148e+08	2.96769e+07	278400	1.86134e+08	2.03308e+08	1.15696e+07
	Checked	Structure	Name	Formula	Molecular Weight	CSID	# References
	FALSE	# ACD/Labs04221415492D 14 15 0 0 1 0 0 0 0 0 1 V2000 5.0646 -2.0096 0.0000 O 0 0 0 0 0 0 0 0 0 0 0 0 6.2056 0.0000 0.0000 O 0 0 0 0 0 0 0 0 0 0 0 0 3.4524 -5.0278 0.0000 N 0 0 0 0 0 0 0 0 0 0 0 0 0.0000 -5.6903 0.0000 N 0 0 0 0 0 0 0 0 0 0 0 0 3.4598 -3.7027 0.0000 C 0 0 0 0 0 0 0 0 0 0 0 0 4.7259 -3.3052 0.0000 C 0 0 0 0 0 0 0 0 0 0 0 0 4.7112 -5.4473 0.0000 C 0 0 0 0 0 0 0 0 0 0 0 0 5.5062 -4.3…	(1S,6S)-6-Aminooctahydro-1-indolizinyl acetate	C10 H18 N2 O2	198.137	29368600	3
FALSE	1,1-Diethyl-3-oxo-2-triazanolate	C4 H10 N3 O2	No results	Full match		132.077	9.188	1.78967e+09	1	No MS2	176998	19085.3	186222	4.11047e+08	3.8982e+08	2.35463e+06	9.83185e+06	6.7504e+06	1.2522e+07	1.00363e+08	1.47203e+08	6.23611e+07	3.45655e+06	9.59796e+07	259631	3.15199e+08	2.73994e+08	1.1698e+06	1.4908e+07	2.30322e+07	6.54015e+07	1.17654e+08	1.71468e+09	9.0423e+07	275656	3.99491e+08	3.74908e+08	4.47823e+06	1.43441e+08	1.96078e+07	1.34068e+07	8.82179e+06	1.58064e+06	2.41589e+06	8.42596e+08	281834	3.7954e+08	3.81268e+08	7.12951e+07
	Checked	Structure	Name	Formula	Molecular Weight	CSID	# References
	FALSE	# ACD/Labs04111411492D 9 8 0 0 0 0 0 0 0 0 2 V2000 0.0000 -1.9971 0.0000 C 0 0 0 0 0 0 0 0 0 0 0 0 1.1511 -1.3295 0.0000 C 0 0 0 0 0 0 0 0 0 0 0 0 2.3021 -1.9971 0.0000 N 0 0 0 0 0 0 0 0 0 0 0 0 2.3021 -3.3266 0.0000 C 0 0 0 0 0 0 0 0 0 0 0 0 3.4532 -3.9884 0.0000 C 0 0 0 0 0 0 0 0 0 0 0 0 3.4532 -1.3295 0.0000 N 0 0 0 0 0 0 0 0 0 0 0 0 4.6042 -1.9971 0.0000 N 0 0 0 0 0 0 0 0 0 0 0 0 5.7553 -1.32…	1,1-Diethyl-3-oxo-2-triazanolate	C4 H10 N3 O2	132.077	96916	38
FALSE			No results	No results		91.9917	6.78	1.77428e+09	0	No MS2	408442	33518.6	318867	4.09835e+06	3.69543e+06	421438	306864	376737	338975	386215	461974	366013	401144	384002	385146	2.93282e+06	2.54036e+06	378049	400792	409751	426918	472697	1.94804e+07	393652	425078	4.04857e+06	3.55997e+06	385716	877184	1.77428e+09	434539	339564	379409	525846	7.90853e+07	400799	3.61761e+06	3.14411e+06	448388
	Checked	Structure	Name	Formula	Molecular Weight	CSID	# References
FALSE		C18 H34 N2 O	Full match	No results		294.267	11.431	1.76965e+09	0	No MS2	158654	11266.8	175814	1.33154e+08	1.46283e+08	354677	447708	570879	297947	791037	1.76965e+09	376184	670741	1.14302e+09	245377	7.99399e+07	7.13005e+07	386355	8.11881e+07	2.26897e+07	825760	1.33738e+09	237179	255765	351465	1.3152e+08	1.09788e+08	393679	1.21608e+09	248555	207617	152335	205222	254108	398096	407209	1.09403e+08	9.79745e+07	1.27156e+09
	Checked	Structure	Name	Formula	Molecular Weight	CSID	# References
FALSE		C25 H42 O7	Full match	No results		454.293	12.012	1.76209e+09	0	No MS2	111975	21437.4	115436	1.31788e+09	1.24918e+09	1.33921e+09	8.24358e+07	8.59433e+08	2.08035e+08	1.62719e+08	1.39061e+09	9.90873e+08	1.09855e+09	1.10117e+09	583508	9.63711e+08	8.26301e+08	9.1191e+07	1.32476e+09	1.49035e+09	1.44265e+09	1.4915e+09	1.38162e+06	1.33499e+09	885267	1.20341e+09	1.08165e+09	1.39978e+09	1.64233e+09	3.71369e+06	1.12343e+09	1.12889e+08	2.00309e+07	1.53091e+09	748852	887365	1.13982e+09	1.18293e+09	1.4168e+09
	Checked	Structure	Name	Formula	Molecular Weight	CSID	# References
FALSE	2361	C10 H18 O2	Full match	Full match		170.13	0.607	1.75508e+09	59	No MS2	35507.1	39220	40370	1.2962e+07	9.70729e+06	3.29225e+07	2.10177e+07	5.84413e+06	1.03202e+08	1.08362e+09	1.45884e+07	4.69069e+07	3.81665e+08	1.9758e+07	2.03766e+07	2.43575e+07	2.41168e+07	6.77128e+07	8.9602e+07	1.62425e+07	1.75508e+09	1.23398e+07	1.20127e+07	3.13278e+07	2.13278e+08	2.05875e+07	6.98809e+07	2.67035e+08	7.13079e+06	400343	7.16705e+06	1.1745e+07	1.2011e+07	2.04915e+07	5.22142e+06	2.34983e+07	3.1877e+07	2.10914e+07	1.36033e+07
	Checked	Structure	Name	Formula	Molecular Weight	CSID	# References
	FALSE	# ACD/Labs06251410122D 12 12 0 0 0 0 0 0 0 0 1 V2000 7.9758 -3.4535 0.0000 O 0 0 0 0 0 0 0 0 0 0 0 0 7.3138 -2.3050 0.0000 C 0 0 0 0 0 0 0 0 0 0 0 0 7.9758 -1.1485 0.0000 C 0 0 0 0 0 0 0 0 0 0 0 0 7.3138 0.0000 0.0000 C 0 0 0 0 0 0 0 0 0 0 0 0 5.9818 0.0000 0.0000 C 0 0 0 0 0 0 0 0 0 0 0 0 5.3199 -1.1485 0.0000 C 0 0 0 0 0 0 0 0 0 0 0 0 3.9879 -1.1485 0.0000 C 0 0 0 0 0 0 0 0 0 0 0 0 3.3259 -2.30…	2361	C10 H18 O2	170.131	12282	180
	FALSE	# ACD/Labs06251410122D 12 12 0 0 0 0 0 0 0 0 1 V2000 1.8521 -10.1765 0.0000 O 0 0 0 0 0 0 0 0 0 0 0 0 1.4349 -8.9146 0.0000 C 0 0 0 0 0 0 0 0 0 0 0 0 2.2185 -7.8359 0.0000 O 0 0 0 0 0 0 0 0 0 0 0 0 1.4349 -6.7572 0.0000 C 0 0 0 0 0 0 0 0 0 0 0 0 1.8521 -5.4953 0.0000 C 0 0 0 0 0 0 0 0 0 0 0 0 0.9566 -4.5082 0.0000 C 0 0 0 0 0 0 0 0 0 0 0 0 1.3738 -3.2463 0.0000 C 0 0 0 0 0 0 0 0 0 0 0 0 0.4783 -2…	.gamma.-Decalactone	C10 H18 O2	170.131	12285	170
	FALSE	# ACD/Labs04281711212D 12 11 0 0 0 0 0 0 0 0 1 V2000 10.3593 0.0000 0.0000 O 0 0 0 0 0 0 0 0 0 0 0 0 10.3593 -1.3237 0.0000 C 0 0 0 0 0 0 0 0 0 0 0 0 11.5104 -1.9913 0.0000 O 0 0 0 0 0 0 0 0 0 0 0 0 9.2083 -1.9913 0.0000 C 0 0 0 0 0 0 0 0 0 0 0 0 8.0573 -1.3237 0.0000 C 0 0 0 0 0 0 0 0 0 0 0 0 6.9062 -1.9913 0.0000 C 0 0 0 0 0 0 0 0 0 0 0 0 5.7552 -1.3237 0.0000 C 0 0 0 0 0 0 0 0 0 0 0 0 4.6041 -…	(2E)-decenoic acid	C10 H18 O2	170.131	4445851	154
	FALSE	# ACD/Labs04281712162D 12 11 0 0 0 0 0 0 0 0 1 V2000 0.0000 -10.3593 0.0000 O 0 0 0 0 0 0 0 0 0 0 0 0 1.3237 -10.3593 0.0000 C 0 0 0 0 0 0 0 0 0 0 0 0 1.9913 -11.5104 0.0000 O 0 0 0 0 0 0 0 0 0 0 0 0 1.9913 -9.2083 0.0000 C 0 0 0 0 0 0 0 0 0 0 0 0 1.3237 -8.0573 0.0000 C 0 0 0 0 0 0 0 0 0 0 0 0 1.9913 -6.9062 0.0000 C 0 0 0 0 0 0 0 0 0 0 0 0 1.3237 -5.7552 0.0000 C 0 0 0 0 0 0 0 0 0 0 0 0 1.9913 …	3660	C10 H18 O2	170.131	55635	140
	FALSE	# ACD/Labs04221415492D 12 11 0 0 0 0 0 0 0 0 1 V2000 9.2098 -1.9893 0.0000 O 0 0 0 0 0 0 0 0 0 0 0 0 8.0585 0.0000 0.0000 O 0 0 0 0 0 0 0 0 0 0 0 0 5.7561 -1.3262 0.0000 C 0 0 0 0 0 0 0 0 0 0 0 0 6.9073 -1.9985 0.0000 C 0 0 0 0 0 0 0 0 0 0 0 0 8.0585 -1.3262 0.0000 C 0 0 0 0 0 0 0 0 0 0 0 0 4.5957 -1.9985 0.0000 C 0 0 0 0 0 0 0 0 0 0 0 0 3.4537 -1.3446 0.0000 C 0 0 0 0 0 0 0 0 0 0 0 0 2.3024 -2.0…	RH3230000	C10 H18 O2	170.131	9973	126
	FALSE	# ACD/Labs04281711072D 30 29 0 0 0 0 0 0 0 0 1 V2000 6.9593 -3.5491 0.0000 O 0 0 0 0 0 0 0 0 0 0 0 0 5.4625 -6.1569 0.0000 O 0 0 0 0 0 0 0 0 0 0 0 0 3.9503 -3.5491 0.0000 C 0 0 0 0 0 0 0 0 0 0 0 0 2.4381 -4.4132 0.0000 C 0 0 0 0 0 0 0 0 0 0 0 0 9.9683 -3.5491 0.0000 C 0 0 0 0 0 0 0 0 0 0 0 0 8.4715 -4.4132 0.0000 C 0 0 0 0 0 0 0 0 0 0 0 0 5.4625 -4.4132 0.0000 C 0 0 0 0 0 0 0 0 0 0 0 0 11.4805 -4…	3402	C10 H18 O2	170.131	4509328	122
	FALSE	# ACD/Labs04221415492D 12 12 0 0 0 0 0 0 0 0 1 V2000 5.7730 -0.4849 0.0000 O 0 0 0 0 0 0 0 0 0 0 0 0 0.0000 -1.1604 0.0000 O 0 0 0 0 0 0 0 0 0 0 0 0 3.4523 -1.8243 0.0000 C 0 0 0 0 0 0 0 0 0 0 0 0 4.6242 -1.1488 0.0000 C 0 0 0 0 0 0 0 0 0 0 0 0 1.1488 -1.8243 0.0000 C 0 0 0 0 0 0 0 0 0 0 0 0 2.3034 -1.1604 0.0000 C 0 0 0 0 0 0 0 0 0 0 0 0 1.1488 -3.1521 0.0000 C 0 0 0 0 0 0 0 0 0 0 0 0 3.4523 -3.…	Sobrerol	C10 H18 O2	170.131	82589	107
	FALSE	# ACD/Labs04281711232D 12 11 0 0 0 0 0 0 0 0 1 V2000 0.0000 -1.3237 0.0000 C 0 0 0 0 0 0 0 0 0 0 0 0 1.1510 -1.9913 0.0000 C 0 0 0 0 0 0 0 0 0 0 0 0 2.3021 -1.3237 0.0000 C 0 0 0 0 0 0 0 0 0 0 0 0 3.4531 -1.9913 0.0000 C 0 0 0 0 0 0 0 0 0 0 0 0 4.6041 -1.3237 0.0000 C 0 0 0 0 0 0 0 0 0 0 0 0 5.7552 -1.9913 0.0000 C 0 0 0 0 0 0 0 0 0 0 0 0 6.9062 -1.3237 0.0000 C 0 0 0 0 0 0 0 0 0 0 0 0 6.9062 0.0…	2031	C10 H18 O2	170.131	8540	106
	FALSE	# CDK 04291007032D 12 11 0 0 0 0 999 V2000 2.9980 2.5559 0.0000 C 0 0 0 0 0 0 0 0 0 0 0 0 3.7125 2.1434 0.0000 C 0 0 0 0 0 0 0 0 0 0 0 0 4.4270 2.5559 0.0000 C 0 0 0 0 0 0 0 0 0 0 0 0 5.1414 2.1434 0.0000 C 0 0 0 0 0 0 0 0 0 0 0 0 5.8559 2.5559 0.0000 C 0 0 0 0 0 0 0 0 0 0 0 0 6.5704 2.1434 0.0000 C 0 0 0 0 0 0 0 0 0 0 0 0 7.2849 2.5559 0.0000 O 0 0 0 0 0 0 0 0 0 0 0 0 7.9993 2.1434 0.0000 C 0 0 …	1-Octen-3-yl acetate	C10 H18 O2	170.131	16205	98
	FALSE	# ACD/Labs04281711072D 30 30 0 0 0 0 0 0 0 0 1 V2000 2.5430 -6.2352 0.0000 O 0 0 0 0 0 0 0 0 0 0 0 0 5.5261 -6.2352 0.0000 O 0 0 0 0 0 0 0 0 0 0 0 0 2.5430 -7.9590 0.0000 C 0 0 0 0 0 0 0 0 0 0 0 0 1.0514 -8.8270 0.0000 C 0 0 0 0 0 0 0 0 0 0 0 0 4.0345 -8.8270 0.0000 C 0 0 0 0 0 0 0 0 0 0 0 0 1.0514 -10.5509 0.0000 C 0 0 0 0 0 0 0 0 0 0 0 0 4.0345 -10.5509 0.0000 C 0 0 0 0 0 0 0 0 0 0 0 0 2.5430 -…	2351	C10 H18 O2	170.131	213165	97
	FALSE	#22310 -OEChem-02070708212D 30 30 0 1 0 0 0 0 0999 V2000 3.9680 -0.6013 0.0000 O 0 0 0 0 0 0 0 0 0 0 0 0 6.6791 -0.6316 0.0000 O 0 0 0 0 0 0 0 0 0 0 0 0 4.7770 -0.0135 0.0000 C 0 0 3 0 0 0 0 0 0 0 0 0 3.1590 -0.0135 0.0000 C 0 0 3 0 0 0 0 0 0 0 0 0 4.4680 0.9375 0.0000 C 0 0 0 0 0 0 0 0 0 0 0 0 3.4680 0.9375 0.0000 C 0 0 0 0 0 0 0 0 0 0 0 0 5.7281 -0.3226 0.0000 C 0 0 0 0 0 0 0 0 0 0 0 0 2.5712 -…	3746	C10 H18 O2	170.131	20938	94
	FALSE	#26396 -OEChem-02070708192D 30 30 0 1 0 0 0 0 0999 V2000 3.8660 -1.1270 0.0000 O 0 0 0 0 0 0 0 0 0 0 0 0 2.1340 0.8730 0.0000 O 0 0 0 0 0 0 0 0 0 0 0 0 3.0000 -0.6270 0.0000 C 0 0 0 0 0 0 0 0 0 0 0 0 3.0000 0.3730 0.0000 C 0 0 3 0 0 0 0 0 0 0 0 0 4.7321 -0.6270 0.0000 C 0 0 3 0 0 0 0 0 0 0 0 0 3.8660 0.8730 0.0000 C 0 0 0 0 0 0 0 0 0 0 0 0 4.7321 0.3730 0.0000 C 0 0 0 0 0 0 0 0 0 0 0 0 2.0000 -0.…	MFCD06200770	C10 H18 O2	170.131	24591	83
	FALSE	# ACD/Labs06251410132D 12 11 0 0 0 0 0 0 0 0 1 V2000 0.0000 -9.2175 0.0000 O 0 0 0 0 0 0 0 0 0 0 0 0 1.3271 -9.2175 0.0000 C 0 0 0 0 0 0 0 0 0 0 0 0 1.9907 -10.3683 0.0000 O 0 0 0 0 0 0 0 0 0 0 0 0 1.9907 -8.0666 0.0000 C 0 0 0 0 0 0 0 0 0 0 0 0 1.3271 -6.9157 0.0000 C 0 0 0 0 0 0 0 0 0 0 0 0 1.9907 -5.7648 0.0000 C 0 0 0 0 0 0 0 0 0 0 0 0 1.3271 -4.6035 0.0000 C 0 0 0 0 0 0 0 0 0 0 0 0 1.9907 -3…	1704210	C10 H18 O2	170.131	4517892	83
	FALSE	# ACD/Labs04281711282D 30 29 0 0 0 0 0 0 0 0 1 V2000 5.4574 -3.5501 0.0000 O 0 0 0 0 0 0 0 0 0 0 0 0 3.9538 -6.1535 0.0000 O 0 0 0 0 0 0 0 0 0 0 0 0 2.4363 -3.5501 0.0000 C 0 0 0 0 0 0 0 0 0 0 0 0 8.4645 -3.5501 0.0000 C 0 0 0 0 0 0 0 0 0 0 0 0 6.9609 -4.4132 0.0000 C 0 0 0 0 0 0 0 0 0 0 0 0 3.9538 -4.4132 0.0000 C 0 0 0 0 0 0 0 0 0 0 0 0 0.9328 -4.4132 0.0000 C 0 0 0 0 0 0 0 0 0 0 0 0 2.4363 -1.…	(3Z)-Hex-3-enyl isobutyrate	C10 H18 O2	170.131	4509411	80
	FALSE	# ACD/Labs04281711282D 30 29 0 0 0 0 0 0 0 0 1 V2000 6.9605 -2.6081 0.0000 O 0 0 0 0 0 0 0 0 0 0 0 0 5.4532 0.0000 0.0000 O 0 0 0 0 0 0 0 0 0 0 0 0 12.9895 -2.6081 0.0000 C 0 0 0 0 0 0 0 0 0 0 0 0 14.4968 -1.7444 0.0000 C 0 0 0 0 0 0 0 0 0 0 0 0 3.9460 -2.6081 0.0000 C 0 0 0 0 0 0 0 0 0 0 0 0 2.4387 -1.7444 0.0000 C 0 0 0 0 0 0 0 0 0 0 0 0 11.4823 -1.7444 0.0000 C 0 0 0 0 0 0 0 0 0 0 0 0 8.4678 -…	(E)-Hex-2-enyl butyrate	C10 H18 O2	170.131	4509341	75
	FALSE	#529481 -OEChem-02070708262D 30 29 0 1 0 0 0 0 0999 V2000 4.5981 1.2500 0.0000 O 0 0 0 0 0 0 0 0 0 0 0 0 2.8660 1.2500 0.0000 O 0 0 0 0 0 0 0 0 0 0 0 0 6.3301 0.2500 0.0000 C 0 0 0 0 0 0 0 0 0 0 0 0 5.4641 -0.2500 0.0000 C 0 0 0 0 0 0 0 0 0 0 0 0 7.1962 -0.2500 0.0000 C 0 0 0 0 0 0 0 0 0 0 0 0 3.7321 -0.2500 0.0000 C 0 0 3 0 0 0 0 0 0 0 0 0 4.5981 0.2500 0.0000 C 0 0 0 0 0 0 0 0 0 0 0 0 8.0622 0.…	3-methyl-2,4-nonandione	C10 H18 O2	170.131	461444	65
	FALSE	# ACD/Labs04281711072D 30 30 0 0 0 0 0 0 0 0 1 V2000 4.0339 -3.6550 0.0000 O 0 0 0 0 0 0 0 0 0 0 0 0 7.0165 -3.6550 0.0000 O 0 0 0 0 0 0 0 0 0 0 0 0 2.5426 -7.9578 0.0000 C 0 0 0 0 0 0 0 0 0 0 0 0 1.0513 -8.8257 0.0000 C 0 0 0 0 0 0 0 0 0 0 0 0 4.0339 -8.8257 0.0000 C 0 0 0 0 0 0 0 0 0 0 0 0 1.0513 -10.5493 0.0000 C 0 0 0 0 0 0 0 0 0 0 0 0 4.0339 -10.5493 0.0000 C 0 0 0 0 0 0 0 0 0 0 0 0 2.5426 -…	2348	C10 H18 O2	170.131	28550	64
	FALSE	#5352451 -OEChem-02070710092D 30 29 0 1 0 0 0 0 0999 V2000 7.3671 0.5976 0.0000 O 0 0 0 0 0 0 0 0 0 0 0 0 2.5369 -0.7685 0.0000 O 0 0 0 0 0 0 0 0 0 0 0 0 6.8671 -0.2685 0.0000 C 0 0 3 0 0 0 0 0 0 0 0 0 6.0010 0.2315 0.0000 C 0 0 0 0 0 0 0 0 0 0 0 0 3.4030 -0.2685 0.0000 C 0 0 0 0 0 0 0 0 0 0 0 0 5.1350 -0.2685 0.0000 C 0 0 0 0 0 0 0 0 0 0 0 0 4.2690 0.2315 0.0000 C 0 0 0 0 0 0 0 0 0 0 0 0 6.3671 …	2,6-Dimethyl-3,7-octadiene-2,6-diol	C10 H18 O2	170.131	4509333	56
	FALSE	#62583 -OEChem-02070708212D 30 30 0 1 0 0 0 0 0999 V2000 6.3264 -0.8714 0.0000 O 0 0 0 0 0 0 0 0 0 0 0 0 8.0092 -1.0611 0.0000 O 0 0 0 0 0 0 0 0 0 0 0 0 5.4254 -0.4376 0.0000 C 0 0 3 0 0 0 0 0 0 0 0 0 5.2029 0.5374 0.0000 C 0 0 0 0 0 0 0 0 0 0 0 0 4.6436 -1.0611 0.0000 C 0 0 0 0 0 0 0 0 0 0 0 0 5.8264 1.3192 0.0000 C 0 0 0 0 0 0 0 0 0 0 0 0 6.8264 1.3192 0.0000 C 0 0 0 0 0 0 0 0 0 0 0 0 3.7127 -0…	3613	C10 H18 O2	170.131	56345	56
	FALSE	#87947 -OEChem-02070708202D 30 29 0 1 0 0 0 0 0999 V2000 7.1962 0.7500 0.0000 O 0 0 0 0 0 0 0 0 0 0 0 0 8.0622 -0.7500 0.0000 O 0 0 0 0 0 0 0 0 0 0 0 0 5.4641 0.7500 0.0000 C 0 0 0 0 0 0 0 0 0 0 0 0 6.3301 0.2500 0.0000 C 0 0 3 0 0 0 0 0 0 0 0 0 4.5981 0.2500 0.0000 C 0 0 0 0 0 0 0 0 0 0 0 0 6.3301 -0.7500 0.0000 C 0 0 0 0 0 0 0 0 0 0 0 0 3.7321 0.7500 0.0000 C 0 0 0 0 0 0 0 0 0 0 0 0 2.8660 0.25…	6-Methyl-5-hepten-2-yl acetate	C10 H18 O2	170.131	79344	55
	FALSE	#6428573 -OEChem-02070710332D 30 30 0 1 0 0 0 0 0999 V2000 3.9680 -0.6013 0.0000 O 0 0 0 0 0 0 0 0 0 0 0 0 6.6791 -0.6316 0.0000 O 0 0 0 0 0 0 0 0 0 0 0 0 4.7770 -0.0135 0.0000 C 0 0 2 0 0 0 0 0 0 0 0 0 3.1590 -0.0135 0.0000 C 0 0 2 0 0 0 0 0 0 0 0 0 4.4680 0.9375 0.0000 C 0 0 0 0 0 0 0 0 0 0 0 0 3.4680 0.9375 0.0000 C 0 0 0 0 0 0 0 0 0 0 0 0 5.7281 -0.3226 0.0000 C 0 0 0 0 0 0 0 0 0 0 0 0 2.5712…	b-Linalyl oxide	C10 H18 O2	170.131	4933975	53
	FALSE	# ACD/Labs04281711142D 30 29 0 0 0 0 0 0 0 0 1 V2000 3.9460 -1.0839 0.0000 O 0 0 0 0 0 0 0 0 0 0 0 0 5.4532 -3.6919 0.0000 O 0 0 0 0 0 0 0 0 0 0 0 0 12.9895 -1.0839 0.0000 C 0 0 0 0 0 0 0 0 0 0 0 0 11.4823 -1.9476 0.0000 C 0 0 0 0 0 0 0 0 0 0 0 0 14.4968 -1.9476 0.0000 C 0 0 0 0 0 0 0 0 0 0 0 0 9.9750 -1.0839 0.0000 C 0 0 0 0 0 0 0 0 0 0 0 0 16.0041 -1.0839 0.0000 C 0 0 0 0 0 0 0 0 0 0 0 0 8.4678…	ETHYL-3-OCTENOATE	C10 H18 O2	170.131	4516553	53
	FALSE	# ACD/Labs04221415492D 12 11 0 0 0 0 0 0 0 0 1 V2000 6.8288 0.0000 0.0000 O 0 0 0 0 0 0 0 0 0 0 0 0 0.0000 -1.2622 0.0000 O 0 0 0 0 0 0 0 0 0 0 0 0 6.8288 -1.2622 0.0000 C 0 0 0 0 0 0 0 0 0 0 0 0 5.7028 -1.9251 0.0000 C 0 0 0 0 0 0 0 0 0 0 0 0 7.9548 -1.9251 0.0000 C 0 0 0 0 0 0 0 0 0 0 0 0 4.5767 -1.2622 0.0000 C 0 0 0 0 0 0 0 0 0 0 0 0 2.2520 -1.2622 0.0000 C 0 0 0 0 0 0 0 0 0 0 0 0 3.4507 -1.9…	8-Hydroxylinalool	C10 H18 O2	170.131	4444270	50
	FALSE	# ACD/Labs04281712462D 30 29 0 0 0 0 0 0 0 0 1 V2000 3.9460 -2.6081 0.0000 O 0 0 0 0 0 0 0 0 0 0 0 0 5.4532 0.0000 0.0000 O 0 0 0 0 0 0 0 0 0 0 0 0 12.9895 -2.6081 0.0000 C 0 0 0 0 0 0 0 0 0 0 0 0 8.4678 -1.7444 0.0000 C 0 0 0 0 0 0 0 0 0 0 0 0 14.4968 -1.7444 0.0000 C 0 0 0 0 0 0 0 0 0 0 0 0 6.9605 -2.6081 0.0000 C 0 0 0 0 0 0 0 0 0 0 0 0 11.4823 -1.7444 0.0000 C 0 0 0 0 0 0 0 0 0 0 0 0 9.9750 -…	Ethyl (E)-oct-4-enoate	C10 H18 O2	170.131	4509630	45
	FALSE	# ACD/Labs06161415502D 13 13 0 0 1 0 0 0 0 0 1 V2000 2.4270 -2.6466 0.0000 O 0 0 0 0 0 0 0 0 0 0 0 0 5.9341 -0.7833 0.0000 O 0 0 0 0 0 0 0 0 0 0 0 0 3.5070 -1.8633 0.0000 C 0 0 0 0 0 0 0 0 0 0 0 0 1.3530 -1.8633 0.0000 C 0 0 0 0 0 0 0 0 0 0 0 0 3.0916 -0.5993 0.0000 C 0 0 0 0 0 0 0 0 0 0 0 0 1.7624 -0.5993 0.0000 C 0 0 0 0 0 0 0 0 0 0 0 0 4.7176 -1.3233 0.0000 C 0 0 0 0 0 0 0 0 0 0 0 0 0.6884 -3.…	a-Linalyl oxide	C10 H18 O2	170.131	4937513	44
	FALSE	# ACD/Labs04281713042D 30 29 0 0 0 0 0 0 0 0 1 V2000 0.9312 -1.0836 0.0000 O 0 0 0 0 0 0 0 0 0 0 0 0 2.4382 -3.6911 0.0000 O 0 0 0 0 0 0 0 0 0 0 0 0 12.9866 -1.0836 0.0000 C 0 0 0 0 0 0 0 0 0 0 0 0 11.4797 -1.9471 0.0000 C 0 0 0 0 0 0 0 0 0 0 0 0 6.9589 -1.0836 0.0000 C 0 0 0 0 0 0 0 0 0 0 0 0 5.4520 -1.9471 0.0000 C 0 0 0 0 0 0 0 0 0 0 0 0 14.4935 -1.9471 0.0000 C 0 0 0 0 0 0 0 0 0 0 0 0 9.9727 …	5-Decenoic acid	C10 H18 O2	170.131	4515103	43
	FALSE	# ACD/Labs04221415492D 12 12 0 0 0 0 0 0 0 0 1 V2000 2.7118 -2.6321 0.0000 O 0 0 0 0 0 0 0 0 0 0 0 0 4.2641 -4.2396 0.0000 O 0 0 0 0 0 0 0 0 0 0 0 0 1.5154 -2.0431 0.0000 C 0 0 0 0 0 0 0 0 0 0 0 0 2.9941 -3.9328 0.0000 C 0 0 0 0 0 0 0 0 0 0 0 0 0.8160 -4.9513 0.0000 C 0 0 0 0 0 0 0 0 0 0 0 0 1.5277 -0.6872 0.0000 C 0 0 0 0 0 0 0 0 0 0 0 0 0.3129 -2.6075 0.0000 C 0 0 0 0 0 0 0 0 0 0 0 0 2.1535 -4.…	7-Isopropyl-4-methyl-2-oxepanone	C10 H18 O2	170.131	56140	40
	FALSE	# ACD/Labs04281712442D 12 11 0 0 0 0 0 0 0 0 1 V2000 0.0000 -1.3281 0.0000 O 0 0 0 0 0 0 0 0 0 0 0 0 10.3757 -1.9921 0.0000 O 0 0 0 0 0 0 0 0 0 0 0 0 6.9206 -1.3281 0.0000 C 0 0 0 0 0 0 0 0 0 0 0 0 2.3034 -1.3281 0.0000 C 0 0 0 0 0 0 0 0 0 0 0 0 5.7689 -1.9921 0.0000 C 0 0 0 0 0 0 0 0 0 0 0 0 3.4551 -1.9921 0.0000 C 0 0 0 0 0 0 0 0 0 0 0 0 4.6068 -1.3281 0.0000 C 0 0 0 0 0 0 0 0 0 0 0 0 8.0723 -1…	8-hydroxygeraniol	C10 H18 O2	170.131	4515751	38
	FALSE	# ACD/Labs04281711332D 12 11 0 0 0 0 0 0 0 0 1 V2000 5.7579 -3.9902 0.0000 C 0 0 0 0 0 0 0 0 0 0 0 0 4.6063 -3.3281 0.0000 C 0 0 0 0 0 0 0 0 0 0 0 0 3.4547 -3.9902 0.0000 C 0 0 0 0 0 0 0 0 0 0 0 0 2.3032 -3.3223 0.0000 C 0 0 0 0 0 0 0 0 0 0 0 0 1.1516 -3.9902 0.0000 C 0 0 0 0 0 0 0 0 0 0 0 0 0.0000 -3.3223 0.0000 C 0 0 0 0 0 0 0 0 0 0 0 0 0.0000 -1.9980 0.0000 C 0 0 0 0 0 0 0 0 0 0 0 0 1.1516 -1.…	cis-4-decenoic acid	C10 H18 O2	170.131	4471776	36
	FALSE	# ACD/Labs04221415492D 12 12 0 0 0 0 0 0 0 0 1 V2000 2.1033 0.0000 0.0000 O 0 0 0 0 0 0 0 0 0 0 0 0 3.4607 -0.9423 0.0000 O 0 0 0 0 0 0 0 0 0 0 0 0 1.1610 -0.9423 0.0000 C 0 0 0 0 0 0 0 0 0 0 0 0 2.3108 -1.6041 0.0000 C 0 0 0 0 0 0 0 0 0 0 0 0 1.1610 -3.6121 0.0000 C 0 0 0 0 0 0 0 0 0 0 0 0 0.0000 -1.6041 0.0000 C 0 0 0 0 0 0 0 0 0 0 0 0 2.3108 -2.9390 0.0000 C 0 0 0 0 0 0 0 0 0 0 0 0 0.0000 -2.9…	8-p-Menthene-1,2-diol	C10 H18 O2	170.131	85027	36
	FALSE	# ACD/Labs04281711282D 30 29 0 0 0 0 0 0 0 0 1 V2000 0.9312 -2.6075 0.0000 O 0 0 0 0 0 0 0 0 0 0 0 0 2.4382 0.0000 0.0000 O 0 0 0 0 0 0 0 0 0 0 0 0 6.9589 -2.6075 0.0000 C 0 0 0 0 0 0 0 0 0 0 0 0 5.4520 -1.7440 0.0000 C 0 0 0 0 0 0 0 0 0 0 0 0 8.4658 -1.7440 0.0000 C 0 0 0 0 0 0 0 0 0 0 0 0 3.9451 -2.6075 0.0000 C 0 0 0 0 0 0 0 0 0 0 0 0 9.9727 -2.6075 0.0000 C 0 0 0 0 0 0 0 0 0 0 0 0 12.9866 -2.…	6-Decenoic acid	C10 H18 O2	170.131	4515104	35
	FALSE	# ACD/Labs04281711292D 12 12 0 0 1 0 0 0 0 0 1 V2000 2.0859 0.0000 0.0000 O 0 0 0 0 0 0 0 0 0 0 0 0 3.4597 -0.9476 0.0000 O 0 0 0 0 0 0 0 0 0 0 0 0 1.1607 -0.9420 0.0000 C 0 0 0 0 0 0 0 0 0 0 0 0 2.2990 -1.6093 0.0000 C 0 0 0 0 0 0 0 0 0 0 0 0 1.1607 -3.6111 0.0000 C 0 0 0 0 0 0 0 0 0 0 0 0 0.0000 -1.6093 0.0000 C 0 0 0 0 0 0 0 0 0 0 0 0 2.2990 -2.9382 0.0000 C 0 0 0 0 0 0 0 0 0 0 0 0 0.0000 -2.9…	4409	C10 H18 O2	170.131	390019	33
	FALSE	#92570 -OEChem-02070708202D 30 29 0 0 0 0 0 0 0999 V2000 5.4641 0.7500 0.0000 O 0 0 0 0 0 0 0 0 0 0 0 0 6.3301 -0.7500 0.0000 O 0 0 0 0 0 0 0 0 0 0 0 0 2.8660 0.2500 0.0000 C 0 0 0 0 0 0 0 0 0 0 0 0 3.7321 0.7500 0.0000 C 0 0 0 0 0 0 0 0 0 0 0 0 4.5981 0.2500 0.0000 C 0 0 0 0 0 0 0 0 0 0 0 0 2.0000 0.7500 0.0000 C 0 0 0 0 0 0 0 0 0 0 0 0 2.8660 -0.7500 0.0000 C 0 0 0 0 0 0 0 0 0 0 0 0 6.3301 0.25…	Isoamyl senecioate	C10 H18 O2	170.131	83573	32
	FALSE	# ACD/Labs04281713142D 30 30 0 0 1 0 0 0 0 0 1 V2000 4.2788 -4.5144 0.0000 O 0 0 0 0 0 0 0 0 0 0 0 0 1.3006 -1.0744 0.0000 O 0 0 0 0 0 0 0 0 0 0 0 0 2.7897 -3.6568 0.0000 C 0 0 0 0 0 0 0 0 0 0 0 0 2.7897 -1.9321 0.0000 C 0 0 0 0 0 0 0 0 0 0 0 0 5.7773 -3.6568 0.0000 C 0 0 0 0 0 0 0 0 0 0 0 0 4.2788 -1.0744 0.0000 C 0 0 0 0 0 0 0 0 0 0 0 0 5.7773 -1.9321 0.0000 C 0 0 0 0 0 0 0 0 0 0 0 0 1.0650 -3.…	cis-(+)-linalool oxide pyranoid	C10 H18 O2	170.131	4933976	27
	FALSE	#113425 -OEChem-02070708202D 30 29 0 1 0 0 0 0 0999 V2000 5.4641 0.2500 0.0000 O 0 0 0 0 0 0 0 0 0 0 0 0 4.5981 -1.2500 0.0000 O 0 0 0 0 0 0 0 0 0 0 0 0 7.1962 0.2500 0.0000 C 0 0 3 0 0 0 0 0 0 0 0 0 8.0622 -0.2500 0.0000 C 0 0 0 0 0 0 0 0 0 0 0 0 6.3301 -0.2500 0.0000 C 0 0 0 0 0 0 0 0 0 0 0 0 7.1962 1.2500 0.0000 C 0 0 0 0 0 0 0 0 0 0 0 0 8.9282 0.2500 0.0000 C 0 0 0 0 0 0 0 0 0 0 0 0 4.5981 -0…	2-Methylbutyl 3-methyl-2-butenoate	C10 H18 O2	170.131	101641	24
	FALSE	# ACD/Labs04221415492D 12 13 0 0 0 0 0 0 0 0 1 V2000 1.8150 -1.8768 0.0000 O 0 0 0 0 0 0 0 0 0 0 0 0 0.0000 -3.4780 0.0000 O 0 0 0 0 0 0 0 0 0 0 0 0 2.3614 -3.4922 0.0000 C 0 0 0 0 0 0 0 0 0 0 0 0 2.5847 -0.9408 0.0000 C 0 0 0 0 0 0 0 0 0 0 0 0 2.5800 -2.3282 0.0000 C 0 0 0 0 0 0 0 0 0 0 0 0 1.1973 -4.0291 0.0000 C 0 0 0 0 0 0 0 0 0 0 0 0 1.4302 -2.8413 0.0000 C 0 0 0 0 0 0 0 0 0 0 0 0 3.6633 -4.…	1,3,3-Trimethyl-2-oxabicyclo[2.2.2]octan-6-ol	C10 H18 O2	170.131	461626	23
	FALSE	# ACD/Labs04281711132D 30 30 0 0 1 0 0 0 0 0 1 V2000 4.2788 -4.5144 0.0000 O 0 0 0 0 0 0 0 0 0 0 0 0 1.3006 -1.0744 0.0000 O 0 0 0 0 0 0 0 0 0 0 0 0 2.7897 -3.6568 0.0000 C 0 0 0 0 0 0 0 0 0 0 0 0 2.7897 -1.9321 0.0000 C 0 0 0 0 0 0 0 0 0 0 0 0 5.7773 -3.6568 0.0000 C 0 0 0 0 0 0 0 0 0 0 0 0 4.2788 -1.0744 0.0000 C 0 0 0 0 0 0 0 0 0 0 0 0 5.7773 -1.9321 0.0000 C 0 0 0 0 0 0 0 0 0 0 0 0 1.0650 -3.…	(3S,6S)-2,2,6-Trimethyl-6-vinyltetrahydro-2H-pyran-3-ol	C10 H18 O2	170.131	4933200	22
	FALSE	# ACD/Labs04281713142D 30 30 0 0 1 0 0 0 0 0 1 V2000 4.2788 -4.5144 0.0000 O 0 0 0 0 0 0 0 0 0 0 0 0 1.3006 -1.0744 0.0000 O 0 0 0 0 0 0 0 0 0 0 0 0 2.7897 -3.6568 0.0000 C 0 0 0 0 0 0 0 0 0 0 0 0 2.7897 -1.9321 0.0000 C 0 0 0 0 0 0 0 0 0 0 0 0 5.7773 -3.6568 0.0000 C 0 0 0 0 0 0 0 0 0 0 0 0 4.2788 -1.0744 0.0000 C 0 0 0 0 0 0 0 0 0 0 0 0 5.7773 -1.9321 0.0000 C 0 0 0 0 0 0 0 0 0 0 0 0 1.0650 -3.…	(3R,6S)-2,2,6-Trimethyl-6-vinyltetrahydro-2H-pyran-3-ol	C10 H18 O2	170.131	4933201	21
	FALSE	# ACD/Labs04221415492D 12 12 0 0 1 0 0 0 0 0 1 V2000 2.8730 -2.4952 0.0000 O 0 0 0 0 0 0 0 0 0 0 0 0 4.7819 -3.6809 0.0000 O 0 0 0 0 0 0 0 0 0 0 0 0 1.5766 -2.2020 0.0000 C 0 0 0 0 0 0 0 0 0 0 0 0 3.4463 -3.6874 0.0000 C 0 0 0 0 0 0 0 0 0 0 0 0 1.5766 -5.1858 0.0000 C 0 0 0 0 0 0 0 0 0 0 0 0 0.5342 -3.0229 0.0000 C 0 0 0 0 0 0 0 0 0 0 0 0 1.2834 -0.8795 0.0000 C 0 0 0 0 0 0 0 0 0 0 0 0 2.8730 -4.…	Menthide	C10 H18 O2	170.131	9291621	19
	FALSE	# ACD/Labs04281712482D 30 29 0 0 0 0 0 0 0 0 1 V2000 2.4467 -9.6377 0.0000 O 0 0 0 0 0 0 0 0 0 0 0 0 3.9495 -7.0296 0.0000 O 0 0 0 0 0 0 0 0 0 0 0 0 8.4703 -4.4214 0.0000 C 0 0 0 0 0 0 0 0 0 0 0 0 9.9731 -3.5521 0.0000 C 0 0 0 0 0 0 0 0 0 0 0 0 8.4703 -6.1602 0.0000 C 0 0 0 0 0 0 0 0 0 0 0 0 9.9731 -1.8133 0.0000 C 0 0 0 0 0 0 0 0 0 0 0 0 6.9675 -7.0296 0.0000 C 0 0 0 0 0 0 0 0 0 0 0 0 11.4883 -0…	(2Z)-methyl 2-nonenoate	C10 H18 O2	170.131	4512743	18
	FALSE	#122977 -OEChem-02070708212D 30 30 0 1 0 0 0 0 0999 V2000 5.4641 -2.5000 0.0000 O 0 0 0 0 0 0 0 0 0 0 0 0 3.7321 -2.5000 0.0000 O 0 0 0 0 0 0 0 0 0 0 0 0 4.5981 -1.0000 0.0000 C 0 0 3 0 0 0 0 0 0 0 0 0 3.7321 -0.5000 0.0000 C 0 0 0 0 0 0 0 0 0 0 0 0 5.4641 -0.5000 0.0000 C 0 0 0 0 0 0 0 0 0 0 0 0 3.7321 0.5000 0.0000 C 0 0 0 0 0 0 0 0 0 0 0 0 6.3301 -1.0000 0.0000 C 0 0 0 0 0 0 0 0 0 0 0 0 2.8660…	3-Pentyltetrahydro-2H-pyran-2-one	C10 H18 O2	170.131	109613	18
	FALSE	#526973 -OEChem-02070708252D 30 30 0 1 0 0 0 0 0999 V2000 5.9150 -0.2020 0.0000 O 0 0 0 0 0 0 0 0 0 0 0 0 2.4607 0.4368 0.0000 O 0 0 0 0 0 0 0 0 0 0 0 0 5.1060 0.3858 0.0000 C 0 0 3 0 0 0 0 0 0 0 0 0 6.7240 0.3858 0.0000 C 0 0 3 0 0 0 0 0 0 0 0 0 5.4150 1.3368 0.0000 C 0 0 0 0 0 0 0 0 0 0 0 0 6.4150 1.3368 0.0000 C 0 0 0 0 0 0 0 0 0 0 0 0 4.1550 0.0767 0.0000 C 0 0 3 0 0 0 0 0 0 0 0 0 7.6751 0.69…	2-(5-Methyl-5-vinyltetrahydro-2-furanyl)-1-propanol	C10 H18 O2	170.131	459372	17
	FALSE	# ACD/Labs04281713062D 30 29 0 0 0 0 0 0 0 0 1 V2000 5.6048 -3.6899 0.0000 O 0 0 0 0 0 0 0 0 0 0 0 0 4.0946 -1.0743 0.0000 O 0 0 0 0 0 0 0 0 0 0 0 0 10.1199 -2.8180 0.0000 C 0 0 0 0 0 0 0 0 0 0 0 0 11.6300 -3.6899 0.0000 C 0 0 0 0 0 0 0 0 0 0 0 0 8.6097 -3.6899 0.0000 C 0 0 0 0 0 0 0 0 0 0 0 0 13.1247 -2.8180 0.0000 C 0 0 0 0 0 0 0 0 0 0 0 0 7.0995 -2.8180 0.0000 C 0 0 0 0 0 0 0 0 0 0 0 0 14.6349…	(2Z)-hexyl 2-butenoate	C10 H18 O2	170.131	4512436	15
	FALSE	#5352838 ACLJDraw02201303232D 12 11 0 0 0 0 0 0 0 0999 V2000 6.7993 1.1214 0.0000 C 0 0 0 0 0 0 0 0 0 0 0 0 6.2625 0.8113 0.0000 C 0 0 0 0 0 0 0 0 0 0 0 0 6.7993 1.7416 0.0000 O 0 0 0 0 0 0 0 0 0 0 0 0 7.3362 0.8113 0.0000 O 0 0 0 0 0 0 0 0 0 0 0 0 7.8730 1.1214 0.0000 C 0 0 0 0 0 0 0 0 0 0 0 0 8.4098 0.8113 0.0000 C 0 0 0 0 0 0 0 0 0 0 0 0 8.9477 1.1214 0.0000 C 0 0 0 0 0 0 0 0 0 0 0 0 9.4845 0.…	4671	C10 H18 O2	170.131	4509668	15
	FALSE	# ACD/Labs04221415492D 12 12 0 0 1 0 0 0 0 0 1 V2000 1.8168 0.0000 0.0000 O 0 0 0 0 0 0 0 0 0 0 0 0 3.2447 -0.8765 0.0000 O 0 0 0 0 0 0 0 0 0 0 0 0 1.1493 -1.1493 0.0000 C 0 0 0 0 0 0 0 0 0 0 0 0 2.3044 -1.8168 0.0000 C 0 0 0 0 0 0 0 0 0 0 0 0 1.1493 -3.8077 0.0000 C 0 0 0 0 0 0 0 0 0 0 0 0 0.0000 -1.8168 0.0000 C 0 0 0 0 0 0 0 0 0 0 0 0 2.3044 -3.1460 0.0000 C 0 0 0 0 0 0 0 0 0 0 0 0 0.0000 -3.1…	(1R,2R,4S)-limonene-1,2-diol	C10 H18 O2	170.131	9392549	14
	FALSE	MolHeader ELEMENTL07022017502D Dotmatics Elemental 12 11 0 0 0 0 999 V2000 6.0010 -1.5000 0.0000 C 0 0 0 0 0 5.1350 -2.0000 0.0000 C 0 0 0 0 0 6.6627 -1.8821 0.0000 C 0 0 0 0 0 7.3245 -1.5000 0.0000 C 0 0 0 0 0 7.9863 -1.8821 0.0000 O 0 0 0 0 0 7.3245 -0.7359 0.0000 O 0 0 0 0 0 5.1350 -2.7641 0.0000 C 0 0 0 0 0 4.4732 -3.1462 0.0000 C 0 0 0 0 0 3.8115 -2.7641 0.0000 C 0 0 0 0 0 3.1497 -3.1462 0.0…	(Z)-Dec-3-enoic acid	C10 H18 O2	170.131	4471775	13
	FALSE	#300085 -OEChem-02070708222D 30 30 0 1 0 0 0 0 0999 V2000 2.6200 1.4330 0.0000 O 0 0 0 0 0 0 0 0 0 0 0 0 2.6200 -2.2990 0.0000 O 0 0 0 0 0 0 0 0 0 0 0 0 3.1200 0.5670 0.0000 C 0 0 3 0 0 0 0 0 0 0 0 0 2.2540 0.0670 0.0000 C 0 0 0 0 0 0 0 0 0 0 0 0 2.2540 -0.9330 0.0000 C 0 0 0 0 0 0 0 0 0 0 0 0 3.6200 1.4330 0.0000 C 0 0 0 0 0 0 0 0 0 0 0 0 3.1200 -1.4330 0.0000 C 0 0 3 0 0 0 0 0 0 0 0 0 3.9860 0.…	1-Isopropyl-4-methyl-2-cyclohexene-1,4-diol	C10 H18 O2	170.131	265131	13
	FALSE	#522417 -OEChem-02070708272D 30 29 0 1 0 0 0 0 0999 V2000 3.2321 0.6645 0.0000 O 0 0 0 0 0 0 0 0 0 0 0 0 5.4641 -1.2015 0.0000 O 0 0 0 0 0 0 0 0 0 0 0 0 7.1962 -0.2015 0.0000 C 0 0 0 0 0 0 0 0 0 0 0 0 3.7321 -0.2015 0.0000 C 0 0 3 0 0 0 0 0 0 0 0 0 6.3301 0.2985 0.0000 C 0 0 0 0 0 0 0 0 0 0 0 0 4.5981 0.2985 0.0000 C 0 0 0 0 0 0 0 0 0 0 0 0 5.4641 -0.2015 0.0000 C 0 0 0 0 0 0 0 0 0 0 0 0 8.0622 0…	6-Hydroxy-2,6-dimethyl-7-octen-4-one	C10 H18 O2	170.131	455707	12
	FALSE	# ACD/Labs04281711292D 12 11 0 0 0 0 0 0 0 0 1 V2000 8.0580 -1.3257 0.0000 C 0 0 0 0 0 0 0 0 0 0 0 0 6.9083 -1.9990 0.0000 C 0 0 0 0 0 0 0 0 0 0 0 0 5.7586 -1.3257 0.0000 C 0 0 0 0 0 0 0 0 0 0 0 0 4.5986 -1.9990 0.0000 C 0 0 0 0 0 0 0 0 0 0 0 0 4.5986 -3.3247 0.0000 C 0 0 0 0 0 0 0 0 0 0 0 0 3.4490 -3.9875 0.0000 C 0 0 0 0 0 0 0 0 0 0 0 0 2.2993 -3.3247 0.0000 C 0 0 0 0 0 0 0 0 0 0 0 0 1.1497 -3.…	(3Z)-methyl 3-nonenoate	C10 H18 O2	170.131	21587164	12
	FALSE	# ACD/Labs04111411492D 12 13 0 0 1 0 0 0 0 0 1 V2000 1.2299 -3.5416 0.0000 C 0 0 0 0 0 0 0 0 0 0 0 0 3.6845 -2.1229 0.0000 O 0 0 0 0 0 0 0 0 0 0 0 0 5.1031 -3.5416 0.0000 C 0 0 0 0 0 0 0 0 0 0 0 0 3.6845 -3.5416 0.0000 C 0 0 0 0 0 0 0 0 0 0 0 0 4.3938 -4.7714 0.0000 C 0 0 0 0 0 0 0 0 0 0 0 0 2.4546 -1.4136 0.0000 C 0 0 0 0 0 0 0 0 0 0 0 0 2.4546 0.0000 0.0000 C 0 0 0 0 0 0 0 0 0 0 0 0 2.4546 -4.2…	2-exo-hydroxy-1,8-cineole	C10 H18 O2	170.131	5256723	11
	FALSE	# ACD/Labs04221415492D 14 15 0 0 1 0 0 0 0 0 1 V2000 0.0000 -3.3209 0.0000 O 0 0 0 0 0 0 0 0 0 0 0 0 1.1955 -5.3134 0.0000 O 0 0 0 0 0 0 0 0 0 0 0 0 2.3220 -3.3209 0.0000 C 0 0 0 0 0 0 0 0 0 0 0 0 2.3220 -1.9925 0.0000 C 0 0 0 0 0 0 0 0 0 0 0 0 3.5865 -3.7194 0.0000 C 0 0 0 0 0 0 0 0 0 0 0 0 1.1955 -3.9851 0.0000 C 0 0 0 0 0 0 0 0 0 0 0 0 1.1264 -1.3284 0.0000 C 0 0 0 0 0 0 0 0 0 0 0 0 3.5865 -1.…	(+)-Neomatatabiol	C10 H18 O2	170.131	390869	9
	FALSE	#5352768 -OEChem-02070710092D 30 29 0 0 0 0 0 0 0999 V2000 3.7321 -1.9400 0.0000 O 0 0 0 0 0 0 0 0 0 0 0 0 4.5981 -0.4400 0.0000 O 0 0 0 0 0 0 0 0 0 0 0 0 7.1962 1.0600 0.0000 C 0 0 0 0 0 0 0 0 0 0 0 0 7.1962 0.0600 0.0000 C 0 0 0 0 0 0 0 0 0 0 0 0 8.0622 1.5600 0.0000 C 0 0 0 0 0 0 0 0 0 0 0 0 6.3301 -0.4400 0.0000 C 0 0 0 0 0 0 0 0 0 0 0 0 8.0622 2.5600 0.0000 C 0 0 0 0 0 0 0 0 0 0 0 0 6.3301 -…	Ethyl (2Z)-2-octenoate	C10 H18 O2	170.131	4509599	9
	FALSE	# ACD/Labs02061121572D 12 11 0 0 0 0 0 0 0 0 1 V2000 0.0000 -3.4547 0.0000 C 0 0 0 0 0 0 0 0 0 0 0 0 1.3266 -3.4547 0.0000 C 0 0 0 0 0 0 0 0 0 0 0 0 1.9968 -4.6085 0.0000 C 0 0 0 0 0 0 0 0 0 0 0 0 3.3234 -4.6085 0.0000 C 0 0 0 0 0 0 0 0 0 0 0 0 3.9867 -5.7555 0.0000 C 0 0 0 0 0 0 0 0 0 0 0 0 5.3202 -5.7555 0.0000 C 0 0 0 0 0 0 0 0 0 0 0 0 5.9835 -4.6085 0.0000 C 0 0 0 0 0 0 0 0 0 0 0 0 5.3202 -3.…	(2Z,6E)-2,6-Dimethyl-2,6-octadiene-1,8-diol	C10 H18 O2	170.131	24785381	7
	FALSE	# ACD/Labs08121512342D 12 11 0 0 0 0 0 0 0 0 1 V2000 0.0000 -4.6062 0.0000 C 0 0 0 0 0 0 0 0 0 0 0 0 1.3263 -2.3031 0.0000 C 0 0 0 0 0 0 0 0 0 0 0 0 6.6455 0.0000 0.0000 C 0 0 0 0 0 0 0 0 0 0 0 0 4.8273 -0.4920 0.0000 C 0 0 0 0 0 0 0 0 0 0 0 0 1.3263 -4.6062 0.0000 C 0 0 0 0 0 0 0 0 0 0 0 0 3.3228 -3.4582 0.0000 C 0 0 0 0 0 0 0 0 0 0 0 0 3.9859 -2.3031 0.0000 C 0 0 0 0 0 0 0 0 0 0 0 0 1.9965 -3.4…	(5E)-2,6-Dimethyl-5,7-octadiene-2,3-diol	C10 H18 O2	170.131	35013849	6
	FALSE	# ACD/Labs08121512272D 12 11 0 0 0 0 0 0 0 0 1 V2000 0.0000 -1.9931 0.0000 C 0 0 0 0 0 0 0 0 0 0 0 0 8.0694 -1.3314 0.0000 C 0 0 0 0 0 0 0 0 0 0 0 0 6.9154 -3.3246 0.0000 C 0 0 0 0 0 0 0 0 0 0 0 0 2.3078 -3.3246 0.0000 C 0 0 0 0 0 0 0 0 0 0 0 0 1.1539 -1.3314 0.0000 C 0 0 0 0 0 0 0 0 0 0 0 0 3.4618 -1.3314 0.0000 C 0 0 0 0 0 0 0 0 0 0 0 0 6.9154 -1.9931 0.0000 C 0 0 0 0 0 0 0 0 0 0 0 0 2.3078 -1.…	4-Hydroxy-2,6-dimethyl-7-octen-3-one	C10 H18 O2	170.131	35013449	5
	FALSE	# ACD/Labs02200711182D 12 11 0 0 0 0 0 0 0 0 1 V2000 6.9149 -4.6561 0.0000 O 0 0 0 0 0 0 0 0 0 0 0 0 8.0674 -3.9922 0.0000 C 0 0 0 0 0 0 0 0 0 0 0 0 8.0674 -2.6646 0.0000 O 0 0 0 0 0 0 0 0 0 0 0 0 6.9149 -1.9915 0.0000 C 0 0 0 0 0 0 0 0 0 0 0 0 6.9149 -0.6638 0.0000 C 0 0 0 0 0 0 0 0 0 0 0 0 5.7717 0.0000 0.0000 C 0 0 0 0 0 0 0 0 0 0 0 0 4.6192 -0.6638 0.0000 C 0 0 0 0 0 0 0 0 0 0 0 0 3.4667 0.00…	(2Z)-2-Octen-1-yl acetate	C10 H18 O2	170.131	10231886	4
	FALSE	# ACD/Labs08121512352D 12 12 0 0 0 0 0 0 0 0 1 V2000 3.7272 -5.3253 0.0000 C 0 0 0 0 0 0 0 0 0 0 0 0 5.5194 0.0000 0.0000 C 0 0 0 0 0 0 0 0 0 0 0 0 3.7443 0.0000 0.0000 C 0 0 0 0 0 0 0 0 0 0 0 0 5.2968 -3.0365 0.0000 C 0 0 0 0 0 0 0 0 0 0 0 0 1.8607 -3.9726 0.0000 C 0 0 0 0 0 0 0 0 0 0 0 0 5.7078 -1.7694 0.0000 C 0 0 0 0 0 0 0 0 0 0 0 0 1.3242 -2.7568 0.0000 C 0 0 0 0 0 0 0 0 0 0 0 0 3.1849 -4.10…	(2Z)-3-(5,5-Dimethyltetrahydro-2-furanyl)-2-buten-1-ol	C10 H18 O2	170.131	35014030	4
	FALSE	# ACD/Labs04221415492D 12 13 0 0 1 0 0 0 0 0 1 V2000 3.8282 -1.4765 0.0000 O 0 0 0 0 0 0 0 0 0 0 0 0 0.0000 -0.6493 0.0000 O 0 0 0 0 0 0 0 0 0 0 0 0 2.5826 -1.2119 0.0000 C 0 0 0 0 0 0 0 0 0 0 0 0 3.8282 -2.5537 0.0000 C 0 0 0 0 0 0 0 0 0 0 0 0 2.3998 -2.1930 0.0000 C 0 0 0 0 0 0 0 0 0 0 0 0 0.9330 -1.5967 0.0000 C 0 0 0 0 0 0 0 0 0 0 0 0 0.6589 -2.6836 0.0000 C 0 0 0 0 0 0 0 0 0 0 0 0 2.2604 0.0…	(6S)-1,3,3-Trimethyl-2-oxabicyclo[2.2.2]octan-6-ol	C10 H18 O2	170.131	10128119	2
	FALSE	# ACD/Labs08121512322D 12 13 0 0 0 0 0 0 0 0 1 V2000 0.0780 0.0000 0.0000 C 0 0 0 0 0 0 0 0 0 0 0 0 1.2908 -6.0038 0.0000 C 0 0 0 0 0 0 0 0 0 0 0 0 2.6177 -6.0038 0.0000 C 0 0 0 0 0 0 0 0 0 0 0 0 0.0000 -2.2995 0.0000 C 0 0 0 0 0 0 0 0 0 0 0 0 0.6244 -3.4762 0.0000 C 0 0 0 0 0 0 0 0 0 0 0 0 2.6597 -2.3955 0.0000 C 0 0 0 0 0 0 0 0 0 0 0 0 0.7024 -1.1768 0.0000 C 0 0 0 0 0 0 0 0 0 0 0 0 1.9512 -4.8…	1-Cyclopropyl-4-methyl-1,3-cyclohexanediol	C10 H18 O2	170.131	35014343	1
FALSE	Ethyl docosahexaenoate	C24 H36 O2	Full match	Full match		356.271	13.064	1.75272e+09	4	No MS2	207772	14859.7	184006	1.13645e+09	1.13562e+09	1.45061e+09	1.13982e+09	1.0864e+09	6.4716e+08	1.18972e+09	1.44715e+09	7.99292e+08	1.55871e+09	1.04795e+09	1.09778e+06	8.01244e+08	6.66104e+08	9.64589e+08	7.68865e+08	7.33109e+08	1.15267e+09	1.34857e+09	6.08136e+06	9.27351e+08	1.44572e+06	1.04135e+09	1.01075e+09	1.1013e+09	1.38846e+09	6.80385e+08	1.35615e+09	1.21589e+09	1.05583e+09	1.62152e+09	6.37603e+06	1.7788e+06	9.50702e+08	9.95015e+08	1.17591e+09
	Checked	Structure	Name	Formula	Molecular Weight	CSID	# References
	FALSE	# ACD/Labs04281710402D 26 25 0 0 0 0 0 0 0 0 1 V2000 26.4343 -1.9847 0.0000 O 0 0 0 0 0 0 0 0 0 0 0 0 25.3125 0.0000 0.0000 O 0 0 0 0 0 0 0 0 0 0 0 0 25.3125 -1.3232 0.0000 C 0 0 0 0 0 0 0 0 0 0 0 0 24.1619 -1.9847 0.0000 C 0 0 0 0 0 0 0 0 0 0 0 0 23.0401 -1.3232 0.0000 C 0 0 0 0 0 0 0 0 0 0 0 0 21.8320 -1.9847 0.0000 C 0 0 0 0 0 0 0 0 0 0 0 0 20.5089 -1.9847 0.0000 C 0 0 0 0 0 0 0 0 0 0 0 0 19.3…	Ethyl docosahexaenoate	C24 H36 O2	356.272	8007148	36
	FALSE	# ACD/Labs04281712082D 26 25 0 0 0 0 0 0 0 0 1 V2000 16.1565 0.0000 0.0000 O 0 0 0 0 0 0 0 0 0 0 0 0 15.0094 -0.6624 0.0000 C 0 0 0 0 0 0 0 0 0 0 0 0 13.8461 0.0000 0.0000 C 0 0 0 0 0 0 0 0 0 0 0 0 12.6990 -0.6624 0.0000 C 0 0 0 0 0 0 0 0 0 0 0 0 11.5357 0.0000 0.0000 C 0 0 0 0 0 0 0 0 0 0 0 0 8.0783 -1.9872 0.0000 C 0 0 0 0 0 0 0 0 0 0 0 0 9.2254 -2.6658 0.0000 C 0 0 0 0 0 0 0 0 0 0 0 0 9.2254 -…	Nisinic acid	C24 H36 O2	356.272	9967286	23
	FALSE	# ACD/Labs06110721142D 26 25 0 0 0 0 0 0 0 0 1 V2000 0.0000 -13.8094 0.0000 C 0 0 0 0 0 0 0 0 0 0 0 0 1.3403 -13.8094 0.0000 C 0 0 0 0 0 0 0 0 0 0 0 0 1.9865 -12.6607 0.0000 C 0 0 0 0 0 0 0 0 0 0 0 0 3.3267 -12.6607 0.0000 C 0 0 0 0 0 0 0 0 0 0 0 0 3.9968 -11.5119 0.0000 C 0 0 0 0 0 0 0 0 0 0 0 0 5.3132 -11.5119 0.0000 C 0 0 0 0 0 0 0 0 0 0 0 0 5.9833 -10.3631 0.0000 C 0 0 0 0 0 0 0 0 0 0 0 0 7.3…	6,9,12,15,18,21-tetracosahexaenoic acid	C24 H36 O2	356.272	16026330	6
	FALSE	# SciTegic04031415222D 26 25 0 0 0 0 0 0 0 0999 V2000 4.6159 0.0000 0.0000 C 0 0 0 0 0 0 0 0 0 0 0 0 3.4576 -0.6742 0.0000 C 0 0 0 0 0 0 0 0 0 0 0 0 2.2993 0.0000 0.0000 C 0 0 0 0 0 0 0 0 0 0 0 0 1.1583 -0.6742 0.0000 C 0 0 0 0 0 0 0 0 0 0 0 0 1.1583 -2.0054 0.0000 C 0 0 0 0 0 0 0 0 0 0 0 0 0.0000 -2.6624 0.0000 C 0 0 0 0 0 0 0 0 0 0 0 0 0.0000 -3.9936 0.0000 C 0 0 0 0 0 0 0 0 0 0 0 0 1.1583 -4.6…	(7Z,9Z,12Z,15Z,18Z,21Z)-7,9,12,15,18,21-Tetracosahexaenoic acid	C24 H36 O2	356.272	30778537	3
FALSE	2-[4-(Hydroxymethyl)cyclohexyl]-2-propanyl hexopyranoside	C16 H30 O7	Full match	Full match		334.199	11.351	1.71163e+09	1	No MS2	431134	40640.4	524451	5.08844e+08	5.00526e+08	1.1839e+06	709556	684240	874465	1.12069e+06	1.71163e+09	1.00362e+06	954899	8.67242e+08	652879	4.18151e+08	3.5283e+08	936989	1.88127e+08	4.55137e+08	1.58435e+06	1.49703e+09	785894	1.31296e+06	745131	4.72202e+08	4.78351e+08	985405	1.63122e+09	923188	1.26269e+06	704956	735228	1.0799e+06	759332	676138	4.28728e+08	4.10705e+08	1.26874e+09
	Checked	Structure	Name	Formula	Molecular Weight	CSID	# References
	FALSE	# ACD/Labs08101905452D 23 24 0 0 0 0 0 0 0 0 1 V2000 4.6106 -2.6556 0.0000 C 0 0 0 0 0 0 0 0 0 0 0 0 4.6106 -3.9891 0.0000 C 0 0 0 0 0 0 0 0 0 0 0 0 5.7633 -4.6446 0.0000 C 0 0 0 0 0 0 0 0 0 0 0 0 6.9047 -3.9891 0.0000 C 0 0 0 0 0 0 0 0 0 0 0 0 6.9047 -2.6556 0.0000 C 0 0 0 0 0 0 0 0 0 0 0 0 5.7633 -1.9889 0.0000 C 0 0 0 0 0 0 0 0 0 0 0 0 5.7633 -0.6667 0.0000 C 0 0 0 0 0 0 0 0 0 0 0 0 4.6106 0.0…	2-[4-(Hydroxymethyl)cyclohexyl]-2-propanyl hexopyranoside	C16 H30 O7	334.199	74886395	1
FALSE			No results	No results		323.301	11.797	1.69127e+09	0	No MS2	203508	12334.6	188668	1.74192e+08	1.38847e+08	845212	774710	589900	548797	1.28369e+06	1.69127e+09	749759	1.25615e+06	1.18122e+09	624078	1.16836e+08	1.08041e+08	578966	1.20009e+08	2.99832e+07	1.30351e+06	1.49275e+09	577966	297515	709688	1.54266e+08	1.47418e+08	471074	1.21932e+09	276688	332930	219727	224026	684316	454439	448594	1.58938e+08	1.51089e+08	1.47477e+09
	Checked	Structure	Name	Formula	Molecular Weight	CSID	# References
FALSE		C12 H25 N O2	Full match	No results		215.188	11.155	1.64918e+09	0	No MS2	265920	24449.6	305347	1.18489e+08	1.0713e+08	2.05033e+06	847833	1.19985e+06	793137	1.06442e+06	3.29066e+08	1.13531e+06	1.66612e+06	1.21796e+09	540051	7.71769e+07	6.85827e+07	1.37653e+06	2.5777e+08	2.03696e+08	1.95407e+06	1.64918e+09	1.82335e+06	1.15112e+06	844513	1.00443e+08	1.01249e+08	1.71788e+06	1.34851e+09	772991	1.1794e+06	992176	1.05442e+06	1.54516e+06	1.16711e+06	771772	1.04991e+08	9.82927e+07	7.14069e+08
	Checked	Structure	Name	Formula	Molecular Weight	CSID	# References
FALSE			No results	No results		154.967	0.797	1.55224e+09	0	No MS2	75341.4	85421.7	86922.1	6.18101e+06	5.70512e+06	6.05973e+06	4.07266e+06	4.98833e+06	5.8126e+06	5.00198e+06	5.87296e+06	4.99342e+06	6.16175e+06	5.05034e+06	803976	5.09675e+06	4.53059e+06	5.60814e+06	5.79742e+06	4.22434e+06	5.84015e+06	6.40223e+06	6.15997e+06	5.71556e+06	709031	5.52994e+06	5.75932e+06	5.6612e+06	6.18827e+06	1.91924e+07	5.22287e+06	4.725e+06	4.52941e+06	6.82078e+06	5.85571e+06	738513	5.25721e+06	5.44147e+06	5.62659e+06
	Checked	Structure	Name	Formula	Molecular Weight	CSID	# References
FALSE	Glycocholic acid	C26 H43 N O6	Full match	Full match		465.308	11.453	1.51849e+09	4	No MS2	232034	25034.9	244952	2.30838e+08	2.03361e+08	487522	486925	1.89313e+06	319534	818806	3.09473e+06	915235	1.03211e+06	5.95755e+06	1.2453e+06	1.64232e+08	1.27541e+08	404006	8.75582e+08	1.3635e+06	3.65572e+06	7.53169e+08	1.7937e+06	2.18115e+06	545524	2.80603e+08	1.98806e+08	1.62933e+06	3.00794e+06	766446	596027	362815	1.29971e+06	2.7524e+06	409339	730121	2.16419e+08	1.72199e+08	1.51849e+09
	Checked	Structure	Name	Formula	Molecular Weight	CSID	# References
	FALSE	# ACD/Labs04281711132D 38 41 0 0 1 0 0 0 0 0 1 V2000 5.4337 -2.6617 0.0000 O 0 0 0 0 0 0 0 0 0 0 0 0 6.6149 -8.1584 0.0000 O 0 0 0 0 0 0 0 0 0 0 0 0 0.0000 -8.1899 0.0000 O 0 0 0 0 0 0 0 0 0 0 0 0 11.0878 0.0000 0.0000 O 0 0 0 0 0 0 0 0 0 0 0 0 14.5686 -3.3547 0.0000 O 0 0 0 0 0 0 0 0 0 0 0 0 15.7498 -1.3387 0.0000 O 0 0 0 0 0 0 0 0 0 0 0 0 12.2533 -2.0160 0.0000 N 0 0 0 0 0 0 0 0 0 0 0 0 5.4967 …	Glycocholic acid	C26 H43 N O6	465.309	9734	159
	FALSE	# ACD/Labs11041014012D 41 44 0 0 1 0 0 0 0 0 1 V2000 6.8844 -8.7340 0.0000 C 0 0 0 0 0 0 0 0 0 0 0 0 5.6514 -9.1322 0.0000 C 0 0 0 0 0 0 0 0 0 0 0 0 4.4055 -9.5303 0.0000 H 0 0 0 0 0 0 0 0 0 0 0 0 6.0496 -10.3652 0.0000 C 0 0 0 0 0 0 0 0 0 0 0 0 7.3211 -10.6349 0.0000 C 0 0 0 0 0 0 0 0 0 0 0 0 7.7193 -11.8808 0.0000 C 0 0 0 0 0 0 0 0 0 0 0 0 6.8588 -12.8441 0.0000 O 0 0 0 0 0 0 0 0 0 0 0 0 8.9909…	N-[(3alpha,7alpha,12alpha,20R)-3,7,12-Trihydroxy-24-oxocholan-24-yl]glycine	C26 H43 N O6	465.309	24747221	21
	FALSE	# Marvin 02061100142D 39 42 0 0 1 0 0 0 0 0999 V2000 5.7069 -1.2055 0.0000 H 0 0 0 0 0 0 0 0 0 0 0 0 4.9924 -1.6180 0.0000 C 0 0 2 0 0 0 0 0 0 0 0 0 4.9924 -0.7930 0.0000 C 0 0 0 0 0 0 0 0 0 0 0 0 5.7069 -2.0305 0.0000 C 0 0 0 0 0 0 0 0 0 0 0 0 6.4214 -1.6180 0.0000 C 0 0 0 0 0 0 0 0 0 0 0 0 7.1358 -2.0305 0.0000 C 0 0 0 0 0 0 0 0 0 0 0 0 7.1358 -2.8555 0.0000 O 0 0 0 0 0 0 0 0 0 0 0 0 7.8503 -1.…	N-[(3alpha,5beta,7beta,12alpha)-3,7,12-Trihydroxy-24-oxocholan-24-yl]glycine	C26 H43 N O6	465.309	24850145	5
	FALSE	#439604 -OEChem-02070708252D 76 79 0 1 0 0 0 0 0999 V2000 7.0628 0.5652 0.0000 O 0 0 0 0 0 0 0 0 0 0 0 0 7.9506 -3.9663 0.0000 O 0 0 0 0 0 0 0 0 0 0 0 0 2.5357 -3.9871 0.0000 O 0 0 0 0 0 0 0 0 0 0 0 0 12.1212 0.9391 0.0000 O 0 0 0 0 0 0 0 0 0 0 0 0 14.0317 3.9969 0.0000 O 0 0 0 0 0 0 0 0 0 0 0 0 12.3854 4.5350 0.0000 O 0 0 0 0 0 0 0 0 0 0 0 0 11.7640 2.6339 0.0000 N 0 0 0 0 0 0 0 0 0 0 0 0 7.9288…	N-[(3alpha,5beta,7alpha,12alpha,17xi)-3,7,12-Trihydroxy-24-oxocholan-24-yl]glycine	C26 H43 N O6	465.309	388682	3
FALSE	12-Hydroxylauric acid	C12 H24 O3	Full match	Full match		216.172	12.966	1.4996e+09	4	No MS2	61676.9	14385.3	71134.7	1.7679e+08	1.59257e+08	489981	297209	449105	700999	7.56423e+06	1.4996e+09	874656	4.13321e+06	6.29027e+08	1.10271e+06	1.07103e+08	9.25557e+07	769281	5.82857e+07	3.1517e+07	6.41972e+06	1.08717e+09	230816	534754	1.63016e+06	1.61336e+08	1.56947e+08	1.18244e+06	9.52243e+08	232957	303985	182290	256350	750740	569785	1.56186e+06	1.43981e+08	1.25922e+08	9.21276e+08
	Checked	Structure	Name	Formula	Molecular Weight	CSID	# References
	FALSE	# ACD/Labs06251410132D 15 14 0 0 0 0 0 0 0 0 1 V2000 0.0000 -8.0609 0.0000 O 0 0 0 0 0 0 0 0 0 0 0 0 1.3302 -8.0609 0.0000 C 0 0 0 0 0 0 0 0 0 0 0 0 1.9953 -6.9036 0.0000 C 0 0 0 0 0 0 0 0 0 0 0 0 3.3254 -6.9036 0.0000 C 0 0 0 0 0 0 0 0 0 0 0 0 3.9905 -5.7597 0.0000 C 0 0 0 0 0 0 0 0 0 0 0 0 5.3207 -5.7597 0.0000 C 0 0 0 0 0 0 0 0 0 0 0 0 5.9858 -4.6024 0.0000 C 0 0 0 0 0 0 0 0 0 0 0 0 7.3160 -4.…	12-Hydroxylauric acid	C12 H24 O3	216.173	71366	189
	FALSE	# ACD/Labs04111411492D 15 14 0 0 0 0 0 0 0 0 1 V2000 12.6851 -1.3280 0.0000 C 0 0 0 0 0 0 0 0 0 0 0 0 11.5231 -1.9920 0.0000 C 0 0 0 0 0 0 0 0 0 0 0 0 12.6851 0.0000 0.0000 O 0 0 0 0 0 0 0 0 0 0 0 0 9.2268 -1.9920 0.0000 C 0 0 0 0 0 0 0 0 0 0 0 0 8.0648 -1.3280 0.0000 C 0 0 0 0 0 0 0 0 0 0 0 0 6.9166 -1.9920 0.0000 C 0 0 0 0 0 0 0 0 0 0 0 0 5.7685 -1.3280 0.0000 C 0 0 0 0 0 0 0 0 0 0 0 0 4.6065 -…	MFCD00133279	C12 H24 O3	216.173	85026	123
	FALSE	# ACD/Labs04111411492D 15 14 0 0 1 0 0 0 0 0 1 V2000 12.6851 -1.3280 0.0000 C 0 0 0 0 0 0 0 0 0 0 0 0 11.5231 -1.9920 0.0000 C 0 0 0 0 0 0 0 0 0 0 0 0 12.6851 0.0000 0.0000 O 0 0 0 0 0 0 0 0 0 0 0 0 9.2268 -1.9920 0.0000 C 0 0 0 0 0 0 0 0 0 0 0 0 8.0648 -1.3280 0.0000 C 0 0 0 0 0 0 0 0 0 0 0 0 6.9166 -1.9920 0.0000 C 0 0 0 0 0 0 0 0 0 0 0 0 5.7685 -1.3280 0.0000 C 0 0 0 0 0 0 0 0 0 0 0 0 4.6065 -…	(3R)-3-Hydroxydodecanoic acid	C12 H24 O3	216.173	4472229	38
	FALSE	#24520 -OEChem-02070708212D 39 38 0 1 0 0 0 0 0999 V2000 8.0622 -0.5950 0.0000 O 0 0 0 0 0 0 0 0 0 0 0 0 12.3923 0.9050 0.0000 O 0 0 0 0 0 0 0 0 0 0 0 0 11.5263 -0.5950 0.0000 O 0 0 0 0 0 0 0 0 0 0 0 0 7.1962 0.9050 0.0000 C 0 0 0 0 0 0 0 0 0 0 0 0 6.3301 0.4050 0.0000 C 0 0 0 0 0 0 0 0 0 0 0 0 8.0622 0.4050 0.0000 C 0 0 3 0 0 0 0 0 0 0 0 0 5.4641 0.9050 0.0000 C 0 0 0 0 0 0 0 0 0 0 0 0 8.9282 0.…	5-Hydroxydodecanoic acid	C12 H24 O3	216.173	22928	12
FALSE	Oleic acid	C18 H34 O2	Full match	Full match		282.255	14.375	1.45835e+09	11	No MS2	751163	69610.4	704946	7.91001e+06	1.11246e+07	4.89201e+07	9.31906e+06	1.07077e+07	1.90019e+07	3.67971e+07	4.50244e+06	4.99462e+06	8.1181e+06	2.53653e+07	1.56523e+06	1.15954e+07	4.78372e+06	1.61171e+07	6.09945e+06	3.83044e+06	7.4609e+07	2.03298e+07	5.67837e+06	8.28143e+06	1.56288e+06	6.80759e+06	7.5305e+06	7.70655e+06	7.66388e+07	6.6329e+06	6.91117e+06	9.5048e+06	1.37237e+08	9.15265e+06	7.82262e+06	1.74537e+06	9.45156e+06	8.68088e+06	2.37682e+07
	Checked	Structure	Name	Formula	Molecular Weight	CSID	# References
	FALSE	# ACD/Labs04281710392D 20 19 0 0 0 0 0 0 0 0 1 V2000 1.1481 0.0000 0.0000 O 0 0 0 0 0 0 0 0 0 0 0 0 0.0000 -2.0039 0.0000 O 0 0 0 0 0 0 0 0 0 0 0 0 1.1481 -1.3359 0.0000 C 0 0 0 0 0 0 0 0 0 0 0 0 2.2961 -2.0039 0.0000 C 0 0 0 0 0 0 0 0 0 0 0 0 3.4442 -1.3359 0.0000 C 0 0 0 0 0 0 0 0 0 0 0 0 4.5922 -2.0039 0.0000 C 0 0 0 0 0 0 0 0 0 0 0 0 5.7403 -1.3359 0.0000 C 0 0 0 0 0 0 0 0 0 0 0 0 6.8884 -2.0…	Oleic acid	C18 H34 O2	282.256	393217	874
	FALSE	# ACD/Labs04281713052D 20 19 0 0 0 0 0 0 0 0 1 V2000 1.1609 0.0000 0.0000 O 0 0 0 0 0 0 0 0 0 0 0 0 0.0000 -2.0108 0.0000 O 0 0 0 0 0 0 0 0 0 0 0 0 1.1609 -1.3474 0.0000 C 0 0 0 0 0 0 0 0 0 0 0 0 2.3010 -2.0108 0.0000 C 0 0 0 0 0 0 0 0 0 0 0 0 3.4618 -1.3474 0.0000 C 0 0 0 0 0 0 0 0 0 0 0 0 4.6020 -2.0108 0.0000 C 0 0 0 0 0 0 0 0 0 0 0 0 5.7628 -1.3474 0.0000 C 0 0 0 0 0 0 0 0 0 0 0 0 6.9029 -2.0…	Elaidic Acid	C18 H34 O2	282.256	553123	614
	FALSE	# ACD/Labs04281711072D 20 19 0 0 0 0 0 0 0 0 1 V2000 1.1359 0.0000 0.0000 O 0 0 0 0 0 0 0 0 0 0 0 0 0.0000 -1.9826 0.0000 O 0 0 0 0 0 0 0 0 0 0 0 0 1.1359 -1.3011 0.0000 C 0 0 0 0 0 0 0 0 0 0 0 0 2.2924 -1.9826 0.0000 C 0 0 0 0 0 0 0 0 0 0 0 0 3.4283 -1.3011 0.0000 C 0 0 0 0 0 0 0 0 0 0 0 0 4.5848 -1.9826 0.0000 C 0 0 0 0 0 0 0 0 0 0 0 0 5.7207 -1.3011 0.0000 C 0 0 0 0 0 0 0 0 0 0 0 0 6.8772 -1.9…	trans-Vaccenic acid	C18 H34 O2	282.256	4444571	322
	FALSE	# ACD/Labs04281711312D 20 19 0 0 0 0 0 0 0 0 1 V2000 17.2426 -2.0001 0.0000 O 0 0 0 0 0 0 0 0 0 0 0 0 16.0874 -1.3277 0.0000 C 0 0 0 0 0 0 0 0 0 0 0 0 14.9494 -2.0001 0.0000 C 0 0 0 0 0 0 0 0 0 0 0 0 13.7941 -1.3277 0.0000 C 0 0 0 0 0 0 0 0 0 0 0 0 12.6389 -2.0001 0.0000 C 0 0 0 0 0 0 0 0 0 0 0 0 11.5008 -1.3277 0.0000 C 0 0 0 0 0 0 0 0 0 0 0 0 10.3456 -2.0001 0.0000 C 0 0 0 0 0 0 0 0 0 0 0 0 9.1…	cis-Vaccenic acid	C18 H34 O2	282.256	4445888	164
	FALSE	# ACD/Labs04111411492D 20 19 0 0 0 0 0 0 0 0 1 V2000 19.5847 -1.3278 0.0000 C 0 0 0 0 0 0 0 0 0 0 0 0 18.4437 -1.9917 0.0000 C 0 0 0 0 0 0 0 0 0 0 0 0 17.2819 -1.3278 0.0000 C 0 0 0 0 0 0 0 0 0 0 0 0 16.1408 -1.9917 0.0000 C 0 0 0 0 0 0 0 0 0 0 0 0 14.9790 -1.3278 0.0000 C 0 0 0 0 0 0 0 0 0 0 0 0 13.8379 -1.9917 0.0000 C 0 0 0 0 0 0 0 0 0 0 0 0 12.6761 -1.3278 0.0000 C 0 0 0 0 0 0 0 0 0 0 0 0 11.…	(6E)-6-Octadecenoic acid	C18 H34 O2	282.256	4445881	95
	FALSE	# ACD/Labs04281711132D 20 19 0 0 0 0 0 0 0 0 1 V2000 1.1348 0.0000 0.0000 O 0 0 0 0 0 0 0 0 0 0 0 0 0.0000 -1.9754 0.0000 O 0 0 0 0 0 0 0 0 0 0 0 0 1.1348 -1.3240 0.0000 C 0 0 0 0 0 0 0 0 0 0 0 0 2.2906 -1.9754 0.0000 C 0 0 0 0 0 0 0 0 0 0 0 0 3.4255 -1.3240 0.0000 C 0 0 0 0 0 0 0 0 0 0 0 0 4.5813 -1.9754 0.0000 C 0 0 0 0 0 0 0 0 0 0 0 0 5.7161 -1.3240 0.0000 C 0 0 0 0 0 0 0 0 0 0 0 0 6.8719 -1.9…	Petroselinic acid	C18 H34 O2	282.256	4444569	88
	FALSE	#5364759 -OEChem-02070710092D 54 53 0 0 0 0 0 0 0999 V2000 3.7321 0.4400 0.0000 O 0 0 0 0 0 0 0 0 0 0 0 0 4.5981 -1.0600 0.0000 O 0 0 0 0 0 0 0 0 0 0 0 0 8.0622 -0.0600 0.0000 C 0 0 0 0 0 0 0 0 0 0 0 0 8.9282 0.4400 0.0000 C 0 0 0 0 0 0 0 0 0 0 0 0 7.1962 0.4400 0.0000 C 0 0 0 0 0 0 0 0 0 0 0 0 9.7942 -0.0600 0.0000 C 0 0 0 0 0 0 0 0 0 0 0 0 6.3301 -0.0600 0.0000 C 0 0 0 0 0 0 0 0 0 0 0 0 10.6603…	Ethyl (9E)-9-hexadecenoate	C18 H34 O2	282.256	4516898	43
	FALSE	#6161490 -OEChem-02070710242D 54 53 0 0 0 0 0 0 0999 V2000 2.5369 0.4400 0.0000 O 0 0 0 0 0 0 0 0 0 0 0 0 3.4030 -1.0600 0.0000 O 0 0 0 0 0 0 0 0 0 0 0 0 8.5991 -0.0600 0.0000 C 0 0 0 0 0 0 0 0 0 0 0 0 9.4651 0.4400 0.0000 C 0 0 0 0 0 0 0 0 0 0 0 0 7.7331 0.4400 0.0000 C 0 0 0 0 0 0 0 0 0 0 0 0 10.3312 -0.0600 0.0000 C 0 0 0 0 0 0 0 0 0 0 0 0 6.8671 -0.0600 0.0000 C 0 0 0 0 0 0 0 0 0 0 0 0 11.197…	13-Octadecenoic acid	C18 H34 O2	282.256	4827881	35
	FALSE	#5312441 -OEChem-02070710132D 54 53 0 0 0 0 0 0 0999 V2000 2.5369 -0.7500 0.0000 O 0 0 0 0 0 0 0 0 0 0 0 0 3.4030 -2.2500 0.0000 O 0 0 0 0 0 0 0 0 0 0 0 0 8.5991 -1.2500 0.0000 C 0 0 0 0 0 0 0 0 0 0 0 0 9.4651 -0.7500 0.0000 C 0 0 0 0 0 0 0 0 0 0 0 0 7.7331 -0.7500 0.0000 C 0 0 0 0 0 0 0 0 0 0 0 0 10.3312 -1.2500 0.0000 C 0 0 0 0 0 0 0 0 0 0 0 0 6.8671 -1.2500 0.0000 C 0 0 0 0 0 0 0 0 0 0 0 0 11.…	(13Z)-octadecenoic acid	C18 H34 O2	282.256	4471866	32
	FALSE	# ACD/Labs04221415492D 20 20 0 0 0 0 0 0 0 0 1 V2000 15.5405 0.0000 0.0000 O 0 0 0 0 0 0 0 0 0 0 0 0 16.6923 -2.0031 0.0000 O 0 0 0 0 0 0 0 0 0 0 0 0 2.8544 -2.0031 0.0000 C 0 0 0 0 0 0 0 0 0 0 0 0 2.8878 -3.3218 0.0000 C 0 0 0 0 0 0 0 0 0 0 0 0 1.7527 -1.2519 0.0000 C 0 0 0 0 0 0 0 0 0 0 0 0 4.0061 -1.3354 0.0000 C 0 0 0 0 0 0 0 0 0 0 0 0 1.9864 -4.2398 0.0000 C 0 0 0 0 0 0 0 0 0 0 0 0 0.4841 -1…	11-Cycloheptylundecanoic acid	C18 H34 O2	282.256	391768	8
	FALSE	#5282755 -OEChem-02070710102D 54 53 0 0 0 0 0 0 0999 V2000 2.5369 -3.0000 0.0000 O 0 0 0 0 0 0 0 0 0 0 0 0 3.4030 -4.5000 0.0000 O 0 0 0 0 0 0 0 0 0 0 0 0 11.1972 1.0000 0.0000 C 0 0 0 0 0 0 0 0 0 0 0 0 11.1972 0.0000 0.0000 C 0 0 0 0 0 0 0 0 0 0 0 0 12.0632 1.5000 0.0000 C 0 0 0 0 0 0 0 0 0 0 0 0 10.3312 -0.5000 0.0000 C 0 0 0 0 0 0 0 0 0 0 0 0 12.0632 2.5000 0.0000 C 0 0 0 0 0 0 0 0 0 0 0 0 10.…	(7Z)-7-Octadecenoic acid	C18 H34 O2	282.256	4445882	8
FALSE	Leu-Val	C11 H22 N2 O3	Full match	Full match		230.163	7.268	1.45794e+09	4	No MS2	2.11371e+06	70507.9	417624	5.00565e+08	4.83823e+08	7.43675e+08	3.00786e+08	3.21135e+08	3.95416e+08	8.63897e+08	7.83331e+08	3.58362e+08	7.12405e+08	8.11056e+08	660384	4.06606e+08	3.41047e+08	8.43361e+08	1.03903e+09	8.37415e+08	1.34607e+09	9.88761e+08	1.52988e+07	7.75435e+08	743042	4.67471e+08	4.19067e+08	5.25612e+08	1.3955e+09	2.04653e+08	7.50696e+08	5.30092e+08	3.79461e+08	4.00786e+08	1.48565e+08	721124	5.06079e+08	5.04757e+08	1.20153e+09
	Checked	Structure	Name	Formula	Molecular Weight	CSID	# References
	FALSE	#352038 -OEChem-02070708242D 38 37 0 1 0 0 0 0 0999 V2000 6.0010 -1.7500 0.0000 O 0 0 0 0 0 0 0 0 0 0 0 0 2.5369 -0.7500 0.0000 O 0 0 0 0 0 0 0 0 0 0 0 0 3.4030 0.7500 0.0000 O 0 0 0 0 0 0 0 0 0 0 0 0 5.1350 -0.2500 0.0000 N 0 0 0 0 0 0 0 0 0 0 0 0 7.7331 -0.7500 0.0000 N 0 0 0 0 0 0 0 0 0 0 0 0 6.8671 0.7500 0.0000 C 0 0 0 0 0 0 0 0 0 0 0 0 6.8671 -0.2500 0.0000 C 0 0 3 0 0 0 0 0 0 0 0 0 7.7331 …	Leu-Val	C11 H22 N2 O3	230.163	312585	53
	FALSE	#352039 -OEChem-02070708242D 38 37 0 1 0 0 0 0 0999 V2000 6.0010 -0.7500 0.0000 O 0 0 0 0 0 0 0 0 0 0 0 0 2.5369 0.2500 0.0000 O 0 0 0 0 0 0 0 0 0 0 0 0 3.4030 1.7500 0.0000 O 0 0 0 0 0 0 0 0 0 0 0 0 5.1350 0.7500 0.0000 N 0 0 0 0 0 0 0 0 0 0 0 0 7.7331 0.2500 0.0000 N 0 0 0 0 0 0 0 0 0 0 0 0 4.2690 -0.7500 0.0000 C 0 0 0 0 0 0 0 0 0 0 0 0 4.2690 0.2500 0.0000 C 0 0 3 0 0 0 0 0 0 0 0 0 3.4030 -1.…	Val-Leu	C11 H22 N2 O3	230.163	312586	27
	FALSE	#435949 -OEChem-02070708252D 38 37 0 1 0 0 0 0 0999 V2000 6.0010 -1.1550 0.0000 O 0 0 0 0 0 0 0 0 0 0 0 0 2.5369 -0.1550 0.0000 O 0 0 0 0 0 0 0 0 0 0 0 0 3.4030 1.3450 0.0000 O 0 0 0 0 0 0 0 0 0 0 0 0 5.1350 0.3450 0.0000 N 0 0 0 0 0 0 0 0 0 0 0 0 6.8671 1.3450 0.0000 N 0 0 0 0 0 0 0 0 0 0 0 0 7.7331 -0.1550 0.0000 C 0 0 3 0 0 0 0 0 0 0 0 0 6.8671 0.3450 0.0000 C 0 0 3 0 0 0 0 0 0 0 0 0 4.2690 -0…	Ile-val	C11 H22 N2 O3	230.163	385545	13
	FALSE	#5246012 -OEChem-02070710102D 38 37 0 1 0 0 0 0 0999 V2000 4.2690 1.2500 0.0000 O 0 0 0 0 0 0 0 0 0 0 0 0 6.8671 1.7500 0.0000 O 0 5 0 0 0 0 0 0 0 0 0 0 5.1350 1.7500 0.0000 O 0 0 0 0 0 0 0 0 0 0 0 0 5.1350 -0.2500 0.0000 N 0 0 0 0 0 0 0 0 0 0 0 0 2.5369 0.2500 0.0000 N 0 3 0 0 0 0 0 0 0 0 0 0 6.8671 -0.2500 0.0000 C 0 0 3 0 0 0 0 0 0 0 0 0 3.4030 -0.2500 0.0000 C 0 0 3 0 0 0 0 0 0 0 0 0 6.0010 0…	val-ile	C11 H22 N2 O3	230.163	4414314	6
FALSE			No results	No results		173.888	0.925	1.4242e+09	0	No MS2	66163.5	71648.5	78888.1	5.65473e+06	5.82096e+06	5.86243e+06	4.45456e+06	5.39141e+06	5.11804e+06	5.16241e+06	1.11789e+07	4.92853e+06	5.63711e+06	6.8507e+06	472317	5.25264e+06	4.79032e+06	4.98298e+06	5.29099e+06	5.24555e+06	5.52431e+06	7.68446e+06	5.6647e+06	4.95281e+06	476316	5.53681e+06	5.84982e+06	5.59763e+06	8.04234e+06	1.4242e+09	5.05685e+06	4.73877e+06	5.1195e+06	6.19133e+06	4.95024e+06	523859	6.15211e+06	5.54466e+06	8.42811e+06
	Checked	Structure	Name	Formula	Molecular Weight	CSID	# References
FALSE	N-Hydroxydecanamide	C10 H21 N O2	Full match	Full match		187.157	10.597	1.42241e+09	1	No MS2	276208	16803.9	345115	371702	487980	1.05926e+07	4.14832e+06	3.48116e+06	2.00898e+06	4.26557e+06	1.0916e+06	2.96769e+06	5.08298e+06	217668	165021	5.16868e+06	6.60008e+06	2.54512e+06	3.32675e+06	2.77218e+06	5.56446e+06	3.12476e+07	4.63891e+06	6.85972e+06	186766	978714	2.44931e+06	4.75553e+06	3.92433e+06	3.22901e+06	2.63641e+06	1.81175e+06	4.38553e+06	3.68812e+06	2.45113e+06	174341	3.23834e+06	4.28457e+06	6.39629e+06
	Checked	Structure	Name	Formula	Molecular Weight	CSID	# References
	FALSE	# ACD/Labs04281711462D 13 12 0 0 0 0 0 0 0 0 1 V2000 2.3643 0.0000 0.0000 O 0 0 0 0 0 0 0 0 0 0 0 0 0.0000 -1.3347 0.0000 O 0 0 0 0 0 0 0 0 0 0 0 0 1.2203 -1.9957 0.0000 N 0 0 0 0 0 0 0 0 0 0 0 0 2.3643 -1.3347 0.0000 C 0 0 0 0 0 0 0 0 0 0 0 0 3.5210 -1.9829 0.0000 C 0 0 0 0 0 0 0 0 0 0 0 0 4.6650 -1.3220 0.0000 C 0 0 0 0 0 0 0 0 0 0 0 0 5.8217 -1.9829 0.0000 C 0 0 0 0 0 0 0 0 0 0 0 0 6.9657 -1.3…	N-Hydroxydecanamide	C10 H21 N O2	187.157	125940	43
FALSE	EJ4025000	C8 H18 N2 O	Full match	Full match		158.142	2.48	1.4218e+09	1	No MS2	1.38467e+06	27667.8	28881.8	2.93087e+08	3.05148e+08	5.01617e+08	1.23179e+07	7.11888e+08	1.55017e+07	2.71663e+07	7.91094e+07	3.01222e+07	1.3064e+09	8.11885e+06	146402	2.42779e+08	1.79484e+08	3.23266e+07	5.40074e+07	4.8171e+08	4.74786e+07	1.13089e+07	4.3159e+07	2.74513e+07	154002	2.70508e+08	2.83762e+08	1.36344e+09	6.81427e+08	1.28726e+07	9.66093e+07	1.44675e+07	2.36704e+08	1.4218e+09	1.85101e+08	155484	2.65023e+08	2.71701e+08	5.38509e+07
	Checked	Structure	Name	Formula	Molecular Weight	CSID	# References
	FALSE	# ACD/Labs04281711452D 11 10 0 0 0 0 0 0 0 0 1 V2000 5.7519 0.0000 0.0000 O 0 0 0 0 0 0 0 0 0 0 0 0 4.6163 -1.9942 0.0000 N 0 0 0 0 0 0 0 0 0 0 0 0 4.6163 -0.6647 0.0000 N 0 0 0 0 0 0 0 0 0 0 0 0 3.4622 -2.6590 0.0000 C 0 0 0 0 0 0 0 0 0 0 0 0 5.7704 -2.6590 0.0000 C 0 0 0 0 0 0 0 0 0 0 0 0 2.3081 -1.9942 0.0000 C 0 0 0 0 0 0 0 0 0 0 0 0 6.9244 -1.9942 0.0000 C 0 0 0 0 0 0 0 0 0 0 0 0 1.1541 -2.6…	EJ4025000	C8 H18 N2 O	158.142	12954	606
FALSE			No results	No results		71.0741	1.097	1.39946e+09	0	No MS2	13161.8	14880.3	15392.9	5.19396e+08	5.05537e+08	2.24256e+07	1.16482e+07	2.02248e+07	5.27756e+08	2.11041e+07	1.82825e+07	1.64717e+07	3.32244e+07	1.64836e+07	1.45301e+06	2.26459e+07	4.49535e+08	1.8777e+07	3.43728e+07	1.44755e+07	2.23269e+07	2.73375e+07	1.03699e+09	2.58516e+08	1.93394e+06	2.38371e+08	5.87257e+08	1.94222e+07	8.7728e+08	6.56964e+07	2.91548e+07	1.15182e+07	1.25958e+07	1.9076e+07	1.94835e+07	1.56317e+06	1.03631e+07	5.85736e+08	3.77803e+07
	Checked	Structure	Name	Formula	Molecular Weight	CSID	# References
FALSE	1,1-Diethyl-3-oxo-2-triazanolate	C4 H10 N3 O2	No results	Full match		132.077	9.069	1.3775e+09	1	No MS2	353973	35393.3	343089	4.43474e+08	4.14209e+08	9.88656e+06	8.40387e+06	1.5933e+07	8.14353e+06	9.77663e+07	1.66414e+08	7.12253e+07	6.63885e+06	1.64477e+08	551360	3.20348e+08	2.91818e+08	2.73542e+06	4.80574e+07	7.32559e+07	8.70558e+07	1.10491e+08	5.53886e+08	8.10641e+07	669522	3.79277e+08	3.23251e+08	7.49958e+06	2.05806e+08	4.17135e+07	8.39531e+07	9.04407e+06	5.08439e+06	9.13244e+06	8.17874e+08	501527	3.69934e+08	3.2044e+08	8.98356e+07
	Checked	Structure	Name	Formula	Molecular Weight	CSID	# References
	FALSE	# ACD/Labs04111411492D 9 8 0 0 0 0 0 0 0 0 2 V2000 0.0000 -1.9971 0.0000 C 0 0 0 0 0 0 0 0 0 0 0 0 1.1511 -1.3295 0.0000 C 0 0 0 0 0 0 0 0 0 0 0 0 2.3021 -1.9971 0.0000 N 0 0 0 0 0 0 0 0 0 0 0 0 2.3021 -3.3266 0.0000 C 0 0 0 0 0 0 0 0 0 0 0 0 3.4532 -3.9884 0.0000 C 0 0 0 0 0 0 0 0 0 0 0 0 3.4532 -1.3295 0.0000 N 0 0 0 0 0 0 0 0 0 0 0 0 4.6042 -1.9971 0.0000 N 0 0 0 0 0 0 0 0 0 0 0 0 5.7553 -1.32…	1,1-Diethyl-3-oxo-2-triazanolate	C4 H10 N3 O2	132.077	96916	38
FALSE			No results	No results		353.348	12.656	1.3623e+09	0	No MS2	146784	11706.9	160509	1.17697e+08	1.14434e+08	913724	4.84384e+06	628686	291183	2.85033e+06	1.3623e+09	492900	1.19445e+06	8.21813e+08	576374	7.66526e+07	7.53947e+07	714793	7.0407e+07	2.10197e+07	1.38156e+06	1.17843e+09	354250	355819	859259	1.127e+08	1.03291e+08	534666	8.50972e+08	221676	308077	387190	731676	439372	318735	573699	1.06037e+08	9.22088e+07	1.17319e+09
	Checked	Structure	Name	Formula	Molecular Weight	CSID	# References
FALSE			No results	No results		74.0374	3.686	1.33771e+09	0	No MS2	1.36574e+06	33656.4	32875.6	3.03705e+08	2.97274e+08	2.19138e+08	3.71375e+08	5.04019e+08	9.77813e+08	7.17727e+08	1.34033e+08	8.20448e+08	4.12464e+08	9.3661e+08	239818	7.26554e+08	8.16959e+08	3.88503e+08	7.5771e+08	6.9546e+08	4.20979e+08	3.40294e+08	3.90188e+08	9.72652e+08	170736	4.00622e+08	5.2444e+08	4.63978e+08	2.49649e+08	1.17885e+08	4.98681e+08	4.99476e+08	5.25129e+08	2.07952e+08	5.24927e+08	274474	5.80148e+08	5.75791e+08	4.12234e+08
	Checked	Structure	Name	Formula	Molecular Weight	CSID	# References
FALSE	Cadaverine	C5 H14 N2	Full match	Full match		102.116	0.924	1.33419e+09	3	No MS2	33648.3	36773.4	41001.7	5.62943e+08	5.3793e+08	4.59135e+08	2.3051e+06	3.36535e+08	2.68229e+06	2.86111e+06	1.33419e+09	2.41932e+06	5.38576e+08	4.84766e+07	345758	2.38683e+08	2.2122e+08	5.13603e+06	3.37034e+08	3.51157e+08	8.8523e+06	1.30158e+08	6.24843e+08	3.08568e+06	243319	5.01794e+08	4.21602e+08	6.39403e+08	9.84234e+08	2.0059e+06	8.82277e+06	2.10762e+06	2.25024e+08	6.37387e+08	2.27375e+08	266048	3.28026e+08	3.49526e+08	6.03952e+08
	Checked	Structure	Name	Formula	Molecular Weight	CSID	# References
	FALSE	# ACD/Labs03221914022D 7 6 0 0 0 0 0 0 0 0 1 V2000 3.4575 -0.6638 0.0000 C 0 0 0 0 0 0 0 0 0 0 0 0 2.3027 0.0000 0.0000 C 0 0 0 0 0 0 0 0 0 0 0 0 1.1548 -0.6638 0.0000 C 0 0 0 0 0 0 0 0 0 0 0 0 0.0000 0.0000 0.0000 N 0 0 0 0 0 0 0 0 0 0 0 0 4.6122 0.0000 0.0000 C 0 0 0 0 0 0 0 0 0 0 0 0 5.7601 -0.6638 0.0000 C 0 0 0 0 0 0 0 0 0 0 0 0 6.9149 0.0000 0.0000 N 0 0 0 0 0 0 0 0 0 0 0 0 1 2 1 0 0 0 0 1 …	Cadaverine	C5 H14 N2	102.116	13866593	1771
	FALSE	# ACD/Labs12170914222D 7 6 0 0 0 0 0 0 0 0 1 V2000 2.3144 0.0000 0.0000 N 0 0 0 0 0 0 0 0 0 0 0 0 5.7572 -0.6506 0.0000 N 0 0 0 0 0 0 0 0 0 0 0 0 1.1629 -0.6851 0.0000 C 0 0 0 0 0 0 0 0 0 0 0 0 3.4428 -0.6793 0.0000 C 0 0 0 0 0 0 0 0 0 0 0 0 4.6057 0.0000 0.0000 C 0 0 0 0 0 0 0 0 0 0 0 0 0.0000 -0.0058 0.0000 C 0 0 0 0 0 0 0 0 0 0 0 0 1.1687 -1.9920 0.0000 C 0 0 0 0 0 0 0 0 0 0 0 0 1 3 1 0 0 0 0 …	2-isopropylaminoethylamine	C5 H14 N2	102.116	79480	120
	FALSE	# ACD/Labs04221415492D 7 6 0 0 0 0 0 0 0 0 1 V2000 1.1389 -0.8076 0.0000 N 0 0 0 0 0 0 0 0 0 0 0 0 6.9025 0.0000 0.0000 N 0 0 0 0 0 0 0 0 0 0 0 0 3.6721 -0.6281 0.0000 C 0 0 0 0 0 0 0 0 0 0 0 0 2.6022 0.0000 0.0000 C 0 0 0 0 0 0 0 0 0 0 0 0 4.7558 0.0000 0.0000 C 0 0 0 0 0 0 0 0 0 0 0 0 5.8257 -0.6281 0.0000 C 0 0 0 0 0 0 0 0 0 0 0 0 0.0000 -0.1242 0.0000 C 0 0 0 0 0 0 0 0 0 0 0 0 1 4 1 0 0 0 0 1…	N-methylputrescine	C5 H14 N2	102.116	388845	80
FALSE		C3 H4 O2 S2	Full match	No results		135.965	6.776	1.31378e+09	0	No MS2	1.33523e+06	28796.6	27488.7	697400	560251	293771	213448	202379	184341	406392	334286	201495	249792	252350	161727	753101	663833	235717	257435	217232	313334	322163	5.66611e+06	253290	164115	603516	731319	266086	312538	1.31378e+09	248097	195291	242843	287908	3.19814e+07	164084	907896	743350	266313
	Checked	Structure	Name	Formula	Molecular Weight	CSID	# References
FALSE		C22 H40 N2 O	Full match	No results		348.313	11.979	1.31224e+09	0	No MS2	200554	12489.5	193896	7.86553e+07	8.85274e+07	535875	212450	522074	366131	889264	1.31224e+09	306290	777157	8.38753e+08	487418	6.27754e+07	5.69281e+07	415351	4.00579e+07	1.71118e+07	949043	9.45889e+08	346015	769122	571054	9.18726e+07	7.96355e+07	733108	8.29724e+08	271389	389578	225312	262969	618688	377033	534244	8.00398e+07	8.17268e+07	9.6604e+08
	Checked	Structure	Name	Formula	Molecular Weight	CSID	# References
FALSE		C20 H40 O6	Full match	No results		376.282	11.802	1.29764e+09	0	No MS2	110253	14231.9	150878	1.25259e+08	1.15636e+08	259916	191179	229081	210457	257549	1.29764e+09	213441	246185	1.06347e+09	226434	9.25044e+07	9.73585e+07	250248	2.11694e+08	9.92013e+07	292446	8.33929e+08	249494	251827	235489	1.20717e+08	1.29632e+08	272630	1.0185e+09	282842	263625	217364	256882	299986	241010	246291	1.31271e+08	1.2897e+08	1.15172e+09
	Checked	Structure	Name	Formula	Molecular Weight	CSID	# References
FALSE	Palmitamide	C16 H33 N O	Full match	Full match		255.256	15.207	1.29463e+09	1	No MS2	103002	11851.7	86775.7	2.40673e+08	1.96271e+08	1.19514e+08	1.59649e+08	4.6232e+07	1.25244e+07	2.92843e+08	1.29463e+09	2.04918e+07	7.94507e+07	5.51724e+08	1.94733e+07	1.44641e+08	1.09e+08	5.42158e+07	7.087e+08	1.79037e+08	5.83666e+07	9.04439e+08	4.24937e+07	4.16141e+07	2.34402e+07	1.84717e+08	1.50284e+08	8.05679e+07	9.36228e+08	4.73423e+07	4.6319e+07	4.34175e+07	2.13033e+08	7.69363e+07	3.9557e+07	1.72566e+07	2.00881e+08	1.70836e+08	8.67468e+08
	Checked	Structure	Name	Formula	Molecular Weight	CSID	# References
	FALSE	# ACD/Labs04281712162D 18 17 0 0 0 0 0 0 0 0 1 V2000 18.4416 -1.9917 0.0000 N 0 0 0 0 0 0 0 0 0 0 0 0 17.2982 -1.3278 0.0000 C 0 0 0 0 0 0 0 0 0 0 0 0 16.1364 -1.9917 0.0000 C 0 0 0 0 0 0 0 0 0 0 0 0 14.9930 -1.3278 0.0000 C 0 0 0 0 0 0 0 0 0 0 0 0 13.8312 -1.9917 0.0000 C 0 0 0 0 0 0 0 0 0 0 0 0 12.6878 -1.3278 0.0000 C 0 0 0 0 0 0 0 0 0 0 0 0 17.2982 0.0000 0.0000 O 0 0 0 0 0 0 0 0 0 0 0 0 11.5…	Palmitamide	C16 H33 N O	255.256	62629	141
FALSE		C34 H52 N8 O6	Full match	No results		668.398	11.357	1.28748e+09	0	No MS2	103323	15731.2	100465	8.05182e+07	9.72609e+07	337933	255063	253277	286439	372655	1.28748e+09	342092	362621	3.40218e+08	237812	6.77562e+07	7.41665e+07	295173	1.44418e+07	9.86944e+07	496618	6.93313e+08	300784	436900	261774	8.49359e+07	9.72468e+07	390216	1.10868e+09	312072	448242	277424	275509	335910	295330	258985	9.64334e+07	1.08134e+08	7.77262e+08
	Checked	Structure	Name	Formula	Molecular Weight	CSID	# References
FALSE		C22 H40 O11	Full match	No results		480.257	11.126	1.26284e+09	0	No MS2	624208	48440.7	775802	3.74925e+08	3.43966e+08	975305	722964	710420	660783	979217	1.11009e+09	730774	788242	9.58754e+08	664341	2.77625e+08	2.47065e+08	788447	3.38561e+08	6.89546e+07	916692	1.25512e+09	758666	838117	712587	3.65856e+08	3.46651e+08	916993	1.26284e+09	1.04279e+06	909536	736986	825046	1.09661e+06	782087	687505	3.42093e+08	3.50498e+08	1.08513e+09
	Checked	Structure	Name	Formula	Molecular Weight	CSID	# References
FALSE			No results	No results		165.078	5.064	1.25047e+09	0	No MS2	525588	49851.7	466888	8.8313e+08	7.85343e+08	5.10793e+08	6.20575e+08	2.72816e+08	6.89737e+08	8.92685e+08	1.10222e+09	7.88984e+08	3.29125e+08	1.0281e+09	892033	8.7127e+08	8.1894e+08	6.67934e+08	7.19018e+08	5.74999e+08	8.78615e+08	9.11548e+08	1.21686e+09	9.4201e+08	1.02619e+06	8.63986e+08	8.97426e+08	2.02749e+08	9.87294e+08	2.30116e+08	7.6267e+08	6.88093e+08	2.92104e+08	1.75498e+08	6.31012e+08	555304	9.05143e+08	9.11464e+08	9.8432e+08
	Checked	Structure	Name	Formula	Molecular Weight	CSID	# References
FALSE	Oleic acid	C18 H34 O2	Full match	Full match		282.255	14.313	1.24464e+09	11	No MS2	92625.4	11636.2	101079	1.05178e+08	1.12324e+08	8.68317e+07	3.97544e+08	3.20563e+07	6.0009e+07	5.47536e+08	1.29683e+08	2.77656e+07	4.38613e+07	1.09364e+08	688837	7.50923e+07	5.29695e+07	9.68737e+07	4.0731e+07	7.21966e+07	7.4609e+07	7.81208e+07	1.81479e+07	2.45252e+07	630306	9.431e+07	1.04429e+08	8.02573e+07	1.95316e+08	5.23365e+07	4.10473e+07	8.36739e+07	4.57195e+08	1.62161e+07	2.03439e+07	849480	9.01355e+07	1.08018e+08	8.19919e+07
	Checked	Structure	Name	Formula	Molecular Weight	CSID	# References
	FALSE	# ACD/Labs04281710392D 20 19 0 0 0 0 0 0 0 0 1 V2000 1.1481 0.0000 0.0000 O 0 0 0 0 0 0 0 0 0 0 0 0 0.0000 -2.0039 0.0000 O 0 0 0 0 0 0 0 0 0 0 0 0 1.1481 -1.3359 0.0000 C 0 0 0 0 0 0 0 0 0 0 0 0 2.2961 -2.0039 0.0000 C 0 0 0 0 0 0 0 0 0 0 0 0 3.4442 -1.3359 0.0000 C 0 0 0 0 0 0 0 0 0 0 0 0 4.5922 -2.0039 0.0000 C 0 0 0 0 0 0 0 0 0 0 0 0 5.7403 -1.3359 0.0000 C 0 0 0 0 0 0 0 0 0 0 0 0 6.8884 -2.0…	Oleic acid	C18 H34 O2	282.256	393217	874
	FALSE	# ACD/Labs04281713052D 20 19 0 0 0 0 0 0 0 0 1 V2000 1.1609 0.0000 0.0000 O 0 0 0 0 0 0 0 0 0 0 0 0 0.0000 -2.0108 0.0000 O 0 0 0 0 0 0 0 0 0 0 0 0 1.1609 -1.3474 0.0000 C 0 0 0 0 0 0 0 0 0 0 0 0 2.3010 -2.0108 0.0000 C 0 0 0 0 0 0 0 0 0 0 0 0 3.4618 -1.3474 0.0000 C 0 0 0 0 0 0 0 0 0 0 0 0 4.6020 -2.0108 0.0000 C 0 0 0 0 0 0 0 0 0 0 0 0 5.7628 -1.3474 0.0000 C 0 0 0 0 0 0 0 0 0 0 0 0 6.9029 -2.0…	Elaidic Acid	C18 H34 O2	282.256	553123	614
	FALSE	# ACD/Labs04281711072D 20 19 0 0 0 0 0 0 0 0 1 V2000 1.1359 0.0000 0.0000 O 0 0 0 0 0 0 0 0 0 0 0 0 0.0000 -1.9826 0.0000 O 0 0 0 0 0 0 0 0 0 0 0 0 1.1359 -1.3011 0.0000 C 0 0 0 0 0 0 0 0 0 0 0 0 2.2924 -1.9826 0.0000 C 0 0 0 0 0 0 0 0 0 0 0 0 3.4283 -1.3011 0.0000 C 0 0 0 0 0 0 0 0 0 0 0 0 4.5848 -1.9826 0.0000 C 0 0 0 0 0 0 0 0 0 0 0 0 5.7207 -1.3011 0.0000 C 0 0 0 0 0 0 0 0 0 0 0 0 6.8772 -1.9…	trans-Vaccenic acid	C18 H34 O2	282.256	4444571	322
	FALSE	# ACD/Labs04281711312D 20 19 0 0 0 0 0 0 0 0 1 V2000 17.2426 -2.0001 0.0000 O 0 0 0 0 0 0 0 0 0 0 0 0 16.0874 -1.3277 0.0000 C 0 0 0 0 0 0 0 0 0 0 0 0 14.9494 -2.0001 0.0000 C 0 0 0 0 0 0 0 0 0 0 0 0 13.7941 -1.3277 0.0000 C 0 0 0 0 0 0 0 0 0 0 0 0 12.6389 -2.0001 0.0000 C 0 0 0 0 0 0 0 0 0 0 0 0 11.5008 -1.3277 0.0000 C 0 0 0 0 0 0 0 0 0 0 0 0 10.3456 -2.0001 0.0000 C 0 0 0 0 0 0 0 0 0 0 0 0 9.1…	cis-Vaccenic acid	C18 H34 O2	282.256	4445888	164
	FALSE	# ACD/Labs04111411492D 20 19 0 0 0 0 0 0 0 0 1 V2000 19.5847 -1.3278 0.0000 C 0 0 0 0 0 0 0 0 0 0 0 0 18.4437 -1.9917 0.0000 C 0 0 0 0 0 0 0 0 0 0 0 0 17.2819 -1.3278 0.0000 C 0 0 0 0 0 0 0 0 0 0 0 0 16.1408 -1.9917 0.0000 C 0 0 0 0 0 0 0 0 0 0 0 0 14.9790 -1.3278 0.0000 C 0 0 0 0 0 0 0 0 0 0 0 0 13.8379 -1.9917 0.0000 C 0 0 0 0 0 0 0 0 0 0 0 0 12.6761 -1.3278 0.0000 C 0 0 0 0 0 0 0 0 0 0 0 0 11.…	(6E)-6-Octadecenoic acid	C18 H34 O2	282.256	4445881	95
	FALSE	# ACD/Labs04281711132D 20 19 0 0 0 0 0 0 0 0 1 V2000 1.1348 0.0000 0.0000 O 0 0 0 0 0 0 0 0 0 0 0 0 0.0000 -1.9754 0.0000 O 0 0 0 0 0 0 0 0 0 0 0 0 1.1348 -1.3240 0.0000 C 0 0 0 0 0 0 0 0 0 0 0 0 2.2906 -1.9754 0.0000 C 0 0 0 0 0 0 0 0 0 0 0 0 3.4255 -1.3240 0.0000 C 0 0 0 0 0 0 0 0 0 0 0 0 4.5813 -1.9754 0.0000 C 0 0 0 0 0 0 0 0 0 0 0 0 5.7161 -1.3240 0.0000 C 0 0 0 0 0 0 0 0 0 0 0 0 6.8719 -1.9…	Petroselinic acid	C18 H34 O2	282.256	4444569	88
	FALSE	#5364759 -OEChem-02070710092D 54 53 0 0 0 0 0 0 0999 V2000 3.7321 0.4400 0.0000 O 0 0 0 0 0 0 0 0 0 0 0 0 4.5981 -1.0600 0.0000 O 0 0 0 0 0 0 0 0 0 0 0 0 8.0622 -0.0600 0.0000 C 0 0 0 0 0 0 0 0 0 0 0 0 8.9282 0.4400 0.0000 C 0 0 0 0 0 0 0 0 0 0 0 0 7.1962 0.4400 0.0000 C 0 0 0 0 0 0 0 0 0 0 0 0 9.7942 -0.0600 0.0000 C 0 0 0 0 0 0 0 0 0 0 0 0 6.3301 -0.0600 0.0000 C 0 0 0 0 0 0 0 0 0 0 0 0 10.6603…	Ethyl (9E)-9-hexadecenoate	C18 H34 O2	282.256	4516898	43
	FALSE	#6161490 -OEChem-02070710242D 54 53 0 0 0 0 0 0 0999 V2000 2.5369 0.4400 0.0000 O 0 0 0 0 0 0 0 0 0 0 0 0 3.4030 -1.0600 0.0000 O 0 0 0 0 0 0 0 0 0 0 0 0 8.5991 -0.0600 0.0000 C 0 0 0 0 0 0 0 0 0 0 0 0 9.4651 0.4400 0.0000 C 0 0 0 0 0 0 0 0 0 0 0 0 7.7331 0.4400 0.0000 C 0 0 0 0 0 0 0 0 0 0 0 0 10.3312 -0.0600 0.0000 C 0 0 0 0 0 0 0 0 0 0 0 0 6.8671 -0.0600 0.0000 C 0 0 0 0 0 0 0 0 0 0 0 0 11.197…	13-Octadecenoic acid	C18 H34 O2	282.256	4827881	35
	FALSE	#5312441 -OEChem-02070710132D 54 53 0 0 0 0 0 0 0999 V2000 2.5369 -0.7500 0.0000 O 0 0 0 0 0 0 0 0 0 0 0 0 3.4030 -2.2500 0.0000 O 0 0 0 0 0 0 0 0 0 0 0 0 8.5991 -1.2500 0.0000 C 0 0 0 0 0 0 0 0 0 0 0 0 9.4651 -0.7500 0.0000 C 0 0 0 0 0 0 0 0 0 0 0 0 7.7331 -0.7500 0.0000 C 0 0 0 0 0 0 0 0 0 0 0 0 10.3312 -1.2500 0.0000 C 0 0 0 0 0 0 0 0 0 0 0 0 6.8671 -1.2500 0.0000 C 0 0 0 0 0 0 0 0 0 0 0 0 11.…	(13Z)-octadecenoic acid	C18 H34 O2	282.256	4471866	32
	FALSE	# ACD/Labs04221415492D 20 20 0 0 0 0 0 0 0 0 1 V2000 15.5405 0.0000 0.0000 O 0 0 0 0 0 0 0 0 0 0 0 0 16.6923 -2.0031 0.0000 O 0 0 0 0 0 0 0 0 0 0 0 0 2.8544 -2.0031 0.0000 C 0 0 0 0 0 0 0 0 0 0 0 0 2.8878 -3.3218 0.0000 C 0 0 0 0 0 0 0 0 0 0 0 0 1.7527 -1.2519 0.0000 C 0 0 0 0 0 0 0 0 0 0 0 0 4.0061 -1.3354 0.0000 C 0 0 0 0 0 0 0 0 0 0 0 0 1.9864 -4.2398 0.0000 C 0 0 0 0 0 0 0 0 0 0 0 0 0.4841 -1…	11-Cycloheptylundecanoic acid	C18 H34 O2	282.256	391768	8
	FALSE	#5282755 -OEChem-02070710102D 54 53 0 0 0 0 0 0 0999 V2000 2.5369 -3.0000 0.0000 O 0 0 0 0 0 0 0 0 0 0 0 0 3.4030 -4.5000 0.0000 O 0 0 0 0 0 0 0 0 0 0 0 0 11.1972 1.0000 0.0000 C 0 0 0 0 0 0 0 0 0 0 0 0 11.1972 0.0000 0.0000 C 0 0 0 0 0 0 0 0 0 0 0 0 12.0632 1.5000 0.0000 C 0 0 0 0 0 0 0 0 0 0 0 0 10.3312 -0.5000 0.0000 C 0 0 0 0 0 0 0 0 0 0 0 0 12.0632 2.5000 0.0000 C 0 0 0 0 0 0 0 0 0 0 0 0 10.…	(7Z)-7-Octadecenoic acid	C18 H34 O2	282.256	4445882	8
FALSE	Succimer	C4 H6 O4 S2	Full match	Full match		181.971	6.788	1.23056e+09	2	No MS2	2.72654e+06	58802.8	56132	638800	721506	614068	435861	413258	376425	531867	682612	424509	510075	515299	330247	639034	630700	481336	525683	443589	639829	657858	3.67411e+06	517219	339172	811073	770658	524681	638204	1.23056e+09	506615	409150	495886	587909	2.67711e+07	344318	815901	744420	529711
	Checked	Structure	Name	Formula	Molecular Weight	CSID	# References
	FALSE	#9354 -OEChem-02070708202D 16 15 0 1 0 0 0 0 0999 V2000 4.2690 -1.2500 0.0000 S 0 0 0 0 0 0 0 0 0 0 0 0 5.1350 1.2500 0.0000 S 0 0 0 0 0 0 0 0 0 0 0 0 2.5369 -0.2500 0.0000 O 0 0 0 0 0 0 0 0 0 0 0 0 6.8671 0.2500 0.0000 O 0 0 0 0 0 0 0 0 0 0 0 0 3.4030 1.2500 0.0000 O 0 0 0 0 0 0 0 0 0 0 0 0 6.0010 -1.2500 0.0000 O 0 0 0 0 0 0 0 0 0 0 0 0 4.2690 -0.2500 0.0000 C 0 0 3 0 0 0 0 0 0 0 0 0 5.1350 0.2…	Succimer	C4 H6 O4 S2	181.971	8988	337
	FALSE	# ACD/Labs04281710392D 10 9 0 0 1 0 0 0 0 0 1 V2000 2.3087 -3.3278 0.0000 S 0 0 0 0 0 0 0 0 0 0 0 0 3.4487 0.0000 0.0000 S 0 0 0 0 0 0 0 0 0 0 0 0 1.1457 -0.0058 0.0000 O 0 0 0 0 0 0 0 0 0 0 0 0 0.0000 -2.0036 0.0000 O 0 0 0 0 0 0 0 0 0 0 0 0 4.6117 -3.3221 0.0000 O 0 0 0 0 0 0 0 0 0 0 0 0 5.7575 -1.3242 0.0000 O 0 0 0 0 0 0 0 0 0 0 0 0 2.3087 -1.9978 0.0000 C 0 0 0 0 0 0 0 0 0 0 0 0 3.4487 -1.33…	meso-Succimer	C4 H6 O4 S2	181.971	2006502	257
FALSE			No results	No results		293.931	1.034	1.20768e+09	0	No MS2	28286.3	25491.3	251112	1.01902e+06	910324	912015	590840	740802	666396	676283	1.055e+06	695995	738562	892631	267398	787002	694741	696157	806267	716465	866769	1.19025e+06	775112	742695	302423	951449	900313	853485	1.14577e+06	1.20768e+09	756311	638066	717575	877917	830845	287975	915704	862263	983267
	Checked	Structure	Name	Formula	Molecular Weight	CSID	# References
FALSE	1-(beta-D-ribofuranosyl)thymine	C10 H14 N2 O6	Full match	Full match		258.085	1.748	1.19515e+09	3	No MS2	72831.3	74489	338197	2.42183e+08	2.38748e+08	5.36417e+06	2.6186e+06	5.61357e+06	4.7744e+06	6.73888e+06	1.06386e+08	4.49835e+06	6.6816e+06	9.10174e+08	555274	1.7798e+08	1.84313e+08	3.79704e+06	3.3423e+06	3.38418e+06	6.52229e+06	2.96979e+06	1.08056e+09	7.45574e+06	614309	2.19714e+08	2.23022e+08	7.54143e+06	4.13635e+07	1.6886e+06	4.81768e+06	4.63259e+06	5.20444e+06	6.30891e+06	5.73126e+06	610023	2.25896e+08	1.86853e+08	3.42672e+06
	Checked	Structure	Name	Formula	Molecular Weight	CSID	# References
	FALSE	# ACD/Labs04281712332D 18 19 0 0 1 0 0 0 0 0 1 V2000 2.7189 -5.2566 0.0000 C 0 0 0 0 0 0 0 0 0 0 0 0 2.0483 -6.4076 0.0000 O 0 0 0 0 0 0 0 0 0 0 0 0 4.0421 -5.2566 0.0000 C 0 0 0 0 0 0 0 0 0 0 0 0 4.7128 -6.4076 0.0000 O 0 0 0 0 0 0 0 0 0 0 0 0 4.4590 -3.9878 0.0000 C 0 0 0 0 0 0 0 0 0 0 0 0 2.3020 -3.9878 0.0000 C 0 0 0 0 0 0 0 0 0 0 0 0 3.3805 -3.2083 0.0000 O 0 0 0 0 0 0 0 0 0 0 0 0 5.6101 -3.…	1-(beta-D-ribofuranosyl)thymine	C10 H14 N2 O6	258.085	393058	183
	FALSE	# ACD/Labs04281710402D 18 19 0 0 1 0 0 0 0 0 1 V2000 5.0707 -4.4622 0.0000 O 0 0 0 0 0 0 0 0 0 0 0 0 3.9129 -5.1299 0.0000 C 0 0 0 0 0 0 0 0 0 0 0 0 3.9129 -6.4652 0.0000 N 0 0 0 0 0 0 0 0 0 0 0 0 2.7636 -7.1244 0.0000 C 0 0 0 0 0 0 0 0 0 0 0 0 1.6142 -6.4652 0.0000 C 0 0 0 0 0 0 0 0 0 0 0 0 0.4648 -7.1244 0.0000 C 0 0 0 0 0 0 0 0 0 0 0 0 1.6142 -5.1299 0.0000 C 0 0 0 0 0 0 0 0 0 0 0 0 2.7636 -4.…	spongothymidine	C10 H14 N2 O6	258.085	58560	46
	FALSE	# ACD/Labs04221415492D 18 19 0 0 1 0 0 0 0 0 1 V2000 2.4901 -1.6532 0.0000 O 0 0 0 0 0 0 0 0 0 0 0 0 3.8850 -4.6393 0.0000 O 0 0 0 0 0 0 0 0 0 0 0 0 1.1056 -4.6393 0.0000 O 0 0 0 0 0 0 0 0 0 0 0 0 0.0000 -0.7439 0.0000 O 0 0 0 0 0 0 0 0 0 0 0 0 8.1936 -3.6267 0.0000 O 0 0 0 0 0 0 0 0 0 0 0 0 10.3324 -2.7484 0.0000 O 0 0 0 0 0 0 0 0 0 0 0 0 4.9286 -1.6119 0.0000 N 0 0 0 0 0 0 0 0 0 0 0 0 6.4371 0.…	Imidazoleacetic acid riboside	C10 H14 N2 O6	258.085	389469	12
FALSE		C25 H42 O6	Full match	No results		438.298	13.064	1.18799e+09	0	No MS2	98945.7	23192.4	114170	8.04371e+08	7.85348e+08	1.16618e+09	5.78403e+08	6.71141e+08	5.0305e+08	8.6756e+08	8.83706e+08	5.30651e+08	8.79633e+08	7.49174e+08	1.03439e+06	5.5685e+08	4.53166e+08	7.5801e+08	6.00175e+08	4.83249e+08	9.81757e+08	8.69463e+08	7.53818e+06	6.10576e+08	1.37681e+06	7.59075e+08	6.58398e+08	8.73189e+08	8.76855e+08	5.05412e+08	8.82155e+08	7.48921e+08	6.77916e+08	1.18799e+09	5.86199e+06	1.08903e+06	7.60159e+08	7.20553e+08	7.28816e+08
	Checked	Structure	Name	Formula	Molecular Weight	CSID	# References
FALSE		C4 H8 O6	Full match	No results		152.032	1.865	1.18133e+09	0	No MS2	30859	26579.5	263819	4.93374e+08	4.37306e+08	2.8726e+08	1.79713e+08	3.54029e+08	4.82953e+08	2.03052e+08	9.56028e+07	3.43618e+08	3.70343e+08	1.77968e+08	290827	3.97516e+08	3.51148e+08	2.6152e+08	1.89245e+08	1.25441e+08	4.35122e+08	1.07189e+08	2.14276e+08	4.34451e+08	301040	3.63464e+08	4.05001e+08	3.02982e+08	2.49736e+08	1.18133e+09	3.25098e+08	2.89927e+08	2.4472e+08	5.65018e+08	7.64496e+08	303250	3.53563e+08	3.6264e+08	1.38124e+08
	Checked	Structure	Name	Formula	Molecular Weight	CSID	# References
FALSE			No results	No results		118.061	6.633	1.18082e+09	0	No MS2	276555	21388.1	212022	3.01275e+08	3.10998e+08	7.02817e+06	4.84545e+06	1.98644e+07	7.43888e+06	9.24257e+07	1.37822e+08	6.59022e+07	8.1764e+06	9.24536e+07	255397	2.44676e+08	2.27998e+08	4.2439e+06	4.7367e+07	5.6161e+07	7.61096e+07	1.16374e+08	1.0067e+09	6.43814e+07	284075	3.10203e+08	2.86637e+08	6.96357e+06	1.48147e+08	2.73819e+07	6.52042e+07	6.04508e+06	4.61598e+06	6.52778e+06	7.59322e+08	268998	2.78536e+08	2.78229e+08	7.78638e+07
	Checked	Structure	Name	Formula	Molecular Weight	CSID	# References
FALSE	12-Hydroxylauric acid	C12 H24 O3	Full match	Full match		216.172	12.649	1.1619e+09	4	No MS2	201174	26111.9	420996	1.87203e+08	2.1109e+08	877912	669206	563870	862538	3.05696e+06	1.1619e+09	1.04173e+06	973169	7.21383e+08	380818	1.16138e+08	1.07185e+08	775489	1.86742e+08	5.05267e+07	3.18355e+06	1.00653e+09	658460	1.32792e+06	509237	1.89988e+08	1.7144e+08	736973	1.09125e+09	463751	1.21382e+06	445841	494685	600010	653047	432149	1.59573e+08	1.51908e+08	8.98459e+08
	Checked	Structure	Name	Formula	Molecular Weight	CSID	# References
	FALSE	# ACD/Labs06251410132D 15 14 0 0 0 0 0 0 0 0 1 V2000 0.0000 -8.0609 0.0000 O 0 0 0 0 0 0 0 0 0 0 0 0 1.3302 -8.0609 0.0000 C 0 0 0 0 0 0 0 0 0 0 0 0 1.9953 -6.9036 0.0000 C 0 0 0 0 0 0 0 0 0 0 0 0 3.3254 -6.9036 0.0000 C 0 0 0 0 0 0 0 0 0 0 0 0 3.9905 -5.7597 0.0000 C 0 0 0 0 0 0 0 0 0 0 0 0 5.3207 -5.7597 0.0000 C 0 0 0 0 0 0 0 0 0 0 0 0 5.9858 -4.6024 0.0000 C 0 0 0 0 0 0 0 0 0 0 0 0 7.3160 -4.…	12-Hydroxylauric acid	C12 H24 O3	216.173	71366	189
	FALSE	# ACD/Labs04111411492D 15 14 0 0 0 0 0 0 0 0 1 V2000 12.6851 -1.3280 0.0000 C 0 0 0 0 0 0 0 0 0 0 0 0 11.5231 -1.9920 0.0000 C 0 0 0 0 0 0 0 0 0 0 0 0 12.6851 0.0000 0.0000 O 0 0 0 0 0 0 0 0 0 0 0 0 9.2268 -1.9920 0.0000 C 0 0 0 0 0 0 0 0 0 0 0 0 8.0648 -1.3280 0.0000 C 0 0 0 0 0 0 0 0 0 0 0 0 6.9166 -1.9920 0.0000 C 0 0 0 0 0 0 0 0 0 0 0 0 5.7685 -1.3280 0.0000 C 0 0 0 0 0 0 0 0 0 0 0 0 4.6065 -…	MFCD00133279	C12 H24 O3	216.173	85026	123
	FALSE	# ACD/Labs04111411492D 15 14 0 0 1 0 0 0 0 0 1 V2000 12.6851 -1.3280 0.0000 C 0 0 0 0 0 0 0 0 0 0 0 0 11.5231 -1.9920 0.0000 C 0 0 0 0 0 0 0 0 0 0 0 0 12.6851 0.0000 0.0000 O 0 0 0 0 0 0 0 0 0 0 0 0 9.2268 -1.9920 0.0000 C 0 0 0 0 0 0 0 0 0 0 0 0 8.0648 -1.3280 0.0000 C 0 0 0 0 0 0 0 0 0 0 0 0 6.9166 -1.9920 0.0000 C 0 0 0 0 0 0 0 0 0 0 0 0 5.7685 -1.3280 0.0000 C 0 0 0 0 0 0 0 0 0 0 0 0 4.6065 -…	(3R)-3-Hydroxydodecanoic acid	C12 H24 O3	216.173	4472229	38
	FALSE	#24520 -OEChem-02070708212D 39 38 0 1 0 0 0 0 0999 V2000 8.0622 -0.5950 0.0000 O 0 0 0 0 0 0 0 0 0 0 0 0 12.3923 0.9050 0.0000 O 0 0 0 0 0 0 0 0 0 0 0 0 11.5263 -0.5950 0.0000 O 0 0 0 0 0 0 0 0 0 0 0 0 7.1962 0.9050 0.0000 C 0 0 0 0 0 0 0 0 0 0 0 0 6.3301 0.4050 0.0000 C 0 0 0 0 0 0 0 0 0 0 0 0 8.0622 0.4050 0.0000 C 0 0 3 0 0 0 0 0 0 0 0 0 5.4641 0.9050 0.0000 C 0 0 0 0 0 0 0 0 0 0 0 0 8.9282 0.…	5-Hydroxydodecanoic acid	C12 H24 O3	216.173	22928	12
FALSE		C23 H42 N4 O8	Full match	No results		502.298	10.038	1.15931e+09	0	No MS2	627549	37811.1	2.32092e+06	719320	710712	657203	8.01222e+08	507666	9.51387e+07	9.48055e+08	1.4141e+06	466998	569679	741300	314241	526115	499370	1.57817e+08	641983	525913	613168	1.33029e+06	621674	555025	386405	667823	632347	606374	1.05732e+06	3.36698e+07	508870	1.01172e+08	8.40935e+08	700646	2.96333e+06	336012	628839	600094	1.29323e+06
	Checked	Structure	Name	Formula	Molecular Weight	CSID	# References
FALSE			No results	No results		156.116	11.914	1.14746e+09	0	No MS2	2.03013e+06	113337	1.80218e+06	8.70088e+06	8.16286e+06	8.91893e+06	2.20555e+07	1.07342e+07	1.15239e+07	1.24434e+07	4.3167e+07	6.4208e+06	1.40117e+07	3.33002e+07	1.50323e+07	1.30233e+07	8.46715e+06	1.11431e+07	8.73186e+06	1.1517e+07	8.86378e+06	4.1102e+07	2.10055e+07	1.31979e+07	1.99995e+06	7.56277e+06	1.22014e+07	1.42858e+07	3.38009e+07	1.07798e+07	9.26169e+06	2.79723e+07	1.54897e+07	1.11255e+07	2.03097e+07	1.24005e+07	1.01405e+07	8.34409e+06	3.69425e+07
	Checked	Structure	Name	Formula	Molecular Weight	CSID	# References
FALSE	(-)-pinellic acid	C18 H34 O5	Full match	Full match		330.24	13.759	1.13196e+09	6	No MS2	299814	39280.8	330706	2.33008e+08	2.34849e+08	659524	479397	410707	438530	716379	9.4819e+08	715837	608112	5.97062e+08	495904	1.39865e+08	1.06367e+08	738170	1.6379e+08	7.34098e+07	810397	1.13196e+09	520453	762424	530179	2.01787e+08	1.98165e+08	531507	8.35854e+08	536643	1.13259e+06	552112	431565	667586	479304	492599	1.88698e+08	1.80468e+08	8.58623e+08
	Checked	Structure	Name	Formula	Molecular Weight	CSID	# References
	FALSE	# ACD/Labs04221415492D 23 22 0 0 1 0 0 0 0 0 1 V2000 13.2587 -2.2572 0.0000 O 0 0 0 0 0 0 0 0 0 0 0 0 15.1702 -2.2572 0.0000 O 0 0 0 0 0 0 0 0 0 0 0 0 9.5373 -2.3182 0.0000 O 0 0 0 0 0 0 0 0 0 0 0 0 1.1388 -2.1149 0.0000 O 0 0 0 0 0 0 0 0 0 0 0 0 0.0000 -0.0610 0.0000 O 0 0 0 0 0 0 0 0 0 0 0 0 13.5231 -0.6507 0.0000 C 0 0 0 0 0 0 0 0 0 0 0 0 14.8449 -0.6507 0.0000 C 0 0 0 0 0 0 0 0 0 0 0 0 12.302…	(-)-pinellic acid	C18 H34 O5	330.241	8034429	22
	FALSE	#5282966 -OEChem-02070710102D 57 56 0 1 0 0 0 0 0999 V2000 6.3301 1.2500 0.0000 O 0 0 0 0 0 0 0 0 0 0 0 0 7.1962 -1.2500 0.0000 O 0 0 0 0 0 0 0 0 0 0 0 0 9.7942 1.2500 0.0000 O 0 0 0 0 0 0 0 0 0 0 0 0 17.5885 -0.2500 0.0000 O 0 0 0 0 0 0 0 0 0 0 0 0 16.7224 1.2500 0.0000 O 0 0 0 0 0 0 0 0 0 0 0 0 11.5263 0.2500 0.0000 C 0 0 0 0 0 0 0 0 0 0 0 0 12.3923 -0.2500 0.0000 C 0 0 0 0 0 0 0 0 0 0 0 0 6.33…	(10E)-9,12,13-Trihydroxy-10-octadecenoic acid	C18 H34 O5	330.241	4446093	15
	FALSE	# ACD/Labs04221415492D 23 22 0 0 0 0 0 0 0 0 1 V2000 11.7795 -2.1760 0.0000 O 0 0 0 0 0 0 0 0 0 0 0 0 9.8127 -2.1760 0.0000 O 0 0 0 0 0 0 0 0 0 0 0 0 15.6083 -1.9877 0.0000 O 0 0 0 0 0 0 0 0 0 0 0 0 1.1717 -2.1760 0.0000 O 0 0 0 0 0 0 0 0 0 0 0 0 0.0000 -0.0837 0.0000 O 0 0 0 0 0 0 0 0 0 0 0 0 11.4866 -0.7323 0.0000 C 0 0 0 0 0 0 0 0 0 0 0 0 10.1684 -0.7323 0.0000 C 0 0 0 0 0 0 0 0 0 0 0 0 12.658…	9,10,13-Trihydroxy-11-octadecenoic acid	C18 H34 O5	330.241	4446092	11
	FALSE	# SciTegic04031415222D 23 22 0 0 0 0 0 0 0 0999 V2000 0.0000 -1.9921 0.0000 C 0 0 0 0 0 0 0 0 0 0 0 0 1.1621 -1.3281 0.0000 C 0 0 0 0 0 0 0 0 0 0 0 0 2.3034 -1.9921 0.0000 C 0 0 0 0 0 0 0 0 0 0 0 0 3.4655 -1.3281 0.0000 C 0 0 0 0 0 0 0 0 0 0 0 0 4.6068 -1.9921 0.0000 C 0 0 0 0 0 0 0 0 0 0 0 0 5.7689 -1.3281 0.0000 C 0 0 1 0 0 0 0 0 0 0 0 0 6.9102 -1.9921 0.0000 C 0 0 0 0 0 0 0 0 0 0 0 0 8.0722 -1…	(9S,10R,11E,13S)-9,10,13-Trihydroxy-11-octadecenoic acid	C18 H34 O5	330.241	30776564	6
	FALSE	#5312877 -OEChem-02070710132D 57 56 0 1 0 0 0 0 0999 V2000 13.2583 -1.2500 0.0000 O 0 0 0 0 0 0 0 0 0 0 0 0 7.1962 1.2500 0.0000 O 0 0 0 0 0 0 0 0 0 0 0 0 10.6603 1.2500 0.0000 O 0 0 0 0 0 0 0 0 0 0 0 0 17.5885 0.2500 0.0000 O 0 0 0 0 0 0 0 0 0 0 0 0 16.7224 -1.2500 0.0000 O 0 0 0 0 0 0 0 0 0 0 0 0 13.2583 -0.2500 0.0000 C 0 0 3 0 0 0 0 0 0 0 0 0 12.3923 0.2500 0.0000 C 0 0 0 0 0 0 0 0 0 0 0 0 6.…	(9E)-5,8,12-Trihydroxy-9-octadecenoic acid	C18 H34 O5	330.241	4472302	4
	FALSE	# ACD/Labs04221415492D 23 23 0 0 0 0 0 0 0 0 1 V2000 13.9352 -2.1950 0.0000 O 0 0 0 0 0 0 0 0 0 0 0 0 11.4582 -2.2151 0.0000 O 0 0 0 0 0 0 0 0 0 0 0 0 9.5452 -2.2151 0.0000 O 0 0 0 0 0 0 0 0 0 0 0 0 1.0673 -1.8929 0.0000 O 0 0 0 0 0 0 0 0 0 0 0 0 0.0000 0.0000 0.0000 O 0 0 0 0 0 0 0 0 0 0 0 0 13.3713 -0.7048 0.0000 C 0 0 0 0 0 0 0 0 0 0 0 0 14.6198 -0.7048 0.0000 C 0 0 0 0 0 0 0 0 0 0 0 0 12.2839…	9,10-Dihydroxy-11-(3-pentyl-2-oxiranyl)undecanoic acid	C18 H34 O5	330.241	10128358	3
FALSE		C17 H32 O9	Full match	No results		380.204	11.353	1.10901e+09	0	No MS2	116185	17689.4	112971	3.35316e+08	3.3983e+08	379998	286813	284805	377257	419042	9.93094e+08	384675	407759	5.65891e+08	267621	2.67095e+08	2.08262e+08	331915	1.22966e+08	3.19941e+08	558436	1.10901e+09	338225	491284	294359	3.24318e+08	3.38404e+08	438790	1.04098e+09	350918	504038	311957	309804	377724	332092	291223	3.1617e+08	3.28591e+08	8.75815e+08
	Checked	Structure	Name	Formula	Molecular Weight	CSID	# References
FALSE	Prostan-1-oicacid, 9,11,15-trihydroxy-, (9a,11a,15S)-	C20 H38 O5	Full match	Full match		358.271	14.076	1.09778e+09	1	No MS2	159695	15532.1	144223	5.26579e+08	5.88979e+08	762748	1.04183e+06	410040	247707	2.92995e+06	1.09778e+09	1.32704e+06	1.78883e+06	7.73763e+08	522822	3.26408e+08	2.46853e+08	757778	4.15158e+08	2.10841e+08	1.67735e+06	1.06129e+09	235281	607756	559343	5.1422e+08	4.6564e+08	647955	1.0928e+09	227882	898149	333376	545036	851710	321734	779982	4.96363e+08	4.31291e+08	9.38848e+08
	Checked	Structure	Name	Formula	Molecular Weight	CSID	# References
	FALSE	#5311239 -OEChem-02070710132D 63 63 0 1 0 0 0 0 0999 V2000 11.9356 -1.8216 0.0000 O 0 0 0 0 0 0 0 0 0 0 0 0 9.0877 -3.8907 0.0000 O 0 0 0 0 0 0 0 0 0 0 0 0 10.1755 1.4571 0.0000 O 0 0 0 0 0 0 0 0 0 0 0 0 2.5897 -3.5711 0.0000 O 0 0 0 0 0 0 0 0 0 0 0 0 3.1249 -1.9238 0.0000 O 0 0 0 0 0 0 0 0 0 0 0 0 10.1755 -1.5429 0.0000 C 0 0 2 0 0 0 0 0 0 0 0 0 9.3665 -2.1307 0.0000 C 0 0 2 0 0 0 0 0 0 0 0 0 10…	Prostan-1-oicacid, 9,11,15-trihydroxy-, (9a,11a,15S)-	C20 H38 O5	358.272	4470758	31
FALSE	7-ketodeoxycholic acid	C24 H38 O5	Full match	Full match		406.271	11.648	1.09743e+09	11	No MS2	589285	51813.8	628083	5.27098e+08	5.11021e+08	5.87935e+08	1.29174e+07	4.01825e+08	3.23075e+08	2.86577e+07	4.94219e+08	5.67664e+08	4.07241e+08	3.17707e+08	747302	3.72686e+08	3.36392e+08	1.26246e+08	5.91673e+08	4.16905e+08	9.7806e+08	5.6041e+08	888164	8.58591e+08	840475	4.80282e+08	4.71464e+08	5.95877e+08	5.15489e+08	3.49377e+06	7.49103e+08	1.536e+08	8.26174e+06	6.91243e+08	854916	781996	4.18535e+08	4.74504e+08	4.44244e+08
	Checked	Structure	Name	Formula	Molecular Weight	CSID	# References
	FALSE	# ACD/Labs04281711402D 34 37 0 0 1 0 0 0 0 0 1 V2000 2.2993 -5.0322 0.0000 C 0 0 0 0 0 0 0 0 0 0 0 0 1.1562 -5.6892 0.0000 C 0 0 0 0 0 0 0 0 0 0 0 0 2.2993 -7.6863 0.0000 C 0 0 0 0 0 0 0 0 0 0 0 0 4.6118 -7.6863 0.0000 C 0 0 0 0 0 0 0 0 0 0 0 0 3.4556 -5.6892 0.0000 C 0 0 0 0 0 0 0 0 0 0 0 0 4.6118 -3.6921 0.0000 C 0 0 0 0 0 0 0 0 0 0 0 0 8.1856 -5.4396 0.0000 C 0 0 0 0 0 0 0 0 0 0 0 0 8.9608 -4.…	7-ketodeoxycholic acid	C24 H38 O5	406.272	163659	65
	FALSE	# ACD/Labs06251410132D 37 40 0 0 1 0 0 0 0 0 1 V2000 6.8939 0.0000 0.0000 O 0 0 0 0 0 0 0 0 0 0 0 0 5.9320 -0.8718 0.0000 C 0 0 0 0 0 0 0 0 0 0 0 0 4.6995 -0.4710 0.0000 O 0 0 0 0 0 0 0 0 0 0 0 0 6.2025 -2.1343 0.0000 C 0 0 0 0 0 0 0 0 0 0 0 0 7.4350 -2.5351 0.0000 C 0 0 0 0 0 0 0 0 0 0 0 0 7.7056 -3.8077 0.0000 C 0 0 0 0 0 0 0 0 0 0 0 0 8.9781 -3.5371 0.0000 H 0 0 0 0 0 0 0 0 0 0 0 0 7.9761 -5.0…	7a,12a-dihydroxy-3-oxo-5b-cholan-24-oic acid	C24 H38 O5	406.272	4447044	40
	FALSE	# ACD/Labs04281711572D 34 37 0 0 1 0 0 0 0 0 1 V2000 2.2993 -5.0322 0.0000 C 0 0 0 0 0 0 0 0 0 0 0 0 1.1562 -5.6892 0.0000 C 0 0 0 0 0 0 0 0 0 0 0 0 2.2993 -7.6863 0.0000 C 0 0 0 0 0 0 0 0 0 0 0 0 4.6118 -7.6863 0.0000 C 0 0 0 0 0 0 0 0 0 0 0 0 3.4556 -5.6892 0.0000 C 0 0 0 0 0 0 0 0 0 0 0 0 4.6118 -3.6921 0.0000 C 0 0 0 0 0 0 0 0 0 0 0 0 8.1856 -5.4396 0.0000 C 0 0 0 0 0 0 0 0 0 0 0 0 8.9608 -4.…	MFCD00134876	C24 H38 O5	406.272	85044	33
	FALSE	# ACD/Labs04281712482D 29 30 0 0 1 0 0 0 0 0 1 V2000 0.1974 -4.5517 0.0000 O 0 0 0 0 0 0 0 0 0 0 0 0 0.5798 0.0000 0.0000 O 0 0 0 0 0 0 0 0 0 0 0 0 5.3165 -6.9818 0.0000 O 0 0 0 0 0 0 0 0 0 0 0 0 11.2005 -0.2344 0.0000 O 0 0 0 0 0 0 0 0 0 0 0 0 10.0903 -2.1710 0.0000 O 0 0 0 0 0 0 0 0 0 0 0 0 2.0477 -3.0222 0.0000 C 0 0 0 0 0 0 0 0 0 0 0 0 2.0477 -1.7393 0.0000 C 0 0 0 0 0 0 0 0 0 0 0 0 0.7031 -3…	alfaprostol	C24 H38 O5	406.272	5293021	19
	FALSE	# ACD/Labs04221415492D 29 29 0 0 0 0 0 0 0 0 1 V2000 1.1600 -1.3351 0.0000 O 0 0 0 0 0 0 0 0 0 0 0 0 3.4580 0.0000 0.0000 O 0 0 0 0 0 0 0 0 0 0 0 0 6.9160 -3.3267 0.0000 O 0 0 0 0 0 0 0 0 0 0 0 0 3.4580 -5.3402 0.0000 O 0 0 0 0 0 0 0 0 0 0 0 0 8.0541 -5.3402 0.0000 O 0 0 0 0 0 0 0 0 0 0 0 0 4.6180 -1.9916 0.0000 C 0 0 0 0 0 0 0 0 0 0 0 0 3.4580 -1.3351 0.0000 C 0 0 0 0 0 0 0 0 0 0 0 0 2.2981 -1.9…	Ardisianone	C24 H38 O5	406.272	391071	10
	FALSE	#11954273 -OEChem-02070712482D 67 68 0 1 0 0 0 0 0999 V2000 9.7459 2.6113 0.0000 O 0 0 0 0 0 0 0 0 0 0 0 0 9.3779 -0.8895 0.0000 O 0 0 0 0 0 0 0 0 0 0 0 0 4.7924 -0.5047 0.0000 O 0 0 0 0 0 0 0 0 0 0 0 0 2.7431 4.2175 0.0000 O 0 0 0 0 0 0 0 0 0 0 0 0 3.9021 5.5047 0.0000 O 0 0 0 0 0 0 0 0 0 0 0 0 8.3610 1.4899 0.0000 C 0 0 2 0 0 0 0 0 0 0 0 0 8.2565 0.4953 0.0000 C 0 0 2 0 0 0 0 0 0 0 0 0 9.3391 1…	Methyl (5Z)-7-{(1R,2S,3R,5S)-2-[(3R)-5-cyclohexyl-3-hydroxy-1-pentyn-1-yl]-3,5-dihydroxycyclopentyl}-5-heptenoate	C24 H38 O5	406.272	10128568	5
	FALSE	# SciTegic04031415222D 34 37 0 0 0 0 0 0 0 0999 V2000 1.1552 -6.6260 0.0000 C 0 0 0 0 0 0 0 0 0 0 0 0 1.1552 -7.9672 0.0000 C 0 0 0 0 0 0 0 0 0 0 0 0 2.3238 -8.6311 0.0000 C 0 0 0 0 0 0 0 0 0 0 0 0 3.4790 -7.9672 0.0000 C 0 0 2 0 0 0 0 0 0 0 0 0 3.4790 -6.6260 0.0000 C 0 0 2 0 0 0 0 0 0 0 0 0 2.3238 -5.9488 0.0000 C 0 0 0 0 0 0 0 0 0 0 0 0 4.6475 -8.6311 0.0000 C 0 0 0 0 0 0 0 0 0 0 0 0 5.8160 -7…	(5beta,7alpha,12beta,17alpha)-7,12-Dihydroxy-3-oxocholan-24-oic acid	C24 H38 O5	406.272	30776542	3
	FALSE	# ACD/Labs04221415492D 34 37 0 0 1 0 0 0 0 0 1 V2000 6.7533 -7.8851 0.0000 O 0 0 0 0 0 0 0 0 0 0 0 0 4.3654 -2.5869 0.0000 O 0 0 0 0 0 0 0 0 0 0 0 0 0.0000 -7.8478 0.0000 O 0 0 0 0 0 0 0 0 0 0 0 0 11.3301 0.0000 0.0000 O 0 0 0 0 0 0 0 0 0 0 0 0 12.4370 -1.9526 0.0000 O 0 0 0 0 0 0 0 0 0 0 0 0 5.6588 -5.8827 0.0000 C 0 0 0 0 0 0 0 0 0 0 0 0 4.5146 -5.2235 0.0000 C 0 0 0 0 0 0 0 0 0 0 0 0 6.8030 -5…	(3alpha,5beta,12alpha,17alpha,20S)-3,12-Dihydroxy-7-oxocholan-24-oic acid	C24 H38 O5	406.272	389366	3
	FALSE	# ACD/Labs08091917312D 34 37 0 0 1 0 0 0 0 0 1 V2000 0.0000 0.0000 0.0000 O 0 0 0 0 0 0 0 0 0 0 0 0 8.2017 0.0000 0.0000 C 0 0 0 0 0 0 0 0 0 0 0 0 8.2017 0.0000 0.0000 C 0 0 0 0 0 0 0 0 0 0 0 0 8.2017 0.0000 0.0000 C 0 0 0 0 0 0 0 0 0 0 0 0 8.2017 0.0000 0.0000 C 0 0 0 0 0 0 0 0 0 0 0 0 8.2017 0.0000 0.0000 C 0 0 0 0 0 0 0 0 0 0 0 0 8.2017 0.0000 0.0000 C 0 0 0 0 0 0 0 0 0 0 0 0 8.2017 0.0000 0.0…	(8xi,9xi,17xi)-7,12-Dihydroxy-3-oxocholan-24-oic acid	C24 H38 O5	406.272	74854252	2
	FALSE	# ACD/Labs04221415492D 30 33 0 0 1 0 0 0 0 0 1 V2000 5.6234 -2.0731 0.0000 O 0 0 0 0 0 0 0 0 0 0 0 0 6.7654 -7.6964 0.0000 O 0 0 0 0 0 0 0 0 0 0 0 0 0.0000 -7.6840 0.0000 O 0 0 0 0 0 0 0 0 0 0 0 0 11.2964 0.0000 0.0000 O 0 0 0 0 0 0 0 0 0 0 0 0 12.4136 -1.8124 0.0000 O 0 0 0 0 0 0 0 0 0 0 0 0 3.3765 -5.7475 0.0000 C 0 0 0 0 0 0 0 0 0 0 0 0 6.7902 -3.7489 0.0000 C 0 0 0 0 0 0 0 0 0 0 0 0 4.5061 -5…	(3alpha,5beta,7alpha,8xi,9xi,10xi,13xi,14xi,17xi,20xi)-3,7-Dihydroxy-12-oxocholan-24-oic acid	C24 H38 O5	406.272	388573	2
	FALSE	# ACD/Labs08121512292D 29 32 0 0 0 0 0 0 0 0 1 V2000 15.1994 -1.9607 0.0000 C 0 0 0 0 0 0 0 0 0 0 0 0 0.0000 -1.7783 0.0000 C 0 0 0 0 0 0 0 0 0 0 0 0 10.1532 -0.8208 0.0000 C 0 0 0 0 0 0 0 0 0 0 0 0 8.4813 -4.8030 0.0000 C 0 0 0 0 0 0 0 0 0 0 0 0 11.0652 -4.2862 0.0000 C 0 0 0 0 0 0 0 0 0 0 0 0 5.9582 -5.4870 0.0000 C 0 0 0 0 0 0 0 0 0 0 0 0 7.2957 -5.1678 0.0000 C 0 0 0 0 0 0 0 0 0 0 0 0 8.4661 …	16-Hydroxykaurane-17,19-diyl diacetate	C24 H38 O5	406.272	35013601	1
FALSE		C30 H58 N2 O3	Full match	No results		494.444	13.207	1.09314e+09	0	No MS2	261338	40674	251858	5.8344e+07	6.01882e+07	768702	560686	565489	460794	756288	1.09314e+09	530454	718684	3.59546e+08	570200	4.02889e+07	2.55271e+07	681927	2.83187e+07	1.24323e+07	803830	4.89739e+08	614533	660780	650203	4.9798e+07	5.36861e+07	670590	5.85681e+08	683123	668956	528875	652550	884771	615573	558048	4.33757e+07	4.29114e+07	5.13846e+08
	Checked	Structure	Name	Formula	Molecular Weight	CSID	# References
FALSE		C26 H36 N4 O3	Full match	No results		452.277	11.643	1.09056e+09	0	No MS2	110326	20287.1	105697	7.28622e+08	7.13027e+08	8.43724e+08	2.0069e+07	5.29251e+08	4.58782e+08	5.30069e+07	7.43809e+08	6.9854e+08	6.69138e+08	4.74328e+08	315584	4.96465e+08	4.68016e+08	2.10234e+08	9.29405e+08	6.19443e+08	1.08849e+09	8.3739e+08	546523	9.7806e+08	342291	6.35907e+08	6.50816e+08	8.9679e+08	7.51624e+08	5.91558e+06	9.54812e+08	1.27358e+08	1.11255e+07	9.85929e+08	353228	351585	6.03384e+08	6.58694e+08	6.35574e+08
	Checked	Structure	Name	Formula	Molecular Weight	CSID	# References
FALSE	2210856	C18 H32 O2	Full match	Full match		280.24	15.483	1.08635e+09	15	No MS2	195963	33963.6	182394	6.72873e+06	7.27226e+06	416674	1.1462e+07	272106	156643	2.83397e+07	3.25082e+07	222431	490745	3.85165e+07	335802	8.26219e+06	5.70795e+06	400113	3.05638e+06	1.57101e+06	515974	2.59634e+07	342013	356325	335042	8.8368e+06	6.81842e+06	341722	1.34794e+07	373118	380289	194787	1.99342e+07	497117	311193	317737	8.60623e+06	9.72517e+06	4.02532e+07
	Checked	Structure	Name	Formula	Molecular Weight	CSID	# References
	FALSE	# ACD/Labs04281713062D 20 19 0 0 0 0 0 0 0 0 1 V2000 11.5351 -1.9917 0.0000 C 0 0 0 0 0 0 0 0 0 0 0 0 10.3733 -1.3278 0.0000 C 0 0 0 0 0 0 0 0 0 0 0 0 12.6761 -1.3278 0.0000 C 0 0 0 0 0 0 0 0 0 0 0 0 13.8379 -1.9917 0.0000 C 0 0 0 0 0 0 0 0 0 0 0 0 14.9790 -1.3278 0.0000 C 0 0 0 0 0 0 0 0 0 0 0 0 16.1408 -1.9917 0.0000 C 0 0 0 0 0 0 0 0 0 0 0 0 17.2819 -1.3278 0.0000 C 0 0 0 0 0 0 0 0 0 0 0 0 18.…	2210856	C18 H32 O2	280.24	4445609	8514
	FALSE	# ACD/Labs04281710322D 20 19 0 0 0 0 0 0 0 0 1 V2000 11.5225 0.0000 0.0000 O 0 0 0 0 0 0 0 0 0 0 0 0 12.6760 -1.9901 0.0000 O 0 0 0 0 0 0 0 0 0 0 0 0 9.2154 -5.3239 0.0000 C 0 0 0 0 0 0 0 0 0 0 0 0 8.0619 -5.9831 0.0000 C 0 0 0 0 0 0 0 0 0 0 0 0 9.2154 -3.9929 0.0000 C 0 0 0 0 0 0 0 0 0 0 0 0 8.0619 -7.3140 0.0000 C 0 0 0 0 0 0 0 0 0 0 0 0 10.3689 -3.3211 0.0000 C 0 0 0 0 0 0 0 0 0 0 0 0 6.9084 -…	Linoleic acid	C18 H32 O2	280.24	4444105	436
	FALSE	#5312457 -OEChem-02070710132D 52 51 0 0 0 0 0 0 0999 V2000 2.5369 0.4400 0.0000 O 0 0 0 0 0 0 0 0 0 0 0 0 3.4030 -1.0600 0.0000 O 0 0 0 0 0 0 0 0 0 0 0 0 12.9292 0.4400 0.0000 C 0 0 0 0 0 0 0 0 0 0 0 0 12.0632 -0.0600 0.0000 C 0 0 0 0 0 0 0 0 0 0 0 0 13.7953 -0.0600 0.0000 C 0 0 0 0 0 0 0 0 0 0 0 0 11.1972 0.4400 0.0000 C 0 0 0 0 0 0 0 0 0 0 0 0 14.6613 0.4400 0.0000 C 0 0 0 0 0 0 0 0 0 0 0 0 10.…	Octadecadienoic acid	C18 H32 O2	280.24	4471882	147
	FALSE	#5282796 -OEChem-02070710102D 52 51 0 0 0 0 0 0 0999 V2000 2.5369 -0.4400 0.0000 O 0 0 0 0 0 0 0 0 0 0 0 0 3.4030 1.0600 0.0000 O 0 0 0 0 0 0 0 0 0 0 0 0 6.8671 0.0600 0.0000 C 0 0 0 0 0 0 0 0 0 0 0 0 7.7331 -0.4400 0.0000 C 0 0 0 0 0 0 0 0 0 0 0 0 6.0010 -0.4400 0.0000 C 0 0 0 0 0 0 0 0 0 0 0 0 8.5991 0.0600 0.0000 C 0 0 0 0 0 0 0 0 0 0 0 0 5.1350 0.0600 0.0000 C 0 0 0 0 0 0 0 0 0 0 0 0 15.5273 …	9E,11E-CLA	C18 H32 O2	280.24	4445923	112
	FALSE	# ACD/Labs04221415492D 20 19 0 0 0 0 0 0 0 0 1 V2000 1.1570 0.0000 0.0000 O 0 0 0 0 0 0 0 0 0 0 0 0 0.0000 -2.0041 0.0000 O 0 0 0 0 0 0 0 0 0 0 0 0 1.1570 -1.3430 0.0000 C 0 0 0 0 0 0 0 0 0 0 0 0 2.2934 -2.0041 0.0000 C 0 0 0 0 0 0 0 0 0 0 0 0 3.4504 -1.3430 0.0000 C 0 0 0 0 0 0 0 0 0 0 0 0 4.5867 -2.0041 0.0000 C 0 0 0 0 0 0 0 0 0 0 0 0 5.7438 -1.3430 0.0000 C 0 0 0 0 0 0 0 0 0 0 0 0 6.8801 -2.0…	Stearolic acid	C18 H32 O2	280.24	61475	99
	FALSE	# ACD/Labs04281711512D 20 19 0 0 0 0 0 0 0 0 1 V2000 8.0595 0.0000 0.0000 O 0 0 0 0 0 0 0 0 0 0 0 0 9.2079 -1.9968 0.0000 O 0 0 0 0 0 0 0 0 0 0 0 0 8.0595 -1.3243 0.0000 C 0 0 0 0 0 0 0 0 0 0 0 0 6.9111 -1.9968 0.0000 C 0 0 0 0 0 0 0 0 0 0 0 0 5.7627 -1.3243 0.0000 C 0 0 0 0 0 0 0 0 0 0 0 0 4.6040 -1.9968 0.0000 C 0 0 0 0 0 0 0 0 0 0 0 0 3.4556 -1.3243 0.0000 C 0 0 0 0 0 0 0 0 0 0 0 0 2.3072 -1.9…	Rumenic acid	C18 H32 O2	280.24	4444245	72
	FALSE	# ACD/Labs04281711332D 20 20 0 0 0 0 0 0 0 0 1 V2000 1.1376 0.0000 0.0000 O 0 0 0 0 0 0 0 0 0 0 0 0 0.0000 -1.9614 0.0000 O 0 0 0 0 0 0 0 0 0 0 0 0 9.0811 -1.9614 0.0000 C 0 0 0 0 0 0 0 0 0 0 0 0 10.5326 -1.9025 0.0000 C 0 0 0 0 0 0 0 0 0 0 0 0 9.8461 -3.1774 0.0000 C 0 0 0 0 0 0 0 0 0 0 0 0 7.9436 -1.3141 0.0000 C 0 0 0 0 0 0 0 0 0 0 0 0 11.6898 -1.3141 0.0000 C 0 0 0 0 0 0 0 0 0 0 0 0 6.8060 -1…	Malvalic acid	C18 H32 O2	280.24	9987	62
	FALSE	# ACD/Labs04281711452D 20 20 0 0 1 0 0 0 0 0 1 V2000 1.1162 0.0000 0.0000 O 0 0 0 0 0 0 0 0 0 0 0 0 0.0000 -2.0311 0.0000 O 0 0 0 0 0 0 0 0 0 0 0 0 16.1208 -1.7749 0.0000 C 0 0 0 0 0 0 0 0 0 0 0 0 16.5233 -3.0375 0.0000 C 0 0 0 0 0 0 0 0 0 0 0 0 17.2004 -0.9881 0.0000 C 0 0 0 0 0 0 0 0 0 0 0 0 14.9497 -1.0979 0.0000 C 0 0 0 0 0 0 0 0 0 0 0 0 17.8408 -2.9826 0.0000 C 0 0 0 0 0 0 0 0 0 0 0 0 18.298…	Chaulmoogric Acid	C18 H32 O2	280.24	390179	36
	FALSE	#61435 -OEChem-02070708212D 52 51 0 1 0 0 0 0 0999 V2000 7.1962 0.1340 0.0000 O 0 0 0 0 0 0 0 0 0 0 0 0 8.0622 -1.3660 0.0000 O 0 0 0 0 0 0 0 0 0 0 0 0 6.3301 -0.3660 0.0000 C 0 0 3 0 0 0 0 0 0 0 0 0 5.4641 -0.8660 0.0000 C 0 0 0 0 0 0 0 0 0 0 0 0 10.6603 0.1340 0.0000 C 0 0 0 0 0 0 0 0 0 0 0 0 11.5263 -0.3660 0.0000 C 0 0 0 0 0 0 0 0 0 0 0 0 9.7942 -0.3660 0.0000 C 0 0 0 0 0 0 0 0 0 0 0 0 12.392…	Linalyl caprylate	C18 H32 O2	280.24	55359	28
	FALSE	# ACD/Labs04281713262D 52 51 0 0 0 0 0 0 0 0 1 V2000 0.9336 -2.6287 0.0000 O 0 0 0 0 0 0 0 0 0 0 0 0 2.4567 0.0000 0.0000 O 0 0 0 0 0 0 0 0 0 0 0 0 8.5002 -1.7443 0.0000 C 0 0 0 0 0 0 0 0 0 0 0 0 10.0234 -2.6287 0.0000 C 0 0 0 0 0 0 0 0 0 0 0 0 6.9771 -2.6287 0.0000 C 0 0 0 0 0 0 0 0 0 0 0 0 11.5220 -1.7443 0.0000 C 0 0 0 0 0 0 0 0 0 0 0 0 5.4785 -1.7443 0.0000 C 0 0 0 0 0 0 0 0 0 0 0 0 20.6118 -…	10E,12Z-octadecadienoic acid	C18 H32 O2	280.24	4508489	21
	FALSE	#5312483 -OEChem-02070710132D 52 51 0 0 0 0 0 0 0999 V2000 11.5263 2.0600 0.0000 O 0 0 0 0 0 0 0 0 0 0 0 0 9.7942 2.0600 0.0000 O 0 0 0 0 0 0 0 0 0 0 0 0 3.7321 0.5600 0.0000 C 0 0 0 0 0 0 0 0 0 0 0 0 4.5981 0.0600 0.0000 C 0 0 0 0 0 0 0 0 0 0 0 0 3.7321 1.5600 0.0000 C 0 0 0 0 0 0 0 0 0 0 0 0 4.5981 -0.9400 0.0000 C 0 0 0 0 0 0 0 0 0 0 0 0 2.8660 2.0600 0.0000 C 0 0 0 0 0 0 0 0 0 0 0 0 5.4641 -1…	(6Z,9Z)-octadecadienoic acid	C18 H32 O2	280.24	4471908	16
	FALSE	#5312694 -OEChem-02070710132D 52 51 0 0 0 0 0 0 0999 V2000 2.5369 0.7500 0.0000 O 0 0 0 0 0 0 0 0 0 0 0 0 3.4030 -0.7500 0.0000 O 0 0 0 0 0 0 0 0 0 0 0 0 12.9292 -0.2500 0.0000 C 0 0 0 0 0 0 0 0 0 0 0 0 13.7953 -0.7500 0.0000 C 0 0 0 0 0 0 0 0 0 0 0 0 12.0632 -0.7500 0.0000 C 0 0 0 0 0 0 0 0 0 0 0 0 14.6613 -0.2500 0.0000 C 0 0 0 0 0 0 0 0 0 0 0 0 11.1972 -0.2500 0.0000 C 0 0 0 0 0 0 0 0 0 0 0 0 …	5-Octadecynoic acid	C18 H32 O2	280.24	4472119	11
	FALSE	#6439027 -OEChem-02070710342D 52 51 0 0 0 0 0 0 0999 V2000 17.5885 -0.4400 0.0000 O 0 0 0 0 0 0 0 0 0 0 0 0 16.7224 1.0600 0.0000 O 0 0 0 0 0 0 0 0 0 0 0 0 13.2583 0.0600 0.0000 C 0 0 0 0 0 0 0 0 0 0 0 0 12.3923 -0.4400 0.0000 C 0 0 0 0 0 0 0 0 0 0 0 0 14.1244 -0.4400 0.0000 C 0 0 0 0 0 0 0 0 0 0 0 0 11.5263 0.0600 0.0000 C 0 0 0 0 0 0 0 0 0 0 0 0 14.9904 0.0600 0.0000 C 0 0 0 0 0 0 0 0 0 0 0 0 1…	9,15-Octadecadienoic acid	C18 H32 O2	280.24	4943463	10
	FALSE	# ACD/Labs08091916262D 20 19 0 0 0 0 0 0 0 0 1 V2000 25.2196 0.0000 0.0000 C 0 0 0 0 0 0 0 0 0 0 0 0 25.2196 0.0000 0.0000 C 0 0 0 0 0 0 0 0 0 0 0 0 25.2196 0.0000 0.0000 C 0 0 0 0 0 0 0 0 0 0 0 0 25.2196 0.0000 0.0000 C 0 0 0 0 0 0 0 0 0 0 0 0 0.0000 0.0000 0.0000 C 0 0 0 0 0 0 0 0 0 0 0 0 0.0000 0.0000 0.0000 C 0 0 0 0 0 0 0 0 0 0 0 0 0.0000 0.0000 0.0000 C 0 0 0 0 0 0 0 0 0 0 0 0 0.0000 0.0000…	10,12-octadecadienoic acid	C18 H32 O2	280.24	74849607	4
	FALSE	# SciTegic04031415222D 20 19 0 0 0 0 0 0 0 0999 V2000 0.0000 -5.9838 0.0000 C 0 0 0 0 0 0 0 0 0 0 0 0 14.9838 0.0000 0.0000 C 0 0 0 0 0 0 0 0 0 0 0 0 1.1452 -6.6451 0.0000 C 0 0 0 0 0 0 0 0 0 0 0 0 13.8225 -0.6613 0.0000 C 0 0 0 0 0 0 0 0 0 0 0 0 2.3064 -5.9838 0.0000 C 0 0 0 0 0 0 0 0 0 0 0 0 3.4516 -6.6451 0.0000 C 0 0 0 0 0 0 0 0 0 0 0 0 4.6129 -5.9838 0.0000 C 0 0 0 0 0 0 0 0 0 0 0 0 5.7580 -…	Ethyl (2E,4Z)-2,4-hexadecadienoate	C18 H32 O2	280.24	30776876	4
FALSE		C19 H41 P3	Full match	No results		362.242	15.675	1.07485e+09	0	No MS2	94394	11636.7	83054.3	1.72964e+08	1.60573e+08	169184	102799	80530.9	62647.5	1.00218e+06	1.07485e+09	81995.1	119940	4.3417e+08	216781	8.70774e+07	6.31552e+07	108045	8.75942e+07	5.1391e+07	260957	7.19338e+08	123634	133814	181593	1.39943e+08	1.16604e+08	208243	8.74631e+08	125222	149421	69908.7	75442.5	168073	111757	250203	1.14613e+08	1.38986e+08	5.28236e+08
	Checked	Structure	Name	Formula	Molecular Weight	CSID	# References
FALSE		C12 H20 O8	Full match	No results		292.115	11.355	1.0649e+09	0	No MS2	139190	10337.7	181031	6.10017e+07	7.2859e+07	357038	189591	179429	223830	285553	1.0649e+09	276838	246151	2.68431e+08	172911	6.81769e+07	5.13026e+07	269703	2.00806e+07	8.071e+07	352431	7.80815e+08	201498	367106	201919	8.35418e+07	6.71407e+07	246579	8.48053e+08	255862	340014	191140	191240	312829	192499	173261	6.23817e+07	6.19419e+07	8.359e+08
	Checked	Structure	Name	Formula	Molecular Weight	CSID	# References
FALSE	DL-Phenylalanine	C9 H11 N O2	Full match	Full match		165.079	5.299	1.05341e+09	17	No MS2	1.07352e+06	28590.7	28221.2	5.69421e+07	6.59558e+07	8.39626e+07	8.8898e+07	1.13592e+07	8.50869e+07	5.25529e+07	8.99155e+07	3.69583e+07	7.17585e+07	7.8684e+07	824913	5.19318e+07	500984	7.64917e+07	6.37656e+07	6.83417e+07	5.14284e+07	4.72059e+07	2.18019e+07	2.46101e+07	1.86588e+06	2.94147e+08	2.61511e+08	2.30227e+07	4.52038e+08	3.65867e+07	5.90727e+07	8.34966e+07	8.52485e+06	1.783e+07	5.7321e+07	860886	2.72262e+08	7.82035e+07	8.72169e+07
	Checked	Structure	Name	Formula	Molecular Weight	CSID	# References
	FALSE	# ACD/Labs03221914022D 12 12 0 0 0 0 0 0 0 0 1 V2000 0.0000 -0.6634 0.0000 C 0 0 0 0 0 0 0 0 0 0 0 0 0.0000 -1.9903 0.0000 C 0 0 0 0 0 0 0 0 0 0 0 0 1.1541 -2.6607 0.0000 C 0 0 0 0 0 0 0 0 0 0 0 0 2.3013 -1.9903 0.0000 C 0 0 0 0 0 0 0 0 0 0 0 0 2.3013 -0.6634 0.0000 C 0 0 0 0 0 0 0 0 0 0 0 0 1.1541 0.0000 0.0000 C 0 0 0 0 0 0 0 0 0 0 0 0 3.4554 -2.6607 0.0000 C 0 0 0 0 0 0 0 0 0 0 0 0 4.6095 -1.9…	DL-Phenylalanine	C9 H11 N O2	165.079	969	13692
	FALSE	# ACD/Labs04281710392D 12 12 0 0 0 0 0 0 0 0 1 V2000 5.7557 -2.0072 0.0000 O 0 0 0 0 0 0 0 0 0 0 0 0 4.6110 -3.9983 0.0000 O 0 0 0 0 0 0 0 0 0 0 0 0 0.0000 -0.0081 0.0000 N 0 0 0 0 0 0 0 0 0 0 0 0 3.4582 -2.0072 0.0000 C 0 0 0 0 0 0 0 0 0 0 0 0 4.6110 -2.6683 0.0000 C 0 0 0 0 0 0 0 0 0 0 0 0 2.3055 -2.6683 0.0000 C 0 0 0 0 0 0 0 0 0 0 0 0 3.4582 -0.6691 0.0000 C 0 0 0 0 0 0 0 0 0 0 0 0 1.1527 -0.…	Benzocaine	C9 H11 N O2	165.079	13854242	1596
	FALSE	# ACD/Labs06251410112D 13 13 0 0 1 0 0 0 0 0 1 V2000 3.9920 -2.1306 0.0000 N 0 0 0 0 0 0 0 0 0 0 0 0 3.9920 -3.4593 0.0000 C 0 0 0 0 0 0 0 0 0 0 0 0 3.9920 -4.7880 0.0000 H 0 0 0 0 0 0 0 0 0 0 0 0 2.6573 -3.4593 0.0000 C 0 0 0 0 0 0 0 0 0 0 0 0 1.9930 -2.3042 0.0000 C 0 0 0 0 0 0 0 0 0 0 0 0 2.6573 -1.1551 0.0000 C 0 0 0 0 0 0 0 0 0 0 0 0 1.9930 0.0000 0.0000 C 0 0 0 0 0 0 0 0 0 0 0 0 0.6643 0.00…	L-(-)-Phenylalanine	C9 H11 N O2	165.079	5910	935
	FALSE	# ACD/Labs04281710492D 13 13 0 0 1 0 0 0 0 0 1 V2000 3.9920 -2.1306 0.0000 N 0 0 0 0 0 0 0 0 0 0 0 0 3.9920 -3.4593 0.0000 C 0 0 0 0 0 0 0 0 0 0 0 0 3.9920 -4.7880 0.0000 H 0 0 0 0 0 0 0 0 0 0 0 0 2.6573 -3.4593 0.0000 C 0 0 0 0 0 0 0 0 0 0 0 0 1.9930 -2.3042 0.0000 C 0 0 0 0 0 0 0 0 0 0 0 0 2.6573 -1.1551 0.0000 C 0 0 0 0 0 0 0 0 0 0 0 0 1.9930 0.0000 0.0000 C 0 0 0 0 0 0 0 0 0 0 0 0 0.6643 0.00…	D-(+)-Phenylalanine	C9 H11 N O2	165.079	64639	437
	FALSE	# ACD/Labs04281710332D 12 12 0 0 0 0 0 0 0 0 1 V2000 5.9827 -4.6067 0.0000 C 0 0 0 0 0 0 0 0 0 0 0 0 5.3186 -3.4580 0.0000 C 0 0 0 0 0 0 0 0 0 0 0 0 3.9905 -3.4580 0.0000 O 0 0 0 0 0 0 0 0 0 0 0 0 3.3264 -2.3033 0.0000 C 0 0 0 0 0 0 0 0 0 0 0 0 3.9905 -1.1547 0.0000 C 0 0 0 0 0 0 0 0 0 0 0 0 3.3264 0.0000 0.0000 C 0 0 0 0 0 0 0 0 0 0 0 0 1.9922 0.0000 0.0000 C 0 0 0 0 0 0 0 0 0 0 0 0 1.3282 -1.15…	Ethenzamide	C9 H11 N O2	165.079	3167	217
	FALSE	# ACD/Labs04281711072D 12 12 0 0 0 0 0 0 0 0 1 V2000 0.0000 0.0000 0.0000 C 0 0 0 0 0 0 0 0 0 0 0 0 1.1499 -0.6647 0.0000 C 0 0 0 0 0 0 0 0 0 0 0 0 1.1499 -1.9940 0.0000 O 0 0 0 0 0 0 0 0 0 0 0 0 2.2998 -2.6587 0.0000 C 0 0 0 0 0 0 0 0 0 0 0 0 3.4563 -1.9940 0.0000 O 0 0 0 0 0 0 0 0 0 0 0 0 2.2998 -3.9880 0.0000 C 0 0 0 0 0 0 0 0 0 0 0 0 3.4563 -4.6527 0.0000 C 0 0 0 0 0 0 0 0 0 0 0 0 3.4563 -5.9…	2421	C9 H11 N O2	165.079	21106112	214
	FALSE	# ACD/Labs04281710572D 12 12 0 0 0 0 0 0 0 0 1 V2000 3.4583 0.0000 0.0000 O 0 0 0 0 0 0 0 0 0 0 0 0 1.1947 0.0000 0.0000 O 0 0 0 0 0 0 0 0 0 0 0 0 0.0000 -4.6529 0.0000 N 0 0 0 0 0 0 0 0 0 0 0 0 2.3265 -1.9949 0.0000 C 0 0 0 0 0 0 0 0 0 0 0 0 2.3265 -0.6631 0.0000 C 0 0 0 0 0 0 0 0 0 0 0 0 1.1947 -2.6580 0.0000 C 0 0 0 0 0 0 0 0 0 0 0 0 1.1947 -3.9899 0.0000 C 0 0 0 0 0 0 0 0 0 0 0 0 3.5211 -2.65…	Tricaine	C9 H11 N O2	165.079	13860074	159
	FALSE	# ACD/Labs04281711072D 12 12 0 0 0 0 0 0 0 0 1 V2000 1.9967 -4.6079 0.0000 O 0 0 0 0 0 0 0 0 0 0 0 0 2.6577 -3.4582 0.0000 C 0 0 0 0 0 0 0 0 0 0 0 0 3.9888 -3.4582 0.0000 O 0 0 0 0 0 0 0 0 0 0 0 0 4.6544 -2.3039 0.0000 C 0 0 0 0 0 0 0 0 0 0 0 0 1.9967 -2.3039 0.0000 C 0 0 0 0 0 0 0 0 0 0 0 0 2.6577 -1.1543 0.0000 C 0 0 0 0 0 0 0 0 0 0 0 0 1.9967 0.0000 0.0000 C 0 0 0 0 0 0 0 0 0 0 0 0 0.6656 0.00…	Dimethyl anthranilate	C9 H11 N O2	165.079	21108245	153
	FALSE	# ACD/Labs06251410112D 13 13 0 0 1 0 0 0 0 0 1 V2000 3.8114 -2.7924 0.0000 N 0 0 0 0 0 0 0 0 0 0 0 0 2.6600 -3.4545 0.0000 C 0 0 0 0 0 0 0 0 0 0 0 0 1.5085 -4.1223 0.0000 H 0 0 0 0 0 0 0 0 0 0 0 0 1.9921 -2.3030 0.0000 C 0 0 0 0 0 0 0 0 0 0 0 0 2.6600 -1.1515 0.0000 C 0 0 0 0 0 0 0 0 0 0 0 0 1.9921 0.0000 0.0000 C 0 0 0 0 0 0 0 0 0 0 0 0 0.6621 0.0000 0.0000 C 0 0 0 0 0 0 0 0 0 0 0 0 0.0000 -1.15…	(S)-3-phenyl-β-alanine	C9 H11 N O2	165.079	598358	143
	FALSE	# ACD/Labs06251410112D 13 13 0 0 1 0 0 0 0 0 1 V2000 3.8114 -2.7924 0.0000 N 0 0 0 0 0 0 0 0 0 0 0 0 2.6600 -3.4545 0.0000 C 0 0 0 0 0 0 0 0 0 0 0 0 1.5085 -4.1223 0.0000 H 0 0 0 0 0 0 0 0 0 0 0 0 3.3221 -4.6060 0.0000 C 0 0 0 0 0 0 0 0 0 0 0 0 4.6520 -4.6060 0.0000 C 0 0 0 0 0 0 0 0 0 0 0 0 5.3199 -5.7575 0.0000 O 0 0 0 0 0 0 0 0 0 0 0 0 5.3199 -3.4545 0.0000 O 0 0 0 0 0 0 0 0 0 0 0 0 1.9921 -2.…	2087717	C9 H11 N O2	165.079	598357	140
	FALSE	MolHeader ELEMENTL06251706352D Dotmatics Elemental 12 12 0 0 0 0 999 V2000 -1.9659 5.8580 0.0000 C 0 0 0 0 0 -3.1177 5.1930 0.0000 C 0 0 0 0 0 -3.1177 3.8630 0.0000 C 0 0 0 0 0 -1.9659 3.1980 0.0000 C 0 0 0 0 0 -0.8141 3.8630 0.0000 C 0 0 0 0 0 -0.8141 5.1930 0.0000 C 0 0 0 0 0 0.3377 3.1980 0.0000 C 0 0 0 0 0 -4.2695 3.1980 0.0000 O 0 0 0 0 0 -5.4213 3.8630 0.0000 C 0 0 0 0 0 -6.5732 3.1980 0.00…	metolcarb	C9 H11 N O2	165.079	13684	130
	FALSE	# ACD/Labs04281711142D 12 12 0 0 0 0 0 0 0 0 1 V2000 3.4814 0.0000 0.0000 O 0 0 0 0 0 0 0 0 0 0 0 0 8.0775 -1.3247 0.0000 O 0 0 0 0 0 0 0 0 0 0 0 0 0.0000 -1.9871 0.0000 N 0 0 0 0 0 0 0 0 0 0 0 0 2.3021 -1.9871 0.0000 C 0 0 0 0 0 0 0 0 0 0 0 0 3.4733 -1.3247 0.0000 C 0 0 0 0 0 0 0 0 0 0 0 0 1.1470 -1.3247 0.0000 C 0 0 0 0 0 0 0 0 0 0 0 0 2.3021 -3.3199 0.0000 C 0 0 0 0 0 0 0 0 0 0 0 0 4.6284 -1.9…	4-hydroxy-1-(3-pyridyl)-1-butanone	C9 H11 N O2	165.079	96966	106
	FALSE	#409140 -OEChem-02070708252D 23 23 0 0 0 0 0 0 0999 V2000 3.7321 0.3450 0.0000 O 0 0 0 0 0 0 0 0 0 0 0 0 2.8660 1.8450 0.0000 O 0 0 0 0 0 0 0 0 0 0 0 0 4.5981 2.8450 0.0000 N 0 0 0 0 0 0 0 0 0 0 0 0 2.8660 -1.1550 0.0000 C 0 0 0 0 0 0 0 0 0 0 0 0 2.8660 -0.1550 0.0000 C 0 0 0 0 0 0 0 0 0 0 0 0 3.7321 -1.6550 0.0000 C 0 0 0 0 0 0 0 0 0 0 0 0 2.0000 -1.6550 0.0000 C 0 0 0 0 0 0 0 0 0 0 0 0 3.7321 -…	Benzyl glycinate	C9 H11 N O2	165.079	362041	92
	FALSE	# ACD/Labs04281711212D 23 24 0 0 0 0 0 0 0 0 1 V2000 0.0000 -0.9893 0.0000 O 0 0 0 0 0 0 0 0 0 0 0 0 0.0000 -4.1726 0.0000 O 0 0 0 0 0 0 0 0 0 0 0 0 7.0048 -3.4147 0.0000 N 0 0 0 0 0 0 0 0 0 0 0 0 5.5608 -0.9334 0.0000 C 0 0 0 0 0 0 0 0 0 0 0 0 4.1407 -1.7871 0.0000 C 0 0 0 0 0 0 0 0 0 0 0 0 4.1407 -3.3748 0.0000 C 0 0 0 0 0 0 0 0 0 0 0 0 7.0048 -1.7552 0.0000 C 0 0 0 0 0 0 0 0 0 0 0 0 5.5608 -4.…	Norsalsolinol	C9 H11 N O2	165.079	33891	84
	FALSE	#114 -OEChem-02070708192D 23 23 0 0 0 0 0 0 0999 V2000 2.0000 2.1900 0.0000 O 0 0 0 0 0 0 0 0 0 0 0 0 3.7321 2.1900 0.0000 O 0 0 0 0 0 0 0 0 0 0 0 0 5.4641 -2.8100 0.0000 N 0 0 0 0 0 0 0 0 0 0 0 0 3.7321 0.1900 0.0000 C 0 0 0 0 0 0 0 0 0 0 0 0 3.7321 -0.8100 0.0000 C 0 0 0 0 0 0 0 0 0 0 0 0 2.8660 0.6900 0.0000 C 0 0 0 0 0 0 0 0 0 0 0 0 4.5981 -1.3100 0.0000 C 0 0 0 0 0 0 0 0 0 0 0 0 5.4641 -0.81…	4-(3-Pyridinyl)butanoic acid	C9 H11 N O2	165.079	112	41
	FALSE	# ACD/Labs04221415492D 12 13 0 0 0 0 0 0 0 0 1 V2000 4.6606 -2.1410 0.0000 O 0 0 0 0 0 0 0 0 0 0 0 0 6.8842 -1.2942 0.0000 O 0 0 0 0 0 0 0 0 0 0 0 0 1.1565 -4.2544 0.0000 N 0 0 0 0 0 0 0 0 0 0 0 0 3.4490 -1.5971 0.0000 C 0 0 0 0 0 0 0 0 0 0 0 0 2.2993 -2.2580 0.0000 C 0 0 0 0 0 0 0 0 0 0 0 0 5.5555 -1.1565 0.0000 C 0 0 0 0 0 0 0 0 0 0 0 0 3.5866 -0.2754 0.0000 C 0 0 0 0 0 0 0 0 0 0 0 0 4.8878 0.0…	5-(3-Pyridinyl)tetrahydro-2-furanol	C9 H11 N O2	165.079	156351	19
	FALSE	#5317559 -OEChem-02070710142D 23 24 0 1 0 0 0 0 0999 V2000 2.0000 0.1377 0.0000 O 0 0 0 0 0 0 0 0 0 0 0 0 2.8660 -1.3623 0.0000 O 0 0 0 0 0 0 0 0 0 0 0 0 5.5321 0.1169 0.0000 N 0 0 0 0 0 0 0 0 0 0 0 0 3.7321 0.1377 0.0000 C 0 0 0 0 0 0 0 0 0 0 0 0 3.7321 1.1377 0.0000 C 0 0 0 0 0 0 0 0 0 0 0 0 2.8660 1.6377 0.0000 C 0 0 0 0 0 0 0 0 0 0 0 0 2.8660 -0.3623 0.0000 C 0 0 3 0 0 0 0 0 0 0 0 0 2.0000 1.…	8-Methyl-3,4-dihydro-1H-pyrano[3,4-c]pyridin-1-ol	C9 H11 N O2	165.079	4476406	10
FALSE	13-deoxytedanolide	C32 H50 O10	No match	Full match		594.341	10.783	1.04797e+09	2	No MS2	317037	29031.6	388188	553111	569716	614568	868608	515112	559730	1.00772e+06	751834	405326	569209	602722	393477	497462	481685	716095	557585	529054	570586	723229	950645	523614	433692	627076	596763	601101	1.00056e+06	1.04797e+09	518750	568862	944973	626182	3.85828e+07	410289	565339	570273	678255
	Checked	Structure	Name	Formula	Molecular Weight	CSID	# References
	FALSE	# ACD/Labs04221415492D 43 44 0 0 1 0 0 0 0 0 1 V2000 4.6014 -8.6351 0.0000 O 0 0 0 0 0 0 0 0 0 0 0 0 5.7518 -9.4269 0.0000 O 0 0 0 0 0 0 0 0 0 0 0 0 9.2028 -7.3055 0.0000 O 0 0 0 0 0 0 0 0 0 0 0 0 5.8563 -5.3185 0.0000 O 0 0 0 0 0 0 0 0 0 0 0 0 10.3382 -9.3672 0.0000 O 0 0 0 0 0 0 0 0 0 0 0 0 10.3233 -5.3036 0.0000 O 0 0 0 0 0 0 0 0 0 0 0 0 12.6091 -7.9628 0.0000 O 0 0 0 0 0 0 0 0 0 0 0 0 11.4886…	13-deoxytedanolide	C32 H50 O10	594.34	10473090	10
	FALSE	# ACD/Labs04221415492D 43 46 0 0 0 0 0 0 0 0 1 V2000 17.7896 -6.2086 0.0000 O 0 0 0 0 0 0 0 0 0 0 0 0 0.0000 -6.2441 0.0000 O 0 0 0 0 0 0 0 0 0 0 0 0 8.4678 -0.0534 0.0000 O 0 0 0 0 0 0 0 0 0 0 0 0 6.1730 -0.0534 0.0000 O 0 0 0 0 0 0 0 0 0 0 0 0 9.2862 -0.0178 0.0000 O 0 0 0 0 0 0 0 0 0 0 0 0 11.5988 0.0000 0.0000 O 0 0 0 0 0 0 0 0 0 0 0 0 6.6889 -6.3509 0.0000 N 0 0 0 0 0 0 0 0 0 0 0 0 11.1185 -…	3-[2-[(E)-[3-(2-carboxyethyl)-5-[(4-ethyl-3-methyl-5-oxo-pyrrolidin-2-yl)methyl]-4-methyl-pyrrol-2-ylidene]methyl]-5-[(3-ethyl-4-methyl-5-oxo-pyrrolidin-2-yl)methyl]-4-methyl-1H-pyrrol-3-yl]propanoic acid	C33 H46 N4 O6	594.342	22857740	2
FALSE			No results	No results		89.9698	0.906	1.04623e+09	0	No MS2	28505.3	30449.7	32886.9	7.28246e+08	7.32314e+08	7.44928e+08	5.93828e+08	6.37834e+08	6.14737e+08	7.92101e+08	4.26536e+08	6.23664e+08	8.15079e+08	5.36184e+08	380075	6.29618e+08	5.71191e+08	7.62376e+08	6.01854e+08	5.09585e+08	7.71687e+08	3.84854e+08	7.40781e+08	7.62254e+08	502641	7.56566e+08	7.50555e+08	8.84147e+08	5.17802e+08	2.38071e+06	8.0009e+08	5.59754e+08	6.18758e+08	6.90976e+08	7.8383e+08	253325	7.66116e+08	7.5851e+08	4.30078e+08
	Checked	Structure	Name	Formula	Molecular Weight	CSID	# References
FALSE		C28 H56 N8 O	Full match	No results		520.459	13.345	1.04469e+09	0	No MS2	222291	29460.8	216444	6.32296e+07	6.97655e+07	474340	330303	342012	319136	574148	1.04469e+09	352456	508737	4.20652e+08	371387	4.34559e+07	3.08982e+07	456733	3.04423e+07	1.37616e+07	583813	6.09167e+08	421464	434179	454664	6.20566e+07	5.17486e+07	463119	4.86106e+08	458126	445252	349220	395546	565957	425540	389463	5.21666e+07	4.74062e+07	3.86055e+08
	Checked	Structure	Name	Formula	Molecular Weight	CSID	# References
FALSE		C20 H42 O11	Full match	No results		458.271	9.767	1.0397e+09	0	No MS2	678355	35666.1	39392.7	452844	468243	667069	6.73716e+08	324203	5.48309e+07	7.59991e+08	1.55956e+06	287036	466352	1.07908e+06	287631	364756	349343	6.85264e+07	617732	442222	460468	1.38056e+06	393730	377223	345004	404378	423428	479791	1.14571e+06	3.50837e+07	384322	7.33989e+07	6.26888e+08	486590	2.95187e+06	306671	496918	450576	1.90921e+06
	Checked	Structure	Name	Formula	Molecular Weight	CSID	# References
FALSE			No results	No results		189.144	11.803	1.03859e+09	0	No MS2	73780.8	14376	74173.6	1.9615e+08	2.09889e+08	657403	261033	301623	405354	863173	1.03859e+09	528052	552122	6.53527e+08	228726	1.30271e+08	1.24139e+08	555859	2.40636e+08	1.38113e+08	775499	8.32474e+08	267909	532004	237873	1.99779e+08	1.73816e+08	393019	8.77207e+08	285705	402192	330259	259482	342145	243450	248784	1.77527e+08	1.64129e+08	7.67969e+08
	Checked	Structure	Name	Formula	Molecular Weight	CSID	# References
FALSE		C22 H40 N2 O	Full match	No results		348.313	12.172	1.01108e+09	0	No MS2	181952	11890.3	179872	9.60597e+07	9.44148e+07	340586	238839	274281	353204	687695	1.01108e+09	278771	635124	7.07062e+08	300096	6.51741e+07	5.21321e+07	358127	4.75359e+07	1.40238e+07	727253	7.1819e+08	299165	309185	351412	8.37957e+07	8.57861e+07	304956	8.16457e+08	374383	229055	180059	229356	302088	293586	317784	7.83631e+07	8.69862e+07	8.29839e+08
	Checked	Structure	Name	Formula	Molecular Weight	CSID	# References
FALSE	RG1300000	C18 H34 O3	No results	Full match		298.25	14.514	1.00744e+09	13	No MS2	444251	51048.1	364601	2.78861e+07	3.0044e+07	2.16827e+07	8.4077e+07	1.5423e+07	1.25676e+07	2.27914e+08	1.42535e+07	2.34311e+06	2.50277e+07	1.00594e+07	1.021e+06	1.72875e+07	1.5308e+07	7.3779e+07	1.11064e+07	3.8808e+06	1.66592e+07	1.0859e+07	3.12872e+07	3.66523e+06	2.08742e+06	2.79844e+07	2.34039e+07	1.53875e+07	2.48035e+07	3.52281e+07	3.71494e+06	5.14012e+07	1.43353e+08	9.32688e+06	2.8345e+07	1.83674e+06	2.51704e+07	2.68977e+07	9.8099e+06
	Checked	Structure	Name	Formula	Molecular Weight	CSID	# References
	FALSE	# ACD/Labs04221415492D 21 21 0 0 0 0 0 0 0 0 1 V2000 11.0393 -0.1464 0.0000 O 0 0 0 0 0 0 0 0 0 0 0 0 1.1499 0.0000 0.0000 O 0 0 0 0 0 0 0 0 0 0 0 0 0.0000 -1.9653 0.0000 O 0 0 0 0 0 0 0 0 0 0 0 0 10.3702 -1.2963 0.0000 C 0 0 0 0 0 0 0 0 0 0 0 0 11.7083 -1.2963 0.0000 C 0 0 0 0 0 0 0 0 0 0 0 0 9.2203 -1.9653 0.0000 C 0 0 0 0 0 0 0 0 0 0 0 0 12.8583 -1.9653 0.0000 C 0 0 0 0 0 0 0 0 0 0 0 0 8.0704 …	RG1300000	C18 H34 O3	298.251	15081	189
	FALSE	# ACD/Labs04281713272D 21 20 0 0 1 0 0 0 0 0 1 V2000 13.9455 0.0000 0.0000 O 0 0 0 0 0 0 0 0 0 0 0 0 1.1431 -0.1455 0.0000 O 0 0 0 0 0 0 0 0 0 0 0 0 0.0000 -2.1199 0.0000 O 0 0 0 0 0 0 0 0 0 0 0 0 13.9455 -1.4548 0.0000 C 0 0 0 0 0 0 0 0 0 0 0 0 12.8024 -2.1199 0.0000 C 0 0 0 0 0 0 0 0 0 0 0 0 15.0886 -2.1199 0.0000 C 0 0 0 0 0 0 0 0 0 0 0 0 11.6386 -1.4548 0.0000 C 0 0 0 0 0 0 0 0 0 0 0 0 16.231…	Ricinoleic Acid	C18 H34 O3	298.251	558800	140
	FALSE	#361941 -OEChem-02070708242D 55 54 0 0 0 0 0 0 0999 V2000 8.9282 -1.2500 0.0000 O 0 0 0 0 0 0 0 0 0 0 0 0 17.5885 -0.2500 0.0000 O 0 0 0 0 0 0 0 0 0 0 0 0 16.7224 1.2500 0.0000 O 0 0 0 0 0 0 0 0 0 0 0 0 11.5263 0.2500 0.0000 C 0 0 0 0 0 0 0 0 0 0 0 0 12.3923 -0.2500 0.0000 C 0 0 0 0 0 0 0 0 0 0 0 0 10.6603 -0.2500 0.0000 C 0 0 0 0 0 0 0 0 0 0 0 0 6.3301 0.2500 0.0000 C 0 0 0 0 0 0 0 0 0 0 0 0 13.…	10-ketostearic acid	C18 H34 O3	298.251	321290	69
	FALSE	# ACD/Labs04221415492D 21 21 0 0 0 0 0 0 0 0 1 V2000 4.1403 -3.1396 0.0000 O 0 0 0 0 0 0 0 0 0 0 0 0 1.1381 -2.0015 0.0000 O 0 0 0 0 0 0 0 0 0 0 0 0 2.3154 0.0000 0.0000 O 0 0 0 0 0 0 0 0 0 0 0 0 3.4731 -1.9819 0.0000 C 0 0 0 0 0 0 0 0 0 0 0 0 2.8060 -3.1396 0.0000 C 0 0 0 0 0 0 0 0 0 0 0 0 2.3154 -1.3147 0.0000 C 0 0 0 0 0 0 0 0 0 0 0 0 4.6112 -1.2951 0.0000 C 0 0 0 0 0 0 0 0 0 0 0 0 5.7690 -1.9…	METHYL PALMOXIRATE	C18 H34 O3	298.251	61861	60
	FALSE	#5282942 -OEChem-02070710102D 55 54 0 1 0 0 0 0 0999 V2000 7.1962 -4.2500 0.0000 O 0 0 0 0 0 0 0 0 0 0 0 0 13.2583 4.2500 0.0000 O 0 0 0 0 0 0 0 0 0 0 0 0 14.1244 2.7500 0.0000 O 0 0 0 0 0 0 0 0 0 0 0 0 6.3301 -2.7500 0.0000 C 0 0 0 0 0 0 0 0 0 0 0 0 5.4641 -3.2500 0.0000 C 0 0 0 0 0 0 0 0 0 0 0 0 7.1962 -3.2500 0.0000 C 0 0 3 0 0 0 0 0 0 0 0 0 4.5981 -2.7500 0.0000 C 0 0 0 0 0 0 0 0 0 0 0 0 10.6…	Ricinoleic Acid	C18 H34 O3	298.251	4446069	56
	FALSE	#3083831 -OEChem-02070709142D 55 54 0 0 0 0 0 0 0999 V2000 9.7942 -0.7500 0.0000 O 0 0 0 0 0 0 0 0 0 0 0 0 17.5885 0.7500 0.0000 O 0 0 0 0 0 0 0 0 0 0 0 0 16.7224 -0.7500 0.0000 O 0 0 0 0 0 0 0 0 0 0 0 0 6.3301 0.2500 0.0000 C 0 0 0 0 0 0 0 0 0 0 0 0 7.1962 0.7500 0.0000 C 0 0 0 0 0 0 0 0 0 0 0 0 5.4641 0.7500 0.0000 C 0 0 0 0 0 0 0 0 0 0 0 0 8.0622 0.2500 0.0000 C 0 0 0 0 0 0 0 0 0 0 0 0 12.3923…	9-Oxooctadecanoic acid	C18 H34 O3	298.251	2340980	23
	FALSE	# ACD/Labs04111411492D 21 20 0 0 0 0 0 0 0 0 1 V2000 19.3967 -1.3576 0.0000 C 0 0 0 0 0 0 0 0 0 0 0 0 18.2448 -2.0363 0.0000 C 0 0 0 0 0 0 0 0 0 0 0 0 15.9822 -2.0363 0.0000 C 0 0 0 0 0 0 0 0 0 0 0 0 14.8098 -1.3576 0.0000 C 0 0 0 0 0 0 0 0 0 0 0 0 13.6373 -2.0363 0.0000 C 0 0 0 0 0 0 0 0 0 0 0 0 12.5472 -1.3576 0.0000 C 0 0 0 0 0 0 0 0 0 0 0 0 11.3747 -2.0363 0.0000 C 0 0 0 0 0 0 0 0 0 0 0 0 10.…	3-oxostearic acid	C18 H34 O3	298.251	4446132	23
	FALSE	# ACD/Labs04221415492D 21 20 0 0 0 0 0 0 0 0 1 V2000 18.3025 0.0000 0.0000 O 0 0 0 0 0 0 0 0 0 0 0 0 19.4348 -3.4999 0.0000 O 0 0 0 0 0 0 0 0 0 0 0 0 20.5877 -1.3176 0.0000 O 0 0 0 0 0 0 0 0 0 0 0 0 18.3025 -1.3176 0.0000 C 0 0 0 0 0 0 0 0 0 0 0 0 19.4348 -1.9764 0.0000 C 0 0 0 0 0 0 0 0 0 0 0 0 17.1495 -1.9764 0.0000 C 0 0 0 0 0 0 0 0 0 0 0 0 16.0172 -1.3176 0.0000 C 0 0 0 0 0 0 0 0 0 0 0 0 14.8…	2-oxostearic acid	C18 H34 O3	298.251	388461	22
	FALSE	#85548 -OEChem-02070708192D 55 54 0 0 0 0 0 0 0999 V2000 13.2583 -0.7500 0.0000 O 0 0 0 0 0 0 0 0 0 0 0 0 17.5885 0.7500 0.0000 O 0 0 0 0 0 0 0 0 0 0 0 0 16.7224 -0.7500 0.0000 O 0 0 0 0 0 0 0 0 0 0 0 0 8.0622 0.2500 0.0000 C 0 0 0 0 0 0 0 0 0 0 0 0 7.1962 0.7500 0.0000 C 0 0 0 0 0 0 0 0 0 0 0 0 8.9282 0.7500 0.0000 C 0 0 0 0 0 0 0 0 0 0 0 0 6.3301 0.2500 0.0000 C 0 0 0 0 0 0 0 0 0 0 0 0 9.7942 0…	5-Oxooctadecanoic acid	C18 H34 O3	298.251	77153	20
	FALSE	# ACD/Labs04221415492D 21 21 0 0 1 0 0 0 0 0 1 V2000 7.7104 -3.0419 0.0000 O 0 0 0 0 0 0 0 0 0 0 0 0 1.1618 0.0000 0.0000 O 0 0 0 0 0 0 0 0 0 0 0 0 0.0000 -2.0279 0.0000 O 0 0 0 0 0 0 0 0 0 0 0 0 7.0133 -2.0279 0.0000 C 0 0 0 0 0 0 0 0 0 0 0 0 8.2385 -2.0279 0.0000 C 0 0 0 0 0 0 0 0 0 0 0 0 5.8514 -1.3520 0.0000 C 0 0 0 0 0 0 0 0 0 0 0 0 9.4003 -1.3520 0.0000 C 0 0 0 0 0 0 0 0 0 0 0 0 4.6896 -2.0…	cis-6,7-epoxystearic acid	C18 H34 O3	298.251	571074	11
	FALSE	#5312905 -OEChem-02070710132D 55 54 0 0 0 0 0 0 0999 V2000 8.0622 -0.7500 0.0000 O 0 0 0 0 0 0 0 0 0 0 0 0 17.5885 0.7500 0.0000 O 0 0 0 0 0 0 0 0 0 0 0 0 16.7224 -0.7500 0.0000 O 0 0 0 0 0 0 0 0 0 0 0 0 11.5263 0.2500 0.0000 C 0 0 0 0 0 0 0 0 0 0 0 0 10.6603 0.7500 0.0000 C 0 0 0 0 0 0 0 0 0 0 0 0 12.3923 0.7500 0.0000 C 0 0 0 0 0 0 0 0 0 0 0 0 9.7942 0.2500 0.0000 C 0 0 0 0 0 0 0 0 0 0 0 0 13.2…	11-Oxooctadecanoic acid	C18 H34 O3	298.251	4472330	10
	FALSE	# ACD/Labs04221415492D 21 20 0 0 0 0 0 0 0 0 1 V2000 1.1037 0.0000 0.0000 O 0 0 0 0 0 0 0 0 0 0 0 0 0.0000 -2.0127 0.0000 O 0 0 0 0 0 0 0 0 0 0 0 0 21.6417 -1.8828 0.0000 O 0 0 0 0 0 0 0 0 0 0 0 0 1.1037 -1.2985 0.0000 C 0 0 0 0 0 0 0 0 0 0 0 0 2.2724 -2.0127 0.0000 C 0 0 0 0 0 0 0 0 0 0 0 0 3.3977 -1.2985 0.0000 C 0 0 0 0 0 0 0 0 0 0 0 0 4.5015 -2.0127 0.0000 C 0 0 0 0 0 0 0 0 0 0 0 0 5.6052 -1.…	18-hydroxyoleic acid	C18 H34 O3	298.251	4472198	8
	FALSE	# ACD/Labs09180712372D 21 21 0 0 0 0 0 0 0 0 1 V2000 16.6485 -8.1078 0.0000 C 0 0 0 0 0 0 0 0 0 0 0 0 15.3499 -7.8248 0.0000 C 0 0 0 0 0 0 0 0 0 0 0 0 14.9337 -6.5595 0.0000 C 0 0 0 0 0 0 0 0 0 0 0 0 13.6351 -6.2931 0.0000 C 0 0 0 0 0 0 0 0 0 0 0 0 13.2189 -5.0279 0.0000 C 0 0 0 0 0 0 0 0 0 0 0 0 11.9203 -4.7448 0.0000 C 0 0 0 0 0 0 0 0 0 0 0 0 11.5041 -3.4795 0.0000 C 0 0 0 0 0 0 0 0 0 0 0 0 12.…	8-(5-Hexyltetrahydro-2-furanyl)octanoic acid	C18 H34 O3	298.251	18851680	5
FALSE	(-)-pinellic acid	C18 H34 O5	Full match	Full match		330.24	11.392	1.00276e+09	6	No MS2	372068	34895.3	354394	2.55494e+08	2.6225e+08	1.48409e+08	7.31308e+07	7.10404e+07	6.67931e+07	1.3834e+08	8.27681e+07	6.89181e+07	1.19743e+08	7.18932e+07	633621	1.83991e+08	1.76446e+08	1.00053e+08	1.53694e+08	8.81338e+07	1.36552e+08	9.87465e+07	1.13141e+08	1.0468e+08	710663	2.34146e+08	2.45258e+08	1.63777e+08	1.0242e+08	3.4543e+06	1.02297e+08	9.15013e+07	7.39038e+07	1.19976e+08	1.30961e+08	568112	2.32056e+08	2.26745e+08	8.68769e+07
	Checked	Structure	Name	Formula	Molecular Weight	CSID	# References
	FALSE	# ACD/Labs04221415492D 23 22 0 0 1 0 0 0 0 0 1 V2000 13.2587 -2.2572 0.0000 O 0 0 0 0 0 0 0 0 0 0 0 0 15.1702 -2.2572 0.0000 O 0 0 0 0 0 0 0 0 0 0 0 0 9.5373 -2.3182 0.0000 O 0 0 0 0 0 0 0 0 0 0 0 0 1.1388 -2.1149 0.0000 O 0 0 0 0 0 0 0 0 0 0 0 0 0.0000 -0.0610 0.0000 O 0 0 0 0 0 0 0 0 0 0 0 0 13.5231 -0.6507 0.0000 C 0 0 0 0 0 0 0 0 0 0 0 0 14.8449 -0.6507 0.0000 C 0 0 0 0 0 0 0 0 0 0 0 0 12.302…	(-)-pinellic acid	C18 H34 O5	330.241	8034429	22
	FALSE	#5282966 -OEChem-02070710102D 57 56 0 1 0 0 0 0 0999 V2000 6.3301 1.2500 0.0000 O 0 0 0 0 0 0 0 0 0 0 0 0 7.1962 -1.2500 0.0000 O 0 0 0 0 0 0 0 0 0 0 0 0 9.7942 1.2500 0.0000 O 0 0 0 0 0 0 0 0 0 0 0 0 17.5885 -0.2500 0.0000 O 0 0 0 0 0 0 0 0 0 0 0 0 16.7224 1.2500 0.0000 O 0 0 0 0 0 0 0 0 0 0 0 0 11.5263 0.2500 0.0000 C 0 0 0 0 0 0 0 0 0 0 0 0 12.3923 -0.2500 0.0000 C 0 0 0 0 0 0 0 0 0 0 0 0 6.33…	(10E)-9,12,13-Trihydroxy-10-octadecenoic acid	C18 H34 O5	330.241	4446093	15
	FALSE	# ACD/Labs04221415492D 23 22 0 0 0 0 0 0 0 0 1 V2000 11.7795 -2.1760 0.0000 O 0 0 0 0 0 0 0 0 0 0 0 0 9.8127 -2.1760 0.0000 O 0 0 0 0 0 0 0 0 0 0 0 0 15.6083 -1.9877 0.0000 O 0 0 0 0 0 0 0 0 0 0 0 0 1.1717 -2.1760 0.0000 O 0 0 0 0 0 0 0 0 0 0 0 0 0.0000 -0.0837 0.0000 O 0 0 0 0 0 0 0 0 0 0 0 0 11.4866 -0.7323 0.0000 C 0 0 0 0 0 0 0 0 0 0 0 0 10.1684 -0.7323 0.0000 C 0 0 0 0 0 0 0 0 0 0 0 0 12.658…	9,10,13-Trihydroxy-11-octadecenoic acid	C18 H34 O5	330.241	4446092	11
	FALSE	# SciTegic04031415222D 23 22 0 0 0 0 0 0 0 0999 V2000 0.0000 -1.9921 0.0000 C 0 0 0 0 0 0 0 0 0 0 0 0 1.1621 -1.3281 0.0000 C 0 0 0 0 0 0 0 0 0 0 0 0 2.3034 -1.9921 0.0000 C 0 0 0 0 0 0 0 0 0 0 0 0 3.4655 -1.3281 0.0000 C 0 0 0 0 0 0 0 0 0 0 0 0 4.6068 -1.9921 0.0000 C 0 0 0 0 0 0 0 0 0 0 0 0 5.7689 -1.3281 0.0000 C 0 0 1 0 0 0 0 0 0 0 0 0 6.9102 -1.9921 0.0000 C 0 0 0 0 0 0 0 0 0 0 0 0 8.0722 -1…	(9S,10R,11E,13S)-9,10,13-Trihydroxy-11-octadecenoic acid	C18 H34 O5	330.241	30776564	6
	FALSE	#5312877 -OEChem-02070710132D 57 56 0 1 0 0 0 0 0999 V2000 13.2583 -1.2500 0.0000 O 0 0 0 0 0 0 0 0 0 0 0 0 7.1962 1.2500 0.0000 O 0 0 0 0 0 0 0 0 0 0 0 0 10.6603 1.2500 0.0000 O 0 0 0 0 0 0 0 0 0 0 0 0 17.5885 0.2500 0.0000 O 0 0 0 0 0 0 0 0 0 0 0 0 16.7224 -1.2500 0.0000 O 0 0 0 0 0 0 0 0 0 0 0 0 13.2583 -0.2500 0.0000 C 0 0 3 0 0 0 0 0 0 0 0 0 12.3923 0.2500 0.0000 C 0 0 0 0 0 0 0 0 0 0 0 0 6.…	(9E)-5,8,12-Trihydroxy-9-octadecenoic acid	C18 H34 O5	330.241	4472302	4
	FALSE	# ACD/Labs04221415492D 23 23 0 0 0 0 0 0 0 0 1 V2000 13.9352 -2.1950 0.0000 O 0 0 0 0 0 0 0 0 0 0 0 0 11.4582 -2.2151 0.0000 O 0 0 0 0 0 0 0 0 0 0 0 0 9.5452 -2.2151 0.0000 O 0 0 0 0 0 0 0 0 0 0 0 0 1.0673 -1.8929 0.0000 O 0 0 0 0 0 0 0 0 0 0 0 0 0.0000 0.0000 0.0000 O 0 0 0 0 0 0 0 0 0 0 0 0 13.3713 -0.7048 0.0000 C 0 0 0 0 0 0 0 0 0 0 0 0 14.6198 -0.7048 0.0000 C 0 0 0 0 0 0 0 0 0 0 0 0 12.2839…	9,10-Dihydroxy-11-(3-pentyl-2-oxiranyl)undecanoic acid	C18 H34 O5	330.241	10128358	3
FALSE	Bufa-20,22-dienolide	C24 H34 O2	Full match	Full match		354.255	12.014	1.00025e+09	2	No MS2	237761	15184	233953	5.19772e+08	6.97412e+08	7.04389e+08	2.3665e+07	4.65384e+08	8.04467e+07	4.13788e+07	9.96785e+08	4.84817e+08	4.94894e+08	8.06594e+08	219526	4.99865e+08	4.42409e+08	2.01217e+07	8.60173e+08	6.84197e+08	8.29223e+08	8.46657e+08	391654	6.98979e+08	292638	6.14398e+08	5.98825e+08	7.71208e+08	8.74823e+08	1.05785e+06	5.4815e+08	3.12878e+07	5.84763e+06	7.79372e+08	253096	314748	6.15809e+08	5.76215e+08	9.07439e+08
	Checked	Structure	Name	Formula	Molecular Weight	CSID	# References
	FALSE	# ACD/Labs04221415492D 29 33 0 0 1 0 0 0 0 0 1 V2000 5.6292 -1.9512 0.0000 O 0 0 0 0 0 0 0 0 0 0 0 0 6.7609 0.0000 0.0000 O 0 0 0 0 0 0 0 0 0 0 0 0 4.5073 -7.8048 0.0000 C 0 0 0 0 0 0 0 0 0 0 0 0 5.6292 -7.1511 0.0000 C 0 0 0 0 0 0 0 0 0 0 0 0 3.3756 -7.1511 0.0000 C 0 0 0 0 0 0 0 0 0 0 0 0 5.6292 -5.8536 0.0000 C 0 0 0 0 0 0 0 0 0 0 0 0 2.2536 -7.8048 0.0000 C 0 0 0 0 0 0 0 0 0 0 0 0 6.7609 -5.1…	Bufa-20,22-dienolide	C24 H34 O2	354.256	30791731	68
	FALSE	#11051218 -OEChem-02070712222D 60 61 0 0 0 0 0 0 0999 V2000 8.9282 4.7500 0.0000 O 0 0 0 0 0 0 0 0 0 0 0 0 2.8660 -4.7500 0.0000 O 0 0 0 0 0 0 0 0 0 0 0 0 6.3301 0.2500 0.0000 C 0 0 0 0 0 0 0 0 0 0 0 0 5.4641 -0.2500 0.0000 C 0 0 0 0 0 0 0 0 0 0 0 0 6.3301 1.2500 0.0000 C 0 0 0 0 0 0 0 0 0 0 0 0 5.4641 -1.2500 0.0000 C 0 0 0 0 0 0 0 0 0 0 0 0 7.1962 1.7500 0.0000 C 0 0 0 0 0 0 0 0 0 0 0 0 4.5981 …	1,1'-[1,12-Dodecanediylbis(oxy)]dibenzene	C24 H34 O2	354.256	9226381	9
FALSE	(2E)-2,5-Dichloro-4-oxo-2-hexenedioic acid	C6 H4 Cl2 O5	No match	Full match		225.944	0.897	9.99336e+08	1	No MS2	26184.9	27971	30209.8	5.68456e+08	5.76416e+08	5.82222e+08	4.46759e+08	4.71862e+08	4.32374e+08	6.97595e+08	2.1997e+08	5.14742e+08	5.69287e+08	3.15379e+08	185621	4.27687e+08	4.07886e+08	5.74625e+08	4.5425e+08	3.26099e+08	5.99454e+08	2.04109e+08	5.8099e+08	6.06204e+08	187370	5.52549e+08	5.23935e+08	5.88953e+08	2.69568e+08	2.18691e+06	5.91513e+08	4.4937e+08	3.98285e+08	5.43674e+08	4.21644e+08	202425	5.3319e+08	5.91019e+08	2.55467e+08
	Checked	Structure	Name	Formula	Molecular Weight	CSID	# References
	FALSE	# ACD/Labs04221415492D 13 12 0 0 0 0 0 0 0 0 1 V2000 5.7513 -2.6572 0.0000 Cl 0 0 0 0 0 0 0 0 0 0 0 0 2.2981 -5.9847 0.0000 Cl 0 0 0 0 0 0 0 0 0 0 0 0 2.2921 -1.9929 0.0000 O 0 0 0 0 0 0 0 0 0 0 0 0 3.4472 0.0000 0.0000 O 0 0 0 0 0 0 0 0 0 0 0 0 5.7513 0.0000 0.0000 O 0 0 0 0 0 0 0 0 0 0 0 0 1.1491 -2.6572 0.0000 O 0 0 0 0 0 0 0 0 0 0 0 0 0.0000 -4.6561 0.0000 O 0 0 0 0 0 0 0 0 0 0 0 0 3.4472 -2.…	(2E)-2,5-Dichloro-4-oxo-2-hexenedioic acid	C6 H4 Cl2 O5	225.944	4445367	6
FALSE	Tiformin	C5 H12 N4 O	Full match	Full match		144.101	1.123	9.70759e+08	1	No MS2	11681.7	12633.5	14365.4	9.95136e+07	8.74756e+07	4.88539e+06	3.8756e+06	4.04371e+06	3.87287e+06	4.14695e+06	3.73457e+07	3.3495e+06	4.37672e+06	1.66759e+07	89116.1	7.82393e+07	6.70372e+07	4.87739e+06	2.80255e+07	3.85435e+06	5.22943e+06	9.24465e+07	4.08008e+06	4.72247e+06	103951	8.00379e+07	8.18498e+07	5.58537e+06	7.13842e+06	815444	5.3648e+06	3.86832e+06	3.39084e+06	4.5663e+06	4.11185e+06	90793.2	7.6268e+07	8.51583e+07	9.70759e+08
	Checked	Structure	Name	Formula	Molecular Weight	CSID	# References
	FALSE	# ACD/Labs04281710392D 10 9 0 0 0 0 0 0 0 0 1 V2000 1.1273 -3.3254 0.0000 O 0 0 0 0 0 0 0 0 0 0 0 0 5.7249 -1.9969 0.0000 N 0 0 0 0 0 0 0 0 0 0 0 0 6.9246 0.0000 0.0000 N 0 0 0 0 0 0 0 0 0 0 0 0 8.0519 -1.9969 0.0000 N 0 0 0 0 0 0 0 0 0 0 0 0 0.0000 -1.3286 0.0000 N 0 0 0 0 0 0 0 0 0 0 0 0 6.9246 -1.3286 0.0000 C 0 0 0 0 0 0 0 0 0 0 0 0 4.5896 -1.3286 0.0000 C 0 0 0 0 0 0 0 0 0 0 0 0 1.1273 -1.99…	Tiformin	C5 H12 N4 O	144.101	120	54
FALSE		C24 H44 O9	Full match	No results		476.298	13.216	9.55064e+08	0	No MS2	435967	50151.6	414612	3.20244e+08	3.38021e+08	1.00434e+06	826500	749317	568243	1.06024e+06	9.55064e+08	700710	970840	5.96649e+08	697465	1.87064e+08	1.27088e+08	879935	2.38826e+08	1.38487e+08	1.17474e+06	8.18251e+08	788625	873299	821775	2.67827e+08	2.42475e+08	888750	8.47805e+08	875068	839669	670549	861158	1.16058e+06	811717	674980	2.48184e+08	2.238e+08	7.25911e+08
	Checked	Structure	Name	Formula	Molecular Weight	CSID	# References
FALSE	Tetraacetylethylenediamine	C10 H16 N2 O4	Full match	Full match		228.111	1.176	9.51933e+08	6	No MS2	70403.5	64506.7	430298	6.67396e+07	7.32606e+07	1.32447e+07	7.89658e+06	9.02084e+06	8.19499e+06	9.97139e+06	1.03485e+08	1.6457e+07	1.17331e+07	4.83277e+07	835341	7.7098e+07	6.87581e+07	1.00714e+07	5.71389e+08	2.11575e+07	3.67063e+07	4.68514e+08	2.25484e+07	1.93096e+07	896021	7.02801e+07	6.48567e+07	1.28344e+07	2.12556e+07	3.46525e+06	6.07256e+06	8.08572e+06	8.02133e+06	1.14171e+07	3.79696e+07	906526	6.88633e+07	6.06099e+07	9.51933e+08
	Checked	Structure	Name	Formula	Molecular Weight	CSID	# References
	FALSE	# ACD/Labs04281711312D 32 31 0 0 0 0 0 0 0 0 1 V2000 6.6203 -0.8851 0.0000 O 0 0 0 0 0 0 0 0 0 0 0 0 9.4761 -5.8533 0.0000 O 0 0 0 0 0 0 0 0 0 0 0 0 5.1806 -6.6793 0.0000 O 0 0 0 0 0 0 0 0 0 0 0 0 2.3248 -1.7111 0.0000 O 0 0 0 0 0 0 0 0 0 0 0 0 8.0482 -3.3633 0.0000 N 0 0 0 0 0 0 0 0 0 0 0 0 3.7527 -4.2011 0.0000 N 0 0 0 0 0 0 0 0 0 0 0 0 6.6203 -4.2011 0.0000 C 0 0 0 0 0 0 0 0 0 0 0 0 5.1806 -3.…	Tetraacetylethylenediamine	C10 H16 N2 O4	228.111	59725	97
	FALSE	# ACD/Labs04111411492D 16 17 0 0 1 0 0 0 0 0 1 V2000 4.7735 -6.7138 0.0000 O 0 0 0 0 0 0 0 0 0 0 0 0 2.1753 -1.5979 0.0000 O 0 0 0 0 0 0 0 0 0 0 0 0 0.0000 -4.8541 0.0000 O 0 0 0 0 0 0 0 0 0 0 0 0 0.7117 -2.6654 0.0000 O 0 0 0 0 0 0 0 0 0 0 0 0 3.3300 -3.5919 0.0000 N 0 0 0 0 0 0 0 0 0 0 0 0 4.6191 -0.2753 0.0000 N 0 0 0 0 0 0 0 0 0 0 0 0 2.2491 -4.3707 0.0000 C 0 0 0 0 0 0 0 0 0 0 0 0 2.6654 -5.…	Pro-Hyp	C10 H16 N2 O4	228.111	10077215	43
	FALSE	#152416 -OEChem-02070708202D 32 32 0 1 0 0 0 0 0999 V2000 5.7281 -1.3383 0.0000 O 0 0 0 0 0 0 0 0 0 0 0 0 2.0000 -0.3601 0.0000 O 0 0 0 0 0 0 0 0 0 0 0 0 8.9085 0.3601 0.0000 O 0 0 0 0 0 0 0 0 0 0 0 0 7.7496 1.6473 0.0000 O 0 0 0 0 0 0 0 0 0 0 0 0 3.7601 -0.6389 0.0000 N 0 0 0 0 0 0 0 0 0 0 0 0 6.2633 0.3090 0.0000 N 0 0 0 0 0 0 0 0 0 0 0 0 4.5691 -0.0511 0.0000 C 0 0 1 0 0 0 0 0 0 0 0 0 4.2601 0…	Pyr-Val-OH	C10 H16 N2 O4	228.111	134331	30
	FALSE	# ACD/Labs04221415492D 16 16 0 0 1 0 0 0 0 0 1 V2000 0.4014 -3.4020 0.0000 O 0 0 0 0 0 0 0 0 0 0 0 0 1.0682 0.0000 0.0000 O 0 0 0 0 0 0 0 0 0 0 0 0 5.6064 -0.1293 0.0000 O 0 0 0 0 0 0 0 0 0 0 0 0 6.8039 -2.1296 0.0000 O 0 0 0 0 0 0 0 0 0 0 0 0 0.0000 -2.1296 0.0000 N 0 0 0 0 0 0 0 0 0 0 0 0 4.5382 -3.1979 0.0000 N 0 0 0 0 0 0 0 0 0 0 0 0 1.7350 -3.4020 0.0000 C 0 0 0 0 0 0 0 0 0 0 0 0 2.1364 -2.1…	3-(5-tert-Butyl-3-hydroxy-1,2-oxazol-4-yl)-L-alanine	C10 H16 N2 O4	228.111	394522	26
	FALSE	#3952518 -OEChem-02070709322D 32 33 0 1 0 0 0 0 0999 V2000 6.1807 -2.3454 0.0000 O 0 0 0 0 0 0 0 0 0 0 0 0 4.2268 1.5024 0.0000 O 0 0 0 0 0 0 0 0 0 0 0 0 2.5897 -0.9455 0.0000 O 0 0 0 0 0 0 0 0 0 0 0 0 3.1249 0.7018 0.0000 O 0 0 0 0 0 0 0 0 0 0 0 0 5.0929 0.0024 0.0000 N 0 0 0 0 0 0 0 0 0 0 0 0 6.0634 2.4970 0.0000 N 0 0 0 0 0 0 0 0 0 0 0 0 4.2839 -0.5853 0.0000 C 0 0 3 0 0 0 0 0 0 0 0 0 4.5929 -…	Prolyl-4-hydroxyproline	C10 H16 N2 O4	228.111	3173433	10
	FALSE	# ACD/Labs08121513492D 16 17 0 0 0 0 0 0 0 0 1 V2000 7.7746 0.0000 0.0000 O 0 0 0 0 0 0 0 0 0 0 0 0 6.6240 -0.6686 0.0000 C 0 0 0 0 0 0 0 0 0 0 0 0 5.4733 0.0000 0.0000 O 0 0 0 0 0 0 0 0 0 0 0 0 6.6240 -1.9981 0.0000 C 0 0 0 0 0 0 0 0 0 0 0 0 7.6969 -2.7755 0.0000 C 0 0 0 0 0 0 0 0 0 0 0 0 7.2848 -4.0428 0.0000 C 0 0 0 0 0 0 0 0 0 0 0 0 5.9554 -4.0428 0.0000 C 0 0 0 0 0 0 0 0 0 0 0 0 5.5433 -2.77…	4-Hydroxyprolylproline	C10 H16 N2 O4	228.111	35032807	1
FALSE	Bis(2-ethylhexyl) phthalate	C24 H38 O4	Full match	Full match		390.276	12.532	9.25029e+08	13	No MS2	825773	44722.6	575794	3.51921e+08	3.21186e+08	3.49734e+08	6.05209e+08	4.44048e+08	4.82094e+08	6.5258e+08	9.17507e+07	5.02808e+08	4.70823e+08	3.9987e+07	1.10533e+06	2.53372e+08	2.03009e+08	7.01571e+08	9.48615e+07	5.11698e+07	6.80453e+08	1.2475e+08	1.57021e+07	4.80085e+08	1.22335e+06	3.74014e+08	3.22935e+08	2.72353e+08	2.79548e+07	8.61199e+08	9.25029e+08	7.5083e+08	3.25022e+08	6.4657e+08	3.16068e+07	655716	3.29755e+08	2.88707e+08	1.58031e+08
	Checked	Structure	Name	Formula	Molecular Weight	CSID	# References
	FALSE	# ACD/Labs04221415492D 28 28 0 0 0 0 0 0 0 0 1 V2000 3.5072 -0.6621 0.0000 O 0 0 0 0 0 0 0 0 0 0 0 0 3.4968 -6.0211 0.0000 O 0 0 0 0 0 0 0 0 0 0 0 0 4.6452 -2.6692 0.0000 O 0 0 0 0 0 0 0 0 0 0 0 0 4.6555 -4.0244 0.0000 O 0 0 0 0 0 0 0 0 0 0 0 0 2.3174 -4.0037 0.0000 C 0 0 0 0 0 0 0 0 0 0 0 0 2.3174 -2.6692 0.0000 C 0 0 0 0 0 0 0 0 0 0 0 0 3.5072 -1.9967 0.0000 C 0 0 0 0 0 0 0 0 0 0 0 0 3.4968 -4.…	Bis(2-ethylhexyl) phthalate	C24 H38 O4	390.277	21106505	738
	FALSE	# ACD/Labs04281710332D 28 28 0 0 0 0 0 0 0 0 1 V2000 4.6055 -2.0132 0.0000 O 0 0 0 0 0 0 0 0 0 0 0 0 4.6055 -3.3507 0.0000 O 0 0 0 0 0 0 0 0 0 0 0 0 3.4472 0.0000 0.0000 O 0 0 0 0 0 0 0 0 0 0 0 0 3.4610 -5.5155 0.0000 O 0 0 0 0 0 0 0 0 0 0 0 0 2.3027 -2.0132 0.0000 C 0 0 0 0 0 0 0 0 0 0 0 0 2.3027 -3.3507 0.0000 C 0 0 0 0 0 0 0 0 0 0 0 0 3.4472 -1.3513 0.0000 C 0 0 0 0 0 0 0 0 0 0 0 0 3.4610 -4.0…	DNOP	C24 H38 O4	390.277	8043	359
	FALSE	# ACD/Labs04221415492D 28 28 0 0 0 0 0 0 0 0 1 V2000 3.4566 -0.6617 0.0000 O 0 0 0 0 0 0 0 0 0 0 0 0 3.4680 -6.1945 0.0000 O 0 0 0 0 0 0 0 0 0 0 0 0 4.6202 -2.6923 0.0000 O 0 0 0 0 0 0 0 0 0 0 0 0 4.6202 -4.0156 0.0000 O 0 0 0 0 0 0 0 0 0 0 0 0 2.3044 -2.6923 0.0000 C 0 0 0 0 0 0 0 0 0 0 0 0 2.3044 -4.0270 0.0000 C 0 0 0 0 0 0 0 0 0 0 0 0 3.4566 -2.0192 0.0000 C 0 0 0 0 0 0 0 0 0 0 0 0 3.4680 -4.…	Isooctyl phthalate	C24 H38 O4	390.277	31280	159
	FALSE	# ACD/Labs04281711352D 31 34 0 0 1 0 0 0 0 0 1 V2000 5.5534 -1.9370 0.0000 O 0 0 0 0 0 0 0 0 0 0 0 0 0.0000 -7.8337 0.0000 O 0 0 0 0 0 0 0 0 0 0 0 0 11.1437 0.0000 0.0000 O 0 0 0 0 0 0 0 0 0 0 0 0 12.2593 -1.9860 0.0000 O 0 0 0 0 0 0 0 0 0 0 0 0 4.4624 -5.2470 0.0000 C 0 0 0 0 0 0 0 0 0 0 0 0 6.7181 -3.9352 0.0000 C 0 0 0 0 0 0 0 0 0 0 0 0 3.3468 -5.9090 0.0000 C 0 0 0 0 0 0 0 0 0 0 0 0 5.5902 -5…	.alpha.-Apocholic acid	C24 H38 O4	390.277	91993	41
	FALSE	# ACD/Labs04281711492D 66 69 0 0 1 0 0 0 0 0 1 V2000 8.2858 -3.5996 0.0000 O 0 0 0 0 0 0 0 0 0 0 0 0 0.8829 -11.0534 0.0000 O 0 0 0 0 0 0 0 0 0 0 0 0 15.9773 -0.2037 0.0000 O 0 0 0 0 0 0 0 0 0 0 0 0 16.5716 -2.9883 0.0000 O 0 0 0 0 0 0 0 0 0 0 0 0 8.2858 -8.5065 0.0000 C 0 0 0 0 0 0 0 0 0 0 0 0 9.7121 -7.6915 0.0000 C 0 0 0 0 0 0 0 0 0 0 0 0 6.8765 -7.6915 0.0000 C 0 0 0 0 0 0 0 0 0 0 0 0 9.7121 …	12-Ketodeoxycholic acid	C24 H38 O4	390.277	2338365	29
	FALSE	# ACD/Labs04281712352D 66 69 0 0 1 0 0 0 0 0 1 V2000 7.4006 -3.5877 0.0000 O 0 0 0 0 0 0 0 0 0 0 0 0 0.0000 -11.0366 0.0000 O 0 0 0 0 0 0 0 0 0 0 0 0 15.0908 -0.2091 0.0000 O 0 0 0 0 0 0 0 0 0 0 0 0 15.6861 -2.9763 0.0000 O 0 0 0 0 0 0 0 0 0 0 0 0 8.8164 -6.0492 0.0000 C 0 0 0 0 0 0 0 0 0 0 0 0 8.8164 -7.6741 0.0000 C 0 0 0 0 0 0 0 0 0 0 0 0 7.4006 -8.4946 0.0000 C 0 0 0 0 0 0 0 0 0 0 0 0 5.9848 …	3-OXODEOXYCHOLIC ACID	C24 H38 O4	390.277	141233	22
	FALSE	# ACD/Labs04221415492D 33 36 0 0 1 0 0 0 0 0 1 V2000 5.6552 -1.8768 0.0000 O 0 0 0 0 0 0 0 0 0 0 0 0 0.0000 -7.7308 0.0000 O 0 0 0 0 0 0 0 0 0 0 0 0 11.3352 0.0000 0.0000 O 0 0 0 0 0 0 0 0 0 0 0 0 12.4289 -1.9638 0.0000 O 0 0 0 0 0 0 0 0 0 0 0 0 6.7613 -5.1332 0.0000 C 0 0 0 0 0 0 0 0 0 0 0 0 5.6427 -5.7919 0.0000 C 0 0 0 0 0 0 0 0 0 0 0 0 4.5241 -5.1207 0.0000 C 0 0 0 0 0 0 0 0 0 0 0 0 6.7862 -3…	3alpha,12alpha-Dihydroxy-5beta-chol-6-en-24-oic acid	C24 H38 O4	390.277	391559	12
	FALSE	# ACD/Labs06201713272D 32 35 0 0 1 0 0 0 0 0 1 V2000 4.8976 -7.1636 0.0000 H 0 0 0 0 0 0 0 0 0 0 0 0 4.8558 -6.0254 0.0000 C 0 0 0 0 0 0 0 0 0 0 0 0 4.9394 -4.6678 0.0000 C 0 0 0 0 0 0 0 0 0 0 0 0 6.1507 -4.0517 0.0000 C 0 0 0 0 0 0 0 0 0 0 0 0 7.2889 -4.8036 0.0000 C 0 0 0 0 0 0 0 0 0 0 0 0 7.6022 -3.4774 0.0000 C 0 0 0 0 0 0 0 0 0 0 0 0 8.6047 -4.4486 0.0000 C 0 0 0 0 0 0 0 0 0 0 0 0 9.3461 -5.…	(3alpha,5beta,17xi,20S)-3-Hydroxy-7-oxocholan-24-oic acid	C24 H38 O4	390.277	59651435	5
	FALSE	# ACD/Labs06201713272D 32 35 0 0 1 0 0 0 0 0 1 V2000 5.5835 -3.9604 0.0000 H 0 0 0 0 0 0 0 0 0 0 0 0 5.7263 -4.9342 0.0000 C 0 0 0 0 0 0 0 0 0 0 0 0 5.8042 -6.2846 0.0000 C 0 0 0 0 0 0 0 0 0 0 0 0 4.6745 -7.0378 0.0000 C 0 0 0 0 0 0 0 0 0 0 0 0 3.4669 -6.4275 0.0000 C 0 0 0 0 0 0 0 0 0 0 0 0 2.3373 -7.1676 0.0000 C 0 0 0 0 0 0 0 0 0 0 0 0 1.1297 -6.5573 0.0000 C 0 0 0 0 0 0 0 0 0 0 0 0 1.0518 -5.…	(5alpha,7beta,17xi)-7-Hydroxy-3-oxocholan-24-oic acid	C24 H38 O4	390.277	59651434	4
	FALSE	# ACD/Labs08121513442D 28 29 0 0 1 0 0 0 0 0 1 V2000 0.0000 -5.3208 0.0000 C 0 0 0 0 0 0 0 0 0 0 0 0 1.1555 -5.9927 0.0000 C 0 0 0 0 0 0 0 0 0 0 0 0 2.3111 -5.3208 0.0000 C 0 0 0 0 0 0 0 0 0 0 0 0 2.3111 -3.9906 0.0000 C 0 0 0 0 0 0 0 0 0 0 0 0 3.4532 -3.3322 0.0000 C 0 0 0 0 0 0 0 0 0 0 0 0 3.4532 -2.0020 0.0000 C 0 0 0 0 0 0 0 0 0 0 0 0 4.6087 -1.3302 0.0000 C 0 0 0 0 0 0 0 0 0 0 0 0 2.3111 -1.…	(6S)-9-[(2S)-6-Hydroxy-2,5,7,8-tetramethyl-3,4-dihydro-2H-chromen-2-yl]-2,6-dimethylnonanoic acid	C24 H38 O4	390.277	35032551	4
	FALSE	# SciTegic04031415222D 28 28 0 0 0 0 0 0 0 0999 V2000 0.0000 0.0000 0.0000 C 0 0 0 0 0 0 0 0 0 0 0 0 1.1513 -0.6678 0.0000 C 0 0 0 0 0 0 0 0 0 0 0 0 2.3027 0.0000 0.0000 C 0 0 0 0 0 0 0 0 0 0 0 0 3.4540 -0.6678 0.0000 C 0 0 0 0 0 0 0 0 0 0 0 0 4.6054 0.0000 0.0000 C 0 0 0 0 0 0 0 0 0 0 0 0 5.7567 -0.6678 0.0000 C 0 0 0 0 0 0 0 0 0 0 0 0 6.9081 0.0000 0.0000 C 0 0 0 0 0 0 0 0 0 0 0 0 8.0594 -0.667…	2-[(8E)-8-Heptadecen-1-yl]-4,6-dihydroxybenzoic acid	C24 H38 O4	390.277	30777574	4
	FALSE	# ACD/Labs06201713272D 32 35 0 0 1 0 0 0 0 0 1 V2000 1.1538 -8.8530 0.0000 C 0 0 0 0 0 0 0 0 0 0 0 0 1.1538 -7.5255 0.0000 C 0 0 0 0 0 0 0 0 0 0 0 0 2.2975 -6.8618 0.0000 C 0 0 0 0 0 0 0 0 0 0 0 0 3.4513 -7.5255 0.0000 C 0 0 0 0 0 0 0 0 0 0 0 0 4.6052 -6.8618 0.0000 C 0 0 0 0 0 0 0 0 0 0 0 0 4.6052 -5.5242 0.0000 C 0 0 0 0 0 0 0 0 0 0 0 0 5.7590 -4.8604 0.0000 C 0 0 0 0 0 0 0 0 0 0 0 0 6.9027 -5.…	(5beta,7alpha,17xi)-7-Hydroxy-3-oxocholan-24-oic acid	C24 H38 O4	390.277	59651439	3
	FALSE	# ACD/Labs08091917312D 33 36 0 0 1 0 0 0 0 0 1 V2000 0.0000 -7.9800 0.0000 C 0 0 0 0 0 0 0 0 0 0 0 0 0.0000 -7.9800 0.0000 C 0 0 0 0 0 0 0 0 0 0 0 0 0.0000 0.0000 0.0000 C 0 0 0 0 0 0 0 0 0 0 0 0 0.0000 0.0000 0.0000 C 0 0 0 0 0 0 0 0 0 0 0 0 0.0000 0.0000 0.0000 C 0 0 0 0 0 0 0 0 0 0 0 0 0.0000 -7.9800 0.0000 C 0 0 0 0 0 0 0 0 0 0 0 0 0.0000 -7.9800 0.0000 C 0 0 0 0 0 0 0 0 0 0 0 0 0.0000 -7.980…	(8xi,9xi,14beta,17xi)-7-Hydroxy-3-oxocholan-24-oic acid	C24 H38 O4	390.277	74854253	1
FALSE			No results	No results		131.093	2.457	9.21817e+08	0	No MS2	614689	45090.8	448795	5.90901e+08	5.52817e+08	5.16746e+07	4.37697e+08	8.64668e+07	4.67734e+08	7.24575e+08	6.73899e+08	5.81251e+08	7.89074e+07	6.89943e+08	2.87027e+06	5.63134e+08	4.9452e+08	5.46727e+07	5.45387e+07	9.50926e+07	7.0274e+08	6.45804e+08	9.21817e+08	7.42065e+08	1.7579e+06	7.34858e+08	6.81318e+08	8.56557e+07	6.11657e+08	1.63803e+08	8.98754e+07	3.85245e+08	5.77261e+07	2.60441e+07	5.28813e+08	2.74374e+06	6.20441e+08	6.08402e+08	7.55893e+08
	Checked	Structure	Name	Formula	Molecular Weight	CSID	# References
FALSE	Cyclohexylamine	C6 H13 N	Full match	Full match		99.1051	4.016	9.20163e+08	2	No MS2	1.54396e+06	24598	27931.8	1.23574e+06	1.1788e+06	1.16314e+06	368548	635862	542886	863643	892973	423272	963417	940911	131638	818365	670520	471880	690662	466427	1.0383e+06	825442	968307	1.10701e+06	152058	921214	1.07346e+06	1.07405e+06	883382	2.51654e+07	699859	285866	675480	1.1281e+06	1.81293e+06	144574	999960	1.0005e+06	965253
	Checked	Structure	Name	Formula	Molecular Weight	CSID	# References
	FALSE	# ACD/Labs04281710322D 7 7 0 0 0 0 0 0 0 0 1 V2000 2.6598 -3.4543 0.0000 N 0 0 0 0 0 0 0 0 0 0 0 0 1.9931 -2.3040 0.0000 C 0 0 0 0 0 0 0 0 0 0 0 0 2.6598 -1.1503 0.0000 C 0 0 0 0 0 0 0 0 0 0 0 0 1.9931 0.0000 0.0000 C 0 0 0 0 0 0 0 0 0 0 0 0 0.6632 0.0000 0.0000 C 0 0 0 0 0 0 0 0 0 0 0 0 0.0000 -1.1503 0.0000 C 0 0 0 0 0 0 0 0 0 0 0 0 0.6632 -2.3040 0.0000 C 0 0 0 0 0 0 0 0 0 0 0 0 1 2 1 0 0 0 0 …	Cyclohexylamine	C6 H13 N	99.1048	7677	853
	FALSE	# CDK 04291007012D 7 7 0 0 0 0 999 V2000 0.7145 2.0625 0.0000 C 0 0 0 0 0 0 0 0 0 0 0 0 0.7145 1.2375 0.0000 C 0 0 0 0 0 0 0 0 0 0 0 0 1.4289 0.8250 0.0000 C 0 0 0 0 0 0 0 0 0 0 0 0 1.4289 -0.0000 0.0000 C 0 0 0 0 0 0 0 0 0 0 0 0 0.7145 -0.4125 0.0000 C 0 0 0 0 0 0 0 0 0 0 0 0 0.0000 0.0000 0.0000 C 0 0 0 0 0 0 0 0 0 0 0 0 0.0000 0.8250 0.0000 N 0 0 0 0 0 0 0 0 0 0 0 0 1 2 1 0 0 0 0 2 3 1 0 0 0 0…	4244	C6 H13 N	99.1048	7686	194
FALSE	12-HSA	C18 H36 O3	Full match	Full match		300.266	14.314	9.14231e+08	14	No MS2	134336	25230.6	150071	1.14766e+08	1.38016e+08	1.17019e+08	3.06776e+08	3.54804e+07	6.1827e+07	4.90234e+08	9.40941e+07	4.13911e+07	5.99234e+07	9.2567e+07	775680	7.91038e+07	6.07478e+07	1.34861e+08	4.46416e+07	7.48803e+07	8.6585e+07	6.41903e+07	1.63433e+07	3.54276e+07	1.64958e+06	1.21593e+08	1.02316e+08	1.11832e+08	1.54999e+08	6.22723e+07	5.77307e+07	8.05873e+07	4.54149e+08	2.04733e+07	2.25419e+07	1.89383e+06	9.82257e+07	1.05215e+08	7.18011e+07
	Checked	Structure	Name	Formula	Molecular Weight	CSID	# References
	FALSE	#7789 -OEChem-02070708202D 57 56 0 1 0 0 0 0 0999 V2000 7.1962 -1.0950 0.0000 O 0 0 0 0 0 0 0 0 0 0 0 0 17.5885 -0.0950 0.0000 O 0 0 0 0 0 0 0 0 0 0 0 0 16.7224 1.4050 0.0000 O 0 0 0 0 0 0 0 0 0 0 0 0 8.0622 0.4050 0.0000 C 0 0 0 0 0 0 0 0 0 0 0 0 7.1962 -0.0950 0.0000 C 0 0 3 0 0 0 0 0 0 0 0 0 8.9282 -0.0950 0.0000 C 0 0 0 0 0 0 0 0 0 0 0 0 9.7942 0.4050 0.0000 C 0 0 0 0 0 0 0 0 0 0 0 0 10.6603 …	12-HSA	C18 H36 O3	300.266	7501	282
	FALSE	# ACD/Labs04111411492D 21 20 0 0 0 0 0 0 0 0 1 V2000 2.3086 -2.0045 0.0000 C 0 0 0 0 0 0 0 0 0 0 0 0 2.3086 -3.3316 0.0000 C 0 0 0 0 0 0 0 0 0 0 0 0 1.1474 -1.3409 0.0000 C 0 0 0 0 0 0 0 0 0 0 0 0 1.1474 -3.9952 0.0000 C 0 0 0 0 0 0 0 0 0 0 0 0 0.0000 -2.0045 0.0000 C 0 0 0 0 0 0 0 0 0 0 0 0 0.0000 -3.3316 0.0000 C 0 0 0 0 0 0 0 0 0 0 0 0 3.4560 -1.3409 0.0000 C 0 0 0 0 0 0 0 0 0 0 0 0 4.6035 -2.…	hydroxystearic acid	C18 H36 O3	300.266	62625	171
	FALSE	#9561835 -OEChem-02070711522D 57 56 0 1 0 0 0 0 0999 V2000 8.9282 -1.0950 0.0000 O 0 0 0 0 0 0 0 0 0 0 0 0 17.5885 -0.0950 0.0000 O 0 0 0 0 0 0 0 0 0 0 0 0 16.7224 1.4050 0.0000 O 0 0 0 0 0 0 0 0 0 0 0 0 8.9282 -0.0950 0.0000 C 0 0 3 0 0 0 0 0 0 0 0 0 9.7942 0.4050 0.0000 C 0 0 0 0 0 0 0 0 0 0 0 0 8.0622 0.4050 0.0000 C 0 0 0 0 0 0 0 0 0 0 0 0 10.6603 -0.0950 0.0000 C 0 0 0 0 0 0 0 0 0 0 0 0 7.19…	10-hydroxystearic acid	C18 H36 O3	300.266	7838048	98
	FALSE	#9570127 -OEChem-02070711532D 57 56 0 1 0 0 0 0 0999 V2000 9.7942 -0.5950 0.0000 O 0 0 0 0 0 0 0 0 0 0 0 0 17.5885 0.9050 0.0000 O 0 0 0 0 0 0 0 0 0 0 0 0 16.7224 -0.5950 0.0000 O 0 0 0 0 0 0 0 0 0 0 0 0 9.7942 0.4050 0.0000 C 0 0 3 0 0 0 0 0 0 0 0 0 8.9282 0.9050 0.0000 C 0 0 0 0 0 0 0 0 0 0 0 0 10.6603 0.9050 0.0000 C 0 0 0 0 0 0 0 0 0 0 0 0 8.0622 0.4050 0.0000 C 0 0 0 0 0 0 0 0 0 0 0 0 11.526…	9-Hydroxyoctadecanoic acid	C18 H36 O3	300.266	7844595	44
	FALSE	#102607 -OEChem-02070708192D 57 56 0 1 0 0 0 0 0999 V2000 12.3923 -1.0950 0.0000 O 0 0 0 0 0 0 0 0 0 0 0 0 17.5885 -0.0950 0.0000 O 0 0 0 0 0 0 0 0 0 0 0 0 16.7224 1.4050 0.0000 O 0 0 0 0 0 0 0 0 0 0 0 0 9.7942 0.4050 0.0000 C 0 0 0 0 0 0 0 0 0 0 0 0 10.6603 -0.0950 0.0000 C 0 0 0 0 0 0 0 0 0 0 0 0 8.9282 -0.0950 0.0000 C 0 0 0 0 0 0 0 0 0 0 0 0 11.5263 0.4050 0.0000 C 0 0 0 0 0 0 0 0 0 0 0 0 8.0…	6-Hydroxyoctadecanoic acid	C18 H36 O3	300.266	92679	18
	FALSE	#5282911 -OEChem-02070710102D 57 56 0 1 0 0 0 0 0999 V2000 6.3301 -0.5950 0.0000 O 0 0 0 0 0 0 0 0 0 0 0 0 17.5885 0.9050 0.0000 O 0 0 0 0 0 0 0 0 0 0 0 0 16.7224 -0.5950 0.0000 O 0 0 0 0 0 0 0 0 0 0 0 0 8.0622 0.4050 0.0000 C 0 0 0 0 0 0 0 0 0 0 0 0 8.9282 0.9050 0.0000 C 0 0 0 0 0 0 0 0 0 0 0 0 7.1962 0.9050 0.0000 C 0 0 0 0 0 0 0 0 0 0 0 0 9.7942 0.4050 0.0000 C 0 0 0 0 0 0 0 0 0 0 0 0 6.3301 …	13-Hydroxyoctadecanoic acid	C18 H36 O3	300.266	4446038	14
	FALSE	#5312838 -OEChem-02070710132D 57 56 0 1 0 0 0 0 0999 V2000 14.9904 -0.5950 0.0000 O 0 0 0 0 0 0 0 0 0 0 0 0 17.5885 0.9050 0.0000 O 0 0 0 0 0 0 0 0 0 0 0 0 16.7224 -0.5950 0.0000 O 0 0 0 0 0 0 0 0 0 0 0 0 9.7942 0.4050 0.0000 C 0 0 0 0 0 0 0 0 0 0 0 0 8.9282 0.9050 0.0000 C 0 0 0 0 0 0 0 0 0 0 0 0 10.6603 0.9050 0.0000 C 0 0 0 0 0 0 0 0 0 0 0 0 8.0622 0.4050 0.0000 C 0 0 0 0 0 0 0 0 0 0 0 0 11.52…	(3R)-3-Hydroxyoctadecanoic acid	C18 H36 O3	300.266	4472263	14
	FALSE	#361944 -OEChem-02070708242D 57 56 0 1 0 0 0 0 0999 V2000 10.6603 -1.0950 0.0000 O 0 0 0 0 0 0 0 0 0 0 0 0 17.5885 -0.0950 0.0000 O 0 0 0 0 0 0 0 0 0 0 0 0 16.7224 1.4050 0.0000 O 0 0 0 0 0 0 0 0 0 0 0 0 10.6603 -0.0950 0.0000 C 0 0 3 0 0 0 0 0 0 0 0 0 9.7942 0.4050 0.0000 C 0 0 0 0 0 0 0 0 0 0 0 0 8.9282 -0.0950 0.0000 C 0 0 0 0 0 0 0 0 0 0 0 0 8.0622 0.4050 0.0000 C 0 0 0 0 0 0 0 0 0 0 0 0 11.5…	8-Hydroxyoctadecanoic acid	C18 H36 O3	300.266	321293	13
	FALSE	# ACD/Labs04221415492D 21 20 0 0 1 0 0 0 0 0 1 V2000 18.4452 -3.3197 0.0000 O 0 0 0 0 0 0 0 0 0 0 0 0 19.6071 0.0000 0.0000 O 0 0 0 0 0 0 0 0 0 0 0 0 20.7483 -1.9918 0.0000 O 0 0 0 0 0 0 0 0 0 0 0 0 18.4452 -1.9918 0.0000 C 0 0 0 0 0 0 0 0 0 0 0 0 19.6071 -1.3279 0.0000 C 0 0 0 0 0 0 0 0 0 0 0 0 17.3041 -1.3279 0.0000 C 0 0 0 0 0 0 0 0 0 0 0 0 16.1422 -1.9918 0.0000 C 0 0 0 0 0 0 0 0 0 0 0 0 14.9…	(R)-2-hydroxystearic acid	C18 H36 O3	300.266	388921	12
	FALSE	# ACD/Labs04221415492D 21 20 0 0 1 0 0 0 0 0 1 V2000 18.4452 -3.3197 0.0000 O 0 0 0 0 0 0 0 0 0 0 0 0 19.6071 0.0000 0.0000 O 0 0 0 0 0 0 0 0 0 0 0 0 20.7483 -1.9918 0.0000 O 0 0 0 0 0 0 0 0 0 0 0 0 18.4452 -1.9918 0.0000 C 0 0 0 0 0 0 0 0 0 0 0 0 19.6071 -1.3279 0.0000 C 0 0 0 0 0 0 0 0 0 0 0 0 17.3041 -1.3279 0.0000 C 0 0 0 0 0 0 0 0 0 0 0 0 16.1422 -1.9918 0.0000 C 0 0 0 0 0 0 0 0 0 0 0 0 14.9…	(S)-2-hydroxystearic acid	C18 H36 O3	300.266	388923	11
	FALSE	# ACD/Labs04281712362D 21 20 0 0 1 0 0 0 0 0 1 V2000 11.5303 -3.9957 0.0000 O 0 0 0 0 0 0 0 0 0 0 0 0 0.0000 -2.6638 0.0000 O 0 0 0 0 0 0 0 0 0 0 0 0 1.1543 -0.6596 0.0000 O 0 0 0 0 0 0 0 0 0 0 0 0 11.5303 -2.6638 0.0000 C 0 0 0 0 0 0 0 0 0 0 0 0 10.3760 -2.0042 0.0000 C 0 0 0 0 0 0 0 0 0 0 0 0 12.6846 -2.0042 0.0000 C 0 0 0 0 0 0 0 0 0 0 0 0 9.2217 -2.6638 0.0000 C 0 0 0 0 0 0 0 0 0 0 0 0 12.684…	(10R)-10-hydroxystearic acid	C18 H36 O3	300.266	12003	11
	FALSE	#5282910 -OEChem-02070710102D 57 56 0 1 0 0 0 0 0999 V2000 8.0622 -0.5950 0.0000 O 0 0 0 0 0 0 0 0 0 0 0 0 17.5885 0.9050 0.0000 O 0 0 0 0 0 0 0 0 0 0 0 0 16.7224 -0.5950 0.0000 O 0 0 0 0 0 0 0 0 0 0 0 0 8.0622 0.4050 0.0000 C 0 0 3 0 0 0 0 0 0 0 0 0 8.9282 0.9050 0.0000 C 0 0 0 0 0 0 0 0 0 0 0 0 9.7942 0.4050 0.0000 C 0 0 0 0 0 0 0 0 0 0 0 0 7.1962 0.9050 0.0000 C 0 0 0 0 0 0 0 0 0 0 0 0 10.6603…	11-Hydroxyoctadecanoic acid	C18 H36 O3	300.266	4446037	10
	FALSE	#5282909 -OEChem-02070710102D 57 56 0 1 0 0 0 0 0999 V2000 13.2583 -0.5950 0.0000 O 0 0 0 0 0 0 0 0 0 0 0 0 17.5885 0.9050 0.0000 O 0 0 0 0 0 0 0 0 0 0 0 0 16.7224 -0.5950 0.0000 O 0 0 0 0 0 0 0 0 0 0 0 0 9.7942 0.4050 0.0000 C 0 0 0 0 0 0 0 0 0 0 0 0 10.6603 0.9050 0.0000 C 0 0 0 0 0 0 0 0 0 0 0 0 8.9282 0.9050 0.0000 C 0 0 0 0 0 0 0 0 0 0 0 0 11.5263 0.4050 0.0000 C 0 0 0 0 0 0 0 0 0 0 0 0 8.06…	5-Hydroxyoctadecanoic acid	C18 H36 O3	300.266	4446036	6
	FALSE	#516995 -OEChem-02070708262D 57 56 0 1 0 0 0 0 0999 V2000 11.5263 -0.5950 0.0000 O 0 0 0 0 0 0 0 0 0 0 0 0 17.5885 0.9050 0.0000 O 0 0 0 0 0 0 0 0 0 0 0 0 16.7224 -0.5950 0.0000 O 0 0 0 0 0 0 0 0 0 0 0 0 10.6603 0.9050 0.0000 C 0 0 0 0 0 0 0 0 0 0 0 0 9.7942 0.4050 0.0000 C 0 0 0 0 0 0 0 0 0 0 0 0 11.5263 0.4050 0.0000 C 0 0 3 0 0 0 0 0 0 0 0 0 8.9282 0.9050 0.0000 C 0 0 0 0 0 0 0 0 0 0 0 0 8.062…	7-Hydroxyoctadecanoic acid	C18 H36 O3	300.266	451049	5
FALSE		C26 H52 N8 O	Full match	No results		492.428	12.859	9.11378e+08	0	No MS2	208390	26839.2	209729	5.56197e+07	3.87019e+07	685935	402772	458784	391777	563913	9.11378e+08	471186	572051	2.76636e+08	375170	2.69014e+07	1.72649e+07	520517	2.17361e+07	9.98592e+06	695544	5.8005e+08	419974	586705	429946	3.5638e+07	3.52821e+07	631342	6.53466e+08	446876	593599	388318	453609	703841	405994	403286	3.06798e+07	3.11523e+07	4.41689e+08
	Checked	Structure	Name	Formula	Molecular Weight	CSID	# References
FALSE		C24 H47 N O4 P2	Full match	No results		475.298	9.765	9.08704e+08	0	No MS2	237463	12485.2	13789.7	513250	666094	218799	4.58394e+08	113489	6.50521e+07	7.39146e+08	2.80279e+06	100479	163250	1.34155e+06	100687	231617	245624	1.37893e+08	297149	273509	181803	2.89474e+06	550182	148717	120771	421718	332068	167954	2.73347e+06	7.85865e+07	187576	9.49315e+07	6.14627e+08	306695	5.42871e+06	107352	388755	376018	2.66078e+06
	Checked	Structure	Name	Formula	Molecular Weight	CSID	# References
FALSE	Linoleamide	C18 H33 N O	Full match	Full match		279.256	13.197	9.05973e+08	1	No MS2	324837	28092.1	299014	2.4579e+08	2.56496e+08	2.92966e+08	3.49079e+08	1.36657e+08	8.51554e+07	3.60282e+08	9.05973e+08	8.40999e+07	1.68974e+08	6.21452e+08	848652	1.86517e+08	1.46621e+08	1.73443e+08	7.78917e+08	2.92845e+08	2.84178e+08	5.39251e+08	1.3079e+08	1.03703e+08	938837	2.23241e+08	2.33231e+08	1.81863e+08	6.61158e+08	2.33476e+08	1.56663e+08	1.48229e+08	4.22187e+08	2.58612e+08	1.78894e+08	855895	2.19666e+08	2.28416e+08	7.5745e+08
	Checked	Structure	Name	Formula	Molecular Weight	CSID	# References
	FALSE	# ACD/Labs04281711442D 53 52 0 0 0 0 0 0 0 0 1 V2000 17.7867 -3.1838 0.0000 O 0 0 0 0 0 0 0 0 0 0 0 0 16.2748 -0.5514 0.0000 N 0 0 0 0 0 0 0 0 0 0 0 0 13.2333 -7.5594 0.0000 C 0 0 0 0 0 0 0 0 0 0 0 0 11.7214 -8.4309 0.0000 C 0 0 0 0 0 0 0 0 0 0 0 0 13.2333 -5.7985 0.0000 C 0 0 0 0 0 0 0 0 0 0 0 0 11.7214 -10.1918 0.0000 C 0 0 0 0 0 0 0 0 0 0 0 0 14.7452 -4.9269 0.0000 C 0 0 0 0 0 0 0 0 0 0 0 0 10…	Linoleamide	C18 H33 N O	279.256	4940587	69
FALSE	Leu-Leu	C12 H24 N2 O3	Full match	Full match		244.178	9.012	9.03172e+08	5	No MS2	364535	29700.5	173890	5.27516e+07	5.13797e+07	7.7518e+08	1.67939e+08	2.74219e+08	2.39102e+08	2.97856e+08	3.5417e+08	2.05003e+08	6.27072e+08	3.31521e+08	313682	5.30216e+07	4.35084e+07	6.2028e+08	7.74318e+08	4.97938e+08	7.93525e+08	6.74662e+08	1.61477e+06	4.5e+08	338652	9.35267e+07	9.12086e+07	5.50147e+08	4.7049e+08	2.77569e+06	5.01883e+08	4.27915e+08	2.32008e+08	2.99341e+08	4.87328e+07	328445	1.29449e+08	1.31756e+08	8.67976e+08
	Checked	Structure	Name	Formula	Molecular Weight	CSID	# References
	FALSE	# ACD/Labs04221415492D 17 16 0 0 0 0 0 0 0 0 1 V2000 2.3666 -5.3194 0.0000 O 0 0 0 0 0 0 0 0 0 0 0 0 5.7590 -2.0076 0.0000 O 0 0 0 0 0 0 0 0 0 0 0 0 6.9240 -3.9932 0.0000 O 0 0 0 0 0 0 0 0 0 0 0 0 3.4584 -3.3338 0.0000 N 0 0 0 0 0 0 0 0 0 0 0 0 0.0000 -3.9932 0.0000 N 0 0 0 0 0 0 0 0 0 0 0 0 4.6160 -4.0006 0.0000 C 0 0 0 0 0 0 0 0 0 0 0 0 2.3080 -3.9932 0.0000 C 0 0 0 0 0 0 0 0 0 0 0 0 1.1503 -3.…	Leu-Leu	C12 H24 N2 O3	244.179	85053	73
	FALSE	# ACD/Labs04221415492D 17 16 0 0 0 0 0 0 0 0 1 V2000 6.9367 -3.3393 0.0000 O 0 0 0 0 0 0 0 0 0 0 0 0 15.0026 0.0000 0.0000 O 0 0 0 0 0 0 0 0 0 0 0 0 16.1318 -2.0003 0.0000 O 0 0 0 0 0 0 0 0 0 0 0 0 8.0659 -1.3389 0.0000 N 0 0 0 0 0 0 0 0 0 0 0 0 0.0000 -2.0003 0.0000 N 0 0 0 0 0 0 0 0 0 0 0 0 6.9367 -2.0003 0.0000 C 0 0 0 0 0 0 0 0 0 0 0 0 5.7268 -1.3389 0.0000 C 0 0 0 0 0 0 0 0 0 0 0 0 9.1951 -2…	6-[(6-Aminohexanoyl)amino]hexanoic acid	C12 H24 N2 O3	244.179	871	40
	FALSE	#435718 -OEChem-02070708252D 41 40 0 1 0 0 0 0 0999 V2000 6.3301 -1.4400 0.0000 O 0 0 0 0 0 0 0 0 0 0 0 0 3.7321 -1.9400 0.0000 O 0 0 0 0 0 0 0 0 0 0 0 0 5.4641 -1.9400 0.0000 O 0 0 0 0 0 0 0 0 0 0 0 0 5.4641 0.0600 0.0000 N 0 0 0 0 0 0 0 0 0 0 0 0 8.0622 -0.4400 0.0000 N 0 0 0 0 0 0 0 0 0 0 0 0 3.7321 0.0600 0.0000 C 0 0 3 0 0 0 0 0 0 0 0 0 4.5981 -0.4400 0.0000 C 0 0 3 0 0 0 0 0 0 0 0 0 7.1962 …	leu-ile	C12 H24 N2 O3	244.179	385345	10
	FALSE	# ACD/Labs01300718572D 17 16 0 0 0 0 0 0 0 0 2 V2000 4.6340 -3.4477 0.0000 C 0 0 0 0 0 0 0 0 0 0 0 0 3.9732 -2.2931 0.0000 N 0 0 0 0 0 0 0 0 0 0 0 0 2.6514 -2.3091 0.0000 C 0 0 0 0 0 0 0 0 0 0 0 0 1.9906 -3.4477 0.0000 C 0 0 0 0 0 0 0 0 0 0 0 0 5.9637 -3.4477 0.0000 C 0 0 0 0 0 0 0 0 0 0 0 0 6.6405 -4.6022 0.0000 N 0 3 0 0 0 0 0 0 0 0 0 0 3.9732 -4.5942 0.0000 O 0 0 0 0 0 0 0 0 0 0 0 0 0.6529 -3.…	Ile-Ile	C12 H24 N2 O3	244.179	10439627	9
	FALSE	# ACD/Labs05010700192D 17 16 0 0 0 0 0 0 0 0 1 V2000 2.5048 -6.5060 0.0000 C 0 0 0 0 0 0 0 0 0 0 0 0 3.7540 -6.5060 0.0000 C 0 0 0 0 0 0 0 0 0 0 0 0 4.3851 -5.4195 0.0000 C 0 0 0 0 0 0 0 0 0 0 0 0 5.6342 -5.4195 0.0000 C 0 0 0 0 0 0 0 0 0 0 0 0 3.7540 -4.3395 0.0000 C 0 0 0 0 0 0 0 0 0 0 0 0 4.3851 -3.2530 0.0000 C 0 0 0 0 0 0 0 0 0 0 0 0 5.6342 -3.2530 0.0000 O 0 0 0 0 0 0 0 0 0 0 0 0 3.7540 -2.…	ile-leu	C12 H24 N2 O3	244.179	14526373	7
FALSE			No results	No results		87.1053	3.93	9.02931e+08	0	No MS2	9.02931e+08	23655.1	23817	4.27248e+06	4.00912e+06	3.21793e+06	1.13394e+06	2.09177e+06	1.14046e+06	2.25389e+06	3.49978e+06	1.73904e+06	3.28713e+06	2.02731e+06	114627	3.04337e+06	2.66692e+06	3.50575e+06	1.95989e+06	1.93128e+06	2.28067e+06	2.82998e+06	5.95252e+06	2.04192e+06	129055	3.76106e+06	3.82295e+06	3.19676e+06	3.90239e+06	325156	2.64898e+06	1.17375e+06	1.71244e+06	3.14145e+06	3.25163e+06	122006	3.838e+06	3.67474e+06	2.38462e+06
	Checked	Structure	Name	Formula	Molecular Weight	CSID	# References
FALSE		C22 H43 N O3 P2	Full match	No results		431.272	9.431	8.99637e+08	0	No MS2	251514	11848.3	13086.2	1.04215e+06	894411	452465	4.61345e+08	221592	4.48889e+07	7.72854e+08	5.256e+06	155359	262770	2.47131e+06	95070.6	563777	389891	1.37749e+08	528807	179444	360242	5.32834e+06	645421	184913	113550	719515	849277	205907	3.1983e+06	7.1067e+07	260957	6.93645e+07	5.43382e+08	566143	4.56117e+06	102171	651167	541309	4.79494e+06
	Checked	Structure	Name	Formula	Molecular Weight	CSID	# References
FALSE		C25 H46 N4 O9	Full match	No results		546.324	10.236	8.95e+08	0	No MS2	334831	23919	705671	314256	338570	324305	7.12117e+08	271290	5.92047e+07	8.42709e+08	624408	219741	304397	320796	213618	246370	291095	9.80396e+07	240391	306751	319716	778721	434010	286526	257970	284529	279477	318598	468606	1.5864e+07	295831	7.72575e+07	6.51284e+08	325448	1.46504e+06	217308	274419	307443	538895
	Checked	Structure	Name	Formula	Molecular Weight	CSID	# References
FALSE			No results	No results		188.104	10.718	8.84758e+08	0	No MS2	556012	47190.5	665588	4.88175e+08	4.92841e+08	4.49151e+08	6.29571e+07	3.22978e+08	1.85393e+08	1.32046e+07	4.0909e+08	3.48168e+08	4.52983e+08	3.2068e+08	1.13756e+07	3.91538e+08	3.6556e+08	1.93153e+08	3.91428e+08	3.78776e+08	4.0617e+08	3.69033e+08	2.20385e+08	4.15072e+08	1.17955e+07	4.15329e+08	4.36506e+08	4.80717e+08	4.42756e+08	1.62433e+08	4.26865e+08	1.67211e+08	7.65176e+07	4.17928e+08	2.49784e+08	1.30796e+07	4.22057e+08	4.23813e+08	4.49776e+08
	Checked	Structure	Name	Formula	Molecular Weight	CSID	# References
FALSE			No results	No results		72.0581	2.573	8.61729e+08	0	No MS2	1.01412e+06	21513.3	21806.4	1.34013e+07	1.31774e+07	9.27316e+06	1.32105e+07	1.15687e+07	2.7981e+07	1.07372e+07	5.04391e+07	1.01307e+07	1.2435e+07	1.11642e+07	155428	1.52032e+07	1.42391e+07	4.6148e+07	8.61729e+08	1.38591e+07	6.42197e+06	8.89942e+06	9.17865e+06	3.26429e+07	197872	1.62535e+07	1.59151e+07	1.82472e+07	1.56986e+07	1.23314e+06	1.45368e+07	2.58079e+07	7.74938e+06	6.25794e+06	1.12931e+07	142839	2.01835e+07	1.89039e+07	2.72723e+07
	Checked	Structure	Name	Formula	Molecular Weight	CSID	# References
FALSE		C26 H48 O9	Full match	No results		504.329	14.088	8.61547e+08	0	No MS2	768113	83441.9	629339	6.84881e+08	6.21022e+08	2.97089e+06	3.26134e+06	1.58273e+06	1.8781e+06	7.04028e+06	8.61547e+08	3.80975e+06	5.51507e+06	5.74743e+08	2.52837e+06	4.15475e+08	3.24991e+08	3.48841e+06	4.75353e+08	2.73968e+08	6.64279e+06	8.27007e+08	1.28905e+06	2.15607e+06	2.62467e+06	6.62085e+08	5.39762e+08	2.58833e+06	8.15012e+08	1.1448e+06	3.84106e+06	2.02185e+06	1.47487e+06	3.88099e+06	1.1263e+06	2.65661e+06	5.11888e+08	5.06033e+08	6.79832e+08
	Checked	Structure	Name	Formula	Molecular Weight	CSID	# References
FALSE		C17 H35 N O2	Full match	No results		285.266	12.176	8.52621e+08	0	No MS2	425147	27782.7	463071	1.67988e+07	1.94597e+07	6.56496e+06	558068	4.55478e+06	373872	1.28921e+06	1.17692e+08	499863	4.10558e+06	2.05195e+08	414552	1.28489e+07	9.97157e+06	559896	3.80148e+07	1.81721e+07	1.5874e+06	1.06455e+08	1.05213e+07	591974	461078	1.67638e+07	1.5764e+07	1.57902e+07	8.52621e+08	874778	535206	571812	2.78128e+06	6.48637e+06	632304	404709	1.48578e+07	1.58588e+07	1.2622e+08
	Checked	Structure	Name	Formula	Molecular Weight	CSID	# References
FALSE	Thymine	C5 H6 N2 O2	Full match	Full match		126.043	2.849	8.43372e+08	3	No MS2	889385	19155	21795	4.51513e+08	4.55123e+08	2.00622e+07	1.67641e+07	7.82555e+07	3.68086e+07	1.9217e+07	6.38234e+08	4.5189e+07	5.30593e+07	5.22257e+08	1.04285e+06	2.87103e+08	2.7573e+08	1.9446e+07	5.84098e+08	1.69443e+08	3.40151e+08	6.93835e+08	5.28897e+08	2.06406e+08	1.09823e+06	3.54882e+08	3.46961e+08	6.06688e+07	6.05593e+08	2.11732e+08	4.58877e+07	1.22114e+07	1.08389e+07	1.34906e+08	7.49147e+07	1.18226e+06	3.16144e+08	3.29616e+08	5.65315e+08
	Checked	Structure	Name	Formula	Molecular Weight	CSID	# References
	FALSE	# ACD/Labs04281710402D 9 9 0 0 0 0 0 0 0 0 1 V2000 2.3117 0.0000 0.0000 O 0 0 0 0 0 0 0 0 0 0 0 0 0.0000 -3.9880 0.0000 O 0 0 0 0 0 0 0 0 0 0 0 0 1.1605 -1.9894 0.0000 N 0 0 0 0 0 0 0 0 0 0 0 0 2.2979 -3.9972 0.0000 N 0 0 0 0 0 0 0 0 0 0 0 0 2.3117 -1.3309 0.0000 C 0 0 0 0 0 0 0 0 0 0 0 0 3.4538 -1.9986 0.0000 C 0 0 0 0 0 0 0 0 0 0 0 0 1.1605 -3.3248 0.0000 C 0 0 0 0 0 0 0 0 0 0 0 0 3.4538 -3.334…	Thymine	C5 H6 N2 O2	126.043	1103	4404
	FALSE	# ACD/Labs04281711282D 9 9 0 0 0 0 0 0 0 0 1 V2000 3.3870 -4.9590 0.0000 O 0 0 0 0 0 0 0 0 0 0 0 0 2.9754 -3.6945 0.0000 C 0 0 0 0 0 0 0 0 0 0 0 0 3.8681 -2.7076 0.0000 O 0 0 0 0 0 0 0 0 0 0 0 0 1.6762 -3.4168 0.0000 C 0 0 0 0 0 0 0 0 0 0 0 0 1.2646 -2.1522 0.0000 C 0 0 0 0 0 0 0 0 0 0 0 0 2.0481 -1.0761 0.0000 C 0 0 0 0 0 0 0 0 0 0 0 0 1.2646 0.0000 0.0000 N 0 0 0 0 0 0 0 0 0 0 0 0 0.0000 -0.411…	Imidazole-4-acetate	C5 H6 N2 O2	126.043	86856	238
	FALSE	# ACD/Labs04281713402D 9 9 0 0 0 0 0 0 0 0 1 V2000 0.0000 0.0000 0.0000 O 0 0 0 0 0 0 0 0 0 0 0 0 1.1515 -0.6620 0.0000 C 0 0 0 0 0 0 0 0 0 0 0 0 1.1515 -1.9915 0.0000 O 0 0 0 0 0 0 0 0 0 0 0 0 2.3030 0.0000 0.0000 C 0 0 0 0 0 0 0 0 0 0 0 0 3.4545 -0.6620 0.0000 N 0 0 0 0 0 0 0 0 0 0 0 0 4.6672 -0.1224 0.0000 C 0 0 0 0 0 0 0 0 0 0 0 0 5.5628 -1.1126 0.0000 N 0 0 0 0 0 0 0 0 0 0 0 0 4.8953 -2.2641…	NI3378200	C5 H6 N2 O2	126.043	570527	229
FALSE	Leu-Leu	C12 H24 N2 O3	Full match	Full match		244.178	8.236	8.39404e+08	5	No MS2	498463	27231.1	171631	2.49557e+08	2.68079e+08	4.78074e+08	1.35071e+08	2.10034e+08	2.66149e+08	3.52176e+08	5.1257e+08	2.2014e+08	4.29012e+08	3.53736e+08	288939	1.92782e+08	1.90403e+08	3.15613e+08	4.72462e+08	3.59206e+08	2.38471e+08	4.71066e+08	5.85822e+06	3.36728e+08	333118	2.78093e+08	2.675e+08	3.56553e+08	5.74209e+08	2.43075e+07	3.42961e+08	2.44147e+08	2.16148e+08	2.07229e+08	5.38342e+07	320348	2.55141e+08	2.4034e+08	6.58035e+08
	Checked	Structure	Name	Formula	Molecular Weight	CSID	# References
	FALSE	# ACD/Labs04221415492D 17 16 0 0 0 0 0 0 0 0 1 V2000 2.3666 -5.3194 0.0000 O 0 0 0 0 0 0 0 0 0 0 0 0 5.7590 -2.0076 0.0000 O 0 0 0 0 0 0 0 0 0 0 0 0 6.9240 -3.9932 0.0000 O 0 0 0 0 0 0 0 0 0 0 0 0 3.4584 -3.3338 0.0000 N 0 0 0 0 0 0 0 0 0 0 0 0 0.0000 -3.9932 0.0000 N 0 0 0 0 0 0 0 0 0 0 0 0 4.6160 -4.0006 0.0000 C 0 0 0 0 0 0 0 0 0 0 0 0 2.3080 -3.9932 0.0000 C 0 0 0 0 0 0 0 0 0 0 0 0 1.1503 -3.…	Leu-Leu	C12 H24 N2 O3	244.179	85053	73
	FALSE	# ACD/Labs04221415492D 17 16 0 0 0 0 0 0 0 0 1 V2000 6.9367 -3.3393 0.0000 O 0 0 0 0 0 0 0 0 0 0 0 0 15.0026 0.0000 0.0000 O 0 0 0 0 0 0 0 0 0 0 0 0 16.1318 -2.0003 0.0000 O 0 0 0 0 0 0 0 0 0 0 0 0 8.0659 -1.3389 0.0000 N 0 0 0 0 0 0 0 0 0 0 0 0 0.0000 -2.0003 0.0000 N 0 0 0 0 0 0 0 0 0 0 0 0 6.9367 -2.0003 0.0000 C 0 0 0 0 0 0 0 0 0 0 0 0 5.7268 -1.3389 0.0000 C 0 0 0 0 0 0 0 0 0 0 0 0 9.1951 -2…	6-[(6-Aminohexanoyl)amino]hexanoic acid	C12 H24 N2 O3	244.179	871	40
	FALSE	#435718 -OEChem-02070708252D 41 40 0 1 0 0 0 0 0999 V2000 6.3301 -1.4400 0.0000 O 0 0 0 0 0 0 0 0 0 0 0 0 3.7321 -1.9400 0.0000 O 0 0 0 0 0 0 0 0 0 0 0 0 5.4641 -1.9400 0.0000 O 0 0 0 0 0 0 0 0 0 0 0 0 5.4641 0.0600 0.0000 N 0 0 0 0 0 0 0 0 0 0 0 0 8.0622 -0.4400 0.0000 N 0 0 0 0 0 0 0 0 0 0 0 0 3.7321 0.0600 0.0000 C 0 0 3 0 0 0 0 0 0 0 0 0 4.5981 -0.4400 0.0000 C 0 0 3 0 0 0 0 0 0 0 0 0 7.1962 …	leu-ile	C12 H24 N2 O3	244.179	385345	10
	FALSE	# ACD/Labs01300718572D 17 16 0 0 0 0 0 0 0 0 2 V2000 4.6340 -3.4477 0.0000 C 0 0 0 0 0 0 0 0 0 0 0 0 3.9732 -2.2931 0.0000 N 0 0 0 0 0 0 0 0 0 0 0 0 2.6514 -2.3091 0.0000 C 0 0 0 0 0 0 0 0 0 0 0 0 1.9906 -3.4477 0.0000 C 0 0 0 0 0 0 0 0 0 0 0 0 5.9637 -3.4477 0.0000 C 0 0 0 0 0 0 0 0 0 0 0 0 6.6405 -4.6022 0.0000 N 0 3 0 0 0 0 0 0 0 0 0 0 3.9732 -4.5942 0.0000 O 0 0 0 0 0 0 0 0 0 0 0 0 0.6529 -3.…	Ile-Ile	C12 H24 N2 O3	244.179	10439627	9
	FALSE	# ACD/Labs05010700192D 17 16 0 0 0 0 0 0 0 0 1 V2000 2.5048 -6.5060 0.0000 C 0 0 0 0 0 0 0 0 0 0 0 0 3.7540 -6.5060 0.0000 C 0 0 0 0 0 0 0 0 0 0 0 0 4.3851 -5.4195 0.0000 C 0 0 0 0 0 0 0 0 0 0 0 0 5.6342 -5.4195 0.0000 C 0 0 0 0 0 0 0 0 0 0 0 0 3.7540 -4.3395 0.0000 C 0 0 0 0 0 0 0 0 0 0 0 0 4.3851 -3.2530 0.0000 C 0 0 0 0 0 0 0 0 0 0 0 0 5.6342 -3.2530 0.0000 O 0 0 0 0 0 0 0 0 0 0 0 0 3.7540 -2.…	ile-leu	C12 H24 N2 O3	244.179	14526373	7
FALSE			No results	No results		142.952	9.714	8.32425e+08	0	No MS2	2.8443e+06	118490	8.32425e+08	2.64454e+06	2.66981e+06	2.74873e+06	4.69231e+06	2.33757e+06	1.86652e+06	5.73134e+06	3.45999e+06	2.22267e+06	2.66746e+06	2.44069e+06	961875	2.11464e+06	2.54783e+06	2.46839e+06	3.00212e+06	2.19537e+06	2.91162e+06	2.73941e+06	2.36873e+06	2.47737e+06	1.10377e+06	2.39002e+06	2.44542e+06	3.09771e+06	3.50365e+06	3.13637e+06	2.22089e+06	2.11443e+06	5.02639e+06	2.69694e+06	2.05518e+06	1.01076e+06	2.44788e+06	2.44723e+06	3.00717e+06
	Checked	Structure	Name	Formula	Molecular Weight	CSID	# References
FALSE	7alpha-Hydroxy-3-oxochol-4-en-24-oic acid	C24 H36 O4	Full match	Full match		388.26	11.638	8.30906e+08	3	No MS2	184002	12167.5	177002	4.66655e+08	4.23217e+08	6.93398e+08	5.64898e+06	3.82161e+08	2.80174e+08	2.10745e+07	5.58921e+08	4.12601e+08	4.3146e+08	3.70021e+08	164940	3.3874e+08	3.18547e+08	1.21932e+08	8.30906e+08	5.17911e+08	3.77877e+08	6.92923e+08	189887	5.02772e+08	185744	3.51564e+08	3.68009e+08	7.00358e+08	7.00364e+08	3.49162e+06	5.91284e+08	1.32767e+08	5.98413e+06	7.2445e+08	183658	165720	4.13368e+08	4.52494e+08	4.73899e+08
	Checked	Structure	Name	Formula	Molecular Weight	CSID	# References
	FALSE	#193493 -OEChem-02070708202D 64 67 0 1 0 0 0 0 0999 V2000 7.4149 -3.0540 0.0000 O 0 0 0 0 0 0 0 0 0 0 0 0 2.0000 -3.0749 0.0000 O 0 0 0 0 0 0 0 0 0 0 0 0 11.2283 3.5461 0.0000 O 0 0 0 0 0 0 0 0 0 0 0 0 11.5855 1.8513 0.0000 O 0 0 0 0 0 0 0 0 0 0 0 0 7.3931 -0.0226 0.0000 C 0 0 1 0 0 0 0 0 0 0 0 0 7.3931 -1.0226 0.0000 C 0 0 2 0 0 0 0 0 0 0 0 0 6.5271 -1.5226 0.0000 C 0 0 1 0 0 0 0 0 0 0 0 0 5.661…	7alpha-Hydroxy-3-oxochol-4-en-24-oic acid	C24 H36 O4	388.261	167908	20
	FALSE	# ACD/Labs04281710592D 32 35 0 0 1 0 0 0 0 0 1 V2000 11.2636 -1.9602 0.0000 O 0 0 0 0 0 0 0 0 0 0 0 0 3.3645 -7.7675 0.0000 O 0 0 0 0 0 0 0 0 0 0 0 0 12.3754 0.0000 0.0000 O 0 0 0 0 0 0 0 0 0 0 0 0 2.2381 -5.8220 0.0000 O 0 0 0 0 0 0 0 0 0 0 0 0 8.9817 -5.8366 0.0000 C 0 0 0 0 0 0 0 0 0 0 0 0 10.1519 -5.1784 0.0000 C 0 0 0 0 0 0 0 0 0 0 0 0 7.8699 -5.1637 0.0000 C 0 0 0 0 0 0 0 0 0 0 0 0 10.1227 …	Bolandiol dipropionate	C24 H36 O4	388.261	392020	18
	FALSE	# SciTegic04031415222D 28 27 0 0 0 0 0 0 0 0999 V2000 0.0000 -1.3349 0.0000 O 0 0 0 0 0 0 0 0 0 0 0 0 1.1650 -1.9902 0.0000 C 0 0 0 0 0 0 0 0 0 0 0 0 2.3057 -1.3349 0.0000 C 0 0 0 0 0 0 0 0 0 0 0 0 3.4707 -1.9902 0.0000 C 0 0 0 0 0 0 0 0 0 0 0 0 4.6114 -1.3349 0.0000 C 0 0 0 0 0 0 0 0 0 0 0 0 5.7764 -1.9902 0.0000 C 0 0 0 0 0 0 0 0 0 0 0 0 6.9414 -1.3349 0.0000 C 0 0 0 0 0 0 0 0 0 0 0 0 8.0821 -1…	(2E,6E,10E,14E)-3,7,11,15-Tetramethyl-16-oxo-2,6,10,14-hexadecatetraen-1-yl (2E)-3-hydroxy-2-methylacrylate	C24 H36 O4	388.261	30776829	4
FALSE	Prostan-1-oicacid, 9,11,15-trihydroxy-, (9a,11a,15S)-	C20 H38 O5	Full match	Full match		358.271	13.521	8.30825e+08	1	No MS2	159156	14959.6	146605	3.75231e+08	4.07475e+08	261968	2.26244e+06	194497	266160	2.38923e+06	8.30825e+08	795831	1.30559e+06	6.25639e+08	186155	2.30022e+08	1.79666e+08	542835	2.77773e+08	7.7265e+07	1.19505e+06	7.49763e+08	219170	514725	262068	3.50465e+08	3.25985e+08	242469	7.95067e+08	245644	905707	785590	247120	375825	204271	271633	3.3678e+08	3.55487e+08	6.5585e+08
	Checked	Structure	Name	Formula	Molecular Weight	CSID	# References
	FALSE	#5311239 -OEChem-02070710132D 63 63 0 1 0 0 0 0 0999 V2000 11.9356 -1.8216 0.0000 O 0 0 0 0 0 0 0 0 0 0 0 0 9.0877 -3.8907 0.0000 O 0 0 0 0 0 0 0 0 0 0 0 0 10.1755 1.4571 0.0000 O 0 0 0 0 0 0 0 0 0 0 0 0 2.5897 -3.5711 0.0000 O 0 0 0 0 0 0 0 0 0 0 0 0 3.1249 -1.9238 0.0000 O 0 0 0 0 0 0 0 0 0 0 0 0 10.1755 -1.5429 0.0000 C 0 0 2 0 0 0 0 0 0 0 0 0 9.3665 -2.1307 0.0000 C 0 0 2 0 0 0 0 0 0 0 0 0 10…	Prostan-1-oicacid, 9,11,15-trihydroxy-, (9a,11a,15S)-	C20 H38 O5	358.272	4470758	31
FALSE	Aceclidine	C9 H15 N O2	Full match	Full match		169.11	9.569	8.25674e+08	3	No MS2	212986	11918.3	35030.3	2.2519e+08	2.18852e+08	2.46631e+08	1.2238e+08	2.03781e+08	1.28301e+08	1.53723e+08	2.81449e+08	1.86115e+08	1.95586e+08	1.7942e+08	1.13502e+06	1.90131e+08	1.82212e+08	1.8281e+08	8.25674e+08	1.84834e+08	2.18481e+08	1.82237e+08	1.85392e+08	2.10885e+08	1.10346e+06	1.98526e+08	2.02137e+08	2.51816e+08	3.06959e+08	1.89076e+08	1.46832e+08	1.48695e+08	1.9057e+08	1.98198e+08	1.62251e+08	1.19359e+06	2.0571e+08	2.12227e+08	2.67928e+08
	Checked	Structure	Name	Formula	Molecular Weight	CSID	# References
	FALSE	# ACD/Labs06251410062D 12 13 0 0 0 0 0 0 0 0 1 V2000 4.8323 -2.0659 0.0000 C 0 0 0 0 0 0 0 0 0 0 0 0 4.8383 -0.7365 0.0000 C 0 0 0 0 0 0 0 0 0 0 0 0 5.9880 -0.0719 0.0000 O 0 0 0 0 0 0 0 0 0 0 0 0 3.6886 -0.0659 0.0000 O 0 0 0 0 0 0 0 0 0 0 0 0 2.5329 -0.7305 0.0000 C 0 0 0 0 0 0 0 0 0 0 0 0 2.5329 -2.1916 0.0000 C 0 0 0 0 0 0 0 0 0 0 0 0 1.2575 -2.9221 0.0000 N 0 0 0 0 0 0 0 0 0 0 0 0 0.0000 -2.…	Aceclidine	C9 H15 N O2	169.11	1902	224
	FALSE	#34167 -OEChem-02070708202D 27 27 0 1 0 0 0 0 0999 V2000 2.8660 1.2500 0.0000 O 0 0 0 0 0 0 0 0 0 0 0 0 2.0000 -0.2500 0.0000 O 0 0 0 0 0 0 0 0 0 0 0 0 4.5981 -1.7500 0.0000 N 0 0 3 0 0 0 0 0 0 0 0 0 5.4641 -1.2500 0.0000 C 0 0 0 0 0 0 0 0 0 0 0 0 3.7321 -1.2500 0.0000 C 0 0 0 0 0 0 0 0 0 0 0 0 5.4641 -0.2500 0.0000 C 0 0 0 0 0 0 0 0 0 0 0 0 3.7321 -0.2500 0.0000 C 0 0 0 0 0 0 0 0 0 0 0 0 4.5981 …	Ethyl 1-methyl-1,2,5,6-tetrahydro-3-pyridinecarboxylate	C9 H15 N O2	169.11	31488	66
	FALSE	# ACD/Labs04281710332D 12 12 0 0 0 0 0 0 0 0 1 V2000 1.1356 -3.9952 0.0000 O 0 0 0 0 0 0 0 0 0 0 0 0 3.4435 0.0000 0.0000 O 0 0 0 0 0 0 0 0 0 0 0 0 3.4435 -3.9952 0.0000 N 0 0 0 0 0 0 0 0 0 0 0 0 2.2895 -1.9953 0.0000 C 0 0 0 0 0 0 0 0 0 0 0 0 2.2895 -3.3285 0.0000 C 0 0 0 0 0 0 0 0 0 0 0 0 3.4435 -1.3332 0.0000 C 0 0 0 0 0 0 0 0 0 0 0 0 1.1356 -1.3332 0.0000 C 0 0 0 0 0 0 0 0 0 0 0 0 2.2895 -0.6…	Piperidione	C9 H15 N O2	169.11	6222	55
FALSE	Fasoracetam	C10 H16 N2 O2	Full match	Full match		196.121	8.321	8.12719e+08	3	No MS2	442889	11656.7	14036	1.80795e+08	1.77549e+08	1.61253e+08	8.54409e+07	1.16316e+08	9.98786e+07	1.45093e+08	1.34041e+08	1.06987e+08	1.39033e+08	1.40704e+08	178353	1.4721e+08	1.41153e+08	9.46147e+07	3.99463e+08	1.28847e+08	1.71986e+08	1.65259e+08	2.07573e+08	1.65747e+08	130035	1.79799e+08	1.67329e+08	1.74633e+08	1.7736e+08	632153	1.07789e+08	1.05746e+08	1.21792e+08	1.47533e+08	1.48695e+08	536449	1.64368e+08	1.60132e+08	1.19255e+08
	Checked	Structure	Name	Formula	Molecular Weight	CSID	# References
	FALSE	# ACD/Labs04281711212D 14 15 0 0 1 0 0 0 0 0 1 V2000 3.4508 0.0000 0.0000 O 0 0 0 0 0 0 0 0 0 0 0 0 6.5733 -4.8178 0.0000 O 0 0 0 0 0 0 0 0 0 0 0 0 2.3050 -1.9901 0.0000 N 0 0 0 0 0 0 0 0 0 0 0 0 4.7373 -3.3235 0.0000 N 0 0 0 0 0 0 0 0 0 0 0 0 4.5966 -1.9968 0.0000 C 0 0 0 0 0 0 0 0 0 0 0 0 3.4441 -1.3334 0.0000 C 0 0 0 0 0 0 0 0 0 0 0 0 6.0373 -3.6049 0.0000 C 0 0 0 0 0 0 0 0 0 0 0 0 5.8161 -1.4…	Fasoracetam	C10 H16 N2 O2	196.121	171980	54
	FALSE	# ACD/Labs12220922332D 14 14 0 0 0 0 0 0 0 0 1 V2000 3.4514 0.0000 0.0000 N 0 0 0 0 0 0 0 0 0 0 0 0 3.4514 -2.6645 0.0000 N 0 0 0 0 0 0 0 0 0 0 0 0 4.6042 -0.6696 0.0000 C 0 0 0 0 0 0 0 0 0 0 0 0 4.6042 -2.0018 0.0000 C 0 0 0 0 0 0 0 0 0 0 0 0 2.2987 -0.6696 0.0000 C 0 0 0 0 0 0 0 0 0 0 0 0 2.2987 -2.0018 0.0000 C 0 0 0 0 0 0 0 0 0 0 0 0 5.7501 -2.6645 0.0000 C 0 0 0 0 0 0 0 0 0 0 0 0 5.7501 0.00…	2-Isopropyl-3,5-dimethoxy-6-methylpyrazine	C10 H16 N2 O2	196.121	23183493	8
	FALSE	# ACD/Labs04270709572D 14 14 0 0 0 0 0 0 0 0 1 V2000 8.1345 -5.1108 0.0000 C 0 0 0 0 0 0 0 0 0 0 0 0 8.9194 -4.0315 0.0000 C 0 0 0 0 0 0 0 0 0 0 0 0 8.1345 -2.9612 0.0000 C 0 0 0 0 0 0 0 0 0 0 0 0 6.8768 -3.3715 0.0000 N 0 0 0 0 0 0 0 0 0 0 0 0 6.8768 -4.7005 0.0000 C 0 0 0 0 0 0 0 0 0 0 0 0 5.7976 -2.5866 0.0000 C 0 0 0 0 0 0 0 0 0 0 0 0 4.5845 -3.1307 0.0000 C 0 0 0 0 0 0 0 0 0 0 0 0 3.5053 -2.…	6-(1H-Pyrrol-1-yl)norleucine	C10 H16 N2 O2	196.121	13670018	5
FALSE	8-Hydroxyhexadecanedioic acid	C16 H30 O5	Full match	Full match		302.209	12.914	8.10119e+08	2	No MS2	955235	105480	1.01181e+06	1.40082e+08	1.49579e+08	2.88419e+06	1.36506e+06	1.88392e+06	1.28635e+06	1.99775e+06	7.91764e+08	1.75051e+06	1.95938e+06	5.45311e+08	1.43376e+06	9.25944e+07	7.32466e+07	1.85595e+06	1.13019e+08	4.68452e+07	3.17276e+06	8.10119e+08	1.56303e+06	2.4117e+06	1.66828e+06	1.40078e+08	1.3011e+08	2.74721e+06	6.50007e+08	1.69602e+06	2.28348e+06	1.52222e+06	1.69774e+06	2.9569e+06	1.70632e+06	1.54495e+06	1.20905e+08	1.17861e+08	6.78988e+08
	Checked	Structure	Name	Formula	Molecular Weight	CSID	# References
	FALSE	#16061042 -OEChem-09010708452D 51 50 0 1 0 0 0 0 0999 V2000 10.3312 -1.0950 0.0000 O 0 0 0 0 0 0 0 0 0 0 0 0 17.2594 -0.0950 0.0000 O 0 0 0 0 0 0 0 0 0 0 0 0 2.5369 0.4050 0.0000 O 0 0 0 0 0 0 0 0 0 0 0 0 16.3933 1.4050 0.0000 O 0 0 0 0 0 0 0 0 0 0 0 0 3.4030 -1.0950 0.0000 O 0 0 0 0 0 0 0 0 0 0 0 0 10.3312 -0.0950 0.0000 C 0 0 3 0 0 0 0 0 0 0 0 0 9.4651 0.4050 0.0000 C 0 0 0 0 0 0 0 0 0 0 0 0 11…	8-Hydroxyhexadecanedioic acid	C16 H30 O5	302.209	17220725	7
	FALSE	# Marvin 02051123412D 21 20 0 0 0 0 0 0 0 0999 V2000 14.3783 4.1763 0.0000 O 0 0 0 0 0 0 0 0 0 0 0 0 14.3783 5.0013 0.0000 C 0 0 0 0 0 0 0 0 0 0 0 0 13.6638 5.4138 0.0000 C 0 0 0 0 0 0 0 0 0 0 0 0 12.9493 5.0013 0.0000 C 0 0 0 0 0 0 0 0 0 0 0 0 12.2349 5.4138 0.0000 C 0 0 0 0 0 0 0 0 0 0 0 0 11.5204 5.0013 0.0000 C 0 0 0 0 0 0 0 0 0 0 0 0 10.8059 5.4138 0.0000 C 0 0 0 0 0 0 0 0 0 0 0 0 10.0914 5.…	7-Hydroxyhexadecanedioic acid	C16 H30 O5	302.209	24822049	6
FALSE			No results	No results		97.9753	0.88	8.05714e+08	0	No MS2	28064	24256.7	241716	5.47372e+07	3.70503e+07	2.30752e+07	2.46734e+07	3.51902e+07	4.20343e+07	2.20005e+07	3.15056e+07	4.454e+07	4.22889e+07	2.89102e+07	1.73605e+06	5.42591e+07	6.02864e+07	2.05326e+07	7.31756e+07	3.72296e+07	2.06228e+07	3.65859e+07	1.09175e+08	2.31014e+07	3.15704e+06	6.20233e+07	4.48787e+07	3.066e+07	4.21792e+07	8.05714e+08	2.79475e+07	3.44256e+07	2.76718e+07	2.31429e+07	4.63055e+07	2.02793e+06	4.6056e+07	5.97454e+07	4.46496e+07
	Checked	Structure	Name	Formula	Molecular Weight	CSID	# References
FALSE	VS1150000	C18 H34 O4	Full match	Full match		314.245	12.436	8.04788e+08	7	No MS2	1.28569e+06	105384	1.08307e+06	9.72229e+07	1.50764e+08	8.83838e+07	3.77307e+08	5.78612e+07	7.61889e+07	2.09206e+08	6.41441e+08	4.16192e+07	1.14927e+08	5.01672e+08	1.50349e+06	1.20706e+08	1.0603e+08	7.68462e+07	1.31094e+08	8.00512e+07	5.99924e+07	8.04788e+08	2.23277e+07	6.85022e+07	1.62047e+06	1.45051e+08	1.84014e+08	1.13233e+08	4.7111e+08	9.43911e+06	5.28389e+07	5.09069e+07	3.91512e+08	7.16287e+07	1.87279e+07	1.5668e+06	1.78265e+08	2.23728e+08	6.49049e+08
	Checked	Structure	Name	Formula	Molecular Weight	CSID	# References
	FALSE	# ACD/Labs04281710562D 22 21 0 0 0 0 0 0 0 0 1 V2000 3.9927 -8.0819 0.0000 O 0 0 0 0 0 0 0 0 0 0 0 0 15.2959 -2.3146 0.0000 O 0 0 0 0 0 0 0 0 0 0 0 0 5.9795 -9.2200 0.0000 O 0 0 0 0 0 0 0 0 0 0 0 0 13.3092 -1.1573 0.0000 O 0 0 0 0 0 0 0 0 0 0 0 0 5.3237 -8.0819 0.0000 C 0 0 0 0 0 0 0 0 0 0 0 0 13.9650 -2.3146 0.0000 C 0 0 0 0 0 0 0 0 0 0 0 0 5.9795 -6.9246 0.0000 C 0 0 0 0 0 0 0 0 0 0 0 0 13.3092…	VS1150000	C18 H34 O4	314.246	13837584	178
	FALSE	# ACD/Labs04281712472D 22 21 0 0 0 0 0 0 0 0 1 V2000 0.0000 -20.7766 0.0000 O 0 0 0 0 0 0 0 0 0 0 0 0 1.3383 -20.7766 0.0000 C 0 0 0 0 0 0 0 0 0 0 0 0 1.9965 -21.9394 0.0000 O 0 0 0 0 0 0 0 0 0 0 0 0 1.9965 -19.6358 0.0000 C 0 0 0 0 0 0 0 0 0 0 0 0 1.3383 -18.4730 0.0000 C 0 0 0 0 0 0 0 0 0 0 0 0 1.9965 -17.3102 0.0000 C 0 0 0 0 0 0 0 0 0 0 0 0 1.3383 -16.1693 0.0000 C 0 0 0 0 0 0 0 0 0 0 0 0 1.9…	Octadecanedioic acid	C18 H34 O4	314.246	63283	116
	FALSE	# ACD/Labs04221415492D 22 21 0 0 0 0 0 0 0 0 1 V2000 13.3340 -2.3288 0.0000 O 0 0 0 0 0 0 0 0 0 0 0 0 15.3124 -2.3288 0.0000 O 0 0 0 0 0 0 0 0 0 0 0 0 1.0923 -1.9372 0.0000 O 0 0 0 0 0 0 0 0 0 0 0 0 0.0000 0.0000 0.0000 O 0 0 0 0 0 0 0 0 0 0 0 0 13.6843 -0.7213 0.0000 C 0 0 0 0 0 0 0 0 0 0 0 0 14.9621 -0.7213 0.0000 C 0 0 0 0 0 0 0 0 0 0 0 0 12.5714 -0.0618 0.0000 C 0 0 0 0 0 0 0 0 0 0 0 0 16.075…	12,13-DiHOME	C18 H34 O4	314.246	8412123	28
	FALSE	# ACD/Labs04221415492D 22 22 0 0 0 0 0 0 0 0 1 V2000 10.8436 -0.1735 0.0000 O 0 0 0 0 0 0 0 0 0 0 0 0 1.1061 0.0000 0.0000 O 0 0 0 0 0 0 0 0 0 0 0 0 0.0000 -2.0169 0.0000 O 0 0 0 0 0 0 0 0 0 0 0 0 21.6873 -1.8868 0.0000 O 0 0 0 0 0 0 0 0 0 0 0 0 10.1930 -1.3012 0.0000 C 0 0 0 0 0 0 0 0 0 0 0 0 11.4943 -1.3012 0.0000 C 0 0 0 0 0 0 0 0 0 0 0 0 9.0219 -2.0169 0.0000 C 0 0 0 0 0 0 0 0 0 0 0 0 12.6220…	9,10-epoxy-18-hydroxyoctadecanoic acid	C18 H34 O4	314.246	7994062	24
	FALSE	#5282958 -OEChem-02070710102D 56 55 0 1 0 0 0 0 0999 V2000 9.7942 1.2500 0.0000 O 0 0 0 0 0 0 0 0 0 0 0 0 8.9282 -1.2500 0.0000 O 0 0 0 0 0 0 0 0 0 0 0 0 17.5885 -0.2500 0.0000 O 0 0 0 0 0 0 0 0 0 0 0 0 16.7224 1.2500 0.0000 O 0 0 0 0 0 0 0 0 0 0 0 0 10.6603 -0.2500 0.0000 C 0 0 0 0 0 0 0 0 0 0 0 0 11.5263 0.2500 0.0000 C 0 0 0 0 0 0 0 0 0 0 0 0 9.7942 0.2500 0.0000 C 0 0 3 0 0 0 0 0 0 0 0 0 12.3…	(12E)-9,10-Dihydroxy-12-octadecenoic acid	C18 H34 O4	314.246	4446085	23
	FALSE	# ACD/Labs04221415492D 22 21 0 0 0 0 0 0 0 0 1 V2000 9.6975 -2.3119 0.0000 O 0 0 0 0 0 0 0 0 0 0 0 0 11.6207 -2.3323 0.0000 O 0 0 0 0 0 0 0 0 0 0 0 0 1.0843 -1.9436 0.0000 O 0 0 0 0 0 0 0 0 0 0 0 0 0.0000 0.0000 0.0000 O 0 0 0 0 0 0 0 0 0 0 0 0 10.0453 -0.6547 0.0000 C 0 0 0 0 0 0 0 0 0 0 0 0 11.3138 -0.6547 0.0000 C 0 0 0 0 0 0 0 0 0 0 0 0 8.8792 0.0000 0.0000 C 0 0 0 0 0 0 0 0 0 0 0 0 12.4799 -…	9,10-DiHOME	C18 H34 O4	314.246	8142232	22
	FALSE	# ACD/Labs04221415492D 22 21 0 0 1 0 0 0 0 0 1 V2000 8.0397 0.0000 0.0000 O 0 0 0 0 0 0 0 0 0 0 0 0 9.2092 -3.3203 0.0000 O 0 0 0 0 0 0 0 0 0 0 0 0 1.1485 -0.0209 0.0000 O 0 0 0 0 0 0 0 0 0 0 0 0 0.0000 -2.0256 0.0000 O 0 0 0 0 0 0 0 0 0 0 0 0 8.0397 -1.3365 0.0000 C 0 0 0 0 0 0 0 0 0 0 0 0 9.1883 -1.9838 0.0000 C 0 0 0 0 0 0 0 0 0 0 0 0 6.8912 -2.0047 0.0000 C 0 0 0 0 0 0 0 0 0 0 0 0 10.3577 -1.…	(Z)-(7S,8S)-Dihydroxyoctadeca-9-enoate	C18 H34 O4	314.246	4444498	5
FALSE			No results	No results		138.03	10.82	8.01959e+08	0	No MS2	126907	15291.5	106584	4.42195e+07	4.45225e+07	7.19146e+06	1.21172e+06	4.44216e+06	3.02745e+06	1.97866e+06	3.50985e+08	3.68413e+06	5.3453e+06	2.31902e+08	218685	4.08649e+07	3.51258e+07	3.25125e+06	3.56428e+07	3.21918e+07	6.25976e+06	3.03701e+08	4.7476e+06	4.5765e+06	250208	4.02845e+07	4.18922e+07	5.31663e+06	2.88859e+08	374955	4.06375e+06	2.04875e+06	1.92308e+06	7.25268e+06	7.05442e+06	242463	3.83771e+07	4.10496e+07	2.69217e+08
	Checked	Structure	Name	Formula	Molecular Weight	CSID	# References
FALSE			No results	No results		299.301	11.91	7.98662e+08	0	No MS2	185774	11541.5	171639	5.91113e+07	5.77147e+07	334585	422685	260847	159147	759076	7.98662e+08	204173	435530	4.85599e+08	264036	4.27286e+07	3.34399e+07	272080	3.43564e+07	1.10481e+07	625408	5.37718e+08	181264	193483	417049	5.4743e+07	4.97507e+07	225117	4.74564e+08	216741	190637	156517	166796	239019	201608	254566	5.43979e+07	4.83777e+07	6.08531e+08
	Checked	Structure	Name	Formula	Molecular Weight	CSID	# References
FALSE		C18 H33 N O2	Full match	No results		295.25	13.475	7.91039e+08	0	No MS2	558647	51099	549711	2.61599e+08	3.00021e+08	2.01958e+08	1.63423e+08	1.03877e+08	7.14415e+07	2.19555e+08	7.91039e+08	5.25831e+07	1.30301e+08	3.44754e+08	1.02508e+06	1.15141e+08	9.75798e+07	2.17628e+08	5.36653e+08	2.18153e+08	3.2756e+08	3.98981e+08	9.20095e+07	8.63912e+07	2.16778e+06	1.65822e+08	1.79343e+08	1.90592e+08	5.46504e+08	2.02631e+08	1.62502e+08	1.16903e+08	2.4965e+08	2.84023e+08	1.25394e+08	1.5803e+06	1.53857e+08	1.5458e+08	3.1293e+08
	Checked	Structure	Name	Formula	Molecular Weight	CSID	# References
FALSE		C23 H45 N5 O8	Full match	No results		519.324	10.046	7.90962e+08	0	No MS2	243279	13883.6	852200	363716	450511	241313	3.95514e+08	186406	9.14777e+07	7.07536e+08	1.99001e+06	171474	209176	1.01639e+06	114560	242165	218292	2.17552e+08	348908	177015	261044	3.62062e+06	481661	203795	141881	401291	397599	222650	2.31692e+06	6.79975e+07	186848	1.07975e+08	5.13792e+08	257265	5.04736e+06	123378	398542	303642	2.15713e+06
	Checked	Structure	Name	Formula	Molecular Weight	CSID	# References
FALSE			No results	No results		177.942	1.046	7.9081e+08	0	No MS2	36873.7	31801.8	313277	2.59321e+06	2.14154e+06	1.29045e+06	957108	1.8091e+06	831368	843704	2.18045e+06	1.86876e+06	1.19771e+06	1.28294e+06	333594	2.15303e+06	2.22298e+06	868497	1.8346e+06	1.65145e+06	1.16879e+06	1.99104e+06	3.58904e+06	1.39777e+06	377291	2.97951e+06	2.24221e+06	1.49826e+06	1.68142e+06	7.9081e+08	1.38354e+06	796025	1.55747e+06	1.78633e+06	6.74761e+06	359266	2.70067e+06	2.07037e+06	2.65447e+06
	Checked	Structure	Name	Formula	Molecular Weight	CSID	# References
FALSE			No results	No results		85.0896	0.858	7.886e+08	0	No MS2	37714.3	40354.7	43511.3	3.81186e+08	2.66081e+08	3.42297e+08	3.78588e+06	3.72165e+08	5.68413e+06	2.50388e+06	7.886e+08	4.76096e+06	5.65733e+08	5.62952e+07	3.70374e+06	2.9025e+08	2.7107e+08	4.90832e+06	2.70416e+08	4.18244e+08	2.92345e+06	1.09374e+08	4.30313e+08	4.85983e+06	3.96868e+06	2.79544e+08	2.72816e+08	4.63503e+08	7.56048e+08	9.60731e+06	1.07044e+07	3.43924e+06	2.63413e+08	4.21616e+08	2.19707e+08	3.42291e+06	2.88466e+08	3.32699e+08	5.12896e+08
	Checked	Structure	Name	Formula	Molecular Weight	CSID	# References
FALSE		C18 H38 O10	Full match	No results		414.245	9.437	7.87261e+08	0	No MS2	734929	34620.8	38238.2	662709	500848	532807	4.62805e+08	307424	4.01837e+07	5.44554e+08	2.53254e+06	283540	433414	1.42893e+06	277798	464388	329538	7.27456e+07	455954	437545	439109	2.47078e+06	460974	311810	311835	504329	431750	414110	1.49335e+06	2.85227e+07	339035	5.67098e+07	5.38464e+08	515351	2.46858e+06	298547	434731	433596	2.54798e+06
	Checked	Structure	Name	Formula	Molecular Weight	CSID	# References
FALSE	VS1150000	C18 H34 O4	Full match	Full match		314.246	12.295	7.86865e+08	7	No MS2	65478.1	15250	79141.6	1.31895e+08	1.46067e+08	1.61065e+06	4.26117e+06	8.06471e+06	1.54896e+06	7.92454e+06	6.26008e+08	651627	1.98435e+06	4.73253e+08	235263	1.02325e+08	9.38559e+07	2.63238e+06	1.37334e+08	7.67853e+07	2.98965e+06	7.86865e+08	869627	1.69057e+06	267353	1.24073e+08	1.3634e+08	2.44276e+06	5.59822e+08	286208	1.36939e+06	1.65287e+06	3.61596e+06	1.53425e+06	863115	237300	1.24681e+08	1.63382e+08	6.35661e+08
	Checked	Structure	Name	Formula	Molecular Weight	CSID	# References
	FALSE	# ACD/Labs04281710562D 22 21 0 0 0 0 0 0 0 0 1 V2000 3.9927 -8.0819 0.0000 O 0 0 0 0 0 0 0 0 0 0 0 0 15.2959 -2.3146 0.0000 O 0 0 0 0 0 0 0 0 0 0 0 0 5.9795 -9.2200 0.0000 O 0 0 0 0 0 0 0 0 0 0 0 0 13.3092 -1.1573 0.0000 O 0 0 0 0 0 0 0 0 0 0 0 0 5.3237 -8.0819 0.0000 C 0 0 0 0 0 0 0 0 0 0 0 0 13.9650 -2.3146 0.0000 C 0 0 0 0 0 0 0 0 0 0 0 0 5.9795 -6.9246 0.0000 C 0 0 0 0 0 0 0 0 0 0 0 0 13.3092…	VS1150000	C18 H34 O4	314.246	13837584	178
	FALSE	# ACD/Labs04281712472D 22 21 0 0 0 0 0 0 0 0 1 V2000 0.0000 -20.7766 0.0000 O 0 0 0 0 0 0 0 0 0 0 0 0 1.3383 -20.7766 0.0000 C 0 0 0 0 0 0 0 0 0 0 0 0 1.9965 -21.9394 0.0000 O 0 0 0 0 0 0 0 0 0 0 0 0 1.9965 -19.6358 0.0000 C 0 0 0 0 0 0 0 0 0 0 0 0 1.3383 -18.4730 0.0000 C 0 0 0 0 0 0 0 0 0 0 0 0 1.9965 -17.3102 0.0000 C 0 0 0 0 0 0 0 0 0 0 0 0 1.3383 -16.1693 0.0000 C 0 0 0 0 0 0 0 0 0 0 0 0 1.9…	Octadecanedioic acid	C18 H34 O4	314.246	63283	116
	FALSE	# ACD/Labs04221415492D 22 21 0 0 0 0 0 0 0 0 1 V2000 13.3340 -2.3288 0.0000 O 0 0 0 0 0 0 0 0 0 0 0 0 15.3124 -2.3288 0.0000 O 0 0 0 0 0 0 0 0 0 0 0 0 1.0923 -1.9372 0.0000 O 0 0 0 0 0 0 0 0 0 0 0 0 0.0000 0.0000 0.0000 O 0 0 0 0 0 0 0 0 0 0 0 0 13.6843 -0.7213 0.0000 C 0 0 0 0 0 0 0 0 0 0 0 0 14.9621 -0.7213 0.0000 C 0 0 0 0 0 0 0 0 0 0 0 0 12.5714 -0.0618 0.0000 C 0 0 0 0 0 0 0 0 0 0 0 0 16.075…	12,13-DiHOME	C18 H34 O4	314.246	8412123	28
	FALSE	# ACD/Labs04221415492D 22 22 0 0 0 0 0 0 0 0 1 V2000 10.8436 -0.1735 0.0000 O 0 0 0 0 0 0 0 0 0 0 0 0 1.1061 0.0000 0.0000 O 0 0 0 0 0 0 0 0 0 0 0 0 0.0000 -2.0169 0.0000 O 0 0 0 0 0 0 0 0 0 0 0 0 21.6873 -1.8868 0.0000 O 0 0 0 0 0 0 0 0 0 0 0 0 10.1930 -1.3012 0.0000 C 0 0 0 0 0 0 0 0 0 0 0 0 11.4943 -1.3012 0.0000 C 0 0 0 0 0 0 0 0 0 0 0 0 9.0219 -2.0169 0.0000 C 0 0 0 0 0 0 0 0 0 0 0 0 12.6220…	9,10-epoxy-18-hydroxyoctadecanoic acid	C18 H34 O4	314.246	7994062	24
	FALSE	#5282958 -OEChem-02070710102D 56 55 0 1 0 0 0 0 0999 V2000 9.7942 1.2500 0.0000 O 0 0 0 0 0 0 0 0 0 0 0 0 8.9282 -1.2500 0.0000 O 0 0 0 0 0 0 0 0 0 0 0 0 17.5885 -0.2500 0.0000 O 0 0 0 0 0 0 0 0 0 0 0 0 16.7224 1.2500 0.0000 O 0 0 0 0 0 0 0 0 0 0 0 0 10.6603 -0.2500 0.0000 C 0 0 0 0 0 0 0 0 0 0 0 0 11.5263 0.2500 0.0000 C 0 0 0 0 0 0 0 0 0 0 0 0 9.7942 0.2500 0.0000 C 0 0 3 0 0 0 0 0 0 0 0 0 12.3…	(12E)-9,10-Dihydroxy-12-octadecenoic acid	C18 H34 O4	314.246	4446085	23
	FALSE	# ACD/Labs04221415492D 22 21 0 0 0 0 0 0 0 0 1 V2000 9.6975 -2.3119 0.0000 O 0 0 0 0 0 0 0 0 0 0 0 0 11.6207 -2.3323 0.0000 O 0 0 0 0 0 0 0 0 0 0 0 0 1.0843 -1.9436 0.0000 O 0 0 0 0 0 0 0 0 0 0 0 0 0.0000 0.0000 0.0000 O 0 0 0 0 0 0 0 0 0 0 0 0 10.0453 -0.6547 0.0000 C 0 0 0 0 0 0 0 0 0 0 0 0 11.3138 -0.6547 0.0000 C 0 0 0 0 0 0 0 0 0 0 0 0 8.8792 0.0000 0.0000 C 0 0 0 0 0 0 0 0 0 0 0 0 12.4799 -…	9,10-DiHOME	C18 H34 O4	314.246	8142232	22
	FALSE	# ACD/Labs04221415492D 22 21 0 0 1 0 0 0 0 0 1 V2000 8.0397 0.0000 0.0000 O 0 0 0 0 0 0 0 0 0 0 0 0 9.2092 -3.3203 0.0000 O 0 0 0 0 0 0 0 0 0 0 0 0 1.1485 -0.0209 0.0000 O 0 0 0 0 0 0 0 0 0 0 0 0 0.0000 -2.0256 0.0000 O 0 0 0 0 0 0 0 0 0 0 0 0 8.0397 -1.3365 0.0000 C 0 0 0 0 0 0 0 0 0 0 0 0 9.1883 -1.9838 0.0000 C 0 0 0 0 0 0 0 0 0 0 0 0 6.8912 -2.0047 0.0000 C 0 0 0 0 0 0 0 0 0 0 0 0 10.3577 -1.…	(Z)-(7S,8S)-Dihydroxyoctadeca-9-enoate	C18 H34 O4	314.246	4444498	5
FALSE	VS1150000	C18 H34 O4	Full match	Full match		314.245	12.593	7.8458e+08	7	No MS2	1.2241e+06	123348	1.17153e+06	2.30943e+08	2.07667e+08	1.59127e+08	4.04166e+08	6.09097e+07	9.13268e+07	4.95187e+08	1.71184e+08	7.4467e+07	1.67252e+08	1.16401e+08	1.73403e+06	1.24243e+08	1.18946e+08	1.87582e+08	6.7566e+07	6.92145e+07	7.56652e+07	1.78336e+08	2.03324e+07	6.08928e+07	2.00878e+06	1.81502e+08	1.87865e+08	1.42525e+08	1.87751e+08	9.50257e+06	6.16052e+07	8.29614e+07	4.21283e+08	1.22331e+08	2.92068e+07	1.82646e+06	1.96793e+08	1.71877e+08	1.58098e+08
	Checked	Structure	Name	Formula	Molecular Weight	CSID	# References
	FALSE	# ACD/Labs04281710562D 22 21 0 0 0 0 0 0 0 0 1 V2000 3.9927 -8.0819 0.0000 O 0 0 0 0 0 0 0 0 0 0 0 0 15.2959 -2.3146 0.0000 O 0 0 0 0 0 0 0 0 0 0 0 0 5.9795 -9.2200 0.0000 O 0 0 0 0 0 0 0 0 0 0 0 0 13.3092 -1.1573 0.0000 O 0 0 0 0 0 0 0 0 0 0 0 0 5.3237 -8.0819 0.0000 C 0 0 0 0 0 0 0 0 0 0 0 0 13.9650 -2.3146 0.0000 C 0 0 0 0 0 0 0 0 0 0 0 0 5.9795 -6.9246 0.0000 C 0 0 0 0 0 0 0 0 0 0 0 0 13.3092…	VS1150000	C18 H34 O4	314.246	13837584	178
	FALSE	# ACD/Labs04281712472D 22 21 0 0 0 0 0 0 0 0 1 V2000 0.0000 -20.7766 0.0000 O 0 0 0 0 0 0 0 0 0 0 0 0 1.3383 -20.7766 0.0000 C 0 0 0 0 0 0 0 0 0 0 0 0 1.9965 -21.9394 0.0000 O 0 0 0 0 0 0 0 0 0 0 0 0 1.9965 -19.6358 0.0000 C 0 0 0 0 0 0 0 0 0 0 0 0 1.3383 -18.4730 0.0000 C 0 0 0 0 0 0 0 0 0 0 0 0 1.9965 -17.3102 0.0000 C 0 0 0 0 0 0 0 0 0 0 0 0 1.3383 -16.1693 0.0000 C 0 0 0 0 0 0 0 0 0 0 0 0 1.9…	Octadecanedioic acid	C18 H34 O4	314.246	63283	116
	FALSE	# ACD/Labs04221415492D 22 21 0 0 0 0 0 0 0 0 1 V2000 13.3340 -2.3288 0.0000 O 0 0 0 0 0 0 0 0 0 0 0 0 15.3124 -2.3288 0.0000 O 0 0 0 0 0 0 0 0 0 0 0 0 1.0923 -1.9372 0.0000 O 0 0 0 0 0 0 0 0 0 0 0 0 0.0000 0.0000 0.0000 O 0 0 0 0 0 0 0 0 0 0 0 0 13.6843 -0.7213 0.0000 C 0 0 0 0 0 0 0 0 0 0 0 0 14.9621 -0.7213 0.0000 C 0 0 0 0 0 0 0 0 0 0 0 0 12.5714 -0.0618 0.0000 C 0 0 0 0 0 0 0 0 0 0 0 0 16.075…	12,13-DiHOME	C18 H34 O4	314.246	8412123	28
	FALSE	# ACD/Labs04221415492D 22 22 0 0 0 0 0 0 0 0 1 V2000 10.8436 -0.1735 0.0000 O 0 0 0 0 0 0 0 0 0 0 0 0 1.1061 0.0000 0.0000 O 0 0 0 0 0 0 0 0 0 0 0 0 0.0000 -2.0169 0.0000 O 0 0 0 0 0 0 0 0 0 0 0 0 21.6873 -1.8868 0.0000 O 0 0 0 0 0 0 0 0 0 0 0 0 10.1930 -1.3012 0.0000 C 0 0 0 0 0 0 0 0 0 0 0 0 11.4943 -1.3012 0.0000 C 0 0 0 0 0 0 0 0 0 0 0 0 9.0219 -2.0169 0.0000 C 0 0 0 0 0 0 0 0 0 0 0 0 12.6220…	9,10-epoxy-18-hydroxyoctadecanoic acid	C18 H34 O4	314.246	7994062	24
	FALSE	#5282958 -OEChem-02070710102D 56 55 0 1 0 0 0 0 0999 V2000 9.7942 1.2500 0.0000 O 0 0 0 0 0 0 0 0 0 0 0 0 8.9282 -1.2500 0.0000 O 0 0 0 0 0 0 0 0 0 0 0 0 17.5885 -0.2500 0.0000 O 0 0 0 0 0 0 0 0 0 0 0 0 16.7224 1.2500 0.0000 O 0 0 0 0 0 0 0 0 0 0 0 0 10.6603 -0.2500 0.0000 C 0 0 0 0 0 0 0 0 0 0 0 0 11.5263 0.2500 0.0000 C 0 0 0 0 0 0 0 0 0 0 0 0 9.7942 0.2500 0.0000 C 0 0 3 0 0 0 0 0 0 0 0 0 12.3…	(12E)-9,10-Dihydroxy-12-octadecenoic acid	C18 H34 O4	314.246	4446085	23
	FALSE	# ACD/Labs04221415492D 22 21 0 0 0 0 0 0 0 0 1 V2000 9.6975 -2.3119 0.0000 O 0 0 0 0 0 0 0 0 0 0 0 0 11.6207 -2.3323 0.0000 O 0 0 0 0 0 0 0 0 0 0 0 0 1.0843 -1.9436 0.0000 O 0 0 0 0 0 0 0 0 0 0 0 0 0.0000 0.0000 0.0000 O 0 0 0 0 0 0 0 0 0 0 0 0 10.0453 -0.6547 0.0000 C 0 0 0 0 0 0 0 0 0 0 0 0 11.3138 -0.6547 0.0000 C 0 0 0 0 0 0 0 0 0 0 0 0 8.8792 0.0000 0.0000 C 0 0 0 0 0 0 0 0 0 0 0 0 12.4799 -…	9,10-DiHOME	C18 H34 O4	314.246	8142232	22
	FALSE	# ACD/Labs04221415492D 22 21 0 0 1 0 0 0 0 0 1 V2000 8.0397 0.0000 0.0000 O 0 0 0 0 0 0 0 0 0 0 0 0 9.2092 -3.3203 0.0000 O 0 0 0 0 0 0 0 0 0 0 0 0 1.1485 -0.0209 0.0000 O 0 0 0 0 0 0 0 0 0 0 0 0 0.0000 -2.0256 0.0000 O 0 0 0 0 0 0 0 0 0 0 0 0 8.0397 -1.3365 0.0000 C 0 0 0 0 0 0 0 0 0 0 0 0 9.1883 -1.9838 0.0000 C 0 0 0 0 0 0 0 0 0 0 0 0 6.8912 -2.0047 0.0000 C 0 0 0 0 0 0 0 0 0 0 0 0 10.3577 -1.…	(Z)-(7S,8S)-Dihydroxyoctadeca-9-enoate	C18 H34 O4	314.246	4444498	5
FALSE	Prostan-1-oicacid, 9,11,15-trihydroxy-, (9a,11a,15S)-	C20 H38 O5	Full match	Full match		358.271	14.578	7.80764e+08	1	No MS2	289391	45863	291631	3.3692e+08	3.03435e+08	876231	944164	605436	514577	2.37392e+06	7.02391e+08	1.01116e+06	1.53633e+06	4.86695e+08	736592	1.73269e+08	1.26531e+08	1.78469e+06	1.94334e+08	7.92304e+07	2.67471e+06	7.80764e+08	511856	1.79616e+06	770848	2.47816e+08	2.23937e+08	651015	6.32085e+08	523218	2.40132e+06	1.99953e+06	401583	904004	503870	701105	2.40828e+08	2.46902e+08	5.67803e+08
	Checked	Structure	Name	Formula	Molecular Weight	CSID	# References
	FALSE	#5311239 -OEChem-02070710132D 63 63 0 1 0 0 0 0 0999 V2000 11.9356 -1.8216 0.0000 O 0 0 0 0 0 0 0 0 0 0 0 0 9.0877 -3.8907 0.0000 O 0 0 0 0 0 0 0 0 0 0 0 0 10.1755 1.4571 0.0000 O 0 0 0 0 0 0 0 0 0 0 0 0 2.5897 -3.5711 0.0000 O 0 0 0 0 0 0 0 0 0 0 0 0 3.1249 -1.9238 0.0000 O 0 0 0 0 0 0 0 0 0 0 0 0 10.1755 -1.5429 0.0000 C 0 0 2 0 0 0 0 0 0 0 0 0 9.3665 -2.1307 0.0000 C 0 0 2 0 0 0 0 0 0 0 0 0 10…	Prostan-1-oicacid, 9,11,15-trihydroxy-, (9a,11a,15S)-	C20 H38 O5	358.272	4470758	31
FALSE			No results	No results		139.061	1.005	7.77743e+08	0	No MS2	13762.9	13589.5	16821.7	1.51004e+08	1.37803e+08	8.49691e+07	3.10655e+06	7.45769e+07	3.6558e+07	1.89338e+07	1.27185e+08	9.86313e+06	1.67255e+07	4.78483e+07	90957.8	1.45662e+08	1.53545e+08	1.16241e+07	3.32076e+07	4.32905e+07	5.1284e+07	3.23696e+07	6.09439e+08	1.04173e+08	99640.4	1.39761e+08	1.47092e+08	6.88233e+07	3.39921e+07	1.39525e+06	1.22841e+07	2.81269e+07	7.34181e+06	7.77624e+07	1.11106e+06	105367	1.49293e+08	1.43952e+08	5.20729e+07
	Checked	Structure	Name	Formula	Molecular Weight	CSID	# References
FALSE	Acetylcarnitine	C9 H17 N O4	Full match	Full match		203.116	1.544	7.76962e+08	3	No MS2	9930.94	10007.2	11652.8	1.49413e+06	1.4615e+06	705184	500323	624919	953981	1.13588e+06	1.84938e+06	811098	977139	1.09523e+06	65336.7	979103	907429	607560	658460	545704	1.16578e+06	835263	1.70896e+06	821243	72147.8	1.45563e+06	1.24738e+06	747863	1.48286e+06	797659	983162	845489	523127	828384	742505	70445.6	1.19815e+06	1.29611e+06	1.05148e+06
	Checked	Structure	Name	Formula	Molecular Weight	CSID	# References
	FALSE	#LS-17075 14 13 0 0 0 0 0 0 0999 V2000 -2.1666 -2.2458 0.0000 C 0 0 0 0 0 0 0 0 0 0 0 0 -1.5208 -2.6208 0.0000 C 0 0 3 0 0 0 0 0 0 0 0 0 -0.8708 -2.2458 0.0000 C 0 0 0 0 0 0 0 0 0 0 0 0 -0.2208 -2.6208 0.0000 C 0 0 0 0 0 0 0 0 0 0 0 0 0.4250 -2.2458 0.0000 O 0 5 0 0 0 0 0 0 0 0 0 0 -0.2208 -3.3708 0.0000 O 0 0 0 0 0 0 0 0 0 0 0 0 -1.5208 -3.3667 0.0000 O 0 0 0 0 0 0 0 0 0 0 0 0 -2.1666 -3.7375 0.…	Acetylcarnitine	C9 H17 N O4	203.116	21243783	127
	FALSE	# ACD/Labs04281711462D 14 13 0 0 1 0 0 0 0 0 2 V2000 2.3054 -3.9903 0.0000 C 0 0 0 0 0 0 0 0 0 0 0 0 3.4616 -3.3276 0.0000 C 0 0 0 0 0 0 0 0 0 0 0 0 1.1562 -3.3276 0.0000 C 0 0 0 0 0 0 0 0 0 0 0 0 4.6107 -3.9903 0.0000 C 0 0 0 0 0 0 0 0 0 0 0 0 5.7669 -3.3276 0.0000 N 0 3 0 0 0 0 0 0 0 0 0 0 3.4616 -1.9952 0.0000 O 0 0 0 0 0 0 0 0 0 0 0 0 0.0000 -3.9903 0.0000 O 0 5 0 0 0 0 0 0 0 0 0 0 1.1562 -1.…	Acetylcarnitine	C9 H17 N O4	203.116	5406074	52
	FALSE	# ACD/Labs06201714052D 14 13 0 0 1 0 0 0 0 0 1 V2000 5.7555 -1.3335 0.0000 C 0 0 0 0 0 0 0 0 0 0 0 0 4.6085 -1.9968 0.0000 C 0 0 0 0 0 0 0 0 0 0 0 0 4.6085 -3.3234 0.0000 C 0 0 0 0 0 0 0 0 0 0 0 0 5.7555 -3.9936 0.0000 C 0 0 0 0 0 0 0 0 0 0 0 0 6.9093 -3.3234 0.0000 O 0 0 0 0 0 0 0 0 0 0 0 0 5.7555 -5.3202 0.0000 O 0 0 0 0 0 0 0 0 0 0 0 0 3.4547 -3.9936 0.0000 N 0 0 0 0 0 0 0 0 0 0 0 0 2.3008 -3.…	N-[(2S)-2-Hydroxypropanoyl]-L-leucine	C9 H17 N O4	203.116	59664332	4
FALSE		C20 H36 N2 O	Full match	No results		320.282	11.74	7.72963e+08	0	No MS2	222016	12394.7	173465	6.54836e+07	5.58916e+07	339358	183491	286755	193587	526542	7.72963e+08	193425	375110	5.62215e+08	260811	4.91673e+07	3.92994e+07	224075	4.69443e+07	9.94793e+06	528180	5.80829e+08	219839	271455	275727	6.95651e+07	6.55116e+07	252642	6.05541e+08	265049	278196	172855	202665	320969	225684	270465	5.22102e+07	6.10321e+07	6.94881e+08
	Checked	Structure	Name	Formula	Molecular Weight	CSID	# References
FALSE		C23 H42 N2 O2	Full match	No results		378.324	14.316	7.63273e+08	0	No MS2	173753	21828	189610	1.60782e+08	1.68849e+08	488474	517995	273963	283709	741184	7.38057e+08	224085	523275	4.81699e+08	269564	9.47061e+07	7.12725e+07	462808	7.46545e+07	2.25516e+07	569935	7.63273e+08	331363	358648	307378	1.35915e+08	1.26266e+08	433604	4.49994e+08	311437	378557	243809	763092	399936	283546	318244	1.46572e+08	1.4514e+08	6.36612e+08
	Checked	Structure	Name	Formula	Molecular Weight	CSID	# References
FALSE		C16 H31 N O	Full match	No results		253.24	14.464	7.60995e+08	0	No MS2	108776	12077.3	99040.7	1.31423e+08	1.40979e+08	9.67926e+07	1.92945e+08	3.11566e+07	1.15074e+07	2.71343e+08	4.90353e+08	1.45653e+07	6.58704e+07	3.89053e+08	153839	9.36154e+07	1.01327e+08	5.38232e+07	4.31026e+08	1.48652e+08	5.7863e+07	7.60995e+08	3.22027e+07	1.74026e+07	190949	1.35536e+08	1.3237e+08	6.20383e+07	6.31342e+08	3.94986e+07	2.81762e+07	3.44985e+07	1.6175e+08	8.18313e+07	2.61586e+07	145205	1.41125e+08	1.39845e+08	6.13414e+08
	Checked	Structure	Name	Formula	Molecular Weight	CSID	# References
FALSE		C12 H20 O8	Full match	No results		292.115	11.128	7.58369e+08	0	No MS2	170913	11157.3	210727	1.3579e+08	1.27149e+08	232396	172716	154550	152470	241052	6.44582e+08	165412	179870	5.15564e+08	139014	1.10021e+08	9.85765e+07	179634	1.18277e+08	3.1517e+07	215819	5.89991e+08	167899	195036	153289	1.49184e+08	1.5363e+08	219775	6.02224e+08	249104	217195	170478	189956	261761	177666	136039	1.31289e+08	1.43677e+08	5.64651e+08
	Checked	Structure	Name	Formula	Molecular Weight	CSID	# References
FALSE	Timonacic	C4 H7 N O2 S	Full match	Full match		133.02	1.124	7.57841e+08	1	No MS2	19015	21497.7	22238.4	2.93088e+07	2.94691e+07	7.66496e+06	5.86798e+06	6.61712e+06	5.9954e+06	7.41395e+06	8.28436e+07	6.91018e+06	8.66069e+06	7.417e+07	137956	2.55818e+07	2.36659e+07	7.55045e+06	1.86355e+07	1.514e+07	8.09543e+06	8.26491e+07	1.09971e+08	7.41813e+06	160921	2.71609e+07	2.711e+07	8.64644e+06	5.36412e+07	4.04237e+06	8.09139e+06	5.98836e+06	5.88689e+06	8.33027e+06	7.57841e+08	140553	2.68057e+07	2.81315e+07	8.97379e+07
	Checked	Structure	Name	Formula	Molecular Weight	CSID	# References
	FALSE	MolHeader ELEMENTL12251715552D Dotmatics Elemental 8 8 0 0 0 0 999 V2000 -9.9974 1.6578 0.0000 C 0 0 0 0 0 -9.5864 2.9228 0.0000 S 0 0 0 0 0 -8.9214 0.8761 0.0000 N 0 0 0 0 0 -7.8454 1.6578 0.0000 C 0 0 0 0 0 -8.2563 2.9228 0.0000 C 0 0 0 0 0 -6.6935 0.9928 0.0000 C 0 0 0 0 0 -5.5417 1.6578 0.0000 O 0 0 0 0 0 -6.6935 -0.3372 0.0000 O 0 0 0 0 0 1 2 1 0 0 0 1 3 1 0 0 0 3 4 1 0 0 0 4 5 1 0 0 0 5 2 1…	Timonacic	C4 H7 N O2 S	133.02	9546	283
FALSE	N-Methylpyrrolidone	C5 H9 N O	Full match	Full match		99.0687	1.146	7.55883e+08	5	No MS2	15580	16377.9	18623.1	4.74109e+08	4.43763e+08	7.38789e+08	5.05099e+08	5.18397e+08	4.87425e+08	5.34487e+08	8.68547e+07	5.50043e+08	6.97934e+08	1.46211e+08	8.54468e+06	3.26554e+08	3.43554e+08	6.51251e+08	4.76759e+08	4.88037e+08	6.3875e+08	8.91512e+06	4.108e+08	5.89803e+08	923232	4.30755e+08	3.72392e+08	7.35721e+08	3.85315e+08	1.56937e+07	6.86337e+08	5.07452e+08	5.10896e+08	6.79542e+08	5.58364e+08	1.17139e+06	4.27271e+08	4.33409e+08	4.70805e+06
	Checked	Structure	Name	Formula	Molecular Weight	CSID	# References
	FALSE	# ACD/Labs03221913572D 7 7 0 0 0 0 0 0 0 0 1 V2000 1.0694 -3.3757 0.0000 C 0 0 0 0 0 0 0 0 0 0 0 0 1.0728 -2.0466 0.0000 N 0 0 0 0 0 0 0 0 0 0 0 0 0.0000 -1.2676 0.0000 C 0 0 0 0 0 0 0 0 0 0 0 0 0.4066 0.0000 0.0000 C 0 0 0 0 0 0 0 0 0 0 0 0 1.7357 0.0000 0.0000 C 0 0 0 0 0 0 0 0 0 0 0 0 2.1525 -1.2676 0.0000 C 0 0 0 0 0 0 0 0 0 0 0 0 3.4167 -1.6776 0.0000 O 0 0 0 0 0 0 0 0 0 0 0 0 1 2 1 0 0 0 0 …	N-Methylpyrrolidone	C5 H9 N O	99.0684	12814	731
	FALSE	# ACD/Labs03221913572D 7 7 0 0 0 0 0 0 0 0 1 V2000 1.1509 0.0000 0.0000 C 0 0 0 0 0 0 0 0 0 0 0 0 0.0000 -0.6636 0.0000 C 0 0 0 0 0 0 0 0 0 0 0 0 0.0000 -1.9943 0.0000 C 0 0 0 0 0 0 0 0 0 0 0 0 1.1509 -2.6579 0.0000 N 0 0 0 0 0 0 0 0 0 0 0 0 2.3053 -1.9943 0.0000 C 0 0 0 0 0 0 0 0 0 0 0 0 2.3053 -0.6636 0.0000 C 0 0 0 0 0 0 0 0 0 0 0 0 3.4563 -2.6579 0.0000 O 0 0 0 0 0 0 0 0 0 0 0 0 1 2 1 0 0 0 0…	TO0110000	C5 H9 N O	99.0684	12144	251
	FALSE	# ACD/Labs04281711282D 7 7 0 0 0 0 0 0 0 0 1 V2000 2.9771 -3.6937 0.0000 O 0 0 0 0 0 0 0 0 0 0 0 0 1.6769 -3.4167 0.0000 C 0 0 0 0 0 0 0 0 0 0 0 0 1.2669 -2.1534 0.0000 N 0 0 0 0 0 0 0 0 0 0 0 0 2.0463 -1.0749 0.0000 C 0 0 0 0 0 0 0 0 0 0 0 0 1.2669 0.0000 0.0000 C 0 0 0 0 0 0 0 0 0 0 0 0 0.0000 -0.4100 0.0000 C 0 0 0 0 0 0 0 0 0 0 0 0 0.0000 -1.7397 0.0000 C 0 0 0 0 0 0 0 0 0 0 0 0 1 2 2 0 0 0 0…	106540	C5 H9 N O	99.0684	69787	87
	FALSE	# ACD/Labs04281712452D 7 6 0 0 1 0 0 0 0 0 1 V2000 3.2461 -1.6039 0.0000 O 0 0 0 0 0 0 0 0 0 0 0 0 4.7877 0.0000 0.0000 N 0 0 0 0 0 0 0 0 0 0 0 0 2.3029 -0.6607 0.0000 C 0 0 0 0 0 0 0 0 0 0 0 0 3.4567 0.0000 0.0000 C 0 0 0 0 0 0 0 0 0 0 0 0 1.1538 0.0000 0.0000 C 0 0 0 0 0 0 0 0 0 0 0 0 1.3645 -1.6039 0.0000 C 0 0 0 0 0 0 0 0 0 0 0 0 0.0000 -0.6607 0.0000 C 0 0 0 0 0 0 0 0 0 0 0 0 1 3 1 0 0 0 0 2…	(R)-2-hydroxy-2-methylbutyronitrile	C5 H9 N O	99.0684	26332035	22
	FALSE	#53654 -OEChem-02070708202D 16 16 0 1 0 0 0 0 0999 V2000 4.2601 0.7694 0.0000 O 0 0 0 0 0 0 0 0 0 0 0 0 3.7601 -0.7694 0.0000 N 0 0 0 0 0 0 0 0 0 0 0 0 4.5691 -0.1816 0.0000 C 0 0 3 0 0 0 0 0 0 0 0 0 3.2601 0.7694 0.0000 C 0 0 0 0 0 0 0 0 0 0 0 0 2.9511 -0.1816 0.0000 C 0 0 0 0 0 0 0 0 0 0 0 0 5.5201 -0.4907 0.0000 C 0 0 0 0 0 0 0 0 0 0 0 0 2.0000 -0.4907 0.0000 C 0 0 0 0 0 0 0 0 0 0 0 0 4.6661 -…	2,4-DIMETHYL-3-OXAZOLINE	C5 H9 N O	99.0684	48440	16
FALSE	(+/-)-Camphor	C10 H16 O	Full match	Full match		152.12	11.349	7.55835e+08	94	No MS2	153160	11375.3	285388	1.61456e+08	1.44793e+08	490763	507989	569257	337464	882010	6.67981e+08	381551	595052	3.64484e+08	328130	1.69725e+08	1.24754e+08	526252	6.30546e+07	1.66734e+08	732750	6.36432e+08	831282	512552	352938	1.75806e+08	1.60745e+08	674778	6.78241e+08	620795	374142	322860	443972	610547	468931	220286	1.66298e+08	1.67701e+08	6.4522e+08
	Checked	Structure	Name	Formula	Molecular Weight	CSID	# References
	FALSE	# ACD/Labs06251410122D 11 12 0 0 0 0 0 0 0 0 1 V2000 2.5946 0.0000 0.0000 O 0 0 0 0 0 0 0 0 0 0 0 0 1.9450 -1.1242 0.0000 C 0 0 0 0 0 0 0 0 0 0 0 0 0.6496 -1.1242 0.0000 C 0 0 0 0 0 0 0 0 0 0 0 0 0.0000 -2.2445 0.0000 C 0 0 0 0 0 0 0 0 0 0 0 0 1.2954 -1.4976 0.0000 C 0 0 0 0 0 0 0 0 0 0 0 0 2.5946 -2.2445 0.0000 C 0 0 0 0 0 0 0 0 0 0 0 0 3.8900 -2.2445 0.0000 C 0 0 0 0 0 0 0 0 0 0 0 0 1.9450 -3.3…	(+/-)-Camphor	C10 H16 O	152.12	2441	2410
	FALSE	# ACD/Labs04281710402D 11 10 0 0 0 0 0 0 0 0 1 V2000 0.0000 -6.9157 0.0000 O 0 0 0 0 0 0 0 0 0 0 0 0 1.3278 -6.9157 0.0000 C 0 0 0 0 0 0 0 0 0 0 0 0 1.9986 -5.7608 0.0000 C 0 0 0 0 0 0 0 0 0 0 0 0 3.3265 -5.7608 0.0000 C 0 0 0 0 0 0 0 0 0 0 0 0 3.9904 -4.6128 0.0000 C 0 0 0 0 0 0 0 0 0 0 0 0 3.3265 -3.4579 0.0000 C 0 0 0 0 0 0 0 0 0 0 0 0 3.9904 -2.3029 0.0000 C 0 0 0 0 0 0 0 0 0 0 0 0 3.3265 -1.…	Citral	C10 H16 O	152.12	553578	515
	FALSE	# ACD/Labs04281710392D 11 12 0 0 1 0 0 0 0 0 1 V2000 0.6474 0.0000 0.0000 C 0 0 0 0 0 0 0 0 0 0 0 0 0.0000 -1.1227 0.0000 C 0 0 0 0 0 0 0 0 0 0 0 0 0.6474 -3.7424 0.0000 C 0 0 0 0 0 0 0 0 0 0 0 0 1.2949 -0.3742 0.0000 C 0 0 0 0 0 0 0 0 0 0 0 0 0.6474 -1.4970 0.0000 C 0 0 0 0 0 0 0 0 0 0 0 0 3.2409 -1.4970 0.0000 C 0 0 0 0 0 0 0 0 0 0 0 0 2.5935 -0.3742 0.0000 C 0 0 0 0 0 0 0 0 0 0 0 0 2.5935 -2.6…	D-camphor	C10 H16 O	152.12	139902	317
	FALSE	# ACD/Labs03221913572D 11 12 0 0 0 0 0 0 0 0 1 V2000 2.7056 -4.4870 0.0000 C 0 0 0 0 0 0 0 0 0 0 0 0 2.2614 -3.2620 0.0000 C 0 0 0 0 0 0 0 0 0 0 0 0 3.5447 -3.0332 0.0000 C 0 0 0 0 0 0 0 0 0 0 0 0 1.1307 -3.9126 0.0000 C 0 0 0 0 0 0 0 0 0 0 0 0 0.0000 -3.2620 0.0000 C 0 0 0 0 0 0 0 0 0 0 0 0 0.0000 -1.9563 0.0000 C 0 0 0 0 0 0 0 0 0 0 0 0 1.1307 -1.3057 0.0000 C 0 0 0 0 0 0 0 0 0 0 0 0 1.1307 0.0…	Fenchone	C10 H16 O	152.12	13869	216
	FALSE	# ACD/Labs04111411492D 11 11 0 0 0 0 0 0 0 0 1 V2000 0.0000 -1.9925 0.0000 C 0 0 0 0 0 0 0 0 0 0 0 0 0.0000 -3.3269 0.0000 C 0 0 0 0 0 0 0 0 0 0 0 0 2.3037 -1.9925 0.0000 C 0 0 0 0 0 0 0 0 0 0 0 0 1.1488 -1.3283 0.0000 C 0 0 0 0 0 0 0 0 0 0 0 0 1.1488 0.0000 0.0000 C 0 0 0 0 0 0 0 0 0 0 0 0 1.1488 -3.9910 0.0000 C 0 0 0 0 0 0 0 0 0 0 0 0 2.3037 -5.9835 0.0000 C 0 0 0 0 0 0 0 0 0 0 0 0 1.1488 -5.3…	(.+/-.)-Pulegone	C10 H16 O	152.12	6722	186
	FALSE	# ACD/Labs04111411492D 11 11 0 0 0 0 0 0 0 0 1 V2000 2.2980 -2.0380 0.0000 C 0 0 0 0 0 0 0 0 0 0 0 0 1.1672 -1.3304 0.0000 C 0 0 0 0 0 0 0 0 0 0 0 0 0.0181 -2.0380 0.0000 C 0 0 0 0 0 0 0 0 0 0 0 0 0.0181 -3.3442 0.0000 C 0 0 0 0 0 0 0 0 0 0 0 0 1.1672 -4.0518 0.0000 C 0 0 0 0 0 0 0 0 0 0 0 0 2.2980 -3.3442 0.0000 C 0 0 0 0 0 0 0 0 0 0 0 0 3.4652 -1.3909 0.0000 O 0 0 0 0 0 0 0 0 0 0 0 0 1.1672 0.0…	CARVEOL, CIS-(-)-	C10 H16 O	152.12	7160	145
	FALSE	# ACD/Labs06251410052D 11 11 0 0 0 0 0 0 0 0 1 V2000 3.3222 -5.7577 0.0000 C 0 0 0 0 0 0 0 0 0 0 0 0 3.9901 -4.6062 0.0000 C 0 0 0 0 0 0 0 0 0 0 0 0 3.3222 -3.4546 0.0000 C 0 0 0 0 0 0 0 0 0 0 0 0 3.9901 -2.3031 0.0000 C 0 0 0 0 0 0 0 0 0 0 0 0 3.3222 -1.1515 0.0000 C 0 0 0 0 0 0 0 0 0 0 0 0 1.9922 -1.1515 0.0000 C 0 0 0 0 0 0 0 0 0 0 0 0 1.3300 0.0000 0.0000 C 0 0 0 0 0 0 0 0 0 0 0 0 0.0000 0.00…	Perillic alcohol	C10 H16 O	152.12	10362	142
	FALSE	# ACD/Labs04281711342D 11 11 0 0 0 0 0 0 0 0 1 V2000 4.4772 -3.4564 0.0000 O 0 0 0 0 0 0 0 0 0 0 0 0 3.1475 -3.4564 0.0000 C 0 0 0 0 0 0 0 0 0 0 0 0 2.4804 -2.3058 0.0000 C 0 0 0 0 0 0 0 0 0 0 0 0 3.1475 -1.1551 0.0000 C 0 0 0 0 0 0 0 0 0 0 0 0 4.4772 -1.1551 0.0000 C 0 0 0 0 0 0 0 0 0 0 0 0 2.4804 0.0000 0.0000 C 0 0 0 0 0 0 0 0 0 0 0 0 1.1506 0.0000 0.0000 C 0 0 0 0 0 0 0 0 0 0 0 0 0.4880 -1.15…	3639	C10 H16 O	152.12	9511	133
	FALSE	# ACD/Labs04221415492D 11 11 0 0 0 0 0 0 0 0 1 V2000 3.4539 -1.3289 0.0000 O 0 0 0 0 0 0 0 0 0 0 0 0 1.1553 -3.9927 0.0000 C 0 0 0 0 0 0 0 0 0 0 0 0 2.3046 -1.9933 0.0000 C 0 0 0 0 0 0 0 0 0 0 0 0 1.1553 -1.3289 0.0000 C 0 0 0 0 0 0 0 0 0 0 0 0 2.3046 -3.3222 0.0000 C 0 0 0 0 0 0 0 0 0 0 0 0 0.0000 -3.3222 0.0000 C 0 0 0 0 0 0 0 0 0 0 0 0 0.0000 -1.9933 0.0000 C 0 0 0 0 0 0 0 0 0 0 0 0 1.1553 -5.…	3565	C10 H16 O	152.12	22881	127
	FALSE	# ACD/Labs04281711142D 12 12 0 0 1 0 0 0 0 0 1 V2000 4.4768 -5.2724 0.0000 C 0 0 0 0 0 0 0 0 0 0 0 0 3.3249 -4.6074 0.0000 C 0 0 0 0 0 0 0 0 0 0 0 0 3.3249 -5.9374 0.0000 H 0 0 0 0 0 0 0 0 0 0 0 0 3.9899 -3.4555 0.0000 C 0 0 0 0 0 0 0 0 0 0 0 0 3.3249 -2.3037 0.0000 C 0 0 0 0 0 0 0 0 0 0 0 0 1.9950 -2.3037 0.0000 C 0 0 0 0 0 0 0 0 0 0 0 0 1.3300 -1.1518 0.0000 C 0 0 0 0 0 0 0 0 0 0 0 0 1.9950 0.0…	(R)-(+)-Pulegone	C10 H16 O	152.12	390923	121
	FALSE	# ACD/Labs06251410052D 11 10 0 0 0 0 0 0 0 0 1 V2000 0.0000 -3.4557 0.0000 C 0 0 0 0 0 0 0 0 0 0 0 0 1.3328 -3.4557 0.0000 C 0 0 0 0 0 0 0 0 0 0 0 0 2.6576 -3.4557 0.0000 C 0 0 0 0 0 0 0 0 0 0 0 0 3.9904 -3.4557 0.0000 C 0 0 0 0 0 0 0 0 0 0 0 0 4.6528 -2.3065 0.0000 C 0 0 0 0 0 0 0 0 0 0 0 0 5.9856 -2.3065 0.0000 C 0 0 0 0 0 0 0 0 0 0 0 0 6.6480 -1.1572 0.0000 C 0 0 0 0 0 0 0 0 0 0 0 0 5.9856 0.0…	UNII:L06OT2435M	C10 H16 O	152.12	56576	115
	FALSE	# ACD/Labs04111411492D 11 11 0 0 0 0 0 0 0 0 1 V2000 1.6923 -2.9888 0.0000 C 0 0 0 0 0 0 0 0 0 0 0 0 3.0232 -2.9888 0.0000 C 0 0 0 0 0 0 0 0 0 0 0 0 1.4170 0.0000 0.0000 C 0 0 0 0 0 0 0 0 0 0 0 0 2.3635 -0.9466 0.0000 C 0 0 0 0 0 0 0 0 0 0 0 0 3.2986 0.0000 0.0000 C 0 0 0 0 0 0 0 0 0 0 0 0 1.2793 -1.7210 0.0000 C 0 0 0 0 0 0 0 0 0 0 0 0 0.0000 -1.3768 0.0000 C 0 0 0 0 0 0 0 0 0 0 0 0 3.4363 -1.72…	.alpha.-Campholenal	C10 H16 O	152.12	88952	114
	FALSE	# ACD/Labs04111411492D 11 12 0 0 0 0 0 0 0 0 1 V2000 0.0000 -1.9921 0.0000 C 0 0 0 0 0 0 0 0 0 0 0 0 2.3032 -3.3261 0.0000 C 0 0 0 0 0 0 0 0 0 0 0 0 2.3032 -1.9921 0.0000 C 0 0 0 0 0 0 0 0 0 0 0 0 0.0000 -3.3261 0.0000 C 0 0 0 0 0 0 0 0 0 0 0 0 1.1486 0.0000 0.0000 C 0 0 0 0 0 0 0 0 0 0 0 0 0.0000 -5.9822 0.0000 C 0 0 0 0 0 0 0 0 0 0 0 0 1.1486 -5.3182 0.0000 C 0 0 0 0 0 0 0 0 0 0 0 0 2.3032 -5.9…	LMO	C10 H16 O	152.12	82617	104
	FALSE	# ACD/Labs04111411492D 11 11 0 0 0 0 0 0 0 0 1 V2000 3.4525 -1.9925 0.0000 C 0 0 0 0 0 0 0 0 0 0 0 0 3.4525 -3.3269 0.0000 C 0 0 0 0 0 0 0 0 0 0 0 0 2.3037 -1.3283 0.0000 C 0 0 0 0 0 0 0 0 0 0 0 0 2.3037 -3.9910 0.0000 C 0 0 0 0 0 0 0 0 0 0 0 0 1.1488 -1.9925 0.0000 C 0 0 0 0 0 0 0 0 0 0 0 0 1.1488 -3.3269 0.0000 C 0 0 0 0 0 0 0 0 0 0 0 0 2.3037 -5.3194 0.0000 C 0 0 0 0 0 0 0 0 0 0 0 0 1.1488 -5.…	Piperitone	C10 H16 O	152.12	6721	104
	FALSE	# ACD/Labs04281712352D 11 11 0 0 1 0 0 0 0 0 1 V2000 6.8710 -1.9720 0.0000 C 0 0 0 0 0 0 0 0 0 0 0 0 5.6892 -1.3398 0.0000 C 0 0 0 0 0 0 0 0 0 0 0 0 4.5486 -2.0476 0.0000 C 0 0 0 0 0 0 0 0 0 0 0 0 3.4149 -1.4223 0.0000 C 0 0 0 0 0 0 0 0 0 0 0 0 2.2606 -2.0750 0.0000 C 0 0 0 0 0 0 0 0 0 0 0 0 2.3224 -3.4149 0.0000 C 0 0 0 0 0 0 0 0 0 0 0 0 3.4561 -4.0402 0.0000 C 0 0 0 0 0 0 0 0 0 0 0 0 4.6104 -3.…	2664	C10 H16 O	152.12	327861	100
	FALSE	# ACD/Labs04281711152D 12 12 0 0 1 0 0 0 0 0 1 V2000 3.6369 -5.6299 0.0000 C 0 0 0 0 0 0 0 0 0 0 0 0 3.6369 -4.3012 0.0000 C 0 0 0 0 0 0 0 0 0 0 0 0 4.7854 -3.6369 0.0000 C 0 0 0 0 0 0 0 0 0 0 0 0 2.4828 -3.6369 0.0000 C 0 0 0 0 0 0 0 0 0 0 0 0 2.4828 -4.9655 0.0000 H 0 0 0 0 0 0 0 0 0 0 0 0 3.1471 -2.4828 0.0000 C 0 0 0 0 0 0 0 0 0 0 0 0 2.4828 -1.3286 0.0000 C 0 0 0 0 0 0 0 0 0 0 0 0 1.1541 -1.…	cis-2,8-Menthadien-1-ol	C10 H16 O	152.12	9280686	99
	FALSE	# ACD/Labs04281711072D 11 10 0 0 0 0 0 0 0 0 1 V2000 8.0580 -3.9726 0.0000 O 0 0 0 0 0 0 0 0 0 0 0 0 5.7614 -1.3296 0.0000 C 0 0 0 0 0 0 0 0 0 0 0 0 4.6092 -1.9984 0.0000 C 0 0 0 0 0 0 0 0 0 0 0 0 6.9057 -1.9903 0.0000 C 0 0 0 0 0 0 0 0 0 0 0 0 3.4569 -1.3296 0.0000 C 0 0 0 0 0 0 0 0 0 0 0 0 2.3046 -2.0064 0.0000 C 0 0 0 0 0 0 0 0 0 0 0 0 1.1442 -1.3376 0.0000 C 0 0 0 0 0 0 0 0 0 0 0 0 6.9057 -3.…	neral	C10 H16 O	152.12	558878	98
	FALSE	# ACD/Labs04281711152D 12 13 0 0 1 0 0 0 0 0 1 V2000 4.4295 -0.8383 0.0000 O 0 0 0 0 0 0 0 0 0 0 0 0 2.1417 -3.4019 0.0000 C 0 0 0 0 0 0 0 0 0 0 0 0 1.3305 -2.3472 0.0000 C 0 0 0 0 0 0 0 0 0 0 0 0 0.8275 -3.5857 0.0000 C 0 0 0 0 0 0 0 0 0 0 0 0 2.0984 -1.2547 0.0000 C 0 0 0 0 0 0 0 0 0 0 0 0 3.3965 -2.9692 0.0000 C 0 0 0 0 0 0 0 0 0 0 0 0 2.1309 -4.7377 0.0000 C 0 0 0 0 0 0 0 0 0 0 0 0 3.3694 -1.…	(-)-alpha-Thujone	C10 H16 O	152.12	229574	97
	FALSE	# ACD/Labs04111411492D 11 13 0 0 0 0 0 0 0 0 1 V2000 4.3139 -0.0478 0.0000 C 0 0 0 0 0 0 0 0 0 0 0 0 3.6355 -1.1943 0.0000 C 0 0 0 0 0 0 0 0 0 0 0 0 4.7772 -1.8727 0.0000 O 0 0 0 0 0 0 0 0 0 0 0 0 3.6164 -2.5224 0.0000 C 0 0 0 0 0 0 0 0 0 0 0 0 2.4555 -3.1721 0.0000 C 0 0 0 0 0 0 0 0 0 0 0 0 1.3137 -2.4889 0.0000 C 0 0 0 0 0 0 0 0 0 0 0 0 2.4746 -1.8440 0.0000 C 0 0 0 0 0 0 0 0 0 0 0 0 2.4937 -0.…	α-pinene oxide	C10 H16 O	152.12	82629	93
	FALSE	# ACD/Labs04281711442D 11 11 0 0 1 0 0 0 0 0 1 V2000 3.5205 -1.1424 0.0000 O 0 0 0 0 0 0 0 0 0 0 0 0 1.1716 -3.8702 0.0000 C 0 0 0 0 0 0 0 0 0 0 0 0 2.3548 -1.8185 0.0000 C 0 0 0 0 0 0 0 0 0 0 0 0 1.1716 -1.1424 0.0000 C 0 0 0 0 0 0 0 0 0 0 0 0 2.3548 -3.1824 0.0000 C 0 0 0 0 0 0 0 0 0 0 0 0 0.0058 -3.1824 0.0000 C 0 0 0 0 0 0 0 0 0 0 0 0 0.0058 -1.8185 0.0000 C 0 0 0 0 0 0 0 0 0 0 0 0 1.1716 -5.…	trans-(-)-carveol	C10 H16 O	152.12	85031	78
	FALSE	# ACD/Labs06251410122D 11 11 0 0 0 0 0 0 0 0 1 V2000 5.9839 -4.6076 0.0000 O 0 0 0 0 0 0 0 0 0 0 0 0 5.3197 -3.4587 0.0000 C 0 0 0 0 0 0 0 0 0 0 0 0 5.9839 -2.3038 0.0000 C 0 0 0 0 0 0 0 0 0 0 0 0 5.3197 -1.1549 0.0000 C 0 0 0 0 0 0 0 0 0 0 0 0 5.9839 0.0000 0.0000 C 0 0 0 0 0 0 0 0 0 0 0 0 3.9912 -1.1549 0.0000 C 0 0 0 0 0 0 0 0 0 0 0 0 3.3270 -2.3038 0.0000 C 0 0 0 0 0 0 0 0 0 0 0 0 1.9926 -2.3…	Celery ketone	C10 H16 O	152.12	3010274	76
	FALSE	# ACD/Labs04111411492D 11 12 0 0 0 0 0 0 0 0 1 V2000 2.4151 -1.2650 0.0000 C 0 0 0 0 0 0 0 0 0 0 0 0 1.1500 -1.6750 0.0000 C 0 0 0 0 0 0 0 0 0 0 0 0 2.4151 -3.4151 0.0000 C 0 0 0 0 0 0 0 0 0 0 0 0 3.2001 -2.3401 0.0000 C 0 0 0 0 0 0 0 0 0 0 0 0 1.1500 -3.0051 0.0000 C 0 0 0 0 0 0 0 0 0 0 0 0 0.0000 -2.3401 0.0000 C 0 0 0 0 0 0 0 0 0 0 0 0 2.8251 0.0000 0.0000 C 0 0 0 0 0 0 0 0 0 0 0 0 4.5301 -2.3…	1-Isopropyl-4-methylbicyclo(3.1.0)hexan-3-one	C10 H16 O	152.12	10561	74
	FALSE	# ACD/Labs03221914022D 11 12 0 0 0 0 0 0 0 0 1 V2000 2.7549 -5.2474 0.0000 C 0 0 0 0 0 0 0 0 0 0 0 0 2.2984 -3.9985 0.0000 C 0 0 0 0 0 0 0 0 0 0 0 0 3.6102 -3.7624 0.0000 C 0 0 0 0 0 0 0 0 0 0 0 0 1.1544 -4.6649 0.0000 C 0 0 0 0 0 0 0 0 0 0 0 0 0.0000 -3.9985 0.0000 C 0 0 0 0 0 0 0 0 0 0 0 0 0.0000 -2.6657 0.0000 C 0 0 0 0 0 0 0 0 0 0 0 0 1.1544 -1.9993 0.0000 C 0 0 0 0 0 0 0 0 0 0 0 0 1.1544 -0.…	myrtenol	C10 H16 O	152.12	10137	73
	FALSE	#38621 -OEChem-02070708212D 27 27 0 1 0 0 0 0 0999 V2000 3.7321 2.3660 0.0000 O 0 0 0 0 0 0 0 0 0 0 0 0 3.7321 0.6340 0.0000 C 0 0 3 0 0 0 0 0 0 0 0 0 4.5981 0.1340 0.0000 C 0 0 0 0 0 0 0 0 0 0 0 0 2.8660 0.1340 0.0000 C 0 0 0 0 0 0 0 0 0 0 0 0 4.5981 -0.8660 0.0000 C 0 0 0 0 0 0 0 0 0 0 0 0 2.8660 -0.8660 0.0000 C 0 0 0 0 0 0 0 0 0 0 0 0 3.7321 -1.3660 0.0000 C 0 0 0 0 0 0 0 0 0 0 0 0 3.2321 1.5…	1,3,4-Trimethyl-3-cyclohexene-1-carbaldehyde	C10 H16 O	152.12	35397	70
	FALSE	#61126 -OEChem-02070708212D 27 28 0 1 0 0 0 0 0999 V2000 3.7601 -1.8775 0.0000 O 0 0 0 0 0 0 0 0 0 0 0 0 6.9193 0.1026 0.0000 C 0 0 0 0 0 0 0 0 0 0 0 0 5.0873 0.3438 0.0000 C 0 0 3 0 0 0 0 0 0 0 0 0 5.3461 1.3097 0.0000 C 0 0 3 0 0 0 0 0 0 0 0 0 4.6095 2.2923 0.0000 C 0 0 0 0 0 0 0 0 0 0 0 0 3.5522 -0.8993 0.0000 C 0 0 3 0 0 0 0 0 0 0 0 0 2.7431 0.5019 0.0000 C 0 0 0 0 0 0 0 0 0 0 0 0 7.7853 0.60…	verbenol	C10 H16 O	152.12	55074	65
	FALSE	# ACD/Labs04281713052D 11 11 0 0 1 0 0 0 0 0 1 V2000 3.4525 -1.3283 0.0000 O 0 0 0 0 0 0 0 0 0 0 0 0 1.1488 -3.9910 0.0000 C 0 0 0 0 0 0 0 0 0 0 0 0 2.3037 -1.9925 0.0000 C 0 0 0 0 0 0 0 0 0 0 0 0 1.1488 -1.3283 0.0000 C 0 0 0 0 0 0 0 0 0 0 0 0 2.3037 -3.3269 0.0000 C 0 0 0 0 0 0 0 0 0 0 0 0 0.0000 -3.3269 0.0000 C 0 0 0 0 0 0 0 0 0 0 0 0 0.0000 -1.9925 0.0000 C 0 0 0 0 0 0 0 0 0 0 0 0 1.1488 -5.…	(+)-DIHYDROCARVONE	C10 H16 O	152.12	20869	63
	FALSE	#94143 -OEChem-02070708202D 27 27 0 1 0 0 0 0 0999 V2000 3.0000 1.7500 0.0000 O 0 0 0 0 0 0 0 0 0 0 0 0 3.0000 -0.2500 0.0000 C 0 0 0 0 0 0 0 0 0 0 0 0 3.8660 0.2500 0.0000 C 0 0 3 0 0 0 0 0 0 0 0 0 3.0000 -1.2500 0.0000 C 0 0 0 0 0 0 0 0 0 0 0 0 3.8660 -1.7500 0.0000 C 0 0 0 0 0 0 0 0 0 0 0 0 4.7321 -0.2500 0.0000 C 0 0 0 0 0 0 0 0 0 0 0 0 2.5000 0.6160 0.0000 C 0 0 0 0 0 0 0 0 0 0 0 0 2.0000 -0…	MFCD09751408	C10 H16 O	152.12	84960	61
	FALSE	# CDK 04291007072D 11 11 0 0 0 0 999 V2000 0.0000 2.4750 0.0000 C 0 0 0 0 0 0 0 0 0 0 0 0 0.7145 2.0625 0.0000 C 0 0 0 0 0 0 0 0 0 0 0 0 1.4289 2.4750 0.0000 C 0 0 0 0 0 0 0 0 0 0 0 0 0.7145 1.2375 0.0000 C 0 0 0 0 0 0 0 0 0 0 0 0 1.4289 0.8250 0.0000 C 0 0 0 0 0 0 0 0 0 0 0 0 1.4289 -0.0000 0.0000 C 0 0 0 0 0 0 0 0 0 0 0 0 0.7145 -0.4125 0.0000 C 0 0 0 0 0 0 0 0 0 0 0 0 0.7145 -1.2375 0.0000 C 0…	5-Isopropyl-2-methyl-2-cyclohexen-1-one	C10 H16 O	152.12	454694	60
	FALSE	# ACD/Labs04281713142D 27 28 0 0 1 0 0 0 0 0 1 V2000 0.7152 -5.0724 0.0000 O 0 0 0 0 0 0 0 0 0 0 0 0 7.5475 -3.6138 0.0000 C 0 0 0 0 0 0 0 0 0 0 0 0 5.4583 -2.0139 0.0000 C 0 0 0 0 0 0 0 0 0 0 0 0 5.1195 -3.2938 0.0000 C 0 0 0 0 0 0 0 0 0 0 0 0 4.4796 -0.7058 0.0000 C 0 0 0 0 0 0 0 0 0 0 0 0 2.0045 -3.0868 0.0000 C 0 0 0 0 0 0 0 0 0 0 0 0 3.0773 -4.9407 0.0000 C 0 0 0 0 0 0 0 0 0 0 0 0 1.8633 -4.…	(1R,3S,5R)-6,6-Dimethyl-2-methylenebicyclo[3.1.1]heptan-3-ol	C10 H16 O	152.12	79661	56
	FALSE	# ACD/Labs06161415502D 11 12 0 0 1 0 0 0 0 0 1 V2000 2.3047 -0.4876 0.0000 O 0 0 0 0 0 0 0 0 0 0 0 0 1.1494 -1.1494 0.0000 C 0 0 0 0 0 0 0 0 0 0 0 0 2.3047 -1.8170 0.0000 C 0 0 0 0 0 0 0 0 0 0 0 0 0.0000 -1.8170 0.0000 C 0 0 0 0 0 0 0 0 0 0 0 0 2.3047 -3.1464 0.0000 C 0 0 0 0 0 0 0 0 0 0 0 0 1.1494 -3.8082 0.0000 C 0 0 0 0 0 0 0 0 0 0 0 0 0.0000 -3.1464 0.0000 C 0 0 0 0 0 0 0 0 0 0 0 0 0.4876 0.0…	80231	C10 H16 O	152.12	390018	55
	FALSE	#61665 -OEChem-02070708212D 27 27 0 1 0 0 0 0 0999 V2000 4.5032 -0.2020 0.0000 O 0 0 0 0 0 0 0 0 0 0 0 0 5.3122 0.3858 0.0000 C 0 0 3 0 0 0 0 0 0 0 0 0 5.0032 1.3368 0.0000 C 0 0 0 0 0 0 0 0 0 0 0 0 4.0032 1.3368 0.0000 C 0 0 0 0 0 0 0 0 0 0 0 0 3.6942 0.3858 0.0000 C 0 0 3 0 0 0 0 0 0 0 0 0 6.2633 0.6948 0.0000 C 0 0 0 0 0 0 0 0 0 0 0 0 2.7431 0.0767 0.0000 C 0 0 0 0 0 0 0 0 0 0 0 0 5.9000 -0.42…	2-Methyl-2-vinyl-5-isopropenyltetrahydrofuran	C10 H16 O	152.12	55570	54
	FALSE	# ACD/Labs06251410052D 11 11 0 0 0 0 0 0 0 0 1 V2000 5.9835 0.0000 0.0000 C 0 0 0 0 0 0 0 0 0 0 0 0 5.3194 -1.1548 0.0000 C 0 0 0 0 0 0 0 0 0 0 0 0 5.9835 -2.3037 0.0000 C 0 0 0 0 0 0 0 0 0 0 0 0 3.9910 -1.1548 0.0000 C 0 0 0 0 0 0 0 0 0 0 0 0 3.3269 -2.3037 0.0000 C 0 0 0 0 0 0 0 0 0 0 0 0 1.9925 -2.3037 0.0000 C 0 0 0 0 0 0 0 0 0 0 0 0 1.3283 -3.4585 0.0000 C 0 0 0 0 0 0 0 0 0 0 0 0 0.0000 -3.4…	Neroloxide	C10 H16 O	152.12	55214	51
	FALSE	# ACD/Labs04111411492D 11 11 0 0 0 0 0 0 0 0 1 V2000 0.0000 -1.9925 0.0000 C 0 0 0 0 0 0 0 0 0 0 0 0 0.0000 -3.3269 0.0000 C 0 0 0 0 0 0 0 0 0 0 0 0 2.3037 -1.9925 0.0000 C 0 0 0 0 0 0 0 0 0 0 0 0 1.1488 -1.3283 0.0000 C 0 0 0 0 0 0 0 0 0 0 0 0 1.1488 0.0000 0.0000 C 0 0 0 0 0 0 0 0 0 0 0 0 1.1488 -3.9910 0.0000 C 0 0 0 0 0 0 0 0 0 0 0 0 2.3037 -5.9835 0.0000 C 0 0 0 0 0 0 0 0 0 0 0 0 1.1488 -5.3…	ISOPULEGONE, (-)-	C10 H16 O	152.12	31884	51
	FALSE	#77408 -OEChem-02070708192D 27 27 0 0 0 0 0 0 0999 V2000 2.8090 0.8674 0.0000 O 0 0 0 0 0 0 0 0 0 0 0 0 5.7281 -0.1410 0.0000 C 0 0 0 0 0 0 0 0 0 0 0 0 4.7770 0.1681 0.0000 C 0 0 0 0 0 0 0 0 0 0 0 0 5.9360 -1.1191 0.0000 C 0 0 0 0 0 0 0 0 0 0 0 0 4.5691 1.1462 0.0000 C 0 0 0 0 0 0 0 0 0 0 0 0 6.8870 -1.4281 0.0000 C 0 0 0 0 0 0 0 0 0 0 0 0 3.6180 1.4552 0.0000 C 0 0 0 0 0 0 0 0 0 0 0 0 7.0949 -2.…	2-Hexylfuran	C10 H16 O	152.12	69820	51
	FALSE	# ACD/Labs04281712562D 12 13 0 0 1 0 0 0 0 0 1 V2000 2.4151 -1.2650 0.0000 C 0 0 0 0 0 0 0 0 0 0 0 0 1.1500 -1.6750 0.0000 C 0 0 0 0 0 0 0 0 0 0 0 0 2.4151 -3.4151 0.0000 C 0 0 0 0 0 0 0 0 0 0 0 0 3.2001 -2.3401 0.0000 C 0 0 0 0 0 0 0 0 0 0 0 0 1.1500 -3.0051 0.0000 C 0 0 0 0 0 0 0 0 0 0 0 0 0.0000 -2.3401 0.0000 C 0 0 0 0 0 0 0 0 0 0 0 0 2.8251 0.0000 0.0000 C 0 0 0 0 0 0 0 0 0 0 0 0 4.5301 -2.3…	(-)-beta-thujone	C10 H16 O	152.12	5026861	50
	FALSE	#11038 -OEChem-02070708202D 27 28 0 1 0 0 0 0 0999 V2000 2.0000 -1.2000 0.0000 O 0 0 0 0 0 0 0 0 0 0 0 0 7.1467 -0.1048 0.0000 C 0 0 0 0 0 0 0 0 0 0 0 0 5.3147 0.1364 0.0000 C 0 0 3 0 0 0 0 0 0 0 0 0 5.5735 1.1023 0.0000 C 0 0 3 0 0 0 0 0 0 0 0 0 4.8369 2.0849 0.0000 C 0 0 0 0 0 0 0 0 0 0 0 0 3.7796 -1.1068 0.0000 C 0 0 3 0 0 0 0 0 0 0 0 0 2.9706 0.2945 0.0000 C 0 0 0 0 0 0 0 0 0 0 0 0 2.8660 -0.…	isopinocamphone	C10 H16 O	152.12	10570	50
	FALSE	# ACD/Labs04221415492D 11 12 0 0 0 0 0 0 0 0 1 V2000 0.0000 -1.3085 0.0000 O 0 0 0 0 0 0 0 0 0 0 0 0 3.4325 -3.2807 0.0000 C 0 0 0 0 0 0 0 0 0 0 0 0 3.4325 -1.9675 0.0000 C 0 0 0 0 0 0 0 0 0 0 0 0 2.2994 -3.9350 0.0000 C 0 0 0 0 0 0 0 0 0 0 0 0 2.2994 -1.3085 0.0000 C 0 0 0 0 0 0 0 0 0 0 0 0 2.2851 -2.6218 0.0000 C 0 0 0 0 0 0 0 0 0 0 0 0 1.1378 -1.9580 0.0000 C 0 0 0 0 0 0 0 0 0 0 0 0 1.1663 -3.…	6,6-Dimethyl-2-methylenebicyclo[3.1.1]heptan-3-ol	C10 H16 O	152.12	92735	50
	FALSE	# ACD/Labs06161415502D 11 11 0 0 1 0 0 0 0 0 1 V2000 3.4525 -1.3283 0.0000 O 0 0 0 0 0 0 0 0 0 0 0 0 1.1488 -3.9910 0.0000 C 0 0 0 0 0 0 0 0 0 0 0 0 2.3037 -1.9925 0.0000 C 0 0 0 0 0 0 0 0 0 0 0 0 1.1488 -1.3283 0.0000 C 0 0 0 0 0 0 0 0 0 0 0 0 2.3037 -3.3269 0.0000 C 0 0 0 0 0 0 0 0 0 0 0 0 0.0000 -3.3269 0.0000 C 0 0 0 0 0 0 0 0 0 0 0 0 0.0000 -1.9925 0.0000 C 0 0 0 0 0 0 0 0 0 0 0 0 1.1488 -5.…	(-)-dihydrocarvone	C10 H16 O	152.12	391455	48
	FALSE	# ACD/Labs04281711072D 11 11 0 0 1 0 0 0 0 0 1 V2000 0.0000 -3.9824 0.0000 O 0 0 0 0 0 0 0 0 0 0 0 0 2.2962 -3.9884 0.0000 C 0 0 0 0 0 0 0 0 0 0 0 0 1.1481 -3.3247 0.0000 C 0 0 0 0 0 0 0 0 0 0 0 0 2.2902 -5.3159 0.0000 C 0 0 0 0 0 0 0 0 0 0 0 0 1.1481 -1.9912 0.0000 C 0 0 0 0 0 0 0 0 0 0 0 0 3.4562 -3.3247 0.0000 C 0 0 0 0 0 0 0 0 0 0 0 0 2.2962 -1.3335 0.0000 C 0 0 0 0 0 0 0 0 0 0 0 0 3.4562 -1.…	(+)-Piperitone	C10 H16 O	152.12	55294	47
	FALSE	# ACD/Labs04281711152D 27 27 0 0 1 0 0 0 0 0 1 V2000 3.3940 -0.9196 0.0000 O 0 0 0 0 0 0 0 0 0 0 0 0 2.5313 -2.4080 0.0000 C 0 0 0 0 0 0 0 0 0 0 0 0 1.0523 -3.2708 0.0000 C 0 0 0 0 0 0 0 0 0 0 0 0 1.0523 -4.9867 0.0000 C 0 0 0 0 0 0 0 0 0 0 0 0 2.5313 -5.8400 0.0000 C 0 0 0 0 0 0 0 0 0 0 0 0 4.0197 -3.2708 0.0000 C 0 0 0 0 0 0 0 0 0 0 0 0 4.0197 -4.9867 0.0000 C 0 0 0 0 0 0 0 0 0 0 0 0 1.6780 -0.…	(1R,4R)-4-Isopropenyl-1-methyl-2-cyclohexen-1-ol	C10 H16 O	152.12	99851	46
	FALSE	# ACD/Labs04221415492D 11 13 0 0 1 0 0 0 0 0 1 V2000 3.4671 -0.1899 0.0000 O 0 0 0 0 0 0 0 0 0 0 0 0 2.3073 -0.7883 0.0000 C 0 0 0 0 0 0 0 0 0 0 0 0 1.1557 -1.4570 0.0000 C 0 0 0 0 0 0 0 0 0 0 0 0 3.4712 -1.4570 0.0000 C 0 0 0 0 0 0 0 0 0 0 0 0 1.1557 -2.8026 0.0000 C 0 0 0 0 0 0 0 0 0 0 0 0 2.3073 -3.4795 0.0000 C 0 0 0 0 0 0 0 0 0 0 0 0 2.2825 -2.0968 0.0000 C 0 0 0 0 0 0 0 0 0 0 0 0 3.4712 -2.…	a-Pinene oxide	C10 H16 O	152.12	388853	44
	FALSE	# ACD/Labs04281711292D 13 14 0 0 1 0 0 0 0 0 1 V2000 0.0000 -2.3034 0.0000 O 0 0 0 0 0 0 0 0 0 0 0 0 3.9909 -2.3034 0.0000 C 0 0 0 0 0 0 0 0 0 0 0 0 3.3249 -3.4551 0.0000 C 0 0 0 0 0 0 0 0 0 0 0 0 3.3249 -1.1517 0.0000 C 0 0 0 0 0 0 0 0 0 0 0 0 2.6589 -2.3034 0.0000 C 0 0 0 0 0 0 0 0 0 0 0 0 1.9929 -3.4551 0.0000 C 0 0 0 0 0 0 0 0 0 0 0 0 1.9929 -1.1517 0.0000 C 0 0 0 0 0 0 0 0 0 0 0 0 1.3320 -2.…	5730571	C10 H16 O	152.12	1013323	44
	FALSE	# ACD/Labs04281711152D 12 13 0 0 1 0 0 0 0 0 1 V2000 4.4295 -0.8383 0.0000 O 0 0 0 0 0 0 0 0 0 0 0 0 2.1417 -3.4019 0.0000 C 0 0 0 0 0 0 0 0 0 0 0 0 1.3305 -2.3472 0.0000 C 0 0 0 0 0 0 0 0 0 0 0 0 0.8275 -3.5857 0.0000 C 0 0 0 0 0 0 0 0 0 0 0 0 2.0984 -1.2547 0.0000 C 0 0 0 0 0 0 0 0 0 0 0 0 3.3965 -2.9692 0.0000 C 0 0 0 0 0 0 0 0 0 0 0 0 2.1309 -4.7377 0.0000 C 0 0 0 0 0 0 0 0 0 0 0 0 3.3694 -1.…	(+)-beta-thujone	C10 H16 O	152.12	82583	42
	FALSE	# ACD/Labs04281711152D 11 11 0 0 1 0 0 0 0 0 1 V2000 3.4744 -4.0094 0.0000 O 0 0 0 0 0 0 0 0 0 0 0 0 1.1361 -4.0094 0.0000 C 0 0 0 0 0 0 0 0 0 0 0 0 2.2722 -3.3421 0.0000 C 0 0 0 0 0 0 0 0 0 0 0 0 2.2722 -2.0017 0.0000 C 0 0 0 0 0 0 0 0 0 0 0 0 1.1361 -5.3438 0.0000 C 0 0 0 0 0 0 0 0 0 0 0 0 0.0000 -3.3421 0.0000 C 0 0 0 0 0 0 0 0 0 0 0 0 1.1361 -1.3345 0.0000 C 0 0 0 0 0 0 0 0 0 0 0 0 0.0000 -2.…	S-(-)-Pulegone	C10 H16 O	152.12	553579	41
	FALSE	#520440 -OEChem-02070708272D 27 27 0 1 0 0 0 0 0999 V2000 4.5981 1.4400 0.0000 O 0 0 0 0 0 0 0 0 0 0 0 0 2.8660 0.4400 0.0000 C 0 0 3 0 0 0 0 0 0 0 0 0 3.7321 -0.0600 0.0000 C 0 0 0 0 0 0 0 0 0 0 0 0 2.0000 -0.0600 0.0000 C 0 0 0 0 0 0 0 0 0 0 0 0 2.8660 1.4400 0.0000 C 0 0 3 0 0 0 0 0 0 0 0 0 3.7321 -1.0600 0.0000 C 0 0 0 0 0 0 0 0 0 0 0 0 2.8660 -1.5600 0.0000 C 0 0 0 0 0 0 0 0 0 0 0 0 2.0000 -…	25OS1Y59MM	C10 H16 O	152.12	453972	40
	FALSE	# ACD/Labs04281711332D 11 11 0 0 1 0 0 0 0 0 1 V2000 3.4539 -1.3289 0.0000 O 0 0 0 0 0 0 0 0 0 0 0 0 1.1553 -3.9927 0.0000 C 0 0 0 0 0 0 0 0 0 0 0 0 2.3046 -1.9933 0.0000 C 0 0 0 0 0 0 0 0 0 0 0 0 1.1553 -1.3289 0.0000 C 0 0 0 0 0 0 0 0 0 0 0 0 2.3046 -3.3222 0.0000 C 0 0 0 0 0 0 0 0 0 0 0 0 0.0000 -3.3222 0.0000 C 0 0 0 0 0 0 0 0 0 0 0 0 0.0000 -1.9933 0.0000 C 0 0 0 0 0 0 0 0 0 0 0 0 1.1553 -5.…	(−)-cis-carveol	C10 H16 O	152.12	292842	39
	FALSE	#89488 -OEChem-02070708202D 27 27 0 1 0 0 0 0 0999 V2000 3.7321 -2.5000 0.0000 O 0 0 0 0 0 0 0 0 0 0 0 0 2.8660 1.0000 0.0000 C 0 0 3 0 0 0 0 0 0 0 0 0 2.8660 2.0000 0.0000 C 0 0 0 0 0 0 0 0 0 0 0 0 3.7321 0.5000 0.0000 C 0 0 0 0 0 0 0 0 0 0 0 0 2.0000 0.5000 0.0000 C 0 0 0 0 0 0 0 0 0 0 0 0 3.7321 -0.5000 0.0000 C 0 0 0 0 0 0 0 0 0 0 0 0 2.0000 -0.5000 0.0000 C 0 0 0 0 0 0 0 0 0 0 0 0 2.8660 -1.…	phellandral	C10 H16 O	152.12	80763	38
	FALSE	#101150 -OEChem-02070708192D 27 27 0 1 0 0 0 0 0999 V2000 2.8660 2.2500 0.0000 O 0 0 0 0 0 0 0 0 0 0 0 0 4.5981 0.2500 0.0000 C 0 0 3 0 0 0 0 0 0 0 0 0 3.7321 0.7500 0.0000 C 0 0 3 0 0 0 0 0 0 0 0 0 2.8660 0.2500 0.0000 C 0 0 3 0 0 0 0 0 0 0 0 0 4.5981 -0.7500 0.0000 C 0 0 0 0 0 0 0 0 0 0 0 0 3.7321 -1.2500 0.0000 C 0 0 0 0 0 0 0 0 0 0 0 0 2.8660 -0.7500 0.0000 C 0 0 0 0 0 0 0 0 0 0 0 0 5.4641 0.…	UNII:3RP77Q40LC	C10 H16 O	152.12	91388	37
	FALSE	#65289 -OEChem-02070708212D 27 27 0 1 0 0 0 0 0999 V2000 2.8660 2.3660 0.0000 O 0 0 0 0 0 0 0 0 0 0 0 0 2.8660 0.6340 0.0000 C 0 0 3 0 0 0 0 0 0 0 0 0 2.0000 0.1340 0.0000 C 0 0 0 0 0 0 0 0 0 0 0 0 3.7321 0.1340 0.0000 C 0 0 0 0 0 0 0 0 0 0 0 0 2.0000 -0.8660 0.0000 C 0 0 0 0 0 0 0 0 0 0 0 0 2.3660 1.5000 0.0000 C 0 0 0 0 0 0 0 0 0 0 0 0 2.8660 -1.3660 0.0000 C 0 0 0 0 0 0 0 0 0 0 0 0 3.7321 -0.8…	4-Acetyl-1,4-dimethyl-1-cyclohexene	C10 H16 O	152.12	58780	36
	FALSE	# ACD/Labs04281711212D 11 11 0 0 1 0 0 0 0 0 1 V2000 3.4525 -1.9925 0.0000 C 0 0 0 0 0 0 0 0 0 0 0 0 3.4525 -3.3269 0.0000 C 0 0 0 0 0 0 0 0 0 0 0 0 2.3037 -1.3283 0.0000 C 0 0 0 0 0 0 0 0 0 0 0 0 2.3037 -3.9910 0.0000 C 0 0 0 0 0 0 0 0 0 0 0 0 1.1488 -1.9925 0.0000 C 0 0 0 0 0 0 0 0 0 0 0 0 1.1488 -3.3269 0.0000 C 0 0 0 0 0 0 0 0 0 0 0 0 2.3037 -5.3194 0.0000 C 0 0 0 0 0 0 0 0 0 0 0 0 1.1488 -5.…	(-)-Piperitone	C10 H16 O	152.12	96775	36
	FALSE	#11788398 -OEChem-02070712402D 27 27 0 1 0 0 0 0 0999 V2000 2.0000 -2.1900 0.0000 O 0 0 0 0 0 0 0 0 0 0 0 0 2.8660 1.3100 0.0000 C 0 0 2 0 0 0 0 0 0 0 0 0 3.7321 0.8100 0.0000 C 0 0 0 0 0 0 0 0 0 0 0 0 2.0000 0.8100 0.0000 C 0 0 0 0 0 0 0 0 0 0 0 0 3.7321 -0.1900 0.0000 C 0 0 0 0 0 0 0 0 0 0 0 0 2.8660 -0.6900 0.0000 C 0 0 0 0 0 0 0 0 0 0 0 0 2.0000 -0.1900 0.0000 C 0 0 0 0 0 0 0 0 0 0 0 0 2.8660…	(+)-PERILLYL ALCOHOL TERPENE	C10 H16 O	152.12	9963072	35
	FALSE	#527143 -OEChem-02070708252D 27 27 0 1 0 0 0 0 0999 V2000 3.7321 2.5950 0.0000 O 0 0 0 0 0 0 0 0 0 0 0 0 2.8660 0.0950 0.0000 C 0 0 3 0 0 0 0 0 0 0 0 0 3.7321 -0.4050 0.0000 C 0 0 0 0 0 0 0 0 0 0 0 0 2.0000 -0.4050 0.0000 C 0 0 0 0 0 0 0 0 0 0 0 0 3.7321 -1.4050 0.0000 C 0 0 0 0 0 0 0 0 0 0 0 0 2.8660 -1.9050 0.0000 C 0 0 0 0 0 0 0 0 0 0 0 0 2.8660 1.0950 0.0000 C 0 0 0 0 0 0 0 0 0 0 0 0 2.0000 -…	LIMONEN-10-OL, (+)-	C10 H16 O	152.12	459498	31
	FALSE	#527428 -OEChem-02070708262D 27 27 0 1 0 0 0 0 0999 V2000 2.6200 1.5000 0.0000 O 0 0 0 0 0 0 0 0 0 0 0 0 3.1200 0.6340 0.0000 C 0 0 3 0 0 0 0 0 0 0 0 0 3.9860 0.1340 0.0000 C 0 0 0 0 0 0 0 0 0 0 0 0 2.2540 0.1340 0.0000 C 0 0 0 0 0 0 0 0 0 0 0 0 3.9860 -0.8660 0.0000 C 0 0 0 0 0 0 0 0 0 0 0 0 3.1200 -1.3660 0.0000 C 0 0 0 0 0 0 0 0 0 0 0 0 3.6200 1.5000 0.0000 C 0 0 0 0 0 0 0 0 0 0 0 0 2.2540 -0.…	1,8-Menthadien-4-ol	C10 H16 O	152.12	459676	29
	FALSE	# ACD/Labs04221415492D 11 11 0 0 1 0 0 0 0 0 1 V2000 3.4539 -1.3289 0.0000 O 0 0 0 0 0 0 0 0 0 0 0 0 1.1553 -3.9927 0.0000 C 0 0 0 0 0 0 0 0 0 0 0 0 2.3046 -1.9933 0.0000 C 0 0 0 0 0 0 0 0 0 0 0 0 1.1553 -1.3289 0.0000 C 0 0 0 0 0 0 0 0 0 0 0 0 2.3046 -3.3222 0.0000 C 0 0 0 0 0 0 0 0 0 0 0 0 0.0000 -3.3222 0.0000 C 0 0 0 0 0 0 0 0 0 0 0 0 0.0000 -1.9933 0.0000 C 0 0 0 0 0 0 0 0 0 0 0 0 1.1553 -5.…	Carveol	C10 H16 O	152.12	391450	28
	FALSE	#6427087 -OEChem-02070710332D 27 26 0 0 0 0 0 0 0999 V2000 2.5369 0.4400 0.0000 O 0 0 0 0 0 0 0 0 0 0 0 0 6.8671 -1.0600 0.0000 C 0 0 0 0 0 0 0 0 0 0 0 0 6.8671 -0.0600 0.0000 C 0 0 0 0 0 0 0 0 0 0 0 0 7.7331 -1.5600 0.0000 C 0 0 0 0 0 0 0 0 0 0 0 0 6.0010 0.4400 0.0000 C 0 0 0 0 0 0 0 0 0 0 0 0 7.7331 -2.5600 0.0000 C 0 0 0 0 0 0 0 0 0 0 0 0 6.0010 1.4400 0.0000 C 0 0 0 0 0 0 0 0 0 0 0 0 5.1350 …	(2E,4Z)-2,4-Decadienal	C10 H16 O	152.12	4932505	26
	FALSE	#6428928 -OEChem-02070710332D 27 26 0 0 0 0 0 0 0999 V2000 2.5369 -1.0600 0.0000 O 0 0 0 0 0 0 0 0 0 0 0 0 6.0010 -0.0600 0.0000 C 0 0 0 0 0 0 0 0 0 0 0 0 4.2690 -0.0600 0.0000 C 0 0 0 0 0 0 0 0 0 0 0 0 5.1350 0.4400 0.0000 C 0 0 0 0 0 0 0 0 0 0 0 0 6.8671 0.4400 0.0000 C 0 0 0 0 0 0 0 0 0 0 0 0 3.4030 0.4400 0.0000 C 0 0 0 0 0 0 0 0 0 0 0 0 7.7331 -0.0600 0.0000 C 0 0 0 0 0 0 0 0 0 0 0 0 4.2690 …	(E)-isocitral	C10 H16 O	152.12	4934306	24
	FALSE	# ACD/Labs04281711152D 11 11 0 0 1 0 0 0 0 0 1 V2000 3.4501 -1.3214 0.0000 O 0 0 0 0 0 0 0 0 0 0 0 0 1.1540 -3.9882 0.0000 C 0 0 0 0 0 0 0 0 0 0 0 0 2.3080 -1.9851 0.0000 C 0 0 0 0 0 0 0 0 0 0 0 0 1.1540 -1.3214 0.0000 C 0 0 0 0 0 0 0 0 0 0 0 0 2.3080 -3.3185 0.0000 C 0 0 0 0 0 0 0 0 0 0 0 0 0.0000 -3.3185 0.0000 C 0 0 0 0 0 0 0 0 0 0 0 0 0.0000 -1.9851 0.0000 C 0 0 0 0 0 0 0 0 0 0 0 0 1.1600 -5.…	2L4HMW8YQM	C10 H16 O	152.12	391439	23
	FALSE	#527427 -OEChem-02070708262D 27 27 0 1 0 0 0 0 0999 V2000 2.5369 -1.2500 0.0000 O 0 0 0 0 0 0 0 0 0 0 0 0 4.2690 0.7500 0.0000 C 0 0 3 0 0 0 0 0 0 0 0 0 3.4030 0.2500 0.0000 C 0 0 0 0 0 0 0 0 0 0 0 0 5.1350 0.2500 0.0000 C 0 0 0 0 0 0 0 0 0 0 0 0 3.4030 -0.7500 0.0000 C 0 0 3 0 0 0 0 0 0 0 0 0 5.1350 -0.7500 0.0000 C 0 0 0 0 0 0 0 0 0 0 0 0 4.2690 -1.2500 0.0000 C 0 0 0 0 0 0 0 0 0 0 0 0 4.2690 1…	5-Isopropenyl-2-methylenecyclohexanol	C10 H16 O	152.12	459675	22
	FALSE	# ACD/Labs04221415492D 11 11 0 0 1 0 0 0 0 0 1 V2000 3.4564 -1.3298 0.0000 O 0 0 0 0 0 0 0 0 0 0 0 0 1.1561 -3.9955 0.0000 C 0 0 0 0 0 0 0 0 0 0 0 0 2.3002 -1.9947 0.0000 C 0 0 0 0 0 0 0 0 0 0 0 0 1.1561 -1.3298 0.0000 C 0 0 0 0 0 0 0 0 0 0 0 0 2.3002 -3.3246 0.0000 C 0 0 0 0 0 0 0 0 0 0 0 0 0.0000 -3.3246 0.0000 C 0 0 0 0 0 0 0 0 0 0 0 0 0.0000 -1.9947 0.0000 C 0 0 0 0 0 0 0 0 0 0 0 0 1.1561 -5.…	(+)-cis-carveol	C10 H16 O	152.12	391449	22
	FALSE	# ACD/Labs06161415502D 11 12 0 0 1 0 0 0 0 0 1 V2000 2.3047 -0.4876 0.0000 O 0 0 0 0 0 0 0 0 0 0 0 0 1.1494 -1.1494 0.0000 C 0 0 0 0 0 0 0 0 0 0 0 0 2.3047 -1.8170 0.0000 C 0 0 0 0 0 0 0 0 0 0 0 0 0.0000 -1.8170 0.0000 C 0 0 0 0 0 0 0 0 0 0 0 0 2.3047 -3.1464 0.0000 C 0 0 0 0 0 0 0 0 0 0 0 0 1.1494 -3.8082 0.0000 C 0 0 0 0 0 0 0 0 0 0 0 0 0.0000 -3.1464 0.0000 C 0 0 0 0 0 0 0 0 0 0 0 0 0.4876 0.0…	(4S)-Limonene-1,2-epoxide	C10 H16 O	152.12	9128935	22
	FALSE	#6437002 -OEChem-02070710342D 27 27 0 1 0 0 0 0 0999 V2000 2.0000 -1.5093 0.0000 O 0 0 0 0 0 0 0 0 0 0 0 0 3.7601 -1.2306 0.0000 C 0 0 3 0 0 0 0 0 0 0 0 0 4.5691 -1.8184 0.0000 C 0 0 0 0 0 0 0 0 0 0 0 0 4.2601 -2.7694 0.0000 C 0 0 0 0 0 0 0 0 0 0 0 0 3.2601 -2.7694 0.0000 C 0 0 0 0 0 0 0 0 0 0 0 0 2.9511 -1.8184 0.0000 C 0 0 0 0 0 0 0 0 0 0 0 0 3.7601 -0.2306 0.0000 C 0 0 0 0 0 0 0 0 0 0 0 0 4.62…	JASMINONE B	C10 H16 O	152.12	4941595	20
	FALSE	# ACD/Labs04281713142D 12 13 0 0 1 0 0 0 0 0 1 V2000 0.0000 -1.2682 0.0000 O 0 0 0 0 0 0 0 0 0 0 0 0 2.2235 -3.8486 0.0000 C 0 0 0 0 0 0 0 0 0 0 0 0 3.3326 -1.9216 0.0000 C 0 0 0 0 0 0 0 0 0 0 0 0 3.3326 -3.2008 0.0000 C 0 0 0 0 0 0 0 0 0 0 0 0 2.2235 -1.2847 0.0000 C 0 0 0 0 0 0 0 0 0 0 0 0 1.1145 -3.2008 0.0000 C 0 0 0 0 0 0 0 0 0 0 0 0 2.2016 -4.8259 0.0000 C 0 0 0 0 0 0 0 0 0 0 0 0 1.1145 -1.…	(+)-cis-sabinol	C10 H16 O	152.12	84964	20
	FALSE	# ACD/Labs06161415502D 11 11 0 0 1 0 0 0 0 0 1 V2000 3.4525 -1.3283 0.0000 O 0 0 0 0 0 0 0 0 0 0 0 0 1.1488 -3.9910 0.0000 C 0 0 0 0 0 0 0 0 0 0 0 0 2.3037 -1.9925 0.0000 C 0 0 0 0 0 0 0 0 0 0 0 0 1.1488 -1.3283 0.0000 C 0 0 0 0 0 0 0 0 0 0 0 0 2.3037 -3.3269 0.0000 C 0 0 0 0 0 0 0 0 0 0 0 0 0.0000 -3.3269 0.0000 C 0 0 0 0 0 0 0 0 0 0 0 0 0.0000 -1.9925 0.0000 C 0 0 0 0 0 0 0 0 0 0 0 0 1.1488 -5.…	cis-dihydrocarvone	C10 H16 O	152.12	391453	19
	FALSE	# ACD/Labs04221415492D 11 12 0 0 1 0 0 0 0 0 1 V2000 0.0000 -2.1208 0.0000 O 0 0 0 0 0 0 0 0 0 0 0 0 2.2283 -1.9059 0.0000 C 0 0 0 0 0 0 0 0 0 0 0 0 2.8112 -0.8434 0.0000 C 0 0 0 0 0 0 0 0 0 0 0 0 2.8112 -2.8898 0.0000 C 0 0 0 0 0 0 0 0 0 0 0 0 1.1245 -2.4888 0.0000 C 0 0 0 0 0 0 0 0 0 0 0 0 3.5099 -2.1291 0.0000 C 0 0 0 0 0 0 0 0 0 0 0 0 1.7074 -3.7001 0.0000 C 0 0 0 0 0 0 0 0 0 0 0 0 4.1342 -3.…	(1R,4S)-1,7,7-Trimethylbicyclo[2.2.1]heptan-2-one	C10 H16 O	152.12	29305344	19
	FALSE	#102684 -OEChem-02070708192D 27 27 0 1 0 0 0 0 0999 V2000 3.6372 1.5194 0.0000 O 0 0 0 0 0 0 0 0 0 0 0 0 4.5032 0.0194 0.0000 C 0 0 3 0 0 0 0 0 0 0 0 0 5.3122 -0.5684 0.0000 C 0 0 3 0 0 0 0 0 0 0 0 0 3.6942 -0.5684 0.0000 C 0 0 3 0 0 0 0 0 0 0 0 0 5.0032 -1.5194 0.0000 C 0 0 0 0 0 0 0 0 0 0 0 0 4.0032 -1.5194 0.0000 C 0 0 0 0 0 0 0 0 0 0 0 0 6.2633 -0.2593 0.0000 C 0 0 0 0 0 0 0 0 0 0 0 0 2.7431 …	2-Isopropenyl-5-methylcyclopentanecarbaldehyde	C10 H16 O	152.12	92751	19
	FALSE	#5319723 -OEChem-02070710142D 27 26 0 0 0 0 0 0 0999 V2000 8.9282 0.0600 0.0000 O 0 0 0 0 0 0 0 0 0 0 0 0 5.4641 0.0600 0.0000 C 0 0 0 0 0 0 0 0 0 0 0 0 4.5981 -0.4400 0.0000 C 0 0 0 0 0 0 0 0 0 0 0 0 6.3301 -0.4400 0.0000 C 0 0 0 0 0 0 0 0 0 0 0 0 7.1962 0.0600 0.0000 C 0 0 0 0 0 0 0 0 0 0 0 0 3.7321 0.0600 0.0000 C 0 0 0 0 0 0 0 0 0 0 0 0 8.0622 -0.4400 0.0000 C 0 0 0 0 0 0 0 0 0 0 0 0 7.1962 1…	2-Methyl-6-methylene-2,7-octadienol	C10 H16 O	152.12	4477959	18
	FALSE	# ACD/Labs04221415492D 11 11 0 0 1 0 0 0 0 0 1 V2000 3.4539 -3.9867 0.0000 O 0 0 0 0 0 0 0 0 0 0 0 0 1.1553 -3.9926 0.0000 C 0 0 0 0 0 0 0 0 0 0 0 0 2.3046 -3.3282 0.0000 C 0 0 0 0 0 0 0 0 0 0 0 0 1.1613 -5.3215 0.0000 C 0 0 0 0 0 0 0 0 0 0 0 0 2.3046 -1.9933 0.0000 C 0 0 0 0 0 0 0 0 0 0 0 0 0.0000 -3.3282 0.0000 C 0 0 0 0 0 0 0 0 0 0 0 0 1.1553 -1.3349 0.0000 C 0 0 0 0 0 0 0 0 0 0 0 0 0.0000 -1.…	(-)-trans-Isopiperitenol	C10 H16 O	152.12	388526	18
	FALSE	#101153 -OEChem-02070708192D 27 28 0 1 0 0 0 0 0999 V2000 7.1781 0.1095 0.0000 O 0 0 0 0 0 0 0 0 0 0 0 0 5.0873 -0.0976 0.0000 C 0 0 3 0 0 0 0 0 0 0 0 0 6.9193 -0.8564 0.0000 C 0 0 0 0 0 0 0 0 0 0 0 0 4.6095 1.8509 0.0000 C 0 0 0 0 0 0 0 0 0 0 0 0 5.3461 0.8683 0.0000 C 0 0 3 0 0 0 0 0 0 0 0 0 3.5522 -1.3407 0.0000 C 0 0 0 0 0 0 0 0 0 0 0 0 2.7431 0.0605 0.0000 C 0 0 0 0 0 0 0 0 0 0 0 0 6.8147 -1…	p-Menth-1-ene, 6,8-epoxy-	C10 H16 O	152.12	91391	18
	FALSE	#636475 -OEChem-02070708282D 27 28 0 1 0 0 0 0 0999 V2000 2.3783 -2.1163 0.0000 O 0 0 0 0 0 0 0 0 0 0 0 0 6.2807 0.5330 0.0000 C 0 0 0 0 0 0 0 0 0 0 0 0 4.7075 1.7401 0.0000 C 0 0 1 0 0 0 0 0 0 0 0 0 4.4487 0.7742 0.0000 C 0 0 2 0 0 0 0 0 0 0 0 0 3.9709 2.7227 0.0000 C 0 0 0 0 0 0 0 0 0 0 0 0 2.1045 0.9323 0.0000 C 0 0 0 0 0 0 0 0 0 0 0 0 2.9135 -0.4690 0.0000 C 0 0 0 0 0 0 0 0 0 0 0 0 7.1467 1.0…	(1S)-(+)-Myrtenol	C10 H16 O	152.12	552247	18
	FALSE	# ACD/Labs04221415492D 11 10 0 0 0 0 0 0 0 0 1 V2000 0.0231 0.0000 0.0000 O 0 0 0 0 0 0 0 0 0 0 0 0 4.6282 -2.7248 0.0000 C 0 0 0 0 0 0 0 0 0 0 0 0 4.6108 -4.0612 0.0000 C 0 0 0 0 0 0 0 0 0 0 0 0 3.4769 -2.0422 0.0000 C 0 0 0 0 0 0 0 0 0 0 0 0 1.1570 -2.0190 0.0000 C 0 0 0 0 0 0 0 0 0 0 0 0 2.3083 -2.7017 0.0000 C 0 0 0 0 0 0 0 0 0 0 0 0 1.1050 -0.6827 0.0000 C 0 0 0 0 0 0 0 0 0 0 0 0 5.7852 -2.0…	(Z)-2,6-Dimethyl-5-methylene-2-heptenal	C10 H16 O	152.12	4444272	18
	FALSE	MolHeader ELEMENTL11211614532D Dotmatics Elemental 13 14 0 0 1 0 999 V2000 1.0000 -0.0013 0.0000 O 0 0 0 0 0 -2.0170 0.0000 0.0000 C 0 0 0 0 0 -1.5099 0.8740 0.0000 C 0 0 0 0 0 -1.5099 -0.8686 0.0000 C 0 0 0 0 0 -1.0108 0.0075 0.0000 C 0 0 0 0 0 -0.5015 0.8740 0.0000 C 0 0 0 0 0 -0.5015 -0.8686 0.0000 C 0 0 0 0 0 0.0000 0.0000 0.0000 C 0 0 0 0 0 -2.7814 -0.6447 0.0000 C 0 0 0 0 0 -2.7832 0.6426 0…	(E)-3-pinanone	C10 H16 O	152.12	4932523	17
	FALSE	#523035 -OEChem-02070708272D 27 28 0 1 0 0 0 0 0999 V2000 3.2543 0.6743 0.0000 O 0 0 0 0 0 0 0 0 0 0 0 0 4.4909 -0.1743 0.0000 C 0 0 3 0 0 0 0 0 0 0 0 0 4.1203 1.1743 0.0000 C 0 0 0 0 0 0 0 0 0 0 0 0 4.2321 -1.1402 0.0000 C 0 0 3 0 0 0 0 0 0 0 0 0 6.3228 -0.9331 0.0000 C 0 0 0 0 0 0 0 0 0 0 0 0 6.0640 -1.8991 0.0000 C 0 0 0 0 0 0 0 0 0 0 0 0 2.0000 -1.2742 0.0000 C 0 0 0 0 0 0 0 0 0 0 0 0 2.5000 …	Dehydro-1,8-cineole	C10 H16 O	152.12	456244	17
	FALSE	# ACD/Labs04221415492D 11 10 0 0 0 0 0 0 0 0 1 V2000 2.3045 0.0000 0.0000 O 0 0 0 0 0 0 0 0 0 0 0 0 1.1656 -4.6622 0.0000 C 0 0 0 0 0 0 0 0 0 0 0 0 1.1589 -5.9943 0.0000 C 0 0 0 0 0 0 0 0 0 0 0 0 0.0133 -4.0028 0.0000 C 0 0 0 0 0 0 0 0 0 0 0 0 1.1656 -2.0047 0.0000 C 0 0 0 0 0 0 0 0 0 0 0 0 0.0133 -2.6708 0.0000 C 0 0 0 0 0 0 0 0 0 0 0 0 1.1589 -0.6727 0.0000 C 0 0 0 0 0 0 0 0 0 0 0 0 2.3178 -4.0…	(E)-2,6-Dimethyl-5-methylene-2-heptenal	C10 H16 O	152.12	4445253	16
	FALSE	#107303 -OEChem-02070708202D 27 28 0 1 0 0 0 0 0999 V2000 2.3660 -1.4330 0.0000 O 0 0 0 0 0 0 0 0 0 0 0 0 2.8660 -0.5670 0.0000 C 0 0 3 0 0 0 0 0 0 0 0 0 3.3660 -1.4330 0.0000 C 0 0 0 0 0 0 0 0 0 0 0 0 2.0000 -0.0670 0.0000 C 0 0 0 0 0 0 0 0 0 0 0 0 3.7321 -0.0670 0.0000 C 0 0 0 0 0 0 0 0 0 0 0 0 4.2321 -0.9330 0.0000 C 0 0 0 0 0 0 0 0 0 0 0 0 3.3660 -2.4330 0.0000 C 0 0 0 0 0 0 0 0 0 0 0 0 2.000…	2,2,6-Trimethyl-1-oxaspiro(2.5)oct-5-ene	C10 H16 O	152.12	96568	15
	FALSE	# ACLJDraw11211413122D 13 14 0 0 1 0 0 0 0 0999 V2000 -1.5099 0.8740 0.0000 C 0 0 0 0 0 0 0 0 0 0 0 0 -0.5015 0.8740 0.0000 C 0 0 0 0 0 0 0 0 0 0 0 0 0.0000 0.0000 0.0000 C 0 0 0 0 0 0 0 0 0 0 0 0 -0.5015 -0.8686 0.0000 C 0 0 0 0 0 0 0 0 0 0 0 0 -1.5099 -0.8686 0.0000 C 0 0 0 0 0 0 0 0 0 0 0 0 -2.0170 0.0000 0.0000 C 0 0 0 0 0 0 0 0 0 0 0 0 -1.0108 0.0075 0.0000 C 0 0 0 0 0 0 0 0 0 0 0 0 1.0000 0…	isopinocamphone	C10 H16 O	152.12	19953543	15
	FALSE	#6432475 -OEChem-02070710342D 27 27 0 1 0 0 0 0 0999 V2000 2.0000 -1.2500 0.0000 O 0 0 0 0 0 0 0 0 0 0 0 0 3.7321 0.7500 0.0000 C 0 0 2 0 0 0 0 0 0 0 0 0 3.7321 1.7500 0.0000 C 0 0 0 0 0 0 0 0 0 0 0 0 2.8660 0.2500 0.0000 C 0 0 0 0 0 0 0 0 0 0 0 0 4.5981 0.2500 0.0000 C 0 0 0 0 0 0 0 0 0 0 0 0 2.8660 -0.7500 0.0000 C 0 0 0 0 0 0 0 0 0 0 0 0 4.5981 -0.7500 0.0000 C 0 0 0 0 0 0 0 0 0 0 0 0 2.8660 2…	(5S)-5-Isopropyl-2-methyl-2-cyclohexen-1-one	C10 H16 O	152.12	4937720	14
	FALSE	#578221 -OEChem-02070708262D 27 29 0 1 0 0 0 0 0999 V2000 5.9891 -0.5161 0.0000 O 0 0 0 0 0 0 0 0 0 0 0 0 2.8802 0.0048 0.0000 C 0 0 0 0 0 0 0 0 0 0 0 0 3.2688 1.1980 0.0000 C 0 0 3 0 0 0 0 0 0 0 0 0 3.4542 0.4249 0.0000 C 0 0 3 0 0 0 0 0 0 0 0 0 4.2630 -0.3736 0.0000 C 0 0 3 0 0 0 0 0 0 0 0 0 4.9646 0.5876 0.0000 C 0 0 0 0 0 0 0 0 0 0 0 0 4.2630 1.3313 0.0000 C 0 0 0 0 0 0 0 0 0 0 0 0 4.1049 0.2…	(2,3-Dimethyltricyclo[2.2.1.0~2,6~]hept-3-yl)methanol	C10 H16 O	152.12	502617	13
	FALSE	#5319361 -OEChem-02070710142D 27 27 0 1 0 0 0 0 0999 V2000 2.5369 -1.2500 0.0000 O 0 0 0 0 0 0 0 0 0 0 0 0 4.2690 0.7500 0.0000 C 0 0 3 0 0 0 0 0 0 0 0 0 4.2690 1.7500 0.0000 C 0 0 0 0 0 0 0 0 0 0 0 0 3.4030 0.2500 0.0000 C 0 0 0 0 0 0 0 0 0 0 0 0 3.4030 -0.7500 0.0000 C 0 0 3 0 0 0 0 0 0 0 0 0 5.1350 0.2500 0.0000 C 0 0 0 0 0 0 0 0 0 0 0 0 4.2690 -1.2500 0.0000 C 0 0 0 0 0 0 0 0 0 0 0 0 5.1350 2…	5-Isopropyl-2-methylene-3-cyclohexen-1-ol	C10 H16 O	152.12	4477670	12
	FALSE	#556518 -OEChem-02070708262D 27 28 0 1 0 0 0 0 0999 V2000 2.2212 -0.0024 0.0000 O 0 0 0 0 0 0 0 0 0 0 0 0 3.7601 0.4976 0.0000 C 0 0 3 0 0 0 0 0 0 0 0 0 3.7601 -0.5024 0.0000 C 0 0 3 0 0 0 0 0 0 0 0 0 2.8090 0.8066 0.0000 C 0 0 0 0 0 0 0 0 0 0 0 0 4.7063 0.8023 0.0000 C 0 0 0 0 0 0 0 0 0 0 0 0 2.8090 -0.8114 0.0000 C 0 0 0 0 0 0 0 0 0 0 0 0 4.7063 -0.8071 0.0000 C 0 0 0 0 0 0 0 0 0 0 0 0 5.2899 -…	1,1-Dimethyl-4-methylenehexahydro-1H-cyclopenta[c]furan	C10 H16 O	152.12	483800	11
	FALSE	# ACD/Labs04221415492D 11 11 0 0 1 0 0 0 0 0 1 V2000 3.4316 -3.9711 0.0000 O 0 0 0 0 0 0 0 0 0 0 0 0 1.1519 -3.9711 0.0000 C 0 0 0 0 0 0 0 0 0 0 0 0 2.2917 -3.3103 0.0000 C 0 0 0 0 0 0 0 0 0 0 0 0 2.2917 -1.9825 0.0000 C 0 0 0 0 0 0 0 0 0 0 0 0 1.1337 -5.2928 0.0000 C 0 0 0 0 0 0 0 0 0 0 0 0 0.0000 -3.3103 0.0000 C 0 0 0 0 0 0 0 0 0 0 0 0 1.1519 -1.3217 0.0000 C 0 0 0 0 0 0 0 0 0 0 0 0 0.0000 -1.…	(+)-cis-isopulegone	C10 H16 O	152.12	391736	11
	FALSE	# ACD/Labs08121512342D 11 11 0 0 0 0 0 0 0 0 1 V2000 1.1488 0.0000 0.0000 C 0 0 0 0 0 0 0 0 0 0 0 0 3.4525 0.0000 0.0000 C 0 0 0 0 0 0 0 0 0 0 0 0 2.3037 -5.9835 0.0000 C 0 0 0 0 0 0 0 0 0 0 0 0 3.4525 -3.9910 0.0000 C 0 0 0 0 0 0 0 0 0 0 0 0 3.4525 -2.6567 0.0000 C 0 0 0 0 0 0 0 0 0 0 0 0 1.1488 -3.9910 0.0000 C 0 0 0 0 0 0 0 0 0 0 0 0 2.3037 -0.6642 0.0000 C 0 0 0 0 0 0 0 0 0 0 0 0 2.3037 -4.65…	6-Isopropenyl-3-methyl-3-cyclohexen-1-ol	C10 H16 O	152.12	35013776	9
	FALSE	#11051859 -OEChem-02070712222D 27 27 0 1 0 0 0 0 0999 V2000 5.1213 1.4483 0.0000 O 0 0 0 0 0 0 0 0 0 0 0 0 3.0000 -1.6730 0.0000 C 0 0 0 0 0 0 0 0 0 0 0 0 3.0000 -0.6730 0.0000 C 0 0 3 0 0 0 0 0 0 0 0 0 2.0000 -1.6730 0.0000 C 0 0 0 0 0 0 0 0 0 0 0 0 2.0000 -0.6730 0.0000 C 0 0 0 0 0 0 0 0 0 0 0 0 4.0000 -1.6730 0.0000 C 0 0 0 0 0 0 0 0 0 0 0 0 3.0000 -2.6730 0.0000 C 0 0 0 0 0 0 0 0 0 0 0 0 3.70…	(3E)-4-(2,2-Dimethylcyclobutyl)-3-buten-2-one	C10 H16 O	152.12	9227021	8
	FALSE	# ACD/Labs08121512342D 11 10 0 0 0 0 0 0 0 0 1 V2000 5.7764 -1.9695 0.0000 C 0 0 0 0 0 0 0 0 0 0 0 0 4.5933 -1.3153 0.0000 C 0 0 0 0 0 0 0 0 0 0 0 0 3.4171 -1.8373 0.0000 C 0 0 0 0 0 0 0 0 0 0 0 0 6.9595 -3.8069 0.0000 C 0 0 0 0 0 0 0 0 0 0 0 0 5.7764 -3.2849 0.0000 C 0 0 0 0 0 0 0 0 0 0 0 0 4.5933 -3.9391 0.0000 C 0 0 0 0 0 0 0 0 0 0 0 0 2.8882 0.0000 0.0000 C 0 0 0 0 0 0 0 0 0 0 0 0 2.3662 -1.1…	(5Z)-3,7-Dimethyl-1,5,7-octatrien-3-ol	C10 H16 O	152.12	35013848	7
	FALSE	#5319360 -OEChem-02070710142D 27 27 0 1 0 0 0 0 0999 V2000 2.6200 1.5000 0.0000 O 0 0 0 0 0 0 0 0 0 0 0 0 3.1200 0.6340 0.0000 C 0 0 3 0 0 0 0 0 0 0 0 0 3.6200 1.5000 0.0000 C 0 0 0 0 0 0 0 0 0 0 0 0 3.9860 0.1340 0.0000 C 0 0 0 0 0 0 0 0 0 0 0 0 3.9860 -0.8660 0.0000 C 0 0 0 0 0 0 0 0 0 0 0 0 2.2540 0.1340 0.0000 C 0 0 0 0 0 0 0 0 0 0 0 0 4.6200 1.5000 0.0000 C 0 0 0 0 0 0 0 0 0 0 0 0 3.1200 2.3…	1-Isopropyl-4-methylene-2-cyclohexen-1-ol	C10 H16 O	152.12	4477669	7
	FALSE	#561870 -OEChem-02070708272D 27 28 0 1 0 0 0 0 0999 V2000 2.5664 -1.5168 0.0000 O 0 0 0 0 0 0 0 0 0 0 0 0 4.3265 0.3800 0.0000 C 0 0 3 0 0 0 0 0 0 0 0 0 4.3265 -0.6200 0.0000 C 0 0 3 0 0 0 0 0 0 0 0 0 5.1930 -0.1200 0.0000 C 0 0 0 0 0 0 0 0 0 0 0 0 3.3754 -0.9290 0.0000 C 0 0 3 0 0 0 0 0 0 0 0 0 4.3265 1.3800 0.0000 C 0 0 0 0 0 0 0 0 0 0 0 0 3.3754 0.6891 0.0000 C 0 0 0 0 0 0 0 0 0 0 0 0 2.7876 -…	5-Isopropyl-2-methylbicyclo[3.1.0]hex-3-en-2-ol	C10 H16 O	152.12	488436	7
	FALSE	# ACD/Labs08121513332D 11 11 0 0 0 0 0 0 0 0 1 V2000 1.7655 0.0000 0.0000 C 0 0 0 0 0 0 0 0 0 0 0 0 1.3118 -1.2526 0.0000 C 0 0 0 0 0 0 0 0 0 0 0 0 0.0000 -1.4795 0.0000 C 0 0 0 0 0 0 0 0 0 0 0 0 2.1650 -2.2685 0.0000 C 0 0 0 0 0 0 0 0 0 0 0 0 3.3190 -2.9343 0.0000 C 0 0 0 0 0 0 0 0 0 0 0 0 3.3190 -4.2658 0.0000 C 0 0 0 0 0 0 0 0 0 0 0 0 2.1650 -4.9316 0.0000 C 0 0 0 0 0 0 0 0 0 0 0 0 1.0159 -4.2…	1-Isopropyl-3-cyclohexene-1-carbaldehyde	C10 H16 O	152.12	35031654	6
	FALSE	# ACD/Labs08121512272D 11 11 0 0 0 0 0 0 0 0 1 V2000 1.1482 -7.3135 0.0000 C 0 0 0 0 0 0 0 0 0 0 0 0 0.0000 -1.3311 0.0000 C 0 0 0 0 0 0 0 0 0 0 0 0 2.3038 -5.3169 0.0000 C 0 0 0 0 0 0 0 0 0 0 0 0 0.0000 -5.3169 0.0000 C 0 0 0 0 0 0 0 0 0 0 0 0 2.3038 -3.9859 0.0000 C 0 0 0 0 0 0 0 0 0 0 0 0 0.0000 -3.9859 0.0000 C 0 0 0 0 0 0 0 0 0 0 0 0 2.3038 -1.3311 0.0000 C 0 0 0 0 0 0 0 0 0 0 0 0 1.1482 -5.…	2-(4-Methyl-1-cyclohexen-1-yl)propanal	C10 H16 O	152.12	35013279	6
	FALSE	# ACD/Labs08121512272D 11 10 0 0 0 0 0 0 0 0 1 V2000 0.0000 -1.9933 0.0000 C 0 0 0 0 0 0 0 0 0 0 0 0 8.0702 -1.3316 0.0000 C 0 0 0 0 0 0 0 0 0 0 0 0 6.9162 -3.3249 0.0000 C 0 0 0 0 0 0 0 0 0 0 0 0 2.3081 -3.3249 0.0000 C 0 0 0 0 0 0 0 0 0 0 0 0 1.1540 -1.3316 0.0000 C 0 0 0 0 0 0 0 0 0 0 0 0 3.4621 -1.3316 0.0000 C 0 0 0 0 0 0 0 0 0 0 0 0 4.6081 -1.9933 0.0000 C 0 0 0 0 0 0 0 0 0 0 0 0 6.9162 -1.…	2,6-Dimethyl-1,7-octadien-3-one	C10 H16 O	152.12	35013450	5
	FALSE	# ACD/Labs08121512322D 11 11 0 0 0 0 0 0 0 0 1 V2000 0.0000 -5.6734 0.0000 C 0 0 0 0 0 0 0 0 0 0 0 0 2.3034 -5.6734 0.0000 C 0 0 0 0 0 0 0 0 0 0 0 0 0.2950 0.0000 0.0000 C 0 0 0 0 0 0 0 0 0 0 0 0 2.3034 -3.0126 0.0000 C 0 0 0 0 0 0 0 0 0 0 0 0 0.0000 -3.0126 0.0000 C 0 0 0 0 0 0 0 0 0 0 0 0 2.3034 -1.6850 0.0000 C 0 0 0 0 0 0 0 0 0 0 0 0 0.0000 -1.6850 0.0000 C 0 0 0 0 0 0 0 0 0 0 0 0 1.1517 -5.0…	4-Isopropenyl-1-methyl-3-cyclohexen-1-ol	C10 H16 O	152.12	35014398	5
	FALSE	# ACD/Labs08121512322D 11 11 0 0 0 0 0 0 0 0 1 V2000 0.2387 -7.0192 0.0000 C 0 0 0 0 0 0 0 0 0 0 0 0 0.0000 -4.7309 0.0000 C 0 0 0 0 0 0 0 0 0 0 0 0 1.2003 0.0000 0.0000 C 0 0 0 0 0 0 0 0 0 0 0 0 2.1057 -5.6645 0.0000 C 0 0 0 0 0 0 0 0 0 0 0 0 2.6462 -4.4501 0.0000 C 0 0 0 0 0 0 0 0 0 0 0 0 2.2742 -2.1128 0.0000 C 0 0 0 0 0 0 0 0 0 0 0 0 0.1193 -2.1128 0.0000 C 0 0 0 0 0 0 0 0 0 0 0 0 0.7791 -5.8…	4-Methyl-2-[(1Z)-3-methyl-1,3-butadien-1-yl]tetrahydrofuran	C10 H16 O	152.12	35014078	5
	FALSE	# ACD/Labs08121512342D 11 12 0 0 0 0 0 0 0 0 1 V2000 0.0780 0.0000 0.0000 C 0 0 0 0 0 0 0 0 0 0 0 0 1.2908 -6.0036 0.0000 C 0 0 0 0 0 0 0 0 0 0 0 0 2.6176 -6.0036 0.0000 C 0 0 0 0 0 0 0 0 0 0 0 0 0.0000 -2.2994 0.0000 C 0 0 0 0 0 0 0 0 0 0 0 0 2.0352 -1.2187 0.0000 C 0 0 0 0 0 0 0 0 0 0 0 0 0.6244 -3.4761 0.0000 C 0 0 0 0 0 0 0 0 0 0 0 0 2.6596 -2.3954 0.0000 C 0 0 0 0 0 0 0 0 0 0 0 0 0.7024 -1.1…	1-Cyclopropyl-4-methyl-3-cyclohexen-1-ol	C10 H16 O	152.12	35013874	4
	FALSE	# ACD/Labs08121512362D 11 12 0 0 0 0 0 0 0 0 1 V2000 1.9949 0.0000 0.0000 C 0 0 0 0 0 0 0 0 0 0 0 0 0.0000 -1.1555 0.0000 C 0 0 0 0 0 0 0 0 0 0 0 0 5.4505 -4.3004 0.0000 C 0 0 0 0 0 0 0 0 0 0 0 0 4.3004 -2.3056 0.0000 C 0 0 0 0 0 0 0 0 0 0 0 0 3.1449 -1.6406 0.0000 C 0 0 0 0 0 0 0 0 0 0 0 0 3.1449 -4.3004 0.0000 C 0 0 0 0 0 0 0 0 0 0 0 0 1.3299 -1.1555 0.0000 C 0 0 0 0 0 0 0 0 0 0 0 0 4.3004 -3.6…	1-Isopropyl-4-methylene-7-oxabicyclo[4.1.0]heptane	C10 H16 O	152.12	35014712	4
	FALSE	# ACD/Labs08121512372D 11 12 0 0 0 0 0 0 0 0 1 V2000 2.3058 0.0000 0.0000 C 0 0 0 0 0 0 0 0 0 0 0 0 1.1501 -0.6659 0.0000 C 0 0 0 0 0 0 0 0 0 0 0 0 1.1501 -1.9921 0.0000 C 0 0 0 0 0 0 0 0 0 0 0 0 2.3058 -2.6579 0.0000 C 0 0 0 0 0 0 0 0 0 0 0 0 4.7216 -0.2531 0.0000 C 0 0 0 0 0 0 0 0 0 0 0 0 3.4559 -0.6659 0.0000 C 0 0 0 0 0 0 0 0 0 0 0 0 3.4559 -1.9921 0.0000 C 0 0 0 0 0 0 0 0 0 0 0 0 4.7216 -2.4…	3,6-Dimethyl-1,3,3a,4,5,7a-hexahydro-2-benzofuran	C10 H16 O	152.12	35015019	1
	FALSE	# ACD/Labs08121512322D 11 12 0 0 0 0 0 0 0 0 1 V2000 0.0000 -5.2456 0.0000 C 0 0 0 0 0 0 0 0 0 0 0 0 0.9180 -4.3276 0.0000 C 0 0 0 0 0 0 0 0 0 0 0 0 2.2294 -4.5899 0.0000 C 0 0 0 0 0 0 0 0 0 0 0 0 3.2785 -3.6719 0.0000 C 0 0 0 0 0 0 0 0 0 0 0 0 2.7539 -2.3605 0.0000 C 0 0 0 0 0 0 0 0 0 0 0 0 1.8360 -3.1473 0.0000 C 0 0 0 0 0 0 0 0 0 0 0 0 0.6557 -3.0162 0.0000 C 0 0 0 0 0 0 0 0 0 0 0 0 0.6557 -1.…	4,7,7-Trimethyl-6-oxabicyclo[3.2.1]oct-2-ene	C10 H16 O	152.12	35014346	1
FALSE	Pregabalin	C8 H17 N O2	Full match	Full match		159.126	8.339	7.5515e+08	2	No MS2	496730	13073.7	15853.8	1.06884e+08	1.14011e+08	3.94251e+07	1.28432e+07	2.658e+07	1.48888e+07	1.93454e+07	1.96768e+08	2.02348e+07	2.72779e+07	4.369e+08	110029	8.81617e+07	7.90696e+07	2.74614e+07	1.16339e+08	3.13424e+07	3.01655e+07	7.5515e+08	2.22663e+07	2.48118e+07	132435	1.16044e+08	1.05199e+08	3.14158e+07	1.64494e+08	1.97854e+07	1.79657e+07	1.82135e+07	2.42826e+07	2.88324e+07	2.02372e+07	113751	9.90489e+07	9.75391e+07	6.65863e+08
	Checked	Structure	Name	Formula	Molecular Weight	CSID	# References
	FALSE	# ACD/Labs04281710492D 11 10 0 0 1 0 0 0 0 0 1 V2000 0.0000 -2.0279 0.0000 O 0 0 0 0 0 0 0 0 0 0 0 0 1.1098 0.0000 0.0000 O 0 0 0 0 0 0 0 0 0 0 0 0 0.0581 -3.3236 0.0000 N 0 0 0 0 0 0 0 0 0 0 0 0 2.3358 -3.2539 0.0000 C 0 0 0 0 0 0 0 0 0 0 0 0 2.3416 -1.9233 0.0000 C 0 0 0 0 0 0 0 0 0 0 0 0 1.1040 -1.3132 0.0000 C 0 0 0 0 0 0 0 0 0 0 0 0 3.5154 -3.8756 0.0000 C 0 0 0 0 0 0 0 0 0 0 0 0 1.2202 -3.9…	Pregabalin	C8 H17 N O2	159.126	4589156	1783
	FALSE	# ACD/Labs04111411492D 11 10 0 0 0 0 0 0 0 0 1 V2000 8.0510 -1.3188 0.0000 C 0 0 0 0 0 0 0 0 0 0 0 0 8.0510 0.0000 0.0000 O 0 0 0 0 0 0 0 0 0 0 0 0 9.2222 -2.0012 0.0000 O 0 0 0 0 0 0 0 0 0 0 0 0 6.9443 -2.0012 0.0000 C 0 0 0 0 0 0 0 0 0 0 0 0 5.7823 -1.3188 0.0000 C 0 0 0 0 0 0 0 0 0 0 0 0 1.1712 -1.3188 0.0000 C 0 0 0 0 0 0 0 0 0 0 0 0 2.3056 -1.9643 0.0000 C 0 0 0 0 0 0 0 0 0 0 0 0 4.6388 -2.0…	RH0365500	C8 H17 N O2	159.126	62727	167
FALSE	1-(4-Amino-4-carboxybutanoyl)-2-piperidinecarboxylic acid	C11 H18 N2 O5	Full match	Full match		258.121	1.784	7.51648e+08	2	No MS2	78278.1	74822	444671	7.51648e+08	7.20602e+08	4.0357e+08	3.10589e+08	3.89243e+08	4.51136e+08	4.23369e+08	5.95332e+08	3.70249e+08	5.3359e+08	4.70967e+08	622039	6.1047e+08	3.79539e+08	3.44711e+08	4.79657e+08	3.29577e+08	5.12313e+08	5.32113e+08	4.86849e+08	6.72704e+08	703123	7.13201e+08	5.53456e+08	6.40792e+08	4.89196e+08	6.25638e+06	4.15941e+08	3.45678e+08	3.47751e+08	6.32354e+08	5.80918e+08	681307	6.72527e+08	3.63185e+08	5.6308e+08
	Checked	Structure	Name	Formula	Molecular Weight	CSID	# References
	FALSE	# ACD/Labs08121512342D 18 18 0 0 0 0 0 0 0 0 1 V2000 6.2147 -2.0679 0.0000 C 0 0 0 0 0 0 0 0 0 0 0 0 5.0670 -2.7284 0.0000 C 0 0 0 0 0 0 0 0 0 0 0 0 7.3732 -2.7284 0.0000 C 0 0 0 0 0 0 0 0 0 0 0 0 0.6496 -3.1831 0.0000 C 0 0 0 0 0 0 0 0 0 0 0 0 1.3209 -4.3308 0.0000 C 0 0 0 0 0 0 0 0 0 0 0 0 3.9085 -2.0679 0.0000 C 0 0 0 0 0 0 0 0 0 0 0 0 8.5208 -2.0679 0.0000 C 0 0 0 0 0 0 0 0 0 0 0 0 1.5374 -2.…	1-(5-Amino-5-carboxypentyl)-5-oxoproline	C11 H18 N2 O5	258.122	35014632	4
	FALSE	# ACD/Labs08121512342D 18 18 0 0 0 0 0 0 0 0 1 V2000 0.0000 -1.9896 0.0000 C 0 0 0 0 0 0 0 0 0 0 0 0 0.0000 -3.3160 0.0000 C 0 0 0 0 0 0 0 0 0 0 0 0 1.1514 -1.3264 0.0000 C 0 0 0 0 0 0 0 0 0 0 0 0 5.7569 -3.9884 0.0000 C 0 0 0 0 0 0 0 0 0 0 0 0 4.6055 -3.3160 0.0000 C 0 0 0 0 0 0 0 0 0 0 0 0 1.1514 -3.9884 0.0000 C 0 0 0 0 0 0 0 0 0 0 0 0 6.9083 -3.3160 0.0000 C 0 0 0 0 0 0 0 0 0 0 0 0 2.3028 -1.…	1-(4-Amino-4-carboxybutanoyl)-2-piperidinecarboxylic acid	C11 H18 N2 O5	258.122	35014615	4
FALSE			No results	No results		134.056	1.751	7.48883e+08	0	No MS2	38053.3	34175.7	336225	3.26184e+08	3.13218e+08	9.13097e+07	879793	4.42975e+07	1.08027e+08	2.61318e+06	2.31075e+08	1.29722e+08	3.6696e+07	1.60861e+08	355757	2.53248e+08	2.43347e+08	4.0589e+06	1.85955e+08	1.1281e+08	2.31677e+08	1.96719e+08	5.65238e+08	2.14058e+08	389793	2.99553e+08	3.06432e+08	2.51682e+07	2.27443e+08	4.87337e+06	2.87701e+07	3.4047e+07	7.21432e+06	4.56098e+07	3.19498e+08	392238	3.03767e+08	2.90073e+08	1.92183e+08
	Checked	Structure	Name	Formula	Molecular Weight	CSID	# References
FALSE	(-)-pinellic acid	C18 H34 O5	Full match	Full match		330.24	13.217	7.46385e+08	6	No MS2	144780	12520.6	133270	1.61947e+08	1.70936e+08	281231	222907	202511	148331	277117	7.46385e+08	167101	262378	4.80449e+08	172092	8.13399e+07	7.16641e+07	245487	1.22861e+08	6.89987e+07	309839	6.5713e+08	206048	235387	189674	1.51216e+08	1.2943e+08	241470	6.92752e+08	238831	214028	175326	245496	333850	218280	167499	1.28085e+08	1.23215e+08	6.07746e+08
	Checked	Structure	Name	Formula	Molecular Weight	CSID	# References
	FALSE	# ACD/Labs04221415492D 23 22 0 0 1 0 0 0 0 0 1 V2000 13.2587 -2.2572 0.0000 O 0 0 0 0 0 0 0 0 0 0 0 0 15.1702 -2.2572 0.0000 O 0 0 0 0 0 0 0 0 0 0 0 0 9.5373 -2.3182 0.0000 O 0 0 0 0 0 0 0 0 0 0 0 0 1.1388 -2.1149 0.0000 O 0 0 0 0 0 0 0 0 0 0 0 0 0.0000 -0.0610 0.0000 O 0 0 0 0 0 0 0 0 0 0 0 0 13.5231 -0.6507 0.0000 C 0 0 0 0 0 0 0 0 0 0 0 0 14.8449 -0.6507 0.0000 C 0 0 0 0 0 0 0 0 0 0 0 0 12.302…	(-)-pinellic acid	C18 H34 O5	330.241	8034429	22
	FALSE	#5282966 -OEChem-02070710102D 57 56 0 1 0 0 0 0 0999 V2000 6.3301 1.2500 0.0000 O 0 0 0 0 0 0 0 0 0 0 0 0 7.1962 -1.2500 0.0000 O 0 0 0 0 0 0 0 0 0 0 0 0 9.7942 1.2500 0.0000 O 0 0 0 0 0 0 0 0 0 0 0 0 17.5885 -0.2500 0.0000 O 0 0 0 0 0 0 0 0 0 0 0 0 16.7224 1.2500 0.0000 O 0 0 0 0 0 0 0 0 0 0 0 0 11.5263 0.2500 0.0000 C 0 0 0 0 0 0 0 0 0 0 0 0 12.3923 -0.2500 0.0000 C 0 0 0 0 0 0 0 0 0 0 0 0 6.33…	(10E)-9,12,13-Trihydroxy-10-octadecenoic acid	C18 H34 O5	330.241	4446093	15
	FALSE	# ACD/Labs04221415492D 23 22 0 0 0 0 0 0 0 0 1 V2000 11.7795 -2.1760 0.0000 O 0 0 0 0 0 0 0 0 0 0 0 0 9.8127 -2.1760 0.0000 O 0 0 0 0 0 0 0 0 0 0 0 0 15.6083 -1.9877 0.0000 O 0 0 0 0 0 0 0 0 0 0 0 0 1.1717 -2.1760 0.0000 O 0 0 0 0 0 0 0 0 0 0 0 0 0.0000 -0.0837 0.0000 O 0 0 0 0 0 0 0 0 0 0 0 0 11.4866 -0.7323 0.0000 C 0 0 0 0 0 0 0 0 0 0 0 0 10.1684 -0.7323 0.0000 C 0 0 0 0 0 0 0 0 0 0 0 0 12.658…	9,10,13-Trihydroxy-11-octadecenoic acid	C18 H34 O5	330.241	4446092	11
	FALSE	# SciTegic04031415222D 23 22 0 0 0 0 0 0 0 0999 V2000 0.0000 -1.9921 0.0000 C 0 0 0 0 0 0 0 0 0 0 0 0 1.1621 -1.3281 0.0000 C 0 0 0 0 0 0 0 0 0 0 0 0 2.3034 -1.9921 0.0000 C 0 0 0 0 0 0 0 0 0 0 0 0 3.4655 -1.3281 0.0000 C 0 0 0 0 0 0 0 0 0 0 0 0 4.6068 -1.9921 0.0000 C 0 0 0 0 0 0 0 0 0 0 0 0 5.7689 -1.3281 0.0000 C 0 0 1 0 0 0 0 0 0 0 0 0 6.9102 -1.9921 0.0000 C 0 0 0 0 0 0 0 0 0 0 0 0 8.0722 -1…	(9S,10R,11E,13S)-9,10,13-Trihydroxy-11-octadecenoic acid	C18 H34 O5	330.241	30776564	6
	FALSE	#5312877 -OEChem-02070710132D 57 56 0 1 0 0 0 0 0999 V2000 13.2583 -1.2500 0.0000 O 0 0 0 0 0 0 0 0 0 0 0 0 7.1962 1.2500 0.0000 O 0 0 0 0 0 0 0 0 0 0 0 0 10.6603 1.2500 0.0000 O 0 0 0 0 0 0 0 0 0 0 0 0 17.5885 0.2500 0.0000 O 0 0 0 0 0 0 0 0 0 0 0 0 16.7224 -1.2500 0.0000 O 0 0 0 0 0 0 0 0 0 0 0 0 13.2583 -0.2500 0.0000 C 0 0 3 0 0 0 0 0 0 0 0 0 12.3923 0.2500 0.0000 C 0 0 0 0 0 0 0 0 0 0 0 0 6.…	(9E)-5,8,12-Trihydroxy-9-octadecenoic acid	C18 H34 O5	330.241	4472302	4
	FALSE	# ACD/Labs04221415492D 23 23 0 0 0 0 0 0 0 0 1 V2000 13.9352 -2.1950 0.0000 O 0 0 0 0 0 0 0 0 0 0 0 0 11.4582 -2.2151 0.0000 O 0 0 0 0 0 0 0 0 0 0 0 0 9.5452 -2.2151 0.0000 O 0 0 0 0 0 0 0 0 0 0 0 0 1.0673 -1.8929 0.0000 O 0 0 0 0 0 0 0 0 0 0 0 0 0.0000 0.0000 0.0000 O 0 0 0 0 0 0 0 0 0 0 0 0 13.3713 -0.7048 0.0000 C 0 0 0 0 0 0 0 0 0 0 0 0 14.6198 -0.7048 0.0000 C 0 0 0 0 0 0 0 0 0 0 0 0 12.2839…	9,10-Dihydroxy-11-(3-pentyl-2-oxiranyl)undecanoic acid	C18 H34 O5	330.241	10128358	3
FALSE	MFCD00674434	C20 H37 N O2	Full match	Full match		323.282	14.419	7.457e+08	1	No MS2	239679	22906.8	182251	2.21958e+07	2.51336e+07	1.2138e+06	6.15413e+06	278435	751400	7.27097e+06	1.47112e+07	520704	838203	8.84377e+06	352340	1.54852e+07	1.53036e+07	878828	2.72675e+06	691885	1.82253e+06	1.03701e+07	797118	424738	368974	2.57953e+07	2.01127e+07	1.01468e+06	9.81231e+06	1.45913e+06	361845	1.04929e+06	7.49766e+06	470067	630050	316680	2.27433e+07	2.06152e+07	8.68722e+06
	Checked	Structure	Name	Formula	Molecular Weight	CSID	# References
	FALSE	# ACD/Labs04281711442D 23 22 0 0 0 0 0 0 0 0 1 V2000 1.1478 -4.6602 0.0000 C 0 0 0 0 0 0 0 0 0 0 0 0 0.0000 -3.9964 0.0000 C 0 0 0 0 0 0 0 0 0 0 0 0 0.0000 -2.6689 0.0000 C 0 0 0 0 0 0 0 0 0 0 0 0 1.1478 -2.0051 0.0000 C 0 0 0 0 0 0 0 0 0 0 0 0 1.1478 -0.6638 0.0000 C 0 0 0 0 0 0 0 0 0 0 0 0 2.3094 0.0000 0.0000 C 0 0 0 0 0 0 0 0 0 0 0 0 3.4571 -0.6638 0.0000 C 0 0 0 0 0 0 0 0 0 0 0 0 4.6049 0.00…	MFCD00674434	C20 H37 N O2	323.282	4446566	60
FALSE	Indoleacrylic acid	C11 H9 N O2	Full match	Full match		187.063	7.234	7.35896e+08	1	No MS2	549704	13052	13418.3	2.42921e+08	2.69566e+08	7.55424e+07	3.67882e+07	9.82773e+07	7.02606e+07	7.25179e+07	1.48182e+08	4.63075e+07	4.66615e+07	5.20206e+08	77493	2.23072e+08	2.197e+08	3.82261e+07	3.58069e+07	5.37571e+07	1.24853e+08	1.82962e+08	6.02108e+08	1.08842e+08	87824	2.48952e+08	2.33388e+08	7.0559e+07	7.2424e+07	9.70851e+07	4.88551e+07	4.2755e+07	4.89658e+07	7.86316e+07	2.18334e+07	83685.6	2.01273e+08	2.04785e+08	5.05545e+07
	Checked	Structure	Name	Formula	Molecular Weight	CSID	# References
	FALSE	# ACD/Labs04190703572D 14 15 0 0 0 0 0 0 0 0 1 V2000 0.0000 -1.6422 0.0000 C 0 0 0 0 0 0 0 0 0 0 0 0 0.0000 -2.9676 0.0000 C 0 0 0 0 0 0 0 0 0 0 0 0 1.1504 -3.6345 0.0000 C 0 0 0 0 0 0 0 0 0 0 0 0 2.3007 -2.9676 0.0000 C 0 0 0 0 0 0 0 0 0 0 0 0 2.3007 -1.6422 0.0000 C 0 0 0 0 0 0 0 0 0 0 0 0 1.1504 -0.9753 0.0000 C 0 0 0 0 0 0 0 0 0 0 0 0 3.5678 -1.2337 0.0000 C 0 0 0 0 0 0 0 0 0 0 0 0 4.3513 -2.…	Indoleacrylic acid	C11 H9 N O2	187.063	10607876	44
FALSE			No results	No results		88.1005	0.893	7.30265e+08	0	No MS2	42903.9	45830.3	49498.6	7.1955e+08	5.71665e+08	5.20476e+08	3.38292e+08	3.31811e+08	2.81142e+08	3.03092e+08	4.87918e+08	3.29586e+08	5.13808e+08	2.72947e+08	304139	3.42531e+08	3.11349e+08	3.08143e+08	4.78615e+08	2.9772e+08	4.95015e+08	4.12857e+08	6.33605e+08	3.33806e+08	625571	6.52119e+08	5.28715e+08	6.00216e+08	4.01793e+08	3.58325e+06	4.31985e+08	2.45493e+08	3.1388e+08	4.53078e+08	5.05992e+08	444676	4.54349e+08	5.57719e+08	5.38954e+08
	Checked	Structure	Name	Formula	Molecular Weight	CSID	# References
FALSE	Leu-Val	C11 H22 N2 O3	Full match	Full match		230.163	7.694	7.21505e+08	4	No MS2	777967	30266.9	176899	7.44945e+07	8.43869e+07	6.38136e+08	1.92688e+08	2.20283e+08	2.35429e+08	3.93157e+08	4.79773e+08	1.30601e+08	4.80538e+08	2.45471e+08	309044	8.06597e+07	7.56995e+07	4.5225e+08	5.86397e+08	4.81988e+08	5.39653e+08	4.14708e+08	1.82785e+06	3.36549e+08	317401	1.2076e+08	1.31621e+08	4.29077e+08	4.81037e+08	9.00315e+06	3.02638e+08	4.00209e+08	2.60997e+08	2.37629e+08	5.17293e+07	311868	1.51479e+08	1.3456e+08	7.21505e+08
	Checked	Structure	Name	Formula	Molecular Weight	CSID	# References
	FALSE	#352038 -OEChem-02070708242D 38 37 0 1 0 0 0 0 0999 V2000 6.0010 -1.7500 0.0000 O 0 0 0 0 0 0 0 0 0 0 0 0 2.5369 -0.7500 0.0000 O 0 0 0 0 0 0 0 0 0 0 0 0 3.4030 0.7500 0.0000 O 0 0 0 0 0 0 0 0 0 0 0 0 5.1350 -0.2500 0.0000 N 0 0 0 0 0 0 0 0 0 0 0 0 7.7331 -0.7500 0.0000 N 0 0 0 0 0 0 0 0 0 0 0 0 6.8671 0.7500 0.0000 C 0 0 0 0 0 0 0 0 0 0 0 0 6.8671 -0.2500 0.0000 C 0 0 3 0 0 0 0 0 0 0 0 0 7.7331 …	Leu-Val	C11 H22 N2 O3	230.163	312585	53
	FALSE	#352039 -OEChem-02070708242D 38 37 0 1 0 0 0 0 0999 V2000 6.0010 -0.7500 0.0000 O 0 0 0 0 0 0 0 0 0 0 0 0 2.5369 0.2500 0.0000 O 0 0 0 0 0 0 0 0 0 0 0 0 3.4030 1.7500 0.0000 O 0 0 0 0 0 0 0 0 0 0 0 0 5.1350 0.7500 0.0000 N 0 0 0 0 0 0 0 0 0 0 0 0 7.7331 0.2500 0.0000 N 0 0 0 0 0 0 0 0 0 0 0 0 4.2690 -0.7500 0.0000 C 0 0 0 0 0 0 0 0 0 0 0 0 4.2690 0.2500 0.0000 C 0 0 3 0 0 0 0 0 0 0 0 0 3.4030 -1.…	Val-Leu	C11 H22 N2 O3	230.163	312586	27
	FALSE	#435949 -OEChem-02070708252D 38 37 0 1 0 0 0 0 0999 V2000 6.0010 -1.1550 0.0000 O 0 0 0 0 0 0 0 0 0 0 0 0 2.5369 -0.1550 0.0000 O 0 0 0 0 0 0 0 0 0 0 0 0 3.4030 1.3450 0.0000 O 0 0 0 0 0 0 0 0 0 0 0 0 5.1350 0.3450 0.0000 N 0 0 0 0 0 0 0 0 0 0 0 0 6.8671 1.3450 0.0000 N 0 0 0 0 0 0 0 0 0 0 0 0 7.7331 -0.1550 0.0000 C 0 0 3 0 0 0 0 0 0 0 0 0 6.8671 0.3450 0.0000 C 0 0 3 0 0 0 0 0 0 0 0 0 4.2690 -0…	Ile-val	C11 H22 N2 O3	230.163	385545	13
	FALSE	#5246012 -OEChem-02070710102D 38 37 0 1 0 0 0 0 0999 V2000 4.2690 1.2500 0.0000 O 0 0 0 0 0 0 0 0 0 0 0 0 6.8671 1.7500 0.0000 O 0 5 0 0 0 0 0 0 0 0 0 0 5.1350 1.7500 0.0000 O 0 0 0 0 0 0 0 0 0 0 0 0 5.1350 -0.2500 0.0000 N 0 0 0 0 0 0 0 0 0 0 0 0 2.5369 0.2500 0.0000 N 0 3 0 0 0 0 0 0 0 0 0 0 6.8671 -0.2500 0.0000 C 0 0 3 0 0 0 0 0 0 0 0 0 3.4030 -0.2500 0.0000 C 0 0 3 0 0 0 0 0 0 0 0 0 6.0010 0…	val-ile	C11 H22 N2 O3	230.163	4414314	6
FALSE		C48 H80 O8	Full match	No results		784.584	13.064	7.1107e+08	0	No MS2	220986	27591.9	214249	3.72474e+08	3.56001e+08	4.4093e+08	2.96563e+08	3.706e+08	1.61389e+08	4.04635e+08	4.23623e+08	2.30242e+08	5.55122e+08	3.36078e+08	370976	2.40546e+08	1.83382e+08	2.83286e+08	2.06016e+08	1.43505e+08	2.92786e+08	4.43484e+08	428308	2.11866e+08	437850	3.02279e+08	2.81491e+08	3.59971e+08	4.5546e+08	1.51466e+08	2.56052e+08	3.25913e+08	3.5333e+08	6.16595e+08	421364	384530	2.89937e+08	2.6384e+08	3.64323e+08
	Checked	Structure	Name	Formula	Molecular Weight	CSID	# References
FALSE	DL-Citrulline	C6 H13 N3 O3	Full match	Full match		175.095	1.021	7.07283e+08	3	No MS2	72689.8	67708.8	286985	1.68666e+08	1.73281e+08	1.44619e+08	1.7425e+08	1.29054e+08	1.66618e+08	2.52152e+08	4.70269e+08	1.34697e+08	1.25121e+08	7.07283e+08	543199	1.56539e+08	1.46604e+08	2.1429e+08	3.69355e+07	2.14197e+08	2.24104e+08	1.89065e+08	4.4987e+07	1.77077e+08	578619	1.6055e+08	1.59818e+08	1.70661e+08	6.62796e+08	1.39213e+08	1.18141e+08	1.71837e+08	1.58817e+08	8.06478e+07	5.01775e+07	608628	1.6091e+08	1.5628e+08	4.66102e+07
	Checked	Structure	Name	Formula	Molecular Weight	CSID	# References
	FALSE	# ACD/Labs06251410112D 12 11 0 0 0 0 0 0 0 0 1 V2000 0.0000 -6.9128 0.0000 N 0 0 0 0 0 0 0 0 0 0 0 0 1.3309 -6.9128 0.0000 C 0 0 0 0 0 0 0 0 0 0 0 0 1.9924 -8.0663 0.0000 O 0 0 0 0 0 0 0 0 0 0 0 0 1.9924 -5.7594 0.0000 N 0 0 0 0 0 0 0 0 0 0 0 0 1.3309 -4.6059 0.0000 C 0 0 0 0 0 0 0 0 0 0 0 0 1.9924 -3.4605 0.0000 C 0 0 0 0 0 0 0 0 0 0 0 0 1.3309 -2.3070 0.0000 C 0 0 0 0 0 0 0 0 0 0 0 0 1.9924 -1.…	DL-Citrulline	C6 H13 N3 O3	175.096	810	2405
	FALSE	# ACD/Labs04281710562D 13 12 0 0 1 0 0 0 0 0 1 V2000 0.0000 -3.4518 0.0000 N 0 0 0 0 0 0 0 0 0 0 0 0 1.3310 -3.4518 0.0000 C 0 0 0 0 0 0 0 0 0 0 0 0 1.3310 -4.7827 0.0000 H 0 0 0 0 0 0 0 0 0 0 0 0 2.6620 -3.4518 0.0000 C 0 0 0 0 0 0 0 0 0 0 0 0 3.3274 -2.3036 0.0000 C 0 0 0 0 0 0 0 0 0 0 0 0 4.6511 -2.3036 0.0000 C 0 0 0 0 0 0 0 0 0 0 0 0 5.3166 -1.1482 0.0000 N 0 0 0 0 0 0 0 0 0 0 0 0 6.6476 -1.…	L-Citrulline	C6 H13 N3 O3	175.096	9367	425
	FALSE	# ACD/Labs04281712172D 13 12 0 0 1 0 0 0 0 0 1 V2000 0.0000 -8.0611 0.0000 N 0 0 0 0 0 0 0 0 0 0 0 0 1.3266 -8.0611 0.0000 C 0 0 0 0 0 0 0 0 0 0 0 0 1.9899 -9.2126 0.0000 N 0 0 0 0 0 0 0 0 0 0 0 0 1.9899 -6.9095 0.0000 N 0 0 0 0 0 0 0 0 0 0 0 0 1.3266 -5.7579 0.0000 C 0 0 0 0 0 0 0 0 0 0 0 0 1.9899 -4.6063 0.0000 C 0 0 0 0 0 0 0 0 0 0 0 0 1.3266 -3.4547 0.0000 C 0 0 0 0 0 0 0 0 0 0 0 0 1.9899 -2.…	Arginic acid	C6 H13 N3 O3	175.096	140984	60
FALSE	Ethyl docosahexaenoate	C24 H36 O2	Full match	Full match		356.271	12.916	6.98974e+08	4	No MS2	137136	12306.2	149073	2.08546e+08	2.31449e+08	1.94427e+08	2.88278e+06	8.85444e+07	3.72891e+06	5.31263e+06	6.98974e+08	8.87882e+07	6.30314e+07	4.49116e+08	167337	1.74153e+08	1.015e+08	3.47801e+06	3.55016e+08	1.96735e+08	2.90197e+08	4.68466e+08	261590	1.91346e+08	208521	1.7408e+08	1.69011e+08	2.64471e+08	5.79956e+08	3.26768e+06	1.08579e+08	2.99565e+06	3.88584e+06	2.45733e+08	172738	157486	1.55026e+08	1.36801e+08	6.3763e+08
	Checked	Structure	Name	Formula	Molecular Weight	CSID	# References
	FALSE	# ACD/Labs04281710402D 26 25 0 0 0 0 0 0 0 0 1 V2000 26.4343 -1.9847 0.0000 O 0 0 0 0 0 0 0 0 0 0 0 0 25.3125 0.0000 0.0000 O 0 0 0 0 0 0 0 0 0 0 0 0 25.3125 -1.3232 0.0000 C 0 0 0 0 0 0 0 0 0 0 0 0 24.1619 -1.9847 0.0000 C 0 0 0 0 0 0 0 0 0 0 0 0 23.0401 -1.3232 0.0000 C 0 0 0 0 0 0 0 0 0 0 0 0 21.8320 -1.9847 0.0000 C 0 0 0 0 0 0 0 0 0 0 0 0 20.5089 -1.9847 0.0000 C 0 0 0 0 0 0 0 0 0 0 0 0 19.3…	Ethyl docosahexaenoate	C24 H36 O2	356.272	8007148	36
	FALSE	# ACD/Labs04281712082D 26 25 0 0 0 0 0 0 0 0 1 V2000 16.1565 0.0000 0.0000 O 0 0 0 0 0 0 0 0 0 0 0 0 15.0094 -0.6624 0.0000 C 0 0 0 0 0 0 0 0 0 0 0 0 13.8461 0.0000 0.0000 C 0 0 0 0 0 0 0 0 0 0 0 0 12.6990 -0.6624 0.0000 C 0 0 0 0 0 0 0 0 0 0 0 0 11.5357 0.0000 0.0000 C 0 0 0 0 0 0 0 0 0 0 0 0 8.0783 -1.9872 0.0000 C 0 0 0 0 0 0 0 0 0 0 0 0 9.2254 -2.6658 0.0000 C 0 0 0 0 0 0 0 0 0 0 0 0 9.2254 -…	Nisinic acid	C24 H36 O2	356.272	9967286	23
	FALSE	# ACD/Labs06110721142D 26 25 0 0 0 0 0 0 0 0 1 V2000 0.0000 -13.8094 0.0000 C 0 0 0 0 0 0 0 0 0 0 0 0 1.3403 -13.8094 0.0000 C 0 0 0 0 0 0 0 0 0 0 0 0 1.9865 -12.6607 0.0000 C 0 0 0 0 0 0 0 0 0 0 0 0 3.3267 -12.6607 0.0000 C 0 0 0 0 0 0 0 0 0 0 0 0 3.9968 -11.5119 0.0000 C 0 0 0 0 0 0 0 0 0 0 0 0 5.3132 -11.5119 0.0000 C 0 0 0 0 0 0 0 0 0 0 0 0 5.9833 -10.3631 0.0000 C 0 0 0 0 0 0 0 0 0 0 0 0 7.3…	6,9,12,15,18,21-tetracosahexaenoic acid	C24 H36 O2	356.272	16026330	6
	FALSE	# SciTegic04031415222D 26 25 0 0 0 0 0 0 0 0999 V2000 4.6159 0.0000 0.0000 C 0 0 0 0 0 0 0 0 0 0 0 0 3.4576 -0.6742 0.0000 C 0 0 0 0 0 0 0 0 0 0 0 0 2.2993 0.0000 0.0000 C 0 0 0 0 0 0 0 0 0 0 0 0 1.1583 -0.6742 0.0000 C 0 0 0 0 0 0 0 0 0 0 0 0 1.1583 -2.0054 0.0000 C 0 0 0 0 0 0 0 0 0 0 0 0 0.0000 -2.6624 0.0000 C 0 0 0 0 0 0 0 0 0 0 0 0 0.0000 -3.9936 0.0000 C 0 0 0 0 0 0 0 0 0 0 0 0 1.1583 -4.6…	(7Z,9Z,12Z,15Z,18Z,21Z)-7,9,12,15,18,21-Tetracosahexaenoic acid	C24 H36 O2	356.272	30778537	3
FALSE		C12 H33 N7 O7	Full match	No results		387.246	9.061	6.97886e+08	0	No MS2	368230	11518.7	12322.2	1.33868e+06	1.29419e+06	653167	3.03392e+08	237201	2.94039e+07	5.1325e+08	6.95883e+06	261708	379323	3.12402e+06	88118.6	631840	410727	8.44054e+07	777879	518452	731545	7.51635e+06	659498	334646	94394.7	1.08152e+06	1.13074e+06	443837	4.47308e+06	2.2684e+07	360544	3.53936e+07	3.311e+08	987918	2.41669e+06	87559	928320	896621	6.39303e+06
	Checked	Structure	Name	Formula	Molecular Weight	CSID	# References
FALSE			No results	No results		69.0585	1.075	6.96185e+08	0	No MS2	21108.9	23140.3	23960.1	2.09484e+08	1.86463e+08	2.10252e+07	2.34505e+07	2.03923e+07	4.39089e+07	3.6416e+07	6.18819e+08	2.08399e+07	1.86408e+07	4.89593e+08	1.31247e+06	1.72892e+08	1.74173e+08	1.6778e+07	3.91959e+07	4.98918e+07	4.05745e+07	6.96185e+08	2.92232e+08	2.34621e+07	2.16723e+06	2.12559e+08	1.92891e+08	1.90866e+07	5.47997e+08	7.64187e+07	1.83764e+07	3.93233e+07	1.62277e+07	1.58347e+07	1.47746e+08	5.25292e+06	1.94406e+08	1.93589e+08	6.03468e+08
	Checked	Structure	Name	Formula	Molecular Weight	CSID	# References
FALSE	Naphthalen-2-amine	C10 H9 N	Full match	Full match		143.073	7.855	6.94847e+08	4	No MS2	534891	13751.4	13890.2	4.66399e+07	5.42083e+07	1.61724e+07	7.4176e+06	8.74227e+06	1.11135e+07	1.24531e+07	1.48762e+07	1.16376e+07	1.44881e+07	1.47739e+07	90848.9	4.17e+07	3.81409e+07	1.01677e+07	8.22892e+06	9.62363e+06	1.70646e+07	1.75009e+07	1.84532e+08	1.29205e+07	101861	5.01118e+07	4.68591e+07	1.29481e+07	1.55506e+07	553772	1.14638e+07	1.05678e+07	8.27301e+06	1.40624e+07	9.33324e+06	86363.4	4.96667e+07	4.09434e+07	9.99636e+06
	Checked	Structure	Name	Formula	Molecular Weight	CSID	# References
	FALSE	# ACD/Labs04281713052D 11 12 0 0 0 0 0 0 0 0 1 V2000 0.0000 0.0000 0.0000 N 0 0 0 0 0 0 0 0 0 0 0 0 1.1516 -0.6679 0.0000 C 0 0 0 0 0 0 0 0 0 0 0 0 1.1516 -1.9980 0.0000 C 0 0 0 0 0 0 0 0 0 0 0 0 2.3032 -2.6601 0.0000 C 0 0 0 0 0 0 0 0 0 0 0 0 3.4547 -1.9980 0.0000 C 0 0 0 0 0 0 0 0 0 0 0 0 4.6063 -2.6601 0.0000 C 0 0 0 0 0 0 0 0 0 0 0 0 5.7579 -1.9980 0.0000 C 0 0 0 0 0 0 0 0 0 0 0 0 5.7579 -0.6…	Naphthalen-2-amine	C10 H9 N	143.073	6790	573
	FALSE	# ACD/Labs03221914022D 11 12 0 0 0 0 0 0 0 0 1 V2000 0.0000 -3.3228 0.0000 C 0 0 0 0 0 0 0 0 0 0 0 0 0.0000 -1.9909 0.0000 C 0 0 0 0 0 0 0 0 0 0 0 0 1.1522 -1.3273 0.0000 C 0 0 0 0 0 0 0 0 0 0 0 0 2.3043 -1.9909 0.0000 C 0 0 0 0 0 0 0 0 0 0 0 0 2.3043 -3.3228 0.0000 C 0 0 0 0 0 0 0 0 0 0 0 0 1.1522 -3.9865 0.0000 C 0 0 0 0 0 0 0 0 0 0 0 0 3.4565 -3.9865 0.0000 C 0 0 0 0 0 0 0 0 0 0 0 0 4.6087 -3.…	naphthylamine	C10 H9 N	143.073	8319	426
	FALSE	# ACD/Labs04281711492D 11 12 0 0 0 0 0 0 0 0 1 V2000 0.0000 -2.6606 0.0000 C 0 0 0 0 0 0 0 0 0 0 0 0 1.1518 -1.9983 0.0000 C 0 0 0 0 0 0 0 0 0 0 0 0 1.1518 -0.6680 0.0000 C 0 0 0 0 0 0 0 0 0 0 0 0 2.3036 0.0000 0.0000 C 0 0 0 0 0 0 0 0 0 0 0 0 3.4554 -0.6680 0.0000 C 0 0 0 0 0 0 0 0 0 0 0 0 4.6071 0.0000 0.0000 C 0 0 0 0 0 0 0 0 0 0 0 0 5.7589 -0.6680 0.0000 C 0 0 0 0 0 0 0 0 0 0 0 0 5.7589 -1.99…	Quinaldine	C10 H9 N	143.073	13870160	288
	FALSE	# ACD/Labs04281711052D 11 12 0 0 0 0 0 0 0 0 1 V2000 0.0000 -2.6606 0.0000 C 0 0 0 0 0 0 0 0 0 0 0 0 1.1518 -1.9983 0.0000 C 0 0 0 0 0 0 0 0 0 0 0 0 1.1518 -0.6680 0.0000 C 0 0 0 0 0 0 0 0 0 0 0 0 2.3036 0.0000 0.0000 C 0 0 0 0 0 0 0 0 0 0 0 0 3.4554 -0.6680 0.0000 C 0 0 0 0 0 0 0 0 0 0 0 0 4.6071 0.0000 0.0000 N 0 0 0 0 0 0 0 0 0 0 0 0 5.7589 -0.6680 0.0000 C 0 0 0 0 0 0 0 0 0 0 0 0 5.7589 -1.99…	2744	C10 H9 N	143.073	6792	214
FALSE	Epirizole	C11 H14 N4 O2	Full match	Full match		234.111	2.041	6.94486e+08	1	No MS2	47044.5	46916.5	256033	5.7459e+08	5.64014e+08	5.59659e+08	2.80335e+08	3.8153e+08	3.47549e+08	4.67844e+08	5.38115e+08	3.43069e+08	5.63217e+08	4.52787e+08	369375	4.97965e+08	4.30099e+08	4.15137e+08	4.17495e+08	3.49544e+08	5.59246e+08	4.97838e+08	6.18665e+08	5.97713e+08	410176	6.01197e+08	5.67601e+08	5.95305e+08	5.58164e+08	7.38378e+06	4.4632e+08	3.13433e+08	4.06223e+08	5.93126e+08	3.97772e+08	400066	5.55666e+08	5.52671e+08	4.38637e+08
	Checked	Structure	Name	Formula	Molecular Weight	CSID	# References
	FALSE	# ACD/Labs04281710402D 17 18 0 0 0 0 0 0 0 0 1 V2000 1.0031 -2.3547 0.0000 O 0 0 0 0 0 0 0 0 0 0 0 0 1.1454 -7.1069 0.0000 O 0 0 0 0 0 0 0 0 0 0 0 0 3.4147 -3.1444 0.0000 N 0 0 0 0 0 0 0 0 0 0 0 0 4.5103 -2.3476 0.0000 N 0 0 0 0 0 0 0 0 0 0 0 0 2.2765 -5.1363 0.0000 N 0 0 0 0 0 0 0 0 0 0 0 0 4.5672 -5.1363 0.0000 N 0 0 0 0 0 0 0 0 0 0 0 0 3.4147 -4.4676 0.0000 C 0 0 0 0 0 0 0 0 0 0 0 0 2.3192 -2.…	Epirizole	C11 H14 N4 O2	234.112	3129	108
FALSE	N-acetyl-L-2-aminoadipic acid	C8 H13 N O5	Full match	Full match		203.079	1.624	6.91943e+08	2	No MS2	118671	120831	544976	2.38467e+08	2.29184e+08	4.13743e+08	7.75732e+06	3.05399e+08	5.01447e+06	1.13392e+07	4.26226e+07	5.25083e+06	4.86786e+08	8.70735e+06	925360	2.33278e+08	1.88415e+08	4.05119e+06	6.7263e+06	2.83186e+08	7.74406e+06	1.70097e+07	6.30605e+08	5.57459e+06	1.13579e+06	2.27051e+08	2.72958e+08	5.54551e+08	2.4408e+08	1.47529e+07	5.0156e+06	4.29579e+06	3.15088e+08	3.74816e+08	4.46307e+08	1.02233e+06	2.41535e+08	2.40157e+08	1.604e+07
	Checked	Structure	Name	Formula	Molecular Weight	CSID	# References
	FALSE	# ACD/Labs04221415492D 14 13 0 0 1 0 0 0 0 0 1 V2000 1.1443 -5.3346 0.0000 O 0 0 0 0 0 0 0 0 0 0 0 0 0.0000 -3.3442 0.0000 O 0 0 0 0 0 0 0 0 0 0 0 0 1.1362 0.0000 0.0000 O 0 0 0 0 0 0 0 0 0 0 0 0 6.9060 -2.0226 0.0000 O 0 0 0 0 0 0 0 0 0 0 0 0 8.0583 -4.0211 0.0000 O 0 0 0 0 0 0 0 0 0 0 0 0 2.2805 -1.9985 0.0000 N 0 0 0 0 0 0 0 0 0 0 0 0 2.2805 -3.3523 0.0000 C 0 0 0 0 0 0 0 0 0 0 0 0 1.1443 -4.0…	N-acetyl-L-2-aminoadipic acid	C8 H13 N O5	203.079	392027	6
	FALSE	# ACD/Labs02220714542D 14 13 0 0 0 0 0 0 0 0 1 V2000 6.9087 0.0000 0.0000 O 0 0 0 0 0 0 0 0 0 0 0 0 6.9087 -1.3302 0.0000 C 0 0 0 0 0 0 0 0 0 0 0 0 8.0615 -1.9993 0.0000 O 0 0 0 0 0 0 0 0 0 0 0 0 5.7559 -1.9993 0.0000 C 0 0 0 0 0 0 0 0 0 0 0 0 5.7559 -3.3294 0.0000 N 0 0 0 0 0 0 0 0 0 0 0 0 6.9087 -3.9905 0.0000 C 0 0 0 0 0 0 0 0 0 0 0 0 6.9087 -5.3206 0.0000 O 0 0 0 0 0 0 0 0 0 0 0 0 4.6031 -1.3…	2-Acetamidohexanedioic acid	C8 H13 N O5	203.079	10382613	5
FALSE			No results	No results		95.9308	0.954	6.76529e+08	0	No MS2	54300.9	45734.6	450527	1.10431e+08	1.11177e+08	1.74285e+08	1.5552e+08	1.51148e+08	1.50852e+08	1.49368e+08	1.17831e+08	1.74229e+08	1.73816e+08	1.20384e+08	520377	1.04647e+08	9.43478e+07	1.65979e+08	1.55952e+08	1.32054e+08	1.42908e+08	1.44766e+08	6.14915e+06	1.56419e+08	563216	1.13288e+08	1.05629e+08	1.76163e+08	1.28883e+08	5.86097e+06	1.58457e+08	1.48773e+08	1.60487e+08	1.71333e+08	2.24387e+08	503119	1.11371e+08	1.10694e+08	1.52807e+08
	Checked	Structure	Name	Formula	Molecular Weight	CSID	# References
FALSE		C25 H49 N5 O9	Full match	No results		563.35	10.24	6.75494e+08	0	No MS2	171240	12232.7	360896	184295	173152	165857	3.72364e+08	138744	6.83964e+07	5.81909e+08	1.38789e+06	112380	155676	555408	109249	184575	148872	1.58405e+08	163094	124039	163510	1.62753e+06	262896	122886	131932	178061	238291	162938	1.23696e+06	2.98974e+07	151295	8.49623e+07	4.46446e+08	166442	2.41869e+06	111136	206229	242626	1.1234e+06
	Checked	Structure	Name	Formula	Molecular Weight	CSID	# References
FALSE	Leu-Leu	C12 H24 N2 O3	Full match	Full match		244.178	8.563	6.75199e+08	5	No MS2	495296	30168.5	171187	2.17691e+08	2.49418e+08	4.09526e+08	1.12414e+08	1.87007e+08	2.77353e+08	2.93036e+08	3.76345e+08	3.08054e+08	3.07676e+08	3.09882e+08	299748	1.58505e+08	1.36495e+08	3.66862e+08	5.33305e+08	3.10103e+08	6.36652e+08	5.52003e+08	3.88495e+06	3.99395e+08	318348	2.34632e+08	2.64657e+08	3.12493e+08	4.59559e+08	1.53718e+07	4.21394e+08	2.66613e+08	1.85754e+08	1.94059e+08	6.80188e+07	321834	2.51438e+08	2.53019e+08	6.33615e+08
	Checked	Structure	Name	Formula	Molecular Weight	CSID	# References
	FALSE	# ACD/Labs04221415492D 17 16 0 0 0 0 0 0 0 0 1 V2000 2.3666 -5.3194 0.0000 O 0 0 0 0 0 0 0 0 0 0 0 0 5.7590 -2.0076 0.0000 O 0 0 0 0 0 0 0 0 0 0 0 0 6.9240 -3.9932 0.0000 O 0 0 0 0 0 0 0 0 0 0 0 0 3.4584 -3.3338 0.0000 N 0 0 0 0 0 0 0 0 0 0 0 0 0.0000 -3.9932 0.0000 N 0 0 0 0 0 0 0 0 0 0 0 0 4.6160 -4.0006 0.0000 C 0 0 0 0 0 0 0 0 0 0 0 0 2.3080 -3.9932 0.0000 C 0 0 0 0 0 0 0 0 0 0 0 0 1.1503 -3.…	Leu-Leu	C12 H24 N2 O3	244.179	85053	73
	FALSE	# ACD/Labs04221415492D 17 16 0 0 0 0 0 0 0 0 1 V2000 6.9367 -3.3393 0.0000 O 0 0 0 0 0 0 0 0 0 0 0 0 15.0026 0.0000 0.0000 O 0 0 0 0 0 0 0 0 0 0 0 0 16.1318 -2.0003 0.0000 O 0 0 0 0 0 0 0 0 0 0 0 0 8.0659 -1.3389 0.0000 N 0 0 0 0 0 0 0 0 0 0 0 0 0.0000 -2.0003 0.0000 N 0 0 0 0 0 0 0 0 0 0 0 0 6.9367 -2.0003 0.0000 C 0 0 0 0 0 0 0 0 0 0 0 0 5.7268 -1.3389 0.0000 C 0 0 0 0 0 0 0 0 0 0 0 0 9.1951 -2…	6-[(6-Aminohexanoyl)amino]hexanoic acid	C12 H24 N2 O3	244.179	871	40
	FALSE	#435718 -OEChem-02070708252D 41 40 0 1 0 0 0 0 0999 V2000 6.3301 -1.4400 0.0000 O 0 0 0 0 0 0 0 0 0 0 0 0 3.7321 -1.9400 0.0000 O 0 0 0 0 0 0 0 0 0 0 0 0 5.4641 -1.9400 0.0000 O 0 0 0 0 0 0 0 0 0 0 0 0 5.4641 0.0600 0.0000 N 0 0 0 0 0 0 0 0 0 0 0 0 8.0622 -0.4400 0.0000 N 0 0 0 0 0 0 0 0 0 0 0 0 3.7321 0.0600 0.0000 C 0 0 3 0 0 0 0 0 0 0 0 0 4.5981 -0.4400 0.0000 C 0 0 3 0 0 0 0 0 0 0 0 0 7.1962 …	leu-ile	C12 H24 N2 O3	244.179	385345	10
	FALSE	# ACD/Labs01300718572D 17 16 0 0 0 0 0 0 0 0 2 V2000 4.6340 -3.4477 0.0000 C 0 0 0 0 0 0 0 0 0 0 0 0 3.9732 -2.2931 0.0000 N 0 0 0 0 0 0 0 0 0 0 0 0 2.6514 -2.3091 0.0000 C 0 0 0 0 0 0 0 0 0 0 0 0 1.9906 -3.4477 0.0000 C 0 0 0 0 0 0 0 0 0 0 0 0 5.9637 -3.4477 0.0000 C 0 0 0 0 0 0 0 0 0 0 0 0 6.6405 -4.6022 0.0000 N 0 3 0 0 0 0 0 0 0 0 0 0 3.9732 -4.5942 0.0000 O 0 0 0 0 0 0 0 0 0 0 0 0 0.6529 -3.…	Ile-Ile	C12 H24 N2 O3	244.179	10439627	9
	FALSE	# ACD/Labs05010700192D 17 16 0 0 0 0 0 0 0 0 1 V2000 2.5048 -6.5060 0.0000 C 0 0 0 0 0 0 0 0 0 0 0 0 3.7540 -6.5060 0.0000 C 0 0 0 0 0 0 0 0 0 0 0 0 4.3851 -5.4195 0.0000 C 0 0 0 0 0 0 0 0 0 0 0 0 5.6342 -5.4195 0.0000 C 0 0 0 0 0 0 0 0 0 0 0 0 3.7540 -4.3395 0.0000 C 0 0 0 0 0 0 0 0 0 0 0 0 4.3851 -3.2530 0.0000 C 0 0 0 0 0 0 0 0 0 0 0 0 5.6342 -3.2530 0.0000 O 0 0 0 0 0 0 0 0 0 0 0 0 3.7540 -2.…	ile-leu	C12 H24 N2 O3	244.179	14526373	7
FALSE			No results	No results		79.9411	0.935	6.72586e+08	0	No MS2	17845.1	19502.4	21744.9	1.17091e+08	1.19225e+08	2.25174e+08	1.30079e+08	1.537e+08	1.28034e+08	1.91814e+08	6.68894e+07	1.43272e+08	2.09029e+08	7.28249e+07	124759	9.3625e+07	7.66748e+07	1.85826e+08	1.41328e+08	1.03094e+08	1.7749e+08	8.48456e+07	1.31963e+07	1.86674e+08	133208	1.13033e+08	1.08288e+08	1.9689e+08	8.47862e+07	1.06381e+06	1.946e+08	1.18111e+08	1.44777e+08	1.87624e+08	2.76403e+08	142634	1.18742e+08	1.11225e+08	9.68208e+07
	Checked	Structure	Name	Formula	Molecular Weight	CSID	# References
FALSE		C8 H16 Cl N O6	Full match	No results		257.066	1.054	6.61516e+08	0	No MS2	38587.9	33280.3	327842	6.57639e+08	6.61516e+08	3.30876e+07	3.20604e+07	3.47149e+07	3.37979e+07	7.31468e+07	2.61157e+08	4.04331e+07	3.56254e+07	3.01317e+08	349104	5.20126e+08	4.02078e+08	4.88808e+07	7.95135e+07	2.35474e+07	5.85707e+07	8.4998e+07	1.3193e+08	5.97573e+07	394832	5.91011e+08	5.39177e+08	3.62326e+07	8.88676e+07	4.26494e+06	4.7432e+07	3.14589e+07	2.52399e+07	4.9814e+07	6.20488e+07	375968	5.4267e+08	5.53741e+08	5.22054e+07
	Checked	Structure	Name	Formula	Molecular Weight	CSID	# References
FALSE	15,16-DiHODE	C18 H32 O4	Full match	Full match		312.229	14.884	6.60678e+08	18	No MS2	234494	37427.2	239603	8.12747e+07	8.62217e+07	474310	220756	299436	230794	378699	6.60678e+08	267581	356446	2.72687e+08	352646	5.40238e+07	5.41575e+07	375901	4.43907e+07	2.65453e+07	482760	3.92982e+08	397224	390878	415809	8.01283e+07	7.21866e+07	412681	6.1161e+08	399273	444929	258308	292966	520964	396559	383273	7.53792e+07	7.14334e+07	3.54408e+08
	Checked	Structure	Name	Formula	Molecular Weight	CSID	# References
	FALSE	#16061068 -OEChem-09010708452D 54 53 0 1 0 0 0 0 0999 V2000 6.0010 -5.4050 0.0000 O 0 0 0 0 0 0 0 0 0 0 0 0 6.8671 -2.9050 0.0000 O 0 0 0 0 0 0 0 0 0 0 0 0 6.8671 5.0950 0.0000 O 0 0 0 0 0 0 0 0 0 0 0 0 5.1350 5.0950 0.0000 O 0 0 0 0 0 0 0 0 0 0 0 0 4.2690 1.5950 0.0000 C 0 0 0 0 0 0 0 0 0 0 0 0 4.2690 0.5950 0.0000 C 0 0 0 0 0 0 0 0 0 0 0 0 5.1350 2.0950 0.0000 C 0 0 0 0 0 0 0 0 0 0 0 0 3.4030 0…	15,16-DiHODE	C18 H32 O4	312.23	17220751	105
	FALSE	#16061066 -OEChem-09010708452D 54 53 0 1 0 0 0 0 0999 V2000 6.8671 -0.0950 0.0000 O 0 0 0 0 0 0 0 0 0 0 0 0 6.0010 -2.5950 0.0000 O 0 0 0 0 0 0 0 0 0 0 0 0 14.6613 -1.5950 0.0000 O 0 0 0 0 0 0 0 0 0 0 0 0 13.7953 -0.0950 0.0000 O 0 0 0 0 0 0 0 0 0 0 0 0 7.7331 -1.5950 0.0000 C 0 0 0 0 0 0 0 0 0 0 0 0 8.5991 -1.0950 0.0000 C 0 0 0 0 0 0 0 0 0 0 0 0 6.8671 -1.0950 0.0000 C 0 0 3 0 0 0 0 0 0 0 0 0 9…	9,10-DiHODE	C18 H32 O4	312.23	17220749	100
	FALSE	#16061067 -OEChem-09010708452D 54 53 0 1 0 0 0 0 0999 V2000 8.9282 -4.1550 0.0000 O 0 0 0 0 0 0 0 0 0 0 0 0 9.7942 -1.6550 0.0000 O 0 0 0 0 0 0 0 0 0 0 0 0 2.8660 4.3450 0.0000 O 0 0 0 0 0 0 0 0 0 0 0 0 2.0000 2.8450 0.0000 O 0 0 0 0 0 0 0 0 0 0 0 0 5.4641 -0.1550 0.0000 C 0 0 0 0 0 0 0 0 0 0 0 0 4.5981 0.3450 0.0000 C 0 0 0 0 0 0 0 0 0 0 0 0 5.4641 -1.1550 0.0000 C 0 0 0 0 0 0 0 0 0 0 0 0 4.5981…	12,13-DiHODE	C18 H32 O4	312.23	17220750	99
	FALSE	# ACD/Labs04221415492D 22 21 0 0 1 0 0 0 0 0 1 V2000 10.4044 -1.9928 0.0000 O 0 0 0 0 0 0 0 0 0 0 0 0 9.2506 -2.6640 0.0000 O 0 0 0 0 0 0 0 0 0 0 0 0 1.1327 -1.9928 0.0000 O 0 0 0 0 0 0 0 0 0 0 0 0 0.0000 0.0000 0.0000 O 0 0 0 0 0 0 0 0 0 0 0 0 10.4044 -0.6712 0.0000 C 0 0 0 0 0 0 0 0 0 0 0 0 9.2087 0.0000 0.0000 C 0 0 0 0 0 0 0 0 0 0 0 0 11.6210 -0.0629 0.0000 C 0 0 0 0 0 0 0 0 0 0 0 0 8.0760 -0…	9(S)-HPODE	C18 H32 O4	312.23	7827800	96
	FALSE	#6439847 -OEChem-02070710342D 54 53 0 1 0 0 0 0 0999 V2000 10.3312 -0.4400 0.0000 O 0 0 0 0 0 0 0 0 0 0 0 0 9.4651 0.0600 0.0000 O 0 0 0 0 0 0 0 0 0 0 0 0 2.5369 -1.9400 0.0000 O 0 0 0 0 0 0 0 0 0 0 0 0 3.4030 -0.4400 0.0000 O 0 0 0 0 0 0 0 0 0 0 0 0 7.7331 -1.9400 0.0000 C 0 0 0 0 0 0 0 0 0 0 0 0 6.8671 -1.4400 0.0000 C 0 0 0 0 0 0 0 0 0 0 0 0 8.5991 -1.4400 0.0000 C 0 0 0 0 0 0 0 0 0 0 0 0 6.00…	(10E,12Z)-9-Hydroperoxy-10,12-octadecadienoic acid	C18 H32 O4	312.23	4944227	48
	FALSE	# ACD/Labs04221415492D 22 21 0 0 1 0 0 0 0 0 1 V2000 15.1441 -3.3213 0.0000 O 0 0 0 0 0 0 0 0 0 0 0 0 16.2930 -3.9897 0.0000 O 0 0 0 0 0 0 0 0 0 0 0 0 1.1489 0.0000 0.0000 O 0 0 0 0 0 0 0 0 0 0 0 0 0.0000 -2.0053 0.0000 O 0 0 0 0 0 0 0 0 0 0 0 0 15.1441 -2.0053 0.0000 C 0 0 0 0 0 0 0 0 0 0 0 0 13.9952 -1.3369 0.0000 C 0 0 0 0 0 0 0 0 0 0 0 0 16.2930 -1.3369 0.0000 C 0 0 0 0 0 0 0 0 0 0 0 0 12.825…	13(S)-HPODE	C18 H32 O4	312.23	4444304	36
	FALSE	#5283009 -OEChem-02070710102D 54 53 0 1 0 0 0 0 0999 V2000 6.3301 1.0950 0.0000 O 0 0 0 0 0 0 0 0 0 0 0 0 8.9282 -1.4050 0.0000 O 0 0 0 0 0 0 0 0 0 0 0 0 17.5885 -0.4050 0.0000 O 0 0 0 0 0 0 0 0 0 0 0 0 16.7224 1.0950 0.0000 O 0 0 0 0 0 0 0 0 0 0 0 0 12.3923 -0.4050 0.0000 C 0 0 0 0 0 0 0 0 0 0 0 0 13.2583 0.0950 0.0000 C 0 0 0 0 0 0 0 0 0 0 0 0 11.5263 0.0950 0.0000 C 0 0 0 0 0 0 0 0 0 0 0 0 14.…	13-Hydroxy-10-oxo-11-octadecenoic acid	C18 H32 O4	312.23	4446136	17
	FALSE	# ACD/Labs04221415492D 22 21 0 0 1 0 0 0 0 0 1 V2000 9.2318 -3.2955 0.0000 O 0 0 0 0 0 0 0 0 0 0 0 0 10.3937 -3.9716 0.0000 O 0 0 0 0 0 0 0 0 0 0 0 0 1.1408 0.0000 0.0000 O 0 0 0 0 0 0 0 0 0 0 0 0 0.0000 -1.9858 0.0000 O 0 0 0 0 0 0 0 0 0 0 0 0 9.2318 -1.9647 0.0000 C 0 0 0 0 0 0 0 0 0 0 0 0 8.0699 -1.3098 0.0000 C 0 0 0 0 0 0 0 0 0 0 0 0 10.3937 -1.2886 0.0000 C 0 0 0 0 0 0 0 0 0 0 0 0 6.9291 -1…	8(R)-hydroperoxylinoleic acid	C18 H32 O4	312.23	4943210	13
	FALSE	# ACD/Labs04281711132D 22 21 0 0 0 0 0 0 0 0 1 V2000 1.1036 -0.0216 0.0000 O 0 0 0 0 0 0 0 0 0 0 0 0 21.6393 -1.9259 0.0000 O 0 0 0 0 0 0 0 0 0 0 0 0 0.0000 -2.0341 0.0000 O 0 0 0 0 0 0 0 0 0 0 0 0 20.3842 0.0000 0.0000 O 0 0 0 0 0 0 0 0 0 0 0 0 1.1036 -1.3200 0.0000 C 0 0 0 0 0 0 0 0 0 0 0 0 20.4707 -1.3200 0.0000 C 0 0 0 0 0 0 0 0 0 0 0 0 2.2721 -2.0341 0.0000 C 0 0 0 0 0 0 0 0 0 0 0 0 19.3455 …	octadecenedioic acid	C18 H32 O4	312.23	7822624	13
	FALSE	# ACD/Labs04221415492D 22 23 0 0 0 0 0 0 0 0 1 V2000 10.5371 -2.2078 0.0000 O 0 0 0 0 0 0 0 0 0 0 0 0 13.8889 -2.1676 0.0000 O 0 0 0 0 0 0 0 0 0 0 0 0 1.0637 -1.8866 0.0000 O 0 0 0 0 0 0 0 0 0 0 0 0 0.0000 0.0000 0.0000 O 0 0 0 0 0 0 0 0 0 0 0 0 11.0991 -0.6222 0.0000 C 0 0 0 0 0 0 0 0 0 0 0 0 13.3269 -0.7025 0.0000 C 0 0 0 0 0 0 0 0 0 0 0 0 9.8547 -0.6222 0.0000 C 0 0 0 0 0 0 0 0 0 0 0 0 14.5713…	1,2:4,5-Dianhydro-1-(7-carboxyheptyl)-3-deoxy-5-pentylpentitol	C18 H32 O4	312.23	17165	10
	FALSE	# ACD/Labs04221415492D 22 21 0 0 1 0 0 0 0 0 1 V2000 12.8661 -3.3114 0.0000 O 0 0 0 0 0 0 0 0 0 0 0 0 11.7272 -3.9653 0.0000 O 0 0 0 0 0 0 0 0 0 0 0 0 1.1601 0.0000 0.0000 O 0 0 0 0 0 0 0 0 0 0 0 0 0.0000 -2.0037 0.0000 O 0 0 0 0 0 0 0 0 0 0 0 0 12.8661 -1.9827 0.0000 C 0 0 0 0 0 0 0 0 0 0 0 0 11.7272 -1.3077 0.0000 C 0 0 0 0 0 0 0 0 0 0 0 0 14.0262 -1.3077 0.0000 C 0 0 0 0 0 0 0 0 0 0 0 0 10.398…	(11S)-11-hydroperoxylinoleic acid	C18 H32 O4	312.23	4444494	9
	FALSE	# ACD/Labs04221415492D 22 21 0 0 1 0 0 0 0 0 1 V2000 5.7786 0.0000 0.0000 O 0 0 0 0 0 0 0 0 0 0 0 0 9.2499 -3.3020 0.0000 O 0 0 0 0 0 0 0 0 0 0 0 0 1.1430 0.0000 0.0000 O 0 0 0 0 0 0 0 0 0 0 0 0 0.0000 -1.9897 0.0000 O 0 0 0 0 0 0 0 0 0 0 0 0 5.7786 -1.3123 0.0000 C 0 0 0 0 0 0 0 0 0 0 0 0 9.2499 -1.9685 0.0000 C 0 0 0 0 0 0 0 0 0 0 0 0 6.9427 -1.9685 0.0000 C 0 0 0 0 0 0 0 0 0 0 0 0 8.0857 -1.31…	5(S),8(R)-DiHODE	C18 H32 O4	312.23	22943116	7
	FALSE	# ACD/Labs04221415492D 22 21 0 0 1 0 0 0 0 0 1 V2000 8.0466 0.0000 0.0000 O 0 0 0 0 0 0 0 0 0 0 0 0 9.2052 -3.3282 0.0000 O 0 0 0 0 0 0 0 0 0 0 0 0 1.1585 -0.0211 0.0000 O 0 0 0 0 0 0 0 0 0 0 0 0 0.0000 -2.0222 0.0000 O 0 0 0 0 0 0 0 0 0 0 0 0 8.0466 -1.3481 0.0000 C 0 0 0 0 0 0 0 0 0 0 0 0 9.2052 -2.0011 0.0000 C 0 0 0 0 0 0 0 0 0 0 0 0 6.9091 -2.0011 0.0000 C 0 0 0 0 0 0 0 0 0 0 0 0 10.3426 -1.…	(7S,8S,9Z,12Z)-7,8-Dihydroxy-9,12-octadecadienoic acid	C18 H32 O4	312.23	4573945	7
	FALSE	# ACD/Labs04221415492D 22 22 0 0 1 0 0 0 0 0 1 V2000 14.3056 -1.9937 0.0000 O 0 0 0 0 0 0 0 0 0 0 0 0 9.6398 -2.3432 0.0000 O 0 0 0 0 0 0 0 0 0 0 0 0 1.1510 -2.1376 0.0000 O 0 0 0 0 0 0 0 0 0 0 0 0 0.0000 -0.0617 0.0000 O 0 0 0 0 0 0 0 0 0 0 0 0 13.6684 -0.6577 0.0000 C 0 0 0 0 0 0 0 0 0 0 0 0 15.0044 -0.6577 0.0000 C 0 0 0 0 0 0 0 0 0 0 0 0 12.4351 -0.1233 0.0000 C 0 0 0 0 0 0 0 0 0 0 0 0 16.114…	12,13-Epoxy-9-hydroxy-10-octadecenoate	C18 H32 O4	312.23	10128357	6
	FALSE	# ACD/Labs04221415492D 22 22 0 0 0 0 0 0 0 0 1 V2000 10.6453 -2.2487 0.0000 O 0 0 0 0 0 0 0 0 0 0 0 0 15.3903 -1.9393 0.0000 O 0 0 0 0 0 0 0 0 0 0 0 0 1.1553 -2.1249 0.0000 O 0 0 0 0 0 0 0 0 0 0 0 0 0.0000 -0.0619 0.0000 O 0 0 0 0 0 0 0 0 0 0 0 0 11.3261 -0.7014 0.0000 C 0 0 0 0 0 0 0 0 0 0 0 0 10.0264 -0.7014 0.0000 C 0 0 0 0 0 0 0 0 0 0 0 0 12.4814 -0.1238 0.0000 C 0 0 0 0 0 0 0 0 0 0 0 0 8.933…	8-{3-[(1E)-3-Hydroxy-1-octen-1-yl]-2-oxiranyl}octanoic acid	C18 H32 O4	312.23	4446143	5
	FALSE	# ACD/Labs04221415492D 22 21 0 0 1 0 0 0 0 0 1 V2000 11.5262 -3.2902 0.0000 O 0 0 0 0 0 0 0 0 0 0 0 0 12.6578 -3.9398 0.0000 O 0 0 0 0 0 0 0 0 0 0 0 0 1.1526 0.0000 0.0000 O 0 0 0 0 0 0 0 0 0 0 0 0 0.0000 -1.9699 0.0000 O 0 0 0 0 0 0 0 0 0 0 0 0 11.5262 -1.9490 0.0000 C 0 0 0 0 0 0 0 0 0 0 0 0 10.3735 -1.2784 0.0000 C 0 0 0 0 0 0 0 0 0 0 0 0 12.6578 -1.2993 0.0000 C 0 0 0 0 0 0 0 0 0 0 0 0 9.2209…	(8E,10R,12Z)-10-Hydroperoxy-8,12-octadecadienoic acid	C18 H32 O4	312.23	27471356	4
	FALSE	#5281029 -OEChem-02070710102D 54 53 0 1 0 0 0 0 0999 V2000 8.5991 3.5950 0.0000 O 0 0 0 0 0 0 0 0 0 0 0 0 9.4651 1.0950 0.0000 O 0 0 0 0 0 0 0 0 0 0 0 0 2.5369 2.0950 0.0000 O 0 0 0 0 0 0 0 0 0 0 0 0 3.4030 3.5950 0.0000 O 0 0 0 0 0 0 0 0 0 0 0 0 7.7331 2.0950 0.0000 C 0 0 0 0 0 0 0 0 0 0 0 0 6.8671 2.5950 0.0000 C 0 0 0 0 0 0 0 0 0 0 0 0 8.5991 2.5950 0.0000 C 0 0 2 0 0 0 0 0 0 0 0 0 6.0010 2.09…	(7R,8S,9Z,12Z)-7,8-Dihydroxy-9,12-octadecadienoic acid	C18 H32 O4	312.23	4444497	2
FALSE		C14 H29 N O	Full match	No results		227.225	14.201	6.58258e+08	0	No MS2	115328	11232.2	97375.8	1.17019e+08	1.33901e+08	1.2224e+08	1.7447e+08	4.79906e+07	1.3358e+07	1.91081e+08	6.43464e+08	2.03859e+07	7.7699e+07	3.28512e+08	4.53281e+06	7.1614e+07	8.60071e+07	5.78602e+07	3.84704e+08	4.85731e+08	6.05939e+07	4.78371e+08	5.40702e+07	2.95765e+07	5.0258e+06	9.73762e+07	1.00733e+08	7.69555e+07	6.58258e+08	6.55873e+07	3.13692e+07	4.23063e+07	1.86447e+08	9.2714e+07	3.66836e+07	4.51184e+06	1.12312e+08	1.31119e+08	5.39049e+08
	Checked	Structure	Name	Formula	Molecular Weight	CSID	# References
FALSE			No results	No results		112.957	1.899	6.55636e+08	0	No MS2	124882	123119	129453	2.55436e+07	2.19683e+07	2.81448e+07	1.51783e+07	2.12391e+07	1.54457e+07	4.84274e+06	2.61192e+07	1.64898e+07	2.23488e+07	2.21997e+07	3.28813e+07	1.99807e+07	1.679e+07	1.9171e+07	2.70275e+07	1.38084e+07	2.42266e+07	2.19345e+07	1.13598e+07	4.70766e+06	3.88701e+07	1.9872e+07	2.12162e+07	2.01722e+07	2.91963e+07	1.73539e+07	4.65083e+06	1.55142e+07	1.74664e+07	3.18925e+07	2.09155e+07	2.61729e+07	2.0685e+07	2.21167e+07	2.41287e+07
	Checked	Structure	Name	Formula	Molecular Weight	CSID	# References
FALSE	Leu-Leu	C12 H24 N2 O3	Full match	Full match		244.178	8.696	6.55333e+08	5	No MS2	468359	30665.1	178604	9.62633e+07	7.70032e+07	6.55333e+08	1.58338e+08	2.35113e+08	2.12775e+08	3.5913e+08	4.88568e+08	1.88385e+08	4.81881e+08	2.99677e+08	319385	6.75806e+07	7.87262e+07	4.38043e+08	6.50345e+08	4.87131e+08	4.60553e+08	4.75589e+08	2.07903e+06	3.5501e+08	342057	1.33338e+08	9.97391e+07	4.75716e+08	5.81385e+08	6.57719e+06	2.976e+08	3.39861e+08	1.95469e+08	2.55184e+08	4.94625e+07	328100	1.56627e+08	1.59453e+08	6.00925e+08
	Checked	Structure	Name	Formula	Molecular Weight	CSID	# References
	FALSE	# ACD/Labs04221415492D 17 16 0 0 0 0 0 0 0 0 1 V2000 2.3666 -5.3194 0.0000 O 0 0 0 0 0 0 0 0 0 0 0 0 5.7590 -2.0076 0.0000 O 0 0 0 0 0 0 0 0 0 0 0 0 6.9240 -3.9932 0.0000 O 0 0 0 0 0 0 0 0 0 0 0 0 3.4584 -3.3338 0.0000 N 0 0 0 0 0 0 0 0 0 0 0 0 0.0000 -3.9932 0.0000 N 0 0 0 0 0 0 0 0 0 0 0 0 4.6160 -4.0006 0.0000 C 0 0 0 0 0 0 0 0 0 0 0 0 2.3080 -3.9932 0.0000 C 0 0 0 0 0 0 0 0 0 0 0 0 1.1503 -3.…	Leu-Leu	C12 H24 N2 O3	244.179	85053	73
	FALSE	# ACD/Labs04221415492D 17 16 0 0 0 0 0 0 0 0 1 V2000 6.9367 -3.3393 0.0000 O 0 0 0 0 0 0 0 0 0 0 0 0 15.0026 0.0000 0.0000 O 0 0 0 0 0 0 0 0 0 0 0 0 16.1318 -2.0003 0.0000 O 0 0 0 0 0 0 0 0 0 0 0 0 8.0659 -1.3389 0.0000 N 0 0 0 0 0 0 0 0 0 0 0 0 0.0000 -2.0003 0.0000 N 0 0 0 0 0 0 0 0 0 0 0 0 6.9367 -2.0003 0.0000 C 0 0 0 0 0 0 0 0 0 0 0 0 5.7268 -1.3389 0.0000 C 0 0 0 0 0 0 0 0 0 0 0 0 9.1951 -2…	6-[(6-Aminohexanoyl)amino]hexanoic acid	C12 H24 N2 O3	244.179	871	40
	FALSE	#435718 -OEChem-02070708252D 41 40 0 1 0 0 0 0 0999 V2000 6.3301 -1.4400 0.0000 O 0 0 0 0 0 0 0 0 0 0 0 0 3.7321 -1.9400 0.0000 O 0 0 0 0 0 0 0 0 0 0 0 0 5.4641 -1.9400 0.0000 O 0 0 0 0 0 0 0 0 0 0 0 0 5.4641 0.0600 0.0000 N 0 0 0 0 0 0 0 0 0 0 0 0 8.0622 -0.4400 0.0000 N 0 0 0 0 0 0 0 0 0 0 0 0 3.7321 0.0600 0.0000 C 0 0 3 0 0 0 0 0 0 0 0 0 4.5981 -0.4400 0.0000 C 0 0 3 0 0 0 0 0 0 0 0 0 7.1962 …	leu-ile	C12 H24 N2 O3	244.179	385345	10
	FALSE	# ACD/Labs01300718572D 17 16 0 0 0 0 0 0 0 0 2 V2000 4.6340 -3.4477 0.0000 C 0 0 0 0 0 0 0 0 0 0 0 0 3.9732 -2.2931 0.0000 N 0 0 0 0 0 0 0 0 0 0 0 0 2.6514 -2.3091 0.0000 C 0 0 0 0 0 0 0 0 0 0 0 0 1.9906 -3.4477 0.0000 C 0 0 0 0 0 0 0 0 0 0 0 0 5.9637 -3.4477 0.0000 C 0 0 0 0 0 0 0 0 0 0 0 0 6.6405 -4.6022 0.0000 N 0 3 0 0 0 0 0 0 0 0 0 0 3.9732 -4.5942 0.0000 O 0 0 0 0 0 0 0 0 0 0 0 0 0.6529 -3.…	Ile-Ile	C12 H24 N2 O3	244.179	10439627	9
	FALSE	# ACD/Labs05010700192D 17 16 0 0 0 0 0 0 0 0 1 V2000 2.5048 -6.5060 0.0000 C 0 0 0 0 0 0 0 0 0 0 0 0 3.7540 -6.5060 0.0000 C 0 0 0 0 0 0 0 0 0 0 0 0 4.3851 -5.4195 0.0000 C 0 0 0 0 0 0 0 0 0 0 0 0 5.6342 -5.4195 0.0000 C 0 0 0 0 0 0 0 0 0 0 0 0 3.7540 -4.3395 0.0000 C 0 0 0 0 0 0 0 0 0 0 0 0 4.3851 -3.2530 0.0000 C 0 0 0 0 0 0 0 0 0 0 0 0 5.6342 -3.2530 0.0000 O 0 0 0 0 0 0 0 0 0 0 0 0 3.7540 -2.…	ile-leu	C12 H24 N2 O3	244.179	14526373	7
FALSE	Valylvaline	C10 H20 N2 O3	Full match	Full match		216.147	4.579	6.49183e+08	1	No MS2	1.78589e+06	65990.3	397163	2.25123e+08	2.11318e+08	5.92279e+08	1.77374e+08	2.61646e+08	3.21153e+08	5.06119e+08	5.05119e+08	1.97084e+08	4.79287e+08	3.46564e+08	548603	1.69533e+08	1.54329e+08	4.26235e+08	4.35796e+08	3.35151e+08	6.0403e+08	4.57127e+08	8.39423e+06	3.19309e+08	596036	2.30882e+08	2.43869e+08	3.77279e+08	5.64084e+08	1.96646e+08	3.80356e+08	3.19926e+08	2.66006e+08	1.98076e+08	7.74193e+07	593859	2.29685e+08	2.48267e+08	6.16497e+08
	Checked	Structure	Name	Formula	Molecular Weight	CSID	# References
	FALSE	#409682 -OEChem-02070708252D 35 34 0 1 0 0 0 0 0999 V2000 6.0010 -1.2500 0.0000 O 0 0 0 0 0 0 0 0 0 0 0 0 2.5369 -0.2500 0.0000 O 0 0 0 0 0 0 0 0 0 0 0 0 3.4030 1.2500 0.0000 O 0 0 0 0 0 0 0 0 0 0 0 0 5.1350 0.2500 0.0000 N 0 0 0 0 0 0 0 0 0 0 0 0 7.7331 -0.2500 0.0000 N 0 0 0 0 0 0 0 0 0 0 0 0 4.2690 -0.2500 0.0000 C 0 0 3 0 0 0 0 0 0 0 0 0 4.2690 -1.2500 0.0000 C 0 0 0 0 0 0 0 0 0 0 0 0 6.8671 …	Valylvaline	C10 H20 N2 O3	216.147	362559	50
FALSE			No results	No results		282.274	15.423	6.41285e+08	0	No MS2	91512.4	10748.8	71247.6	1.61298e+08	1.41319e+08	8.93394e+07	1.44438e+08	2.59915e+07	4.94154e+06	2.21197e+08	6.41285e+08	8.98892e+06	5.56803e+07	3.39881e+08	421132	9.30874e+07	7.28343e+07	3.33957e+07	3.71047e+08	1.35418e+08	4.59056e+07	5.94045e+08	1.8557e+07	1.26751e+07	410869	1.42314e+08	1.22633e+08	5.5047e+07	6.05662e+08	1.88064e+07	1.60545e+07	2.69343e+07	1.3217e+08	6.13802e+07	1.10881e+07	510783	1.16046e+08	1.59245e+08	5.93581e+08
	Checked	Structure	Name	Formula	Molecular Weight	CSID	# References
FALSE	Cytosine	C4 H5 N3 O	Full match	Full match		111.043	1.024	6.3655e+08	2	No MS2	12877.5	12715.3	15739.6	1.15398e+08	1.07904e+08	8.60623e+07	1.21116e+08	9.32857e+07	2.05966e+07	5.54479e+07	1.10754e+08	6.43165e+07	7.79194e+07	6.16477e+07	862807	1.02734e+08	9.87911e+07	7.11864e+07	7.94556e+07	1.03528e+08	4.19814e+07	8.31757e+07	4.14228e+08	2.71559e+07	1.18528e+06	1.05588e+08	1.05559e+08	6.88842e+07	7.69692e+07	7.4408e+06	8.23692e+07	4.86719e+07	5.09665e+07	1.0701e+08	6.27201e+06	2.29737e+06	1.08843e+08	1.03943e+08	8.18458e+07
	Checked	Structure	Name	Formula	Molecular Weight	CSID	# References
	FALSE	# ACD/Labs04281710322D 8 8 0 0 0 0 0 0 0 0 1 V2000 3.4581 0.0000 0.0000 N 0 0 0 0 0 0 0 0 0 0 0 0 2.3067 -0.6676 0.0000 C 0 0 0 0 0 0 0 0 0 0 0 0 2.3067 -1.9989 0.0000 N 0 0 0 0 0 0 0 0 0 0 0 0 1.1554 -2.6665 0.0000 C 0 0 0 0 0 0 0 0 0 0 0 0 1.1554 -3.9978 0.0000 O 0 0 0 0 0 0 0 0 0 0 0 0 0.0000 -1.9989 0.0000 N 0 0 0 0 0 0 0 0 0 0 0 0 0.0040 -0.6756 0.0000 C 0 0 0 0 0 0 0 0 0 0 0 0 1.1554 -0.008…	Cytosine	C4 H5 N3 O	111.043	577	6109
	FALSE	# ACLJDraw02231513542D 8 9 0 0 0 0 0 0 0 0999 V2000 0.3699 -4.6822 0.0000 O 0 0 0 0 0 0 0 0 0 0 0 0 0.7819 -3.4180 0.0000 C 0 0 0 0 0 0 0 0 0 0 0 0 2.0461 -3.0060 0.0000 N 0 0 0 0 0 0 0 0 0 0 0 0 3.1980 -2.3411 0.0000 C 0 0 0 0 0 0 0 0 0 0 0 0 2.0461 -1.6762 0.0000 C 0 0 0 0 0 0 0 0 0 0 0 0 0.7819 -1.2642 0.0000 C 0 0 0 0 0 0 0 0 0 0 0 0 0.3699 0.0000 0.0000 N 0 0 0 0 0 0 0 0 0 0 0 0 0.0000 -2.34…	Imexon	C4 H5 N3 O	111.043	62031	82
FALSE	Oryzalin metabolite	C6 H14 N2 O	Full match	Full match		130.111	1.357	6.30177e+08	2	No MS2	71149.2	81459.6	84217.8	3.27379e+08	1.38629e+08	6.13269e+07	1.04253e+08	3.52527e+08	1.07829e+08	4.08804e+08	6.84636e+07	1.67741e+08	6.30177e+08	1.35283e+08	5.60116e+06	2.36205e+08	3.23869e+07	3.48847e+07	5.0142e+07	1.47081e+08	8.49335e+07	7.68746e+07	1.0246e+08	1.39144e+08	5.90999e+06	2.43867e+08	6.55439e+07	2.25693e+08	1.27004e+08	8.77764e+06	2.66829e+08	1.34492e+08	3.51237e+07	2.7852e+08	1.64775e+08	5.24925e+06	2.47686e+08	1.83646e+08	4.42605e+07
	Checked	Structure	Name	Formula	Molecular Weight	CSID	# References
	FALSE	# ACD/Labs04281711282D 9 8 0 0 0 0 0 0 0 0 1 V2000 4.6105 0.0000 0.0000 O 0 0 0 0 0 0 0 0 0 0 0 0 3.4459 -2.0124 0.0000 N 0 0 0 0 0 0 0 0 0 0 0 0 3.4459 -0.6685 0.0000 N 0 0 0 0 0 0 0 0 0 0 0 0 4.6105 -2.6809 0.0000 C 0 0 0 0 0 0 0 0 0 0 0 0 2.2812 -2.6809 0.0000 C 0 0 0 0 0 0 0 0 0 0 0 0 1.1371 -2.0193 0.0000 C 0 0 0 0 0 0 0 0 0 0 0 0 5.7546 -2.0193 0.0000 C 0 0 0 0 0 0 0 0 0 0 0 0 0.0000 -2.674…	Oryzalin metabolite	C6 H14 N2 O	130.111	11632	260
	FALSE	# ACD/Labs06251410062D 9 8 0 0 0 0 0 0 0 0 1 V2000 0.0000 -6.9183 0.0000 C 0 0 0 0 0 0 0 0 0 0 0 0 1.3320 -6.9183 0.0000 C 0 0 0 0 0 0 0 0 0 0 0 0 1.9939 -8.0727 0.0000 O 0 0 0 0 0 0 0 0 0 0 0 0 1.9939 -5.7639 0.0000 N 0 0 0 0 0 0 0 0 0 0 0 0 1.3320 -4.6095 0.0000 C 0 0 0 0 0 0 0 0 0 0 0 0 1.9939 -3.4632 0.0000 C 0 0 0 0 0 0 0 0 0 0 0 0 1.3320 -2.3088 0.0000 C 0 0 0 0 0 0 0 0 0 0 0 0 1.9939 -1.15…	MFCD10024834	C6 H14 N2 O	130.111	109095	167
FALSE	1,3,3-Trimethyl-2-oxabicyclo[2.2.2]octane-6,7-diol	C10 H18 O3	No results	Full match		186.125	11.456	6.25843e+08	20	No MS2	534643	55109.6	765377	8.42987e+07	8.69617e+07	1.66461e+06	2.06882e+06	930234	806869	2.25203e+06	6.08389e+08	948924	1.61875e+06	4.47603e+08	827791	6.51107e+07	5.16495e+07	1.8835e+06	8.55551e+07	5.35932e+07	1.65826e+06	3.94408e+08	1.42155e+06	1.70858e+06	894261	8.32169e+07	7.54145e+07	1.32798e+06	4.34308e+08	1.21029e+06	1.02451e+06	798531	2.02966e+06	1.35382e+06	970663	844791	7.15943e+07	7.62298e+07	4.46866e+08
	Checked	Structure	Name	Formula	Molecular Weight	CSID	# References
	FALSE	# ACD/Labs04221415492D 13 14 0 0 0 0 0 0 0 0 1 V2000 3.8137 -2.6595 0.0000 O 0 0 0 0 0 0 0 0 0 0 0 0 0.0000 -1.8667 0.0000 O 0 0 0 0 0 0 0 0 0 0 0 0 2.7950 0.0000 0.0000 O 0 0 0 0 0 0 0 0 0 0 0 0 2.5692 -2.3986 0.0000 C 0 0 0 0 0 0 0 0 0 0 0 0 3.8137 -3.7735 0.0000 C 0 0 0 0 0 0 0 0 0 0 0 0 2.4387 -3.3771 0.0000 C 0 0 0 0 0 0 0 0 0 0 0 0 0.9283 -2.7900 0.0000 C 0 0 0 0 0 0 0 0 0 0 0 0 2.3033 -1.2…	1,3,3-Trimethyl-2-oxabicyclo[2.2.2]octane-6,7-diol	C10 H18 O3	186.126	102967	53
	FALSE	# ACD/Labs04221415492D 13 13 0 0 0 0 0 0 0 0 1 V2000 3.4731 0.0000 0.0000 O 0 0 0 0 0 0 0 0 0 0 0 0 2.3077 -3.3411 0.0000 O 0 0 0 0 0 0 0 0 0 0 0 0 4.6270 -3.3353 0.0000 O 0 0 0 0 0 0 0 0 0 0 0 0 2.3020 -0.6774 0.0000 C 0 0 0 0 0 0 0 0 0 0 0 0 3.4731 -1.3491 0.0000 C 0 0 0 0 0 0 0 0 0 0 0 0 2.3020 -2.0035 0.0000 C 0 0 0 0 0 0 0 0 0 0 0 0 1.1539 -0.0115 0.0000 C 0 0 0 0 0 0 0 0 0 0 0 0 3.4731 -2.6…	cyclobutyrol	C10 H18 O3	186.126	65051	45
	FALSE	# ACD/Labs04111411492D 13 12 0 0 0 0 0 0 0 0 1 V2000 0.0000 -1.9921 0.0000 C 0 0 0 0 0 0 0 0 0 0 0 0 1.1515 -1.3242 0.0000 C 0 0 0 0 0 0 0 0 0 0 0 0 2.3030 -1.9921 0.0000 C 0 0 0 0 0 0 0 0 0 0 0 0 3.4545 -1.3242 0.0000 C 0 0 0 0 0 0 0 0 0 0 0 0 4.6060 -1.9921 0.0000 C 0 0 0 0 0 0 0 0 0 0 0 0 5.7575 -1.3242 0.0000 C 0 0 0 0 0 0 0 0 0 0 0 0 6.9090 -1.9921 0.0000 C 0 0 0 0 0 0 0 0 0 0 0 0 9.2119 -1.…	3-Oxodecanoic acid	C10 H18 O3	186.126	4446109	30
	FALSE	# ACD/Labs04221415492D 13 12 0 0 0 0 0 0 0 0 1 V2000 11.4908 0.0000 0.0000 O 0 0 0 0 0 0 0 0 0 0 0 0 12.6411 -1.9973 0.0000 O 0 0 0 0 0 0 0 0 0 0 0 0 0.0000 -1.3273 0.0000 O 0 0 0 0 0 0 0 0 0 0 0 0 11.5034 -1.3273 0.0000 C 0 0 0 0 0 0 0 0 0 0 0 0 10.3404 -1.9973 0.0000 C 0 0 0 0 0 0 0 0 0 0 0 0 9.2027 -1.3273 0.0000 C 0 0 0 0 0 0 0 0 0 0 0 0 8.0398 -1.9973 0.0000 C 0 0 0 0 0 0 0 0 0 0 0 0 6.9021 …	10-oxocapric acid	C10 H18 O3	186.126	71986	27
	FALSE	#5312741 -OEChem-02070710132D 31 30 0 0 0 0 0 0 0999 V2000 2.5369 -0.4400 0.0000 O 0 0 0 0 0 0 0 0 0 0 0 0 3.4030 1.0600 0.0000 O 0 0 0 0 0 0 0 0 0 0 0 0 12.0632 0.0600 0.0000 O 0 0 0 0 0 0 0 0 0 0 0 0 6.8671 0.0600 0.0000 C 0 0 0 0 0 0 0 0 0 0 0 0 6.0010 -0.4400 0.0000 C 0 0 0 0 0 0 0 0 0 0 0 0 7.7331 -0.4400 0.0000 C 0 0 0 0 0 0 0 0 0 0 0 0 5.1350 0.0600 0.0000 C 0 0 0 0 0 0 0 0 0 0 0 0 8.5991 …	(8E)-10-Hydroxy-8-decenoic acid	C10 H18 O3	186.126	4472166	18
	FALSE	# ACD/Labs04221415492D 13 12 0 0 0 0 0 0 0 0 1 V2000 2.3136 -3.3150 0.0000 O 0 0 0 0 0 0 0 0 0 0 0 0 1.1741 0.0000 0.0000 O 0 0 0 0 0 0 0 0 0 0 0 0 0.0000 -2.0028 0.0000 O 0 0 0 0 0 0 0 0 0 0 0 0 2.3021 -1.9913 0.0000 C 0 0 0 0 0 0 0 0 0 0 0 0 1.1511 -1.3237 0.0000 C 0 0 0 0 0 0 0 0 0 0 0 0 3.4532 -1.3237 0.0000 C 0 0 0 0 0 0 0 0 0 0 0 0 4.6042 -1.9913 0.0000 C 0 0 0 0 0 0 0 0 0 0 0 0 5.7553 -1.3…	2-Oxodecanoic acid	C10 H18 O3	186.126	228032	18
	FALSE	#6455146 -OEChem-02070710302D 31 31 0 1 0 0 0 0 0999 V2000 8.0622 -1.0000 0.0000 O 0 0 0 0 0 0 0 0 0 0 0 0 8.0622 1.0000 0.0000 O 0 0 0 0 0 0 0 0 0 0 0 0 9.7942 1.0000 0.0000 O 0 0 0 0 0 0 0 0 0 0 0 0 6.3301 -1.0000 0.0000 C 0 0 0 0 0 0 0 0 0 0 0 0 7.1962 -0.5000 0.0000 C 0 0 3 0 0 0 0 0 0 0 0 0 5.4641 -0.5000 0.0000 C 0 0 0 0 0 0 0 0 0 0 0 0 4.5981 -1.0000 0.0000 C 0 0 0 0 0 0 0 0 0 0 0 0 3.7321…	5-Hexyl-1,4-dioxan-2-one	C10 H18 O3	186.126	4957421	14
	FALSE	# ACD/Labs04300715522D 13 13 0 0 0 0 0 0 0 0 1 V2000 9.3039 -5.7591 0.0000 C 0 0 0 0 0 0 0 0 0 0 0 0 7.9735 -5.7591 0.0000 C 0 0 0 0 0 0 0 0 0 0 0 0 7.3129 -4.6055 0.0000 C 0 0 0 0 0 0 0 0 0 0 0 0 5.9824 -4.6055 0.0000 C 0 0 0 0 0 0 0 0 0 0 0 0 5.3126 -3.4611 0.0000 C 0 0 0 0 0 0 0 0 0 0 0 0 3.9914 -3.4611 0.0000 C 0 0 0 0 0 0 0 0 0 0 0 0 3.3215 -2.3074 0.0000 C 0 0 0 0 0 0 0 0 0 0 0 0 3.9914 -1.…	253TJ775PU	C10 H18 O3	186.126	14517734	10
	FALSE	#551273 -OEChem-02070708262D 31 30 0 1 0 0 0 0 0999 V2000 6.0010 -0.2500 0.0000 O 0 0 0 0 0 0 0 0 0 0 0 0 2.5369 -0.2500 0.0000 O 0 0 0 0 0 0 0 0 0 0 0 0 5.1350 1.2500 0.0000 O 0 0 0 0 0 0 0 0 0 0 0 0 8.5991 0.2500 0.0000 C 0 0 0 0 0 0 0 0 0 0 0 0 7.7331 -0.2500 0.0000 C 0 0 0 0 0 0 0 0 0 0 0 0 6.8671 0.2500 0.0000 C 0 0 0 0 0 0 0 0 0 0 0 0 8.5991 1.2500 0.0000 C 0 0 0 0 0 0 0 0 0 0 0 0 9.4651 -0…	Isopentyl 2-(1-hydroxyethyl)acrylate	C10 H18 O3	186.126	479563	10
	FALSE	# ACD/Labs08121512362D 13 12 0 0 0 0 0 0 0 0 1 V2000 0.0000 -1.3254 0.0000 C 0 0 0 0 0 0 0 0 0 0 0 0 2.3010 0.0000 0.0000 C 0 0 0 0 0 0 0 0 0 0 0 0 6.9030 0.0000 0.0000 C 0 0 0 0 0 0 0 0 0 0 0 0 9.2039 -1.3254 0.0000 C 0 0 0 0 0 0 0 0 0 0 0 0 1.1505 -1.9973 0.0000 C 0 0 0 0 0 0 0 0 0 0 0 0 3.4515 -1.9973 0.0000 C 0 0 0 0 0 0 0 0 0 0 0 0 2.3010 -1.3254 0.0000 C 0 0 0 0 0 0 0 0 0 0 0 0 6.9030 -1.32…	2-Methylbutyl 3-hydroxy-2-methylenebutanoate	C10 H18 O3	186.126	35014919	7
	FALSE	#188642 -OEChem-02070708192D 31 32 0 1 0 0 0 0 0999 V2000 5.5246 1.7559 0.0000 O 0 0 0 0 0 0 0 0 0 0 0 0 5.3776 -1.5246 0.0000 O 0 0 0 0 0 0 0 0 0 0 0 0 2.4384 -0.4338 0.0000 O 0 0 0 0 0 0 0 0 0 0 0 0 5.6364 -0.5587 0.0000 C 0 0 3 0 0 0 0 0 0 0 0 0 5.8952 0.4073 0.0000 C 0 0 3 0 0 0 0 0 0 0 0 0 4.6586 1.2559 0.0000 C 0 0 0 0 0 0 0 0 0 0 0 0 3.9043 -1.5587 0.0000 C 0 0 0 0 0 0 0 0 0 0 0 0 3.4043 -…	1,3,3-Trimethyl-2-oxabicyclo[2.2.2]octane-4,6-diol	C10 H18 O3	186.126	163936	6
	FALSE	# ACD/Labs08121512272D 13 12 0 0 0 0 0 0 0 0 1 V2000 0.0000 0.0000 0.0000 C 0 0 0 0 0 0 0 0 0 0 0 0 10.3702 -2.0014 0.0000 C 0 0 0 0 0 0 0 0 0 0 0 0 1.1511 -0.6637 0.0000 C 0 0 0 0 0 0 0 0 0 0 0 0 1.1511 -2.0014 0.0000 C 0 0 0 0 0 0 0 0 0 0 0 0 2.3022 -2.6651 0.0000 C 0 0 0 0 0 0 0 0 0 0 0 0 3.4533 -2.0014 0.0000 C 0 0 0 0 0 0 0 0 0 0 0 0 5.7658 -2.0014 0.0000 C 0 0 0 0 0 0 0 0 0 0 0 0 6.9169 -2.…	(5Z)-3-Hydroxy-5-octen-1-yl acetate	C10 H18 O3	186.126	35013186	4
	FALSE	# ACD/Labs08121512272D 13 12 0 0 0 0 0 0 0 0 1 V2000 10.3499 -3.9847 0.0000 C 0 0 0 0 0 0 0 0 0 0 0 0 0.0000 -1.9975 0.0000 C 0 0 0 0 0 0 0 0 0 0 0 0 9.2011 -3.3223 0.0000 C 0 0 0 0 0 0 0 0 0 0 0 0 1.1488 -1.3248 0.0000 C 0 0 0 0 0 0 0 0 0 0 0 0 9.2011 -1.9975 0.0000 C 0 0 0 0 0 0 0 0 0 0 0 0 8.0522 -1.3248 0.0000 C 0 0 0 0 0 0 0 0 0 0 0 0 6.9034 -1.9975 0.0000 C 0 0 0 0 0 0 0 0 0 0 0 0 4.5954 -1…	Ethyl (5Z)-3-hydroxy-5-octenoate	C10 H18 O3	186.126	35013185	4
	FALSE	# ACD/Labs04221415492D 13 12 0 0 1 0 0 0 0 0 1 V2000 3.4114 -0.6436 0.0000 O 0 0 0 0 0 0 0 0 0 0 0 0 3.6521 -2.0353 0.0000 O 0 0 0 0 0 0 0 0 0 0 0 0 2.2656 -0.0052 0.0000 O 0 0 0 0 0 0 0 0 0 0 0 0 1.1459 -3.2545 0.0000 C 0 0 0 0 0 0 0 0 0 0 0 0 1.1459 -4.5677 0.0000 C 0 0 0 0 0 0 0 0 0 0 0 0 2.2813 -2.6161 0.0000 C 0 0 0 0 0 0 0 0 0 0 0 0 0.0052 -2.6161 0.0000 C 0 0 0 0 0 0 0 0 0 0 0 0 2.2813 -1.…	(3S)-6-Hydroxy-3-isopropenyl-heptanoate	C10 H18 O3	186.126	391458	4
	FALSE	# ACD/Labs04221415492D 13 12 0 0 1 0 0 0 0 0 1 V2000 3.7202 -0.6475 0.0000 O 0 0 0 0 0 0 0 0 0 0 0 0 3.3729 -2.4841 0.0000 O 0 0 0 0 0 0 0 0 0 0 0 0 3.3965 -3.9145 0.0000 O 0 0 0 0 0 0 0 0 0 0 0 0 1.1361 -3.9145 0.0000 C 0 0 0 0 0 0 0 0 0 0 0 0 1.1361 -1.3068 0.0000 C 0 0 0 0 0 0 0 0 0 0 0 0 0.0000 -3.2611 0.0000 C 0 0 0 0 0 0 0 0 0 0 0 0 0.0000 -1.9543 0.0000 C 0 0 0 0 0 0 0 0 0 0 0 0 2.5900 -1.…	(5S)-6-Hydroxy-5-isopropenyl-2-methylhexanoate	C10 H18 O3	186.126	391463	4
	FALSE	# ACD/Labs04221415492D 13 12 0 0 1 0 0 0 0 0 1 V2000 3.7226 -0.6528 0.0000 O 0 0 0 0 0 0 0 0 0 0 0 0 3.3816 -2.4876 0.0000 O 0 0 0 0 0 0 0 0 0 0 0 0 3.4051 -3.9226 0.0000 O 0 0 0 0 0 0 0 0 0 0 0 0 1.1350 -3.9226 0.0000 C 0 0 0 0 0 0 0 0 0 0 0 0 1.1350 -1.3056 0.0000 C 0 0 0 0 0 0 0 0 0 0 0 0 0.0000 -3.2639 0.0000 C 0 0 0 0 0 0 0 0 0 0 0 0 0.0000 -1.9584 0.0000 C 0 0 0 0 0 0 0 0 0 0 0 0 2.5935 -1.…	(5R)-6-Hydroxy-5-isopropenyl-2-methylhexanoate	C10 H18 O3	186.126	391447	4
	FALSE	# ACD/Labs08121512342D 13 12 0 0 0 0 0 0 0 0 1 V2000 0.0000 -3.9933 0.0000 C 0 0 0 0 0 0 0 0 0 0 0 0 5.7600 -2.0007 0.0000 C 0 0 0 0 0 0 0 0 0 0 0 0 2.3072 -3.9933 0.0000 C 0 0 0 0 0 0 0 0 0 0 0 0 3.4608 -3.3318 0.0000 C 0 0 0 0 0 0 0 0 0 0 0 0 1.1536 -2.0007 0.0000 C 0 0 0 0 0 0 0 0 0 0 0 0 2.3072 -1.3311 0.0000 C 0 0 0 0 0 0 0 0 0 0 0 0 6.9136 -3.9933 0.0000 C 0 0 0 0 0 0 0 0 0 0 0 0 1.1536 -3.…	(6Z)-6-Methyl-2-methylene-6-octene-1,3,8-triol	C10 H18 O3	186.126	35014639	4
	FALSE	# ACD/Labs04221415492D 13 12 0 0 1 0 0 0 0 0 1 V2000 3.4083 -0.6387 0.0000 O 0 0 0 0 0 0 0 0 0 0 0 0 3.6491 -2.0366 0.0000 O 0 0 0 0 0 0 0 0 0 0 0 0 2.2565 0.0000 0.0000 O 0 0 0 0 0 0 0 0 0 0 0 0 1.1413 -3.2565 0.0000 C 0 0 0 0 0 0 0 0 0 0 0 0 1.1466 -4.5653 0.0000 C 0 0 0 0 0 0 0 0 0 0 0 0 2.2722 -2.6125 0.0000 C 0 0 0 0 0 0 0 0 0 0 0 0 0.0000 -2.6125 0.0000 C 0 0 0 0 0 0 0 0 0 0 0 0 2.2722 -1.3…	(3R)-6-Hydroxy-3-isopropenyl-heptanoate	C10 H18 O3	186.126	391443	4
	FALSE	# ACD/Labs08121512282D 13 14 0 0 0 0 0 0 0 0 1 V2000 2.6153 0.0000 0.0000 C 0 0 0 0 0 0 0 0 0 0 0 0 1.3600 -0.7323 0.0000 C 0 0 0 0 0 0 0 0 0 0 0 0 1.3600 -2.1969 0.0000 C 0 0 0 0 0 0 0 0 0 0 0 0 0.0000 -3.0338 0.0000 O 0 0 0 0 0 0 0 0 0 0 0 0 2.6153 -4.4983 0.0000 C 0 0 0 0 0 0 0 0 0 0 0 0 2.6153 -3.0338 0.0000 C 0 0 0 0 0 0 0 0 0 0 0 0 3.9753 -2.1969 0.0000 C 0 0 0 0 0 0 0 0 0 0 0 0 3.9753 -0.7…	1,3,3-Trimethyl-2-oxabicyclo[2.2.2]octane-5,7-diol	C10 H18 O3	186.126	35013524	1
	FALSE	# ACD/Labs08121512362D 13 13 0 0 0 0 0 0 0 0 1 V2000 1.1518 -5.6738 0.0000 C 0 0 0 0 0 0 0 0 0 0 0 0 3.4554 -5.6738 0.0000 C 0 0 0 0 0 0 0 0 0 0 0 0 1.4468 0.0000 0.0000 C 0 0 0 0 0 0 0 0 0 0 0 0 1.1518 -3.0128 0.0000 C 0 0 0 0 0 0 0 0 0 0 0 0 3.4554 -1.6851 0.0000 C 0 0 0 0 0 0 0 0 0 0 0 0 2.3036 -5.0100 0.0000 C 0 0 0 0 0 0 0 0 0 0 0 0 2.3036 -3.6766 0.0000 C 0 0 0 0 0 0 0 0 0 0 0 0 3.4554 -3.0…	5-Isopropyl-2-methyl-5-cyclohexene-1,2,4-triol	C10 H18 O3	186.126	35014706	1
FALSE	Guvacine	C6 H9 N O2	Full match	Full match		127.063	1.492	6.25147e+08	9	No MS2	17268.4	19527.1	20356.2	1.39611e+08	1.25211e+08	3.46926e+08	1.13207e+06	2.43412e+08	1.67e+06	2.20096e+06	5.16091e+06	3.86641e+06	1.47011e+08	2.85496e+06	984084	9.60634e+07	9.50221e+07	5.53165e+06	1.10737e+07	3.90662e+07	2.38926e+06	1.98396e+07	4.27353e+08	6.21262e+06	1.12757e+06	1.35097e+08	1.03148e+08	1.19323e+08	1.42979e+07	9.22932e+06	1.89975e+06	1.47018e+06	3.17348e+07	1.23468e+08	6.16568e+06	1.77392e+06	1.20301e+08	1.12805e+08	2.32594e+06
	Checked	Structure	Name	Formula	Molecular Weight	CSID	# References
	FALSE	# ACD/Labs04281713042D 9 9 0 0 0 0 0 0 0 0 1 V2000 3.4425 0.0000 0.0000 O 0 0 0 0 0 0 0 0 0 0 0 0 4.6022 -1.9928 0.0000 O 0 0 0 0 0 0 0 0 0 0 0 0 1.1552 -3.9947 0.0000 N 0 0 0 0 0 0 0 0 0 0 0 0 2.3057 -2.0020 0.0000 C 0 0 0 0 0 0 0 0 0 0 0 0 3.4517 -1.3346 0.0000 C 0 0 0 0 0 0 0 0 0 0 0 0 2.3057 -3.3320 0.0000 C 0 0 0 0 0 0 0 0 0 0 0 0 1.1552 -1.3346 0.0000 C 0 0 0 0 0 0 0 0 0 0 0 0 0.0000 -2.002…	Guvacine	C6 H9 N O2	127.063	3412	141
	FALSE	# ACD/Labs04281713042D 9 9 0 0 0 0 0 0 0 0 1 V2000 0.0047 -4.6597 0.0000 O 0 0 0 0 0 0 0 0 0 0 0 0 2.3112 -4.6551 0.0000 O 0 0 0 0 0 0 0 0 0 0 0 0 1.1556 0.0000 0.0000 N 0 0 0 0 0 0 0 0 0 0 0 0 1.1556 -2.6607 0.0000 C 0 0 0 0 0 0 0 0 0 0 0 0 1.1556 -3.9934 0.0000 C 0 0 0 0 0 0 0 0 0 0 0 0 0.0000 -1.9944 0.0000 C 0 0 0 0 0 0 0 0 0 0 0 0 2.3019 -1.9944 0.0000 C 0 0 0 0 0 0 0 0 0 0 0 0 0.0000 -0.666…	Isoguvacine	C6 H9 N O2	127.063	3633	91
	FALSE	# ACD/Labs04221415492D 9 9 0 0 0 0 0 0 0 0 1 V2000 3.4577 0.0000 0.0000 O 0 0 0 0 0 0 0 0 0 0 0 0 4.5858 -1.9948 0.0000 O 0 0 0 0 0 0 0 0 0 0 0 0 1.1281 -1.3299 0.0000 N 0 0 0 0 0 0 0 0 0 0 0 0 2.3250 -1.9948 0.0000 C 0 0 0 0 0 0 0 0 0 0 0 0 3.4577 -1.3299 0.0000 C 0 0 0 0 0 0 0 0 0 0 0 0 2.3250 -3.3247 0.0000 C 0 0 0 0 0 0 0 0 0 0 0 0 0.0000 -1.9948 0.0000 C 0 0 0 0 0 0 0 0 0 0 0 0 1.1281 -3.989…	D-1-Piperideine-2-carboxylic acid	C6 H9 N O2	127.063	1157	49
	FALSE	# ACD/Labs04111411492D 9 9 0 0 0 0 0 0 0 0 1 V2000 1.1518 -2.6584 0.0000 N 0 0 0 0 0 0 0 0 0 0 0 0 2.3037 -1.9950 0.0000 C 0 0 0 0 0 0 0 0 0 0 0 0 2.3037 -0.6635 0.0000 C 0 0 0 0 0 0 0 0 0 0 0 0 1.1518 0.0000 0.0000 C 0 0 0 0 0 0 0 0 0 0 0 0 0.0000 -0.6635 0.0000 C 0 0 0 0 0 0 0 0 0 0 0 0 0.0000 -1.9950 0.0000 C 0 0 0 0 0 0 0 0 0 0 0 0 3.4555 -3.9899 0.0000 O 0 0 0 0 0 0 0 0 0 0 0 0 3.4555 -2.658…	1-piperideine-6-carboxylic acid	C6 H9 N O2	127.063	144715	45
	FALSE	# ACD/Labs06251410132D 10 10 0 0 1 0 0 0 0 0 1 V2000 3.1470 -4.2992 0.0000 O 0 0 0 0 0 0 0 0 0 0 0 0 3.1470 -2.9708 0.0000 C 0 0 0 0 0 0 0 0 0 0 0 0 4.2992 -2.3044 0.0000 O 0 0 0 0 0 0 0 0 0 0 0 0 1.9948 -2.3044 0.0000 C 0 0 0 0 0 0 0 0 0 0 0 0 1.9948 -3.6329 0.0000 H 0 0 0 0 0 0 0 0 0 0 0 0 2.6612 -1.1522 0.0000 C 0 0 0 0 0 0 0 0 0 0 0 0 1.9948 0.0000 0.0000 C 0 0 0 0 0 0 0 0 0 0 0 0 0.6664 0.00…	(S)-4,5-dehydropipecolic acid	C6 H9 N O2	127.063	390175	39
	FALSE	#558375 -OEChem-02070708272D 18 18 0 1 0 0 0 0 0999 V2000 5.5910 0.1237 0.0000 O 0 0 0 0 0 0 0 0 0 0 0 0 5.0558 -1.5236 0.0000 O 0 0 0 0 0 0 0 0 0 0 0 0 3.0878 -0.8242 0.0000 N 0 0 0 0 0 0 0 0 0 0 0 0 3.8968 -0.2365 0.0000 C 0 0 3 0 0 0 0 0 0 0 0 0 3.5878 0.7146 0.0000 C 0 0 0 0 0 0 0 0 0 0 0 0 2.2788 -0.2365 0.0000 C 0 0 0 0 0 0 0 0 0 0 0 0 2.5878 0.7146 0.0000 C 0 0 0 0 0 0 0 0 0 0 0 0 4.8479 -…	4-Methyleneproline	C6 H9 N O2	127.063	485385	20
	FALSE	# ACD/Labs04221415492D 9 9 0 0 0 0 0 0 0 0 1 V2000 4.7855 0.0000 0.0000 O 0 0 0 0 0 0 0 0 0 0 0 0 5.9373 -1.9949 0.0000 O 0 0 0 0 0 0 0 0 0 0 0 0 3.6337 -3.3249 0.0000 N 0 0 0 0 0 0 0 0 0 0 0 0 2.4818 -1.3300 0.0000 C 0 0 0 0 0 0 0 0 0 0 0 0 3.6337 -1.9949 0.0000 C 0 0 0 0 0 0 0 0 0 0 0 0 1.1518 -1.3300 0.0000 C 0 0 0 0 0 0 0 0 0 0 0 0 1.8168 -0.1781 0.0000 C 0 0 0 0 0 0 0 0 0 0 0 0 4.7855 -1.330…	alpha-(Methylenecyclopropyl)glycine	C6 H9 N O2	127.063	3677223	18
	FALSE	# ACD/Labs04221415492D 9 9 0 0 1 0 0 0 0 0 1 V2000 3.4610 0.0000 0.0000 O 0 0 0 0 0 0 0 0 0 0 0 0 4.6209 -1.9269 0.0000 O 0 0 0 0 0 0 0 0 0 0 0 0 1.1506 -1.2661 0.0000 N 0 0 0 0 0 0 0 0 0 0 0 0 2.3151 -1.9315 0.0000 C 0 0 0 0 0 0 0 0 0 0 0 0 3.4656 -1.2661 0.0000 C 0 0 0 0 0 0 0 0 0 0 0 0 2.3151 -3.2762 0.0000 C 0 0 0 0 0 0 0 0 0 0 0 0 0.0000 -1.9315 0.0000 C 0 0 0 0 0 0 0 0 0 0 0 0 1.1506 -3.955…	(2S)-2,3,4,5-Tetrahydro-2-pyridinecarboxylic acid	C6 H9 N O2	127.063	21865623	11
	FALSE	#441452 -OEChem-02070708252D 18 18 0 1 0 0 0 0 0999 V2000 5.8660 0.7015 0.0000 O 0 0 0 0 0 0 0 0 0 0 0 0 4.3660 1.5675 0.0000 O 0 0 0 0 0 0 0 0 0 0 0 0 4.8660 -1.0306 0.0000 N 0 0 0 0 0 0 0 0 0 0 0 0 3.3660 -0.1645 0.0000 C 0 0 1 0 0 0 0 0 0 0 0 0 2.5000 0.3355 0.0000 C 0 0 0 0 0 0 0 0 0 0 0 0 2.5000 -0.6645 0.0000 C 0 0 0 0 0 0 0 0 0 0 0 0 4.3660 -0.1645 0.0000 C 0 0 1 0 0 0 0 0 0 0 0 0 2.0000 -…	(2S)-Amino[(1S)-2-methylenecyclopropyl]acetic acid	C6 H9 N O2	127.063	390185	10
FALSE			No results	No results		121.917	0.909	6.20832e+08	0	No MS2	21147.4	22589.9	24398	7.99764e+06	7.80619e+06	2.92517e+06	2.69715e+06	2.94607e+06	2.61181e+06	3.64203e+06	1.102e+08	2.97981e+06	3.51479e+06	4.3599e+07	149911	7.62827e+06	6.37943e+06	3.6394e+06	8.19952e+06	4.44072e+06	3.77023e+06	8.05186e+07	1.43726e+07	4.04587e+06	147155	8.78094e+06	8.76422e+06	2.95911e+06	6.07134e+07	6.20832e+08	4.30363e+06	2.26151e+06	2.90719e+06	2.91134e+06	7.35325e+06	162629	9.62647e+06	9.38397e+06	8.12939e+07
	Checked	Structure	Name	Formula	Molecular Weight	CSID	# References
FALSE	5-Methoxy-3-indoleaceate	C11 H11 N O3	Full match	Full match		205.073	10.398	6.17797e+08	8	No MS2	317380	24571	363534	6.29444e+07	6.52963e+07	3.22075e+07	1.91816e+06	4.86503e+07	502628	2.17439e+06	3.75373e+06	1.00909e+06	2.32827e+07	1.43456e+07	311942	5.44729e+07	4.98077e+07	691995	896954	1.16104e+07	1.27032e+06	4.57884e+06	2.39927e+08	1.32074e+06	332144	5.73594e+07	5.73504e+07	2.58959e+07	5.03468e+06	1.1227e+06	607155	649974	4.8377e+06	4.12711e+07	1.65689e+07	327966	6.52223e+07	6.02368e+07	3.81649e+06
	Checked	Structure	Name	Formula	Molecular Weight	CSID	# References
	FALSE	# ACD/Labs06251410122D 15 16 0 0 0 0 0 0 0 0 1 V2000 5.8014 0.0000 0.0000 O 0 0 0 0 0 0 0 0 0 0 0 0 5.3956 -1.2641 0.0000 C 0 0 0 0 0 0 0 0 0 0 0 0 4.0916 -1.5368 0.0000 O 0 0 0 0 0 0 0 0 0 0 0 0 6.2805 -2.2487 0.0000 C 0 0 0 0 0 0 0 0 0 0 0 0 5.8746 -3.5128 0.0000 C 0 0 0 0 0 0 0 0 0 0 0 0 6.6530 -4.5906 0.0000 C 0 0 0 0 0 0 0 0 0 0 0 0 5.8746 -5.6684 0.0000 N 0 0 0 0 0 0 0 0 0 0 0 0 4.6039 -5.2…	5-Methoxy-3-indoleaceate	C11 H11 N O3	205.074	17924	277
	FALSE	# ACD/Labs06251410132D 15 16 0 0 0 0 0 0 0 0 1 V2000 4.8041 -0.7120 0.0000 O 0 0 0 0 0 0 0 0 0 0 0 0 3.4977 -0.9885 0.0000 C 0 0 0 0 0 0 0 0 0 0 0 0 2.6129 0.0000 0.0000 O 0 0 0 0 0 0 0 0 0 0 0 0 3.0898 -2.2534 0.0000 C 0 0 0 0 0 0 0 0 0 0 0 0 3.9815 -3.2419 0.0000 C 0 0 0 0 0 0 0 0 0 0 0 0 3.5668 -4.5069 0.0000 C 0 0 0 0 0 0 0 0 0 0 0 0 4.3479 -5.5852 0.0000 C 0 0 0 0 0 0 0 0 0 0 0 0 3.5668 -6.6…	dl-3-Indolelactic acid	C11 H11 N O3	205.074	83867	157
	FALSE	# ACD/Labs04111411492D 15 15 0 0 0 0 0 0 0 0 1 V2000 2.2986 -1.9983 0.0000 C 0 0 0 0 0 0 0 0 0 0 0 0 2.2986 -3.3236 0.0000 C 0 0 0 0 0 0 0 0 0 0 0 0 1.1493 -1.3253 0.0000 C 0 0 0 0 0 0 0 0 0 0 0 0 1.1493 -3.9863 0.0000 C 0 0 0 0 0 0 0 0 0 0 0 0 0.0000 -1.9983 0.0000 C 0 0 0 0 0 0 0 0 0 0 0 0 0.0000 -3.3236 0.0000 C 0 0 0 0 0 0 0 0 0 0 0 0 3.4479 -1.3253 0.0000 C 0 0 0 0 0 0 0 0 0 0 0 0 4.5971 -1.…	Cinnamoyl glycine	C11 H11 N O3	205.074	618829	82
	FALSE	#826073 -OEChem-02070708342D 26 27 0 0 0 0 0 0 0999 V2000 3.7321 2.0223 0.0000 O 0 0 0 0 0 0 0 0 0 0 0 0 5.4805 -2.0123 0.0000 O 0 0 0 0 0 0 0 0 0 0 0 0 2.0000 -0.9777 0.0000 O 0 0 0 0 0 0 0 0 0 0 0 0 3.7321 -0.9777 0.0000 N 0 0 0 0 0 0 0 0 0 0 0 0 4.5981 0.5223 0.0000 C 0 0 0 0 0 0 0 0 0 0 0 0 4.5981 -0.4777 0.0000 C 0 0 0 0 0 0 0 0 0 0 0 0 3.7321 1.0223 0.0000 C 0 0 0 0 0 0 0 0 0 0 0 0 5.4920 -…	4,8-Dimethoxy-2(1H)-quinolinone	C11 H11 N O3	205.074	721521	26
	FALSE	#10465540 -OEChem-02070712122D 26 27 0 0 0 0 0 0 0999 V2000 4.9889 -2.2305 0.0000 O 0 0 0 0 0 0 0 0 0 0 0 0 5.9674 1.4862 0.0000 O 0 0 0 0 0 0 0 0 0 0 0 0 4.3211 2.0243 0.0000 O 0 0 0 0 0 0 0 0 0 0 0 0 4.6783 -1.2800 0.0000 N 0 0 0 0 0 0 0 0 0 0 0 0 3.7321 0.0247 0.0000 C 0 0 0 0 0 0 0 0 0 0 0 0 3.7321 -0.9753 0.0000 C 0 0 0 0 0 0 0 0 0 0 0 0 4.6783 0.3295 0.0000 C 0 0 0 0 0 0 0 0 0 0 0 0 5.2619 …	Methyl 1-methoxy-1H-indole-3-carboxylate	C11 H11 N O3	205.074	8640951	12
	FALSE	# ACD/Labs02211713302D 15 16 0 0 0 0 0 0 0 0 1 V2000 6.9140 -3.9894 0.0000 C 0 0 0 0 0 0 0 0 0 0 0 0 5.7593 -3.3256 0.0000 C 0 0 0 0 0 0 0 0 0 0 0 0 4.6116 -3.9825 0.0000 C 0 0 0 0 0 0 0 0 0 0 0 0 3.4639 -3.3187 0.0000 C 0 0 0 0 0 0 0 0 0 0 0 0 2.3093 -3.9825 0.0000 C 0 0 0 0 0 0 0 0 0 0 0 0 2.3093 -5.3099 0.0000 C 0 0 0 0 0 0 0 0 0 0 0 0 3.4639 -5.9737 0.0000 N 0 0 0 0 0 0 0 0 0 0 0 0 4.6116 -5.…	Gentianamine	C11 H11 N O3	205.074	390958	12
	FALSE	# ACD/Labs04221415492D 15 16 0 0 0 0 0 0 0 0 1 V2000 3.4520 -0.6697 0.0000 O 0 0 0 0 0 0 0 0 0 0 0 0 5.7511 -2.0091 0.0000 O 0 0 0 0 0 0 0 0 0 0 0 0 5.7442 -4.6672 0.0000 O 0 0 0 0 0 0 0 0 0 0 0 0 3.4520 -4.6672 0.0000 N 0 0 0 0 0 0 0 0 0 0 0 0 2.3060 -2.6650 0.0000 C 0 0 0 0 0 0 0 0 0 0 0 0 3.4659 -2.0022 0.0000 C 0 0 0 0 0 0 0 0 0 0 0 0 4.6119 -2.6788 0.0000 C 0 0 0 0 0 0 0 0 0 0 0 0 2.2991 -3.…	Swietenidin B	C11 H11 N O3	205.074	391236	10
	FALSE	# ACD/Labs03161217452D 15 16 0 0 0 0 0 0 0 0 1 V2000 3.4263 -3.7969 0.0000 C 0 0 0 0 0 0 0 0 0 0 0 0 2.6431 -4.8807 0.0000 C 0 0 0 0 0 0 0 0 0 0 0 0 3.4263 -5.9575 0.0000 N 0 0 0 0 0 0 0 0 0 0 0 0 4.6919 -4.2164 0.0000 C 0 0 0 0 0 0 0 0 0 0 0 0 2.9997 -2.5313 0.0000 C 0 0 0 0 0 0 0 0 0 0 0 0 1.7131 -2.2586 0.0000 C 0 0 0 0 0 0 0 0 0 0 0 0 1.3006 -0.9999 0.0000 C 0 0 0 0 0 0 0 0 0 0 0 0 4.6919 -5.…	3-Indolehydracrylic acid	C11 H11 N O3	205.074	26958790	8
FALSE	VS1150000	C18 H34 O4	Full match	Full match		314.246	12.077	6.16025e+08	7	No MS2	107335	21358.2	114024	1.969e+07	2.14449e+07	1.15646e+06	2.71394e+08	481846	3.19816e+07	5.37806e+08	4.12424e+06	583075	5.08255e+06	3.74053e+06	323905	8.77959e+06	1.11013e+07	1.12167e+08	3.55418e+06	3.66533e+06	4.10081e+06	2.14837e+06	5.08008e+06	895640	360090	1.95248e+07	9.48592e+06	797273	2.78941e+06	866700	4.38957e+06	5.20322e+07	3.37353e+08	4.73711e+06	3.39584e+06	351251	1.16345e+07	1.34476e+07	4.74638e+06
	Checked	Structure	Name	Formula	Molecular Weight	CSID	# References
	FALSE	# ACD/Labs04281710562D 22 21 0 0 0 0 0 0 0 0 1 V2000 3.9927 -8.0819 0.0000 O 0 0 0 0 0 0 0 0 0 0 0 0 15.2959 -2.3146 0.0000 O 0 0 0 0 0 0 0 0 0 0 0 0 5.9795 -9.2200 0.0000 O 0 0 0 0 0 0 0 0 0 0 0 0 13.3092 -1.1573 0.0000 O 0 0 0 0 0 0 0 0 0 0 0 0 5.3237 -8.0819 0.0000 C 0 0 0 0 0 0 0 0 0 0 0 0 13.9650 -2.3146 0.0000 C 0 0 0 0 0 0 0 0 0 0 0 0 5.9795 -6.9246 0.0000 C 0 0 0 0 0 0 0 0 0 0 0 0 13.3092…	VS1150000	C18 H34 O4	314.246	13837584	178
	FALSE	# ACD/Labs04281712472D 22 21 0 0 0 0 0 0 0 0 1 V2000 0.0000 -20.7766 0.0000 O 0 0 0 0 0 0 0 0 0 0 0 0 1.3383 -20.7766 0.0000 C 0 0 0 0 0 0 0 0 0 0 0 0 1.9965 -21.9394 0.0000 O 0 0 0 0 0 0 0 0 0 0 0 0 1.9965 -19.6358 0.0000 C 0 0 0 0 0 0 0 0 0 0 0 0 1.3383 -18.4730 0.0000 C 0 0 0 0 0 0 0 0 0 0 0 0 1.9965 -17.3102 0.0000 C 0 0 0 0 0 0 0 0 0 0 0 0 1.3383 -16.1693 0.0000 C 0 0 0 0 0 0 0 0 0 0 0 0 1.9…	Octadecanedioic acid	C18 H34 O4	314.246	63283	116
	FALSE	# ACD/Labs04221415492D 22 21 0 0 0 0 0 0 0 0 1 V2000 13.3340 -2.3288 0.0000 O 0 0 0 0 0 0 0 0 0 0 0 0 15.3124 -2.3288 0.0000 O 0 0 0 0 0 0 0 0 0 0 0 0 1.0923 -1.9372 0.0000 O 0 0 0 0 0 0 0 0 0 0 0 0 0.0000 0.0000 0.0000 O 0 0 0 0 0 0 0 0 0 0 0 0 13.6843 -0.7213 0.0000 C 0 0 0 0 0 0 0 0 0 0 0 0 14.9621 -0.7213 0.0000 C 0 0 0 0 0 0 0 0 0 0 0 0 12.5714 -0.0618 0.0000 C 0 0 0 0 0 0 0 0 0 0 0 0 16.075…	12,13-DiHOME	C18 H34 O4	314.246	8412123	28
	FALSE	# ACD/Labs04221415492D 22 22 0 0 0 0 0 0 0 0 1 V2000 10.8436 -0.1735 0.0000 O 0 0 0 0 0 0 0 0 0 0 0 0 1.1061 0.0000 0.0000 O 0 0 0 0 0 0 0 0 0 0 0 0 0.0000 -2.0169 0.0000 O 0 0 0 0 0 0 0 0 0 0 0 0 21.6873 -1.8868 0.0000 O 0 0 0 0 0 0 0 0 0 0 0 0 10.1930 -1.3012 0.0000 C 0 0 0 0 0 0 0 0 0 0 0 0 11.4943 -1.3012 0.0000 C 0 0 0 0 0 0 0 0 0 0 0 0 9.0219 -2.0169 0.0000 C 0 0 0 0 0 0 0 0 0 0 0 0 12.6220…	9,10-epoxy-18-hydroxyoctadecanoic acid	C18 H34 O4	314.246	7994062	24
	FALSE	#5282958 -OEChem-02070710102D 56 55 0 1 0 0 0 0 0999 V2000 9.7942 1.2500 0.0000 O 0 0 0 0 0 0 0 0 0 0 0 0 8.9282 -1.2500 0.0000 O 0 0 0 0 0 0 0 0 0 0 0 0 17.5885 -0.2500 0.0000 O 0 0 0 0 0 0 0 0 0 0 0 0 16.7224 1.2500 0.0000 O 0 0 0 0 0 0 0 0 0 0 0 0 10.6603 -0.2500 0.0000 C 0 0 0 0 0 0 0 0 0 0 0 0 11.5263 0.2500 0.0000 C 0 0 0 0 0 0 0 0 0 0 0 0 9.7942 0.2500 0.0000 C 0 0 3 0 0 0 0 0 0 0 0 0 12.3…	(12E)-9,10-Dihydroxy-12-octadecenoic acid	C18 H34 O4	314.246	4446085	23
	FALSE	# ACD/Labs04221415492D 22 21 0 0 0 0 0 0 0 0 1 V2000 9.6975 -2.3119 0.0000 O 0 0 0 0 0 0 0 0 0 0 0 0 11.6207 -2.3323 0.0000 O 0 0 0 0 0 0 0 0 0 0 0 0 1.0843 -1.9436 0.0000 O 0 0 0 0 0 0 0 0 0 0 0 0 0.0000 0.0000 0.0000 O 0 0 0 0 0 0 0 0 0 0 0 0 10.0453 -0.6547 0.0000 C 0 0 0 0 0 0 0 0 0 0 0 0 11.3138 -0.6547 0.0000 C 0 0 0 0 0 0 0 0 0 0 0 0 8.8792 0.0000 0.0000 C 0 0 0 0 0 0 0 0 0 0 0 0 12.4799 -…	9,10-DiHOME	C18 H34 O4	314.246	8142232	22
	FALSE	# ACD/Labs04221415492D 22 21 0 0 1 0 0 0 0 0 1 V2000 8.0397 0.0000 0.0000 O 0 0 0 0 0 0 0 0 0 0 0 0 9.2092 -3.3203 0.0000 O 0 0 0 0 0 0 0 0 0 0 0 0 1.1485 -0.0209 0.0000 O 0 0 0 0 0 0 0 0 0 0 0 0 0.0000 -2.0256 0.0000 O 0 0 0 0 0 0 0 0 0 0 0 0 8.0397 -1.3365 0.0000 C 0 0 0 0 0 0 0 0 0 0 0 0 9.1883 -1.9838 0.0000 C 0 0 0 0 0 0 0 0 0 0 0 0 6.8912 -2.0047 0.0000 C 0 0 0 0 0 0 0 0 0 0 0 0 10.3577 -1.…	(Z)-(7S,8S)-Dihydroxyoctadeca-9-enoate	C18 H34 O4	314.246	4444498	5
FALSE	MFCD00025555	C9 H18 N2 O3	Full match	Full match		202.131	6.123	6.07022e+08	5	No MS2	1.12529e+06	42119.7	246187	4.26153e+07	5.07322e+07	4.87983e+08	9.06109e+07	9.70978e+07	5.34418e+07	1.09986e+08	3.93537e+08	1.97352e+07	3.9532e+08	7.67943e+07	355959	4.67408e+07	4.36014e+07	3.64625e+08	4.38412e+08	3.85182e+08	2.67788e+08	2.06459e+08	1.21789e+06	1.23015e+08	410058	7.69396e+07	7.4822e+07	3.24925e+08	2.65444e+08	1.48228e+06	1.19966e+08	2.12166e+08	1.68759e+08	1.17465e+08	4.16858e+07	390538	9.6349e+07	9.18224e+07	6.07022e+08
	Checked	Structure	Name	Formula	Molecular Weight	CSID	# References
	FALSE	#259583 -OEChem-02070708202D 32 31 0 1 0 0 0 0 0999 V2000 2.5369 0.5000 0.0000 O 0 0 0 0 0 0 0 0 0 0 0 0 3.4030 2.0000 0.0000 O 0 0 0 0 0 0 0 0 0 0 0 0 6.0010 -0.5000 0.0000 O 0 0 0 0 0 0 0 0 0 0 0 0 5.1350 1.0000 0.0000 N 0 0 0 0 0 0 0 0 0 0 0 0 7.7331 0.5000 0.0000 N 0 0 0 0 0 0 0 0 0 0 0 0 4.2690 -0.5000 0.0000 C 0 0 0 0 0 0 0 0 0 0 0 0 3.4030 -1.0000 0.0000 C 0 0 0 0 0 0 0 0 0 0 0 0 4.2690 0.…	MFCD00025555	C9 H18 N2 O3	202.132	227831	86
	FALSE	#259321 -OEChem-02070708202D 32 31 0 1 0 0 0 0 0999 V2000 4.5981 2.0000 0.0000 O 0 0 0 0 0 0 0 0 0 0 0 0 8.0622 1.0000 0.0000 O 0 0 0 0 0 0 0 0 0 0 0 0 7.1962 -0.5000 0.0000 O 0 0 0 0 0 0 0 0 0 0 0 0 5.4641 0.5000 0.0000 N 0 0 0 0 0 0 0 0 0 0 0 0 2.8660 1.0000 0.0000 N 0 0 0 0 0 0 0 0 0 0 0 0 3.7321 -0.5000 0.0000 C 0 0 0 0 0 0 0 0 0 0 0 0 2.8660 -1.0000 0.0000 C 0 0 0 0 0 0 0 0 0 0 0 0 3.7321 0.…	Leucylalanine	C9 H18 N2 O3	202.132	227625	55
	FALSE	#417358 -OEChem-02070708262D 32 31 0 1 0 0 0 0 0999 V2000 3.7321 -1.1900 0.0000 O 0 0 0 0 0 0 0 0 0 0 0 0 5.4641 -1.1900 0.0000 O 0 0 0 0 0 0 0 0 0 0 0 0 6.3301 -0.6900 0.0000 O 0 0 0 0 0 0 0 0 0 0 0 0 5.4641 0.8100 0.0000 N 0 0 0 0 0 0 0 0 0 0 0 0 8.0622 0.3100 0.0000 N 0 0 0 0 0 0 0 0 0 0 0 0 3.7321 0.8100 0.0000 C 0 0 3 0 0 0 0 0 0 0 0 0 4.5981 0.3100 0.0000 C 0 0 3 0 0 0 0 0 0 0 0 0 2.8660 0.…	ala-ile	C9 H18 N2 O3	202.132	369449	18
	FALSE	#5246009 -OEChem-02070710102D 32 31 0 1 0 0 0 0 0999 V2000 4.2690 2.0000 0.0000 O 0 0 0 0 0 0 0 0 0 0 0 0 7.7331 1.0000 0.0000 O 0 5 0 0 0 0 0 0 0 0 0 0 6.8671 -0.5000 0.0000 O 0 0 0 0 0 0 0 0 0 0 0 0 2.5369 1.0000 0.0000 N 0 3 0 0 0 0 0 0 0 0 0 0 5.1350 0.5000 0.0000 N 0 0 0 0 0 0 0 0 0 0 0 0 3.4030 -0.5000 0.0000 C 0 0 3 0 0 0 0 0 0 0 0 0 3.4030 0.5000 0.0000 C 0 0 3 0 0 0 0 0 0 0 0 0 2.5369 -1…	ile-ala	C9 H18 N2 O3	202.132	4414311	8
	FALSE	# ACD/Labs08091916262D 14 13 0 0 0 0 0 0 0 0 1 V2000 3.4655 -1.3329 0.0000 C 0 0 0 0 0 0 0 0 0 0 0 0 2.3104 -1.9930 0.0000 N 0 0 0 0 0 0 0 0 0 0 0 0 1.1552 -1.3329 0.0000 C 0 0 0 0 0 0 0 0 0 0 0 0 0.0000 -1.9930 0.0000 C 0 0 0 0 0 0 0 0 0 0 0 0 1.1552 0.0000 0.0000 O 0 0 0 0 0 0 0 0 0 0 0 0 4.6207 -1.9930 0.0000 C 0 0 0 0 0 0 0 0 0 0 0 0 5.7759 -1.3329 0.0000 C 0 0 0 0 0 0 0 0 0 0 0 0 6.9184 -1.9…	4-[(3-Acetamidopropyl)amino]butanoic acid	C9 H18 N2 O3	202.132	74849628	1
FALSE	HO-dPEG8-OH	C16 H34 O9	Full match	Full match		370.219	9.056	6.03156e+08	1	No MS2	1.06719e+06	33383.1	34769.8	542861	513295	665963	3.55132e+08	358672	2.79511e+07	4.07768e+08	3.17438e+06	341838	476416	1.99022e+06	255381	354567	444729	5.23878e+07	737290	489393	766218	3.87217e+06	389838	429185	281129	537343	569018	735531	2.34849e+06	1.38409e+07	569144	3.47443e+07	3.54958e+08	486607	1.46119e+06	253760	524277	482512	3.6398e+06
	Checked	Structure	Name	Formula	Molecular Weight	CSID	# References
	FALSE	# ACD/Labs06251410132D 25 24 0 0 0 0 0 0 0 0 1 V2000 0.0000 -13.8094 0.0000 O 0 0 0 0 0 0 0 0 0 0 0 0 1.3403 -13.8094 0.0000 C 0 0 0 0 0 0 0 0 0 0 0 0 1.9865 -12.6606 0.0000 C 0 0 0 0 0 0 0 0 0 0 0 0 3.3267 -12.6606 0.0000 O 0 0 0 0 0 0 0 0 0 0 0 0 3.9968 -11.5118 0.0000 C 0 0 0 0 0 0 0 0 0 0 0 0 5.3132 -11.5118 0.0000 C 0 0 0 0 0 0 0 0 0 0 0 0 5.9833 -10.3631 0.0000 O 0 0 0 0 0 0 0 0 0 0 0 0 7.3…	HO-dPEG8-OH	C16 H34 O9	370.22	71135	189
FALSE	4687	C10 H12 N4 O5	Full match	Full match		268.08	3.364	6.01427e+08	9	No MS2	3.09518e+06	90319.1	330013	2.19278e+08	2.21895e+08	2.28777e+08	9.1736e+07	2.94334e+08	4.28191e+08	2.38526e+07	1.82826e+07	2.03112e+08	3.85347e+08	1.76757e+08	605865	1.93781e+08	1.63951e+08	1.98065e+08	1.29117e+08	8.91883e+07	3.39586e+08	7.15683e+07	3.00455e+07	3.69609e+08	653144	2.05445e+08	2.09857e+08	2.53122e+08	1.30656e+08	2.91067e+08	1.80234e+08	1.36507e+08	1.0577e+08	5.27146e+08	3.18057e+08	641471	2.01786e+08	1.8438e+08	1.01852e+08
	Checked	Structure	Name	Formula	Molecular Weight	CSID	# References
	FALSE	# ACD/Labs04281711072D 23 25 0 0 1 0 0 0 0 0 1 V2000 5.1211 -8.1330 0.0000 O 0 0 0 0 0 0 0 0 0 0 0 0 3.9145 -8.6672 0.0000 C 0 0 0 0 0 0 0 0 0 0 0 0 2.8369 -7.8843 0.0000 C 0 0 0 0 0 0 0 0 0 0 0 0 2.6987 -9.2106 0.0000 H 0 0 0 0 0 0 0 0 0 0 0 0 3.5000 -6.7330 0.0000 O 0 0 0 0 0 0 0 0 0 0 0 0 2.6066 -5.7474 0.0000 C 0 0 0 0 0 0 0 0 0 0 0 0 3.5000 -4.7619 0.0000 H 0 0 0 0 0 0 0 0 0 0 0 0 1.3908 -6.…	4687	C10 H12 N4 O5	268.081	5799	311
	FALSE	# ACD/Labs06251410132D 23 25 0 0 1 0 0 0 0 0 1 V2000 1.1499 0.0000 0.0000 O 0 0 0 0 0 0 0 0 0 0 0 0 1.1499 -1.3275 0.0000 C 0 0 0 0 0 0 0 0 0 0 0 0 0.0000 -1.9955 0.0000 N 0 0 0 0 0 0 0 0 0 0 0 0 0.0000 -3.3230 0.0000 C 0 0 0 0 0 0 0 0 0 0 0 0 1.1499 -3.9910 0.0000 N 0 0 0 0 0 0 0 0 0 0 0 0 2.3083 -3.3230 0.0000 C 0 0 0 0 0 0 0 0 0 0 0 0 2.3083 -1.9955 0.0000 C 0 0 0 0 0 0 0 0 0 0 0 0 3.5682 -1.5…	Arabinofuranosyl-hypoxanthine (ara-HX)	C10 H12 N4 O5	268.081	83269	47
	FALSE	# ACD/Labs04281710562D 23 25 0 0 1 0 0 0 0 0 1 V2000 1.1492 -8.4499 0.0000 O 0 0 0 0 0 0 0 0 0 0 0 0 1.1492 -7.1233 0.0000 C 0 0 0 0 0 0 0 0 0 0 0 0 2.3068 -6.4557 0.0000 C 0 0 0 0 0 0 0 0 0 0 0 0 2.3068 -5.1291 0.0000 C 0 0 0 0 0 0 0 0 0 0 0 0 3.5659 -4.7151 0.0000 N 0 0 0 0 0 0 0 0 0 0 0 0 3.9799 -3.4476 0.0000 C 0 0 0 0 0 0 0 0 0 0 0 0 2.9913 -4.3433 0.0000 H 0 0 0 0 0 0 0 0 0 0 0 0 5.2389 -3.…	Allopurinol riboside	C10 H12 N4 O5	268.081	18512601	30
	FALSE	# ACD/Labs04281711312D 19 20 0 0 0 0 0 0 0 0 2 V2000 3.3999 -3.1985 0.0000 O 0 0 0 0 0 0 0 0 0 0 0 0 6.8117 -1.1254 0.0000 O 0 0 0 0 0 0 0 0 0 0 0 0 0.0000 -3.9330 0.0000 O 0 5 0 0 0 0 0 0 0 0 0 0 1.1373 -1.9310 0.0000 O 0 0 0 0 0 0 0 0 0 0 0 0 11.8464 -1.0069 0.0000 O 0 0 0 0 0 0 0 0 0 0 0 0 7.8778 -3.2696 0.0000 N 0 0 0 0 0 0 0 0 0 0 0 0 9.2046 -1.5282 0.0000 N 0 0 0 0 0 0 0 0 0 0 0 0 6.7406 -3…	Nifurdazil	C10 H12 N4 O5	268.081	4882007	26
	FALSE	# ACD/Labs04221415492D 18 18 0 0 1 0 0 0 0 0 1 V2000 3.4632 -3.3099 0.0000 O 0 0 0 0 0 0 0 0 0 0 0 0 5.7721 -3.3179 0.0000 O 0 0 0 0 0 0 0 0 0 0 0 0 5.7721 -5.9739 0.0000 O 0 0 0 0 0 0 0 0 0 0 0 0 3.4713 -7.3059 0.0000 O 0 0 0 0 0 0 0 0 0 0 0 0 1.1625 -5.9820 0.0000 O 0 0 0 0 0 0 0 0 0 0 0 0 0.0000 -3.9718 0.0000 O 0 0 0 0 0 0 0 0 0 0 0 0 4.6338 0.0000 0.0000 O 0 0 0 0 0 0 0 0 0 0 0 0 3.4794 -1.9…	2-(alpha-D-mannosyl)-D-glyceric acid	C9 H16 O9	268.079	4573823	15
	FALSE	#3-Deoxy-D-glycero-D-galacto-2-nonulosonic acid.mol Marvin 08140716072D 18 17 0 0 0 0 0 0 0 0999 V2000 -2.0625 -0.7145 0.0000 C 0 0 0 0 0 0 0 0 0 0 0 0 -0.4125 0.7145 0.0000 C 0 0 2 0 0 0 0 0 0 0 0 0 -0.8250 1.4289 0.0000 O 0 0 0 0 0 0 0 0 0 0 0 0 0.4125 0.7145 0.0000 C 0 0 1 0 0 0 0 0 0 0 0 0 0.8250 1.4289 0.0000 O 0 0 0 0 0 0 0 0 0 0 0 0 0.8250 0.0000 0.0000 C 0 0 1 0 0 0 0 0 0 0 0 0 0.4125 -0.…	3-Deoxy-D-glycero-D-galacto-2-nonulosonic Acid	C9 H16 O9	268.079	17215951	13
	FALSE	#443262 -OEChem-02070708252D 34 34 0 1 0 0 0 0 0999 V2000 4.2690 0.2500 0.0000 O 0 0 0 0 0 0 0 0 0 0 0 0 6.0010 0.2500 0.0000 O 0 0 0 0 0 0 0 0 0 0 0 0 4.2690 -2.7500 0.0000 O 0 0 0 0 0 0 0 0 0 0 0 0 2.5369 -1.7500 0.0000 O 0 0 0 0 0 0 0 0 0 0 0 0 6.0010 -1.7500 0.0000 O 0 0 0 0 0 0 0 0 0 0 0 0 2.5369 1.2500 0.0000 O 0 0 0 0 0 0 0 0 0 0 0 0 5.1350 2.7500 0.0000 O 0 0 0 0 0 0 0 0 0 0 0 0 6.8671 2.…	FIROIN FROM RHODATHERMUS MARINUS*	C9 H16 O9	268.079	391517	7
	FALSE	# CDK 7/28/10,9:30 19 21 0 0 0 0 0 0 0 0999 V2000 6.6125 -2.6250 0.0000 N 0 0 0 0 0 0 0 0 0 0 0 0 6.3917 -4.9750 0.0000 C 0 0 0 0 0 0 0 0 0 0 0 0 5.9042 -2.3542 0.0000 C 0 0 0 0 0 0 0 0 0 0 0 0 5.9625 -1.5917 0.0000 C 0 0 0 0 0 0 0 0 0 0 0 0 6.6917 -1.4167 0.0000 N 0 0 0 0 0 0 0 0 0 0 0 0 6.1667 -5.6917 0.0000 C 0 0 0 0 0 0 0 0 0 0 0 0 7.0917 -2.0542 0.0000 C 0 0 0 0 0 0 0 0 0 0 0 0 5.7917 -4.537…	Arabinosylhypoxanthine	C10 H12 N4 O5	268.081	24654354	5
	FALSE	# ACD/Labs04221415492D 18 18 0 0 1 0 0 0 0 0 1 V2000 3.2959 -3.3592 0.0000 O 0 0 0 0 0 0 0 0 0 0 0 0 5.5960 -3.3592 0.0000 O 0 0 0 0 0 0 0 0 0 0 0 0 5.5960 -5.9912 0.0000 O 0 0 0 0 0 0 0 0 0 0 0 0 3.2959 -7.3111 0.0000 O 0 0 0 0 0 0 0 0 0 0 0 0 0.9880 -5.9912 0.0000 O 0 0 0 0 0 0 0 0 0 0 0 0 0.0000 -4.2128 0.0000 O 0 0 0 0 0 0 0 0 0 0 0 0 4.4104 0.0000 0.0000 O 0 0 0 0 0 0 0 0 0 0 0 0 3.2248 -2.0…	2-O-(alpha-D-glucopyranosyl)-D-glyceric acid	C9 H16 O9	268.079	26332738	4
FALSE	5-Hydroxydecanoic acid	C10 H20 O3	Full match	Full match		188.141	0.58	6.00199e+08	16	No MS2	79369.1	75671.2	462047	3.2305e+07	1.36276e+07	1.77326e+07	1.37472e+07	2.16475e+07	1.29658e+07	6.00199e+08	1.99135e+07	7.07642e+06	4.67806e+07	3.96445e+06	5.31772e+06	7.58557e+06	3.58789e+06	3.09486e+06	2.07648e+07	1.16588e+07	1.98994e+08	8.38986e+06	1.74285e+06	5.41497e+06	2.40094e+07	2.44005e+07	1.28723e+07	3.60265e+07	2.63066e+06	3.77668e+06	1.55998e+06	3.96809e+06	2.77298e+06	4.39268e+06	2.80769e+06	1.20731e+07	1.62886e+07	1.93254e+07	2.20167e+07
	Checked	Structure	Name	Formula	Molecular Weight	CSID	# References
	FALSE	#1825 -OEChem-02070708202D 33 32 0 1 0 0 0 0 0999 V2000 6.3301 -0.5950 0.0000 O 0 0 0 0 0 0 0 0 0 0 0 0 10.6603 0.9050 0.0000 O 0 0 0 0 0 0 0 0 0 0 0 0 9.7942 -0.5950 0.0000 O 0 0 0 0 0 0 0 0 0 0 0 0 6.3301 0.4050 0.0000 C 0 0 3 0 0 0 0 0 0 0 0 0 5.4641 0.9050 0.0000 C 0 0 0 0 0 0 0 0 0 0 0 0 4.5981 0.4050 0.0000 C 0 0 0 0 0 0 0 0 0 0 0 0 7.1962 0.9050 0.0000 C 0 0 0 0 0 0 0 0 0 0 0 0 3.7321 0.90…	5-Hydroxydecanoic acid	C10 H20 O3	188.141	1759	161
	FALSE	#26612 -OEChem-02070708192D 33 32 0 1 0 0 0 0 0999 V2000 8.0622 -0.5950 0.0000 O 0 0 0 0 0 0 0 0 0 0 0 0 10.6603 0.9050 0.0000 O 0 0 0 0 0 0 0 0 0 0 0 0 9.7942 -0.5950 0.0000 O 0 0 0 0 0 0 0 0 0 0 0 0 6.3301 0.4050 0.0000 C 0 0 0 0 0 0 0 0 0 0 0 0 5.4641 0.9050 0.0000 C 0 0 0 0 0 0 0 0 0 0 0 0 7.1962 0.9050 0.0000 C 0 0 0 0 0 0 0 0 0 0 0 0 4.5981 0.4050 0.0000 C 0 0 0 0 0 0 0 0 0 0 0 0 8.0622 0.4…	Myrmicacin	C10 H20 O3	188.141	24790	159
	FALSE	# ACD/Labs04281712162D 13 12 0 0 0 0 0 0 0 0 1 V2000 0.0000 -6.9055 0.0000 O 0 0 0 0 0 0 0 0 0 0 0 0 1.3336 -6.9055 0.0000 C 0 0 0 0 0 0 0 0 0 0 0 0 1.9891 -5.7527 0.0000 C 0 0 0 0 0 0 0 0 0 0 0 0 3.3228 -5.7527 0.0000 C 0 0 0 0 0 0 0 0 0 0 0 0 3.9896 -4.5999 0.0000 C 0 0 0 0 0 0 0 0 0 0 0 0 5.3232 -4.5999 0.0000 C 0 0 0 0 0 0 0 0 0 0 0 0 5.9787 -3.4471 0.0000 C 0 0 0 0 0 0 0 0 0 0 0 0 7.3123 -3.…	10-Hydroxydecanoic acid	C10 H20 O3	188.141	66903	152
	FALSE	#21488 -OEChem-02070708212D 33 32 0 1 0 0 0 0 0999 V2000 8.9282 -1.0950 0.0000 O 0 0 0 0 0 0 0 0 0 0 0 0 10.6603 -0.0950 0.0000 O 0 0 0 0 0 0 0 0 0 0 0 0 9.7942 1.4050 0.0000 O 0 0 0 0 0 0 0 0 0 0 0 0 6.3301 0.4050 0.0000 C 0 0 0 0 0 0 0 0 0 0 0 0 5.4641 -0.0950 0.0000 C 0 0 0 0 0 0 0 0 0 0 0 0 7.1962 -0.0950 0.0000 C 0 0 0 0 0 0 0 0 0 0 0 0 4.5981 0.4050 0.0000 C 0 0 0 0 0 0 0 0 0 0 0 0 3.7321 -…	Hydroxycapric acid	C10 H20 O3	188.141	20195	73
	FALSE	#110975 -OEChem-02070708202D 33 32 0 1 0 0 0 0 0999 V2000 6.3301 -0.5950 0.0000 O 0 0 0 0 0 0 0 0 0 0 0 0 8.9282 0.9050 0.0000 O 0 0 0 0 0 0 0 0 0 0 0 0 8.0622 -0.5950 0.0000 O 0 0 0 0 0 0 0 0 0 0 0 0 5.4641 0.9050 0.0000 C 0 0 0 0 0 0 0 0 0 0 0 0 4.5981 0.4050 0.0000 C 0 0 0 0 0 0 0 0 0 0 0 0 6.3301 0.4050 0.0000 C 0 0 3 0 0 0 0 0 0 0 0 0 3.7321 0.9050 0.0000 C 0 0 0 0 0 0 0 0 0 0 0 0 7.1962 0.9…	Ethyl 3-hydroxyoctanoate	C10 H20 O3	188.141	99620	66
	FALSE	# ACD/Labs02200711232D 13 12 0 0 0 0 0 0 0 0 1 V2000 0.0000 -0.4910 0.0000 O 0 0 0 0 0 0 0 0 0 0 0 0 1.1511 -1.1592 0.0000 C 0 0 0 0 0 0 0 0 0 0 0 0 2.2942 -1.8193 0.0000 C 0 0 0 0 0 0 0 0 0 0 0 0 2.2942 -3.1556 0.0000 O 0 0 0 0 0 0 0 0 0 0 0 0 0.4830 -2.3103 0.0000 C 0 0 0 0 0 0 0 0 0 0 0 0 1.8193 0.0000 0.0000 C 0 0 0 0 0 0 0 0 0 0 0 0 3.4453 -1.1592 0.0000 C 0 0 0 0 0 0 0 0 0 0 0 0 4.6045 -1.8…	2,6-Dimethyl-7-octene-2,3,6-triol	C10 H20 O3	188.141	10260607	37
	FALSE	# ACD/Labs04281713042D 33 32 0 0 1 0 0 0 0 0 1 V2000 11.5053 -3.5466 0.0000 O 0 0 0 0 0 0 0 0 0 0 0 0 16.0362 -0.9333 0.0000 O 0 0 0 0 0 0 0 0 0 0 0 0 14.5259 -3.5466 0.0000 O 0 0 0 0 0 0 0 0 0 0 0 0 8.4848 -1.7988 0.0000 C 0 0 0 0 0 0 0 0 0 0 0 0 6.9745 -0.9333 0.0000 C 0 0 0 0 0 0 0 0 0 0 0 0 9.9950 -0.9333 0.0000 C 0 0 0 0 0 0 0 0 0 0 0 0 5.4642 -1.7988 0.0000 C 0 0 0 0 0 0 0 0 0 0 0 0 11.5053…	D-3-Hydroxydecanoic acid	C10 H20 O3	188.141	4472223	32
	FALSE	#4575239 -OEChem-02070709532D 33 32 0 1 0 0 0 0 0999 V2000 11.1972 0.7500 0.0000 O 0 0 0 0 0 0 0 0 0 0 0 0 2.5369 0.7500 0.0000 O 0 0 0 0 0 0 0 0 0 0 0 0 3.4030 -0.7500 0.0000 O 0 0 0 0 0 0 0 0 0 0 0 0 7.7331 0.7500 0.0000 C 0 0 0 0 0 0 0 0 0 0 0 0 6.8671 0.2500 0.0000 C 0 0 0 0 0 0 0 0 0 0 0 0 8.5991 0.2500 0.0000 C 0 0 0 0 0 0 0 0 0 0 0 0 6.0010 0.7500 0.0000 C 0 0 0 0 0 0 0 0 0 0 0 0 9.4651 0.…	MFCD00154340	C10 H20 O3	188.141	3768033	29
	FALSE	#15571 -OEChem-02070708202D 33 33 0 1 0 0 0 0 0999 V2000 5.0929 -0.8341 0.0000 O 0 0 0 0 0 0 0 0 0 0 0 0 5.5929 0.7048 0.0000 O 0 0 0 0 0 0 0 0 0 0 0 0 2.5897 0.1138 0.0000 O 0 0 0 0 0 0 0 0 0 0 0 0 5.9019 -0.2463 0.0000 C 0 0 3 0 0 0 0 0 0 0 0 0 6.8529 -0.5553 0.0000 C 0 0 0 0 0 0 0 0 0 0 0 0 7.5961 0.1138 0.0000 C 0 0 0 0 0 0 0 0 0 0 0 0 4.2839 -0.2463 0.0000 C 0 0 3 0 0 0 0 0 0 0 0 0 8.5471 -0…	HEPTANAL 1,2-GLYCERYL ACETAL	C10 H20 O3	188.141	14814	26
	FALSE	#74361 -OEChem-02070708222D 33 33 0 0 0 0 0 0 0999 V2000 8.0622 -1.0000 0.0000 O 0 0 0 0 0 0 0 0 0 0 0 0 7.1962 0.5000 0.0000 O 0 0 0 0 0 0 0 0 0 0 0 0 9.7942 1.0000 0.0000 O 0 0 0 0 0 0 0 0 0 0 0 0 6.3301 -1.0000 0.0000 C 0 0 0 0 0 0 0 0 0 0 0 0 7.1962 -0.5000 0.0000 C 0 0 0 0 0 0 0 0 0 0 0 0 5.4641 -0.5000 0.0000 C 0 0 0 0 0 0 0 0 0 0 0 0 4.5981 -1.0000 0.0000 C 0 0 0 0 0 0 0 0 0 0 0 0 8.9282 0…	2-Hexyl-1,3-dioxan-5-ol	C10 H20 O3	188.141	66956	23
	FALSE	#186702 -OEChem-02070708192D 33 33 0 1 0 0 0 0 0999 V2000 4.7690 2.5880 0.0000 O 0 0 0 0 0 0 0 0 0 0 0 0 2.5369 1.7220 0.0000 O 0 0 0 0 0 0 0 0 0 0 0 0 4.2690 -2.2780 0.0000 O 0 0 0 0 0 0 0 0 0 0 0 0 4.2690 -0.2780 0.0000 C 0 0 3 0 0 0 0 0 0 0 0 0 4.2690 1.7220 0.0000 C 0 0 3 0 0 0 0 0 0 0 0 0 3.4030 0.2220 0.0000 C 0 0 0 0 0 0 0 0 0 0 0 0 5.1350 0.2220 0.0000 C 0 0 0 0 0 0 0 0 0 0 0 0 3.4030 1.2…	4-(2-Hydroxy-2-propanyl)-1-methyl-1,2-cyclohexanediol	C10 H20 O3	188.141	162298	17
	FALSE	#126863 -OEChem-02070708212D 33 33 0 0 0 0 0 0 0999 V2000 2.6200 2.3195 0.0000 O 0 0 0 0 0 0 0 0 0 0 0 0 3.1200 -2.5465 0.0000 O 0 0 0 0 0 0 0 0 0 0 0 0 4.6200 2.3195 0.0000 O 0 0 0 0 0 0 0 0 0 0 0 0 3.1200 -0.5465 0.0000 C 0 0 0 0 0 0 0 0 0 0 0 0 3.1200 1.4535 0.0000 C 0 0 0 0 0 0 0 0 0 0 0 0 2.2540 -0.0465 0.0000 C 0 0 0 0 0 0 0 0 0 0 0 0 3.9860 -0.0465 0.0000 C 0 0 0 0 0 0 0 0 0 0 0 0 2.2540 0…	1-(Hydroxymethyl)-4-(2-hydroxy-2-propanyl)cyclohexanol	C10 H20 O3	188.141	112663	16
	FALSE	# ACD/Labs04221415492D 13 12 0 0 0 0 0 0 0 0 1 V2000 2.3605 -2.6789 0.0000 O 0 0 0 0 0 0 0 0 0 0 0 0 3.4897 -6.0064 0.0000 O 0 0 0 0 0 0 0 0 0 0 0 0 4.6249 -4.0123 0.0000 O 0 0 0 0 0 0 0 0 0 0 0 0 1.1652 -4.6790 0.0000 C 0 0 0 0 0 0 0 0 0 0 0 0 1.1652 -2.0182 0.0000 C 0 0 0 0 0 0 0 0 0 0 0 0 0.0360 -4.0123 0.0000 C 0 0 0 0 0 0 0 0 0 0 0 0 0.0360 -2.6789 0.0000 C 0 0 0 0 0 0 0 0 0 0 0 0 2.3605 -4.…	6-Hydroxy-3,7-dimethyloctanoic acid	C10 H20 O3	188.141	10466769	8
	FALSE	#10607654 -OEChem-02070712162D 33 32 0 1 0 0 0 0 0999 V2000 4.2690 1.0950 0.0000 O 0 0 0 0 0 0 0 0 0 0 0 0 2.5369 -0.9050 0.0000 O 0 0 0 0 0 0 0 0 0 0 0 0 9.4651 0.0950 0.0000 O 0 0 0 0 0 0 0 0 0 0 0 0 4.2690 0.0950 0.0000 C 0 0 3 0 0 0 0 0 0 0 0 0 3.4030 -0.4050 0.0000 C 0 0 0 0 0 0 0 0 0 0 0 0 5.1350 -0.4050 0.0000 C 0 0 0 0 0 0 0 0 0 0 0 0 6.0010 0.0950 0.0000 C 0 0 0 0 0 0 0 0 0 0 0 0 2.9030 …	7-Methyl-3-methylene-1,6,7-octanetriol	C10 H20 O3	188.141	8783021	7
	FALSE	# ACD/Labs08121512292D 13 13 0 0 0 0 0 0 0 0 1 V2000 0.0000 -1.9961 0.0000 C 0 0 0 0 0 0 0 0 0 0 0 0 0.0000 -3.3268 0.0000 C 0 0 0 0 0 0 0 0 0 0 0 0 1.1511 -3.9922 0.0000 C 0 0 0 0 0 0 0 0 0 0 0 0 2.3022 -3.3268 0.0000 C 0 0 0 0 0 0 0 0 0 0 0 0 2.3022 -1.9961 0.0000 C 0 0 0 0 0 0 0 0 0 0 0 0 1.1511 -1.3307 0.0000 C 0 0 0 0 0 0 0 0 0 0 0 0 1.1511 0.0000 0.0000 C 0 0 0 0 0 0 0 0 0 0 0 0 3.4532 -1.3…	2-(3-Hydroxy-4-methylcyclohexyl)-1,2-propanediol	C10 H20 O3	188.141	35013631	1
	FALSE	# ACD/Labs08121512362D 13 13 0 0 0 0 0 0 0 0 1 V2000 3.4534 -5.6739 0.0000 C 0 0 0 0 0 0 0 0 0 0 0 0 1.4500 0.0000 0.0000 C 0 0 0 0 0 0 0 0 0 0 0 0 3.4534 -3.0121 0.0000 C 0 0 0 0 0 0 0 0 0 0 0 0 3.4534 -1.6812 0.0000 C 0 0 0 0 0 0 0 0 0 0 0 0 1.1488 -3.0121 0.0000 C 0 0 0 0 0 0 0 0 0 0 0 0 1.1488 -5.6739 0.0000 C 0 0 0 0 0 0 0 0 0 0 0 0 2.3046 -5.0085 0.0000 C 0 0 0 0 0 0 0 0 0 0 0 0 2.3046 -3.6…	4-(1-Hydroxy-2-propanyl)-1-methyl-1,2-cyclohexanediol	C10 H20 O3	188.141	35014808	1
FALSE	(−)-nabilone	C24 H36 O3	Full match	Full match		372.266	11.35	5.97882e+08	5	No MS2	209951	15593.2	273064	1.43679e+08	1.56472e+08	9.93981e+07	3.25046e+07	4.80328e+07	1.84199e+08	5.16066e+07	2.85148e+07	3.17967e+08	7.56008e+07	1.19981e+08	260816	1.11464e+08	1.04897e+08	7.99079e+07	6.53754e+07	4.8852e+07	5.59123e+08	3.7414e+07	638828	4.78285e+08	304571	1.47704e+08	1.39058e+08	6.89055e+07	3.06748e+07	3.61467e+06	3.7619e+08	9.27136e+07	2.46033e+07	9.16611e+07	290362	261343	1.3764e+08	1.23412e+08	4.15354e+07
	Checked	Structure	Name	Formula	Molecular Weight	CSID	# References
	FALSE	# ACD/Labs04221415492D 29 31 0 0 1 0 0 0 0 0 1 V2000 2.6254 -5.8482 0.0000 O 0 0 0 0 0 0 0 0 0 0 0 0 4.8758 -1.9448 0.0000 O 0 0 0 0 0 0 0 0 0 0 0 0 1.5002 0.0000 0.0000 O 0 0 0 0 0 0 0 0 0 0 0 0 2.6254 -3.2505 0.0000 C 0 0 0 0 0 0 0 0 0 0 0 0 1.4864 -3.8895 0.0000 C 0 0 0 0 0 0 0 0 0 0 0 0 3.7367 -3.8895 0.0000 C 0 0 0 0 0 0 0 0 0 0 0 0 1.4864 -5.2092 0.0000 C 0 0 0 0 0 0 0 0 0 0 0 0 3.7367 -5.2…	(−)-nabilone	C24 H36 O3	372.266	4447641	74
	FALSE	# ACD/Labs04281710582D 30 33 0 0 1 0 0 0 0 0 1 V2000 7.8878 -1.3045 0.0000 O 0 0 0 0 0 0 0 0 0 0 0 0 7.8979 0.0000 0.0000 O 0 0 0 0 0 0 0 0 0 0 0 0 9.0103 -3.2562 0.0000 O 0 0 0 0 0 0 0 0 0 0 0 0 5.6327 -3.9135 0.0000 C 0 0 0 0 0 0 0 0 0 0 0 0 4.5102 -4.5608 0.0000 C 0 0 0 0 0 0 0 0 0 0 0 0 5.6327 -2.6090 0.0000 C 0 0 0 0 0 0 0 0 0 0 0 0 3.3776 -3.9135 0.0000 C 0 0 0 0 0 0 0 0 0 0 0 0 6.7653 -1.9…	ANAGESTONE ACETATE	C24 H36 O3	372.266	221058	17
[truncated: 52,182 more rows]
[truncated: 43 more columns]
