# Supplementary material for: Differential impact of rhamnolipids and TWEEN80 on the composition and functionality of the gut microbiota in the SHIME system.
Source: Research Square preprint supplement (doi:10.21203/rs.3.rs-1340099/v1), 2022-02-11
Supplement: Supplementary file 4 [file b8feb759113a3af3dc0c5f41.xlsx]

## Sheet: S2_mgL
n°	Timepoint	Emulsifier	EM_Conc	acetic acid	propionic acid	isobutyric acid	butyric acid	isovaleric acid	valeric acid	isocaproic acid	caproic acid	ISTD	heptanoic acid	Octanoic acid
2	2	Control	0	2818.86	485.594	0	30.1633	8.95466	0	0	0	0	0	0
3	2	P80	0.05	3258.52	622.313	54.7588	70.935	88.6661	0	17.2309	0	0	0	0
4	2	P80	0.5	3309.33	620.465	10.8328	35.8035	13.3548	0	0	0	0	0	0
7	2	RL	0.05	3203.74	582.235	0	38.8834	9.58264	0	0	0	0	0	0
8	2	RL	0.5	3027.89	471.164	0	28.0654	10.6992	0	0	0	0	0	0
10	3	Control	0	2525.86	510.715	9.93266	360.047	13.3218	0	0	0	0	0	0
11	3	P80	0.05	2273.31	465.144	53.7374	202.98	84.5992	0	8.15372	0	0	0	0
12	3	P80	0.5	2888	613.186	11.8426	318.147	17.5068	0	0	0	0	0	0
15	3	RL	0.05	2638.92	507.978	11.1793	520.63	14.6857	0	0	0	0	0	0
16	3	RL	0.5	1455.86	344.04	0	187.206	0	0	0	0	0	0	0
2	4	Control	0	1837.61	544.871	60.1062	866.059	102.097	9.71057	0	0	0	0	0
3	4	P80	0.05	1782.69	677.058	23.7958	660.649	50.7875	11.5182	0	0	0	0	0
4	4	P80	0.5	1816.13	614.679	21.0945	658.768	49.685	9.3501	0	0	0	0	0
7	4	RL	0.05	1706.36	506.775	32.0282	615.384	67.3709	8.59233	0	0	0	0	0
8	4	RL	0.5	365.546	60.4144	0	146.773	0	0	0	0	0	0	0
10	5	Control	0	1781.77	686.451	64.7931	876.003	103.722	9.8449	0	0	0	0	0
11	5	P80	0.05	1625.97	787.409	57.8169	761.265	97.9865	13.5903	0	0	0	0	0
12	5	P80	0.5	1863.73	772.293	43.7602	648.936	89.5854	11.1174	0	0	0	0	0
15	5	RL	0.05	1760.14	707.084	65.6666	860.686	105.298	12.3591	0	0	0	0	0
16	5	RL	0.5	732.908	93.0176	0	428.85	0	0	0	0	0	0	0
2	6	Control	0	1637.63	555.492	62.7632	935.5	106.506	10.6811	0	14.3268	0	0	0
3	6	P80	0.05	1704.62	782.731	61.3882	1147.4	106.271	18.631	0	10.2315	0	0	0
4	6	P80	0.5	1910.03	744.337	64.621	875.941	109.419	14.7927	0	7.21746	0	0	0
7	6	RL	0.05	1655.79	719.506	64.5121	944.158	105.496	14.9929	0	0	0	0	0
8	6	RL	0.5	1083.11	475.742	0	132.047	10.9113	0	0	0	0	0	0
10	8	Control	0	1786.6	566.023	62.6597	1003.82	102.911	10.7056	0	0	0	0	0
11	8	P80	0.05	1650.71	699.019	62.495	1199.4	114.735	17.482	0	0	0	0	0
12	8	P80	0.5	1875.96	656.011	59.0918	1058.06	107.462	15.0525	0	0	0	0	0
15	8	RL	0.05	1610.15	725.996	65.2718	1025.72	115.397	14.2681	0	0	0	0	0
16	8	RL	0.5	1686.72	801.258	12.404	118.367	27.269	0	0	0	0	0	0
18	9	Control	0	1939.82	598.892	65.6487	1097.69	107.019	11.2724	0	0	0	0	0
19	9	P80	0.05	1770.59	691.208	62.4034	1057.46	104.792	15.1041	0	0	0	0	0
20	9	P80	0.5	1728.95	619.727	58.085	1076.59	102.517	14.3672	0	0	0	0	0
23	9	RL	0.05	1520.74	773.573	67.1117	951.859	118.962	14.8355	0	0	0	0	0
24	9	RL	0.5	1357.86	605.041	47.6191	635.731	83.5388	9.179	0	0	0	0	0
2	10	Control	0	1752.5	567.111	63.6764	1091.5	108.374	13.3302	0	8.85784	0	0	0
3	10	P80	0.05	2018.65	685.498	39.9602	670.332	68.3905	13.8573	0	0	0	0	0
4	10	P80	0.5	1843.17	637.93	48.4611	717.849	89.0159	13.0097	0	0	0	0	0
7	10	RL	0.05	1690.12	763.187	58.424	963.27	108.168	14.5935	0	0	0	0	0
8	10	RL	0.5	1816.96	817.231	60.5222	889.876	103.901	13.8569	0	0	0	0	0
10	11	Control	0	1843.33	563.719	62.5156	1000.87	109.514	11.588	0	0	0	0	0
11	11	P80	0.05	519.003	179.722	19.8003	187.655	32.0272	0	0	0	0	0	0
12	11	P80	0.5	2025.14	654.644	61.1263	656.269	108.378	11.5288	0	0	0	0	0
15	11	RL	0.05	1749.96	703.787	58.902	883.436	108.533	14.0951	0	0	0	0	0
16	11	RL	0.5	1971.66	791.199	60.3955	718.827	103.504	11.8232	0	0	0	0	0
18	11.5	Control	0	1854.57	523.227	46.4085	858.469	84.6515	11.7201	0	0	0	0	0
19	11.5	P80	0.05	1254.22	314.21	20.0762	235.205	37.1178	0	0	0	0	0	0
20	11.5	P80	0.5	1955.93	580.513	48.3478	568.012	84.6996	14.2315	0	0	0	0	0
23	11.5	RL	0.05	1658.24	611.237	41.5261	719.025	77.7614	11.6093	0	0	0	0	0
24	11.5	RL	0.5	1869.31	791.883	45.3805	557.255	80.7276	11.2518	0	0	0	0	0
2	12	Control	0	1640.77	531.716	52.5217	813.584	92.1867	11.0991	0	0	0	0	0
3	12	P80	0.05	1586.69	490.896	45.3199	486.767	72.5704	8.14832	0	0	0	0	0
4	12	P80	0.5	1563.12	579.789	52.6476	741.405	83.0496	12.4903	0	0	0	0	0
7	12	RL	0.05	1510.63	734.6	52.2432	497.654	98.6728	8.7715	0	0	0	0	0
8	12	RL	0.5	1237.2	655.087	23.0701	309.159	44.2939	7.37163	0	0	0	0	15.0905
10	14	Control	0	1916.02	555.32	51.2516	730.042	89.0083	10.443	0	0	0	0	0
11	14	P80	0.05	1871.16	546.387	54.3285	699.149	90.2656	24.0684	0	0	0	0	0
12	14	P80	0.5	1490.73	574.099	50.9983	951.533	81.004	12.6213	0	0	0	0	0
15	14	RL	0.05	1228.68	725.342	49.9278	310.768	89.9912	0	0	0	0	0	0
16	14	RL	0.5	1643.56	468.899	0	111.223	13.625	0	0	0	0	0	13.4105
39	16	Control	0	1681.31	690.133	54.5421	705.727	92.0173	11.4303	0	0	0	0	0
40	16	P80	0.05	2043.34	430.791	54.5267	645.447	92.233	73.4826	0	0	0	0	0
41	16	P80	0.5	1554.4	541.81	59.7612	973.743	95.5691	13.5679	0	0	0	0	0
44	16	RL	0.05	1623.38	807.007	54.127	365.324	95.2747	0	0	0	0	0	0
45	16	RL	0.5	1706.08	557.607	10.4475	115.861	12.6774	0	0	0	0	0	13.6441
47	18	Control	0	1599.75	723.113	51.8979	593.735	86.9076	11.9326	0	0	0	0	0
48	18	P80	0.05	2058.29	529.572	59.7856	671.92	89.6348	67.5875	0	0	0	0	0
49	18	P80	0.5	1525.51	413.188	55.1949	842.589	86.4016	11.2443	0	0	0	0	0
52	18	RL	0.05	1522.18	704.1	46.8599	273.477	85.6172	0	0	0	0	0	0
53	18	RL	0.5	1572.11	633.906	0	108.881	14.4408	0	0	0	0	0	0

## Sheet: S2_mmolL
n°	Timepoint	Emulsifier	EM_Conc	SHIME	acetic acid	propionic acid	isobutyric acid	butyric acid	isovaleric acid	valeric acid	isocaproic acid	caproic acid	ISTD	heptanoic acid	Octanoic acid	Sum
2	2	Control	0	2	93.9619	13.1242	0	0.685529	0.175582	0	0	0	0	0	0	107.947
3	2	P80	0.05	2	108.617	16.8193	1.24452	1.61216	1.73855	0	0.297085	0	0	0	0	130.329
4	2	P80	0.5	2	110.311	16.7693	0.2462	0.813717	0.261859	0	0	0	0	0	0	128.402
7	2	RL	0.05	2	106.791	15.7361	0	0.883714	0.187895	0	0	0	0	0	0	123.599
8	2	RL	0.5	2	100.93	12.7342	0	0.637851	0.209788	0	0	0	0	0	0	114.511
10	3	Control	0	2	84.1955	13.8031	0.225742	8.18289	0.261211	0	0	0	0	0	0	106.668
11	3	P80	0.05	2	75.7769	12.5714	1.2213	4.61319	1.65881	0	0.140581	0	0	0	0	95.9822
12	3	P80	0.5	2	96.2667	16.5726	0.269149	7.23061	0.34327	0	0	0	0	0	0	120.682
15	3	RL	0.05	2	87.9641	13.7291	0.254075	11.8325	0.287956	0	0	0	0	0	0	114.068
16	3	RL	0.5	2	48.5285	9.29837	0	4.25468	0	0	0	0	0	0	0	62.0816
2	4	Control	0	2	61.2536	14.7262	1.36605	19.6832	2.0019	0.190403	0	0	0	0	0	99.2214
3	4	P80	0.05	2	59.4228	18.2989	0.540814	15.0148	0.995833	0.225846	0	0	0	0	0	94.499
4	4	P80	0.5	2	60.5378	16.6129	0.479421	14.972	0.974216	0.183335	0	0	0	0	0	93.7598
7	4	RL	0.05	2	56.8786	13.6966	0.727914	13.986	1.321	0.168477	0	0	0	0	0	86.7786
8	4	RL	0.5	2	12.1849	1.63282	0	3.33575	0	0	0	0	0	0	0	17.1534
10	5	Control	0	2	59.3923	18.5527	1.47257	19.9092	2.03375	0.193037	0	0	0	0	0	101.554
11	5	P80	0.05	2	54.199	21.2813	1.31402	17.3015	1.9213	0.266476	0	0	0	0	0	96.2836
12	5	P80	0.5	2	62.1242	20.8728	0.99455	14.7485	1.75658	0.217989	0	0	0	0	0	100.715
15	5	RL	0.05	2	58.6714	19.1104	1.49242	19.561	2.06468	0.242335	0	0	0	0	0	101.142
16	5	RL	0.5	2	24.4303	2.51399	0	9.74659	0	0	0	0	0	0	0	36.6908
2	6	Control	0	2	54.5877	15.0133	1.42644	21.2614	2.08835	0.209434	0	0.247013	0	0	0	94.8336
3	6	P80	0.05	2	56.8206	21.1549	1.39519	26.0773	2.08375	0.365315	0	0.176405	0	0	0	108.073
4	6	P80	0.5	2	63.6676	20.1172	1.46866	19.9077	2.14547	0.290053	0	0.124439	0	0	0	107.721
7	6	RL	0.05	2	55.193	19.4461	1.46618	21.4581	2.06855	0.293978	0	0	0	0	0	99.926
8	6	RL	0.5	2	36.1038	12.8579	0	3.00107	0.213947	0	0	0	0	0	0	52.1767
10	8	Control	0	2	59.5533	15.2979	1.42408	22.814	2.01786	0.209913	0	0	0	0	0	101.317
11	8	P80	0.05	2	55.0236	18.8924	1.42034	27.259	2.24971	0.342785	0	0	0	0	0	105.188
12	8	P80	0.5	2	62.5319	17.73	1.34299	24.0468	2.10709	0.295147	0	0	0	0	0	108.054
15	8	RL	0.05	2	53.6715	19.6215	1.48345	23.3117	2.26269	0.279767	0	0	0	0	0	100.631
16	8	RL	0.5	2	56.224	21.6556	0.281909	2.69015	0.534686	0	0	0	0	0	0	81.3864
18	9	Control	0	2	64.6606	16.1863	1.49202	24.9474	2.09841	0.221027	0	0	0	0	0	109.606
19	9	P80	0.05	2	59.0197	18.6813	1.41826	24.0332	2.05474	0.296158	0	0	0	0	0	105.503
20	9	P80	0.5	2	57.6318	16.7494	1.32011	24.468	2.01014	0.281709	0	0	0	0	0	102.461
23	9	RL	0.05	2	50.6914	20.9074	1.52527	21.6332	2.33259	0.290893	0	0	0	0	0	97.3806
24	9	RL	0.5	2	45.262	16.3525	1.08225	14.4484	1.63802	0.17998	0	0	0	0	0	78.9631
2	10	Control	0	2	58.4167	15.3273	1.44719	24.8067	2.12497	0.261376	0	0.152721	0	0	0	102.537
3	10	P80	0.05	2	67.2884	18.527	0.908186	15.2348	1.34099	0.271711	0	0	0	0	0	103.571
4	10	P80	0.5	2	61.439	17.2414	1.10139	16.3147	1.74541	0.255092	0	0	0	0	0	98.0969
7	10	RL	0.05	2	56.3374	20.6267	1.32782	21.8925	2.12093	0.286147	0	0	0	0	0	102.591
8	10	RL	0.5	2	60.5653	22.0873	1.3755	20.2245	2.03727	0.271705	0	0	0	0	0	106.562
10	11	Control	0	2	61.4443	15.2357	1.42081	22.747	2.14734	0.227215	0	0	0	0	0	103.222
11	11	P80	0.05	2	17.3001	4.85736	0.450007	4.26487	0.627984	0	0	0	0	0	0	27.5003
12	11	P80	0.5	2	67.5046	17.6931	1.38923	14.9152	2.12505	0.226055	0	0	0	0	0	103.853
15	11	RL	0.05	2	58.3321	19.0213	1.33868	20.0781	2.1281	0.276375	0	0	0	0	0	101.175
16	11	RL	0.5	2	65.722	21.3838	1.37262	16.337	2.02948	0.231826	0	0	0	0	0	107.077
18	11.5	Control	0	2	61.8191	14.1413	1.05474	19.5107	1.65983	0.229806	0	0	0	0	0	98.4154
19	11.5	P80	0.05	2	41.8074	8.49216	0.456276	5.34557	0.727799	0	0	0	0	0	0	56.8292
20	11.5	P80	0.5	2	65.1978	15.6895	1.09881	12.9094	1.66078	0.279049	0	0	0	0	0	96.8353
23	11.5	RL	0.05	2	55.2745	16.5199	0.943775	16.3415	1.52473	0.227633	0	0	0	0	0	90.8321
24	11.5	RL	0.5	2	62.3103	21.4022	1.03138	12.6649	1.58289	0.220624	0	0	0	0	0	99.2123
2	12	Control	0	2	54.6923	14.3707	1.19367	18.4906	1.80758	0.217629	0	0	0	0	0	90.7724
3	12	P80	0.05	2	52.8896	13.2675	1.03	11.0629	1.42295	0.159771	0	0	0	0	0	79.8327
4	12	P80	0.5	2	52.104	15.67	1.19654	16.8501	1.62842	0.244909	0	0	0	0	0	87.694
7	12	RL	0.05	2	50.3542	19.8541	1.18735	11.3103	1.93476	0.17199	0	0	0	0	0	84.8127
8	12	RL	0.5	2	41.2401	17.7051	0.52432	7.02635	0.868508	0.144542	0	0	0	0	0.20959	67.7185
10	14	Control	0	2	63.8672	15.0087	1.16481	16.5919	1.74526	0.204765	0	0	0	0	0	98.5826
11	14	P80	0.05	2	62.372	14.7672	1.23474	15.8898	1.76991	0.47193	0	0	0	0	0	96.5055
12	14	P80	0.5	2	49.6911	15.5162	1.15905	21.6258	1.58831	0.247476	0	0	0	0	0	89.8278
15	14	RL	0.05	2	40.956	19.6038	1.13472	7.06292	1.76453	0	0	0	0	0	0	70.522
16	14	RL	0.5	2	54.7854	12.673	0	2.5278	0.267158	0	0	0	0	0	0.186257	70.4396
39	16	Control	0	2	56.0438	18.6523	1.23959	16.0393	1.80426	0.224124	0	0	0	0	0	94.0033
40	16	P80	0.05	2	68.1113	11.643	1.23924	14.6692	1.80849	1.44083	0	0	0	0	0	98.9121
41	16	P80	0.5	2	51.8135	14.6435	1.35821	22.1305	1.8739	0.266038	0	0	0	0	0	92.0856
44	16	RL	0.05	2	54.1126	21.811	1.23016	8.30283	1.86813	0	0	0	0	0	0	87.3247
45	16	RL	0.5	2	56.8692	15.0705	0.237443	2.63321	0.248576	0	0	0	0	0	0.189502	75.2484
47	18	Control	0	2	53.3249	19.5436	1.1795	13.494	1.70407	0.233972	0	0	0	0	0	89.48
48	18	P80	0.05	2	68.6098	14.3127	1.35876	15.2709	1.75754	1.32524	0	0	0	0	0	102.635
49	18	P80	0.5	2	50.8504	11.1672	1.25443	19.1498	1.69415	0.220476	0	0	0	0	0	84.3364
52	18	RL	0.05	2	50.7393	19.0297	1.065	6.21538	1.67877	0	0	0	0	0	0	78.7282
53	18	RL	0.5	2	52.4035	17.1326	0	2.47456	0.283153	0	0	0	0	0	0	72.2939

## Sheet: S3_mgL
n°	Day	EM	EM_Conc	acetic acid	propionic acid	isobutyric acid	butyric acid	isovaleric acid	valeric acid	isocaproic acid	caproic acid	ISTD	heptanoic acid	Octanoic acid
25	2	Control	0	2027.56	886.28	18.1244	1252.7	20.0916	101.997	0	7.78885	0	0	0
26	2	Tween80	0.05	2068.93	729.98	10.3707	672.076	8.27432	23.6247	0	0	0	0	0
27	2	Tween80	0.5	2130.22	897.197	20.6546	1154.71	25.2738	122.696	0	7.60632	0	0	0
30	2	RL	0.05	2080.3	910.48	23.8781	1152.56	30.8549	133.743	0	7.76157	0	0	0
31	2	RL	0.5	2135.83	937.809	20.1935	1173.17	28.2831	133.57	0	7.5009	0	0	0
33	3	Control	0	1969.86	902.773	16.1884	1396.35	24.5641	114.109	0	0	0	0	0
34	3	Tween80	0.05	2063.26	936.824	13.2839	1015.12	17.7096	49.9876	0	0	0	0	0
35	3	Tween80	0.5	418.638	211.815	0	216.365	8.47715	18.8332	0	0	0	0	0
38	3	RL	0.05	2015.38	1061.26	18.5977	1201.49	25.9158	118.058	0	7.92688	0	0	0
39	3	RL	0.5	1836.8	1037.9	21.5193	1213.31	27.5947	115.466	0	0	0	0	0
41	5	Control	0	1787.9	1664.61	9.76955	842.795	15.6791	46.9078	0	0	0	0	0
42	5	Tween80	0.05	1805.07	1694.89	11.5	621.057	15.6957	26.2163	0	0	0	0	0
43	5	Tween80	0.5	1881.59	1778.86	11.1876	451.265	11.7952	14.7527	0	0	0	0	0
46	5	RL	0.05	1700.63	1531.77	9.97732	783.657	14.7969	47.6237	0	0	0	0	0
47	5	RL	0.5	1662.42	1514.29	0	775.731	14.7989	44.2529	0	0	0	0	0
2	7	Control	0	1572.38	1596.51	0	692.586	8.55893	18.3885	0	0	0	0	0
3	7	Tween80	0.05	1580.65	1487.3	9.94373	711.282	12.9375	23.8133	0	0	0	0	0
4	7	Tween80	0.5	1662.86	1693.79	0	598.406	10.0137	14.616	0	0	0	0	0
7	7	RL	0.05	1570.47	1497.91	0	743.464	10.5025	31.3035	0	0	0	0	0
8	7	RL	0.5	1499.6	1435.28	11.6457	753.016	12.9977	37.9009	0	0	0	0	0
10	8	Control	0	1810.37	1745.29	0	817.621	12.8533	20.2656	0	0	0	0	0
11	8	Tween80	0.05	1723.76	1575.59	10.0049	740.177	17.0811	22.6043	0	0	0	0	0
12	8	Tween80	0.5	1723.26	1696.9	0	641.81	9.54171	13.7449	0	0	0	0	0
15	8	RL	0.05	1716.23	1569.54	13.6237	786.078	12.647	29.1201	0	0	0	0	0
16	8	RL	0.5	1685.71	1585.37	12.4576	834.225	12.9914	29.5263	0	0	0	0	0
18	9	Control	0	1606.03	1571.27	0	770.094	13.1111	18.3184	0	0	0	0	0
19	9	Tween80	0.05	1679.23	1572.22	14.1376	718.153	16.0757	20.0344	0	0	0	0	0
20	9	Tween80	0.5	1692.63	1617.35	0	601.483	11.0587	13.6144	0	0	0	0	0
23	9	RL	0.05	1668.44	1548.79	0	732.282	12.7592	23.8477	0	0	0	0	0
24	9	RL	0.5	1711.75	1560.34	12.399	795.771	14.164	24.0469	0	0	0	0	0
2	9.5	Control	0	1254.76	1203.69	0	675.994	8.99341	15.9573	0	0	0	0	0
3	9.5	Tween80	0.05	1498.29	1267.97	0	665.918	11.2855	16.8015	0	0	0	0	0
4	9.5	Tween80	0.5	1621.24	1300.48	0	568.745	9.04237	12.379	0	0	0	0	0
7	9.5	RL	0.05	1385.05	1325.99	0	557.112	9.38214	17.9125	0	0	0	0	0
8	9.5	RL	0.5	1328.01	1406.63	0	522.362	10.8948	17.5334	0	0	0	0	0
10	10	Control	0	1522.67	1273.63	0	798.443	11.0071	17.7894	0	0	0	0	0
11	10	Tween80	0.05	1759.7	1122.44	9.84874	781.653	13.137	17.8749	0	0	0	0	0
12	10	Tween80	0.5	1918.69	1117.64	9.86088	694.958	10.8853	13.8813	0	0	0	0	0
15	10	RL	0.05	1537.88	1533.58	0	290.36	10.6924	10.0506	0	0	0	0	0
16	10	RL	0.5	1403.86	1405.3	0	196.497	13.6711	9.74121	0	0	0	0	0
18	12	Control	0	1746.06	1031.03	0	838.821	12.2855	17.2846	0	0	0	0	0
19	12	Tween80	0.05	1901.63	667.83	11.964	1083.46	19.336	20.0562	0	0	0	0	0
20	12	Tween80	0.5	1797.85	551.373	0	1400.77	12.6047	18.7425	0	0	0	0	0
23	12	RL	0.05	1591.49	1309.99	21.7005	143.725	60.6169	0	0	0	0	0	0
24	12	RL	0.5	1708.62	1450.93	0	154.448	20.3155	0	0	0	0	0	0
2	11	Control	0	1959.89	1674.4	10.514	1032.09	15.9978	20.538	0	13.0785	0	0	0
3	11	Tween80	0.05	2262.28	1045.66	11.9885	1470	17.983	25.9533	0	7.99825	0	0	0
4	11	Tween80	0.5	2127.9	864.328	11.3622	1476.13	16.0029	20.4643	0	0	0	0	0
7	11	RL	0.05	2088.04	2167.75	12.8378	220.189	30.3541	0	0	0	0	0	0
8	11	RL	0.5	1984.86	1954.62	0	207.6	22.1693	0	0	0	0	0	0
10	14	Control	0	1515.04	1004.72	11.9988	858.625	19.8832	17.2334	0	0	0	0	0
11	14	Tween80	0.05	1595.81	576.059	52.0395	1113.99	81.4892	18.4607	0	0	0	0	0
12	14	Tween80	0.5	1590.36	506.092	13.2744	1248.31	17.8806	19.4323	0	0	0	0	0
15	14	RL	0.05	1381.18	1561.11	43.8934	188.308	83.9997	0	0	0	0	0	0
16	14	RL	0.5	1420.04	1415.73	0	112.886	20.9299	0	0	0	0	0	0
18	16	Control	0	1474.07	1010.62	45.1459	921.108	72.2488	18.0388	0	0	0	0	0
19	16	Tween80	0.05	1615.13	569.412	51.1317	1137.4	74.4614	17.4498	0	0	0	0	0
20	16	Tween80	0.5	1659.04	504.918	17.2995	1188.51	30.6832	19.5925	0	0	0	0	0
23	16	RL	0.05	1357.96	1360.47	40.4412	164.64	77.1097	0	0	0	0	0	0
24	16	RL	0.5	1524.49	798.712	10.0236	103.843	22.3319	0	0	0	0	0	0

## Sheet: S3_mmolL
n°	Day	EM	EM_Conc	SHIME	acetic acid	propionic acid	isobutyric acid	butyric acid	isovaleric acid	valeric acid	isocaproic acid	caproic acid	ISTD	heptanoic acid	Octanoic acid	Sum
25	2	Control	0	3	67.5268	23.9277	0.411918	28.435	0.393953	1.99994	0	0.134291	0	0	0	122.83
26	2	Tween80	0.05	3	68.9047	19.7079	0.235698	15.2554	0.162242	0.46323	0	0	0	0	0	104.729
27	2	Tween80	0.5	3	70.9457	24.2224	0.469422	26.2107	0.495564	2.40579	0	0.131143	0	0	0	124.881
30	2	RL	0.05	3	69.2833	24.581	0.542684	26.1618	0.604998	2.62241	0	0.13382	0	0	0	123.93
31	2	RL	0.5	3	71.1325	25.3188	0.458943	26.6297	0.55457	2.61901	0	0.129326	0	0	0	126.843
33	3	Control	0	3	65.6052	24.3729	0.367917	31.6956	0.481648	2.23743	0	0	0	0	0	124.761
34	3	Tween80	0.05	3	68.7157	25.2922	0.301907	23.0422	0.347246	0.980149	0	0	0	0	0	118.679
35	3	Tween80	0.5	3	13.9425	5.71856	0	4.91125	0.166219	0.369278	0	0	0	0	0	25.1078
38	3	RL	0.05	3	67.1211	28.6518	0.422675	27.2725	0.508154	2.31487	0	0.13667	0	0	0	126.428
39	3	RL	0.5	3	61.1736	28.0211	0.489076	27.5409	0.541073	2.26404	0	0	0	0	0	120.03
41	5	Control	0	3	59.5452	44.9408	0.222035	19.1305	0.307433	0.91976	0	0	0	0	0	125.066
42	5	Tween80	0.05	3	60.1169	45.7584	0.261364	14.0973	0.30776	0.514046	0	0	0	0	0	121.056
43	5	Tween80	0.5	3	62.6652	48.0254	0.254265	10.2432	0.231279	0.289269	0	0	0	0	0	121.709
46	5	RL	0.05	3	56.6386	41.3545	0.226757	17.7881	0.290135	0.933798	0	0	0	0	0	117.232
47	5	RL	0.5	3	55.366	40.8827	0	17.6082	0.290175	0.867704	0	0	0	0	0	115.015
2	7	Control	0	3	52.3673	43.1022	0	15.7209	0.167822	0.360559	0	0	0	0	0	111.719
3	7	Tween80	0.05	3	52.6429	40.1539	0.225994	16.1453	0.253677	0.466927	0	0	0	0	0	109.889
4	7	Tween80	0.5	3	55.3806	45.7287	0	13.5832	0.196348	0.286589	0	0	0	0	0	115.175
7	7	RL	0.05	3	52.3036	40.4405	0	16.8758	0.205931	0.613794	0	0	0	0	0	110.44
8	7	RL	0.5	3	49.9433	38.7495	0.264675	17.0926	0.254857	0.743155	0	0	0	0	0	107.048
10	8	Control	0	3	60.2933	47.1191	0	18.5591	0.252026	0.397364	0	0	0	0	0	126.621
11	8	Tween80	0.05	3	57.4088	42.5375	0.227385	16.8012	0.334924	0.443222	0	0	0	0	0	117.753
12	8	Tween80	0.5	3	57.3922	45.8127	0	14.5684	0.187092	0.269507	0	0	0	0	0	118.23
15	8	RL	0.05	3	57.1581	42.3741	0.309629	17.8431	0.247981	0.570983	0	0	0	0	0	118.504
16	8	RL	0.5	3	56.1416	42.8016	0.283127	18.936	0.254734	0.578948	0	0	0	0	0	118.996
18	9	Control	0	3	53.488	42.4209	0	17.4803	0.257081	0.359185	0	0	0	0	0	114.006
19	9	Tween80	0.05	3	55.9259	42.4465	0.321309	16.3013	0.315211	0.392831	0	0	0	0	0	115.703
20	9	Tween80	0.5	3	56.3722	43.6651	0	13.653	0.216838	0.266949	0	0	0	0	0	114.174
23	9	RL	0.05	3	55.5664	41.8141	0	16.622	0.25018	0.467602	0	0	0	0	0	114.72
24	9	RL	0.5	3	57.009	42.1257	0.281796	18.0631	0.277725	0.471507	0	0	0	0	0	118.229
2	9.5	Control	0	3	41.7891	32.497	0	15.3443	0.176341	0.312889	0	0	0	0	0	90.1196
3	9.5	Tween80	0.05	3	49.8999	34.2324	0	15.1156	0.221285	0.329442	0	0	0	0	0	99.7987
4	9.5	Tween80	0.5	3	53.9945	35.1101	0	12.9099	0.177301	0.242725	0	0	0	0	0	102.434
7	9.5	RL	0.05	3	46.1282	35.7988	0	12.6458	0.183964	0.351226	0	0	0	0	0	95.108
8	9.5	RL	0.5	3	44.2285	37.976	0	11.857	0.213624	0.343792	0	0	0	0	0	94.619
10	10	Control	0	3	50.7116	34.3852	0	18.1238	0.215826	0.348812	0	0	0	0	0	103.785
11	10	Tween80	0.05	3	58.606	30.3035	0.223835	17.7427	0.257587	0.350489	0	0	0	0	0	107.484
12	10	Tween80	0.5	3	63.9008	30.174	0.224111	15.7748	0.213438	0.272183	0	0	0	0	0	110.559
15	10	RL	0.05	3	51.2183	41.4034	0	6.59085	0.209655	0.19707	0	0	0	0	0	99.6193
16	10	RL	0.5	3	46.7548	37.9401	0	4.46027	0.26806	0.191004	0	0	0	0	0	89.6143
18	12	Control	0	3	58.1515	27.8355	0	19.0403	0.240892	0.338913	0	0	0	0	0	105.607
19	12	Tween80	0.05	3	63.3326	18.03	0.271909	24.5933	0.379137	0.393259	0	0	0	0	0	107
20	12	Tween80	0.5	3	59.8763	14.8859	0	31.796	0.247152	0.367501	0	0	0	0	0	107.173
23	12	RL	0.05	3	53.0038	35.3669	0.493192	3.2624	1.18857	0	0	0	0	0	0	93.3149
24	12	RL	0.5	3	56.9046	39.1721	0	3.50579	0.398342	0	0	0	0	0	0	99.9808
2	11	Control	0	3	65.2732	45.2051	0.238955	23.4273	0.313682	0.402705	0	0.225491	0	0	0	135.086
3	11	Tween80	0.05	3	75.3441	28.2305	0.272466	33.3675	0.352608	0.508888	0	0.137901	0	0	0	138.214
4	11	Tween80	0.5	3	70.8686	23.335	0.258232	33.5065	0.313783	0.401261	0	0	0	0	0	128.683
7	11	RL	0.05	3	69.5412	58.5246	0.291768	4.99805	0.595178	0	0	0	0	0	0	133.951
8	11	RL	0.5	3	66.1046	52.7705	0	4.71228	0.434691	0	0	0	0	0	0	124.022
10	14	Control	0	3	50.4575	27.1253	0.2727	19.4898	0.389866	0.337909	0	0	0	0	0	98.0731
11	14	Tween80	0.05	3	53.1476	15.5523	1.18272	25.2864	1.59783	0.361974	0	0	0	0	0	97.1289
12	14	Tween80	0.5	3	52.9662	13.6634	0.301692	28.3353	0.350601	0.381025	0	0	0	0	0	95.9983
15	14	RL	0.05	3	45.9996	42.1465	0.997576	4.27439	1.64705	0	0	0	0	0	0	95.0651
16	14	RL	0.5	3	47.2938	38.2216	0	2.56239	0.410391	0	0	0	0	0	0	88.4882
18	16	Control	0	3	49.0932	27.2846	1.02604	20.9081	1.41664	0.353701	0	0	0	0	0	100.082
19	16	Tween80	0.05	3	53.7912	15.3729	1.16208	25.8177	1.46003	0.342153	0	0	0	0	0	97.946
20	16	Tween80	0.5	3	55.2535	13.6317	0.39317	26.9778	0.601631	0.384166	0	0	0	0	0	97.2419
23	16	RL	0.05	3	45.226	36.7298	0.919118	3.73714	1.51195	0	0	0	0	0	0	88.124
24	16	RL	0.5	3	50.7724	21.5635	0.227809	2.35712	0.437881	0	0	0	0	0	0	75.3587

## Sheet: Together_mmol
Timepoint	Emulsifier	EM_Conc	SHIME	acetic acid	propionic acid	isobutyric acid	butyric acid	isovaleric acid	valeric acid	isocaproic acid	caproic acid	ISTD	heptanoic acid	Octanoic acid	Sum
2	Control	0	2	93.9619	13.1242	0	0.685529	0.175582	0	0	0	0	0	0	107.947
2	P80	0.05	2	108.617	16.8193	1.24452	1.61216	1.73855	0	0.297085	0	0	0	0	130.329
2	P80	0.5	2	110.311	16.7693	0.2462	0.813717	0.261859	0	0	0	0	0	0	128.402
2	RL	0.05	2	106.791	15.7361	0	0.883714	0.187895	0	0	0	0	0	0	123.599
2	RL	0.5	2	100.93	12.7342	0	0.637851	0.209788	0	0	0	0	0	0	114.511
3	Control	0	2	84.1955	13.8031	0.225742	8.18289	0.261211	0	0	0	0	0	0	106.668
3	P80	0.05	2	75.7769	12.5714	1.2213	4.61319	1.65881	0	0.140581	0	0	0	0	95.9822
3	P80	0.5	2	96.2667	16.5726	0.269149	7.23061	0.34327	0	0	0	0	0	0	120.682
3	RL	0.05	2	87.9641	13.7291	0.254075	11.8325	0.287956	0	0	0	0	0	0	114.068
3	RL	0.5	2	48.5285	9.29837	0	4.25468	0	0	0	0	0	0	0	62.0816
4	Control	0	2	61.2536	14.7262	1.36605	19.6832	2.0019	0.190403	0	0	0	0	0	99.2214
4	P80	0.05	2	59.4228	18.2989	0.540814	15.0148	0.995833	0.225846	0	0	0	0	0	94.499
4	P80	0.5	2	60.5378	16.6129	0.479421	14.972	0.974216	0.183335	0	0	0	0	0	93.7598
4	RL	0.05	2	56.8786	13.6966	0.727914	13.986	1.321	0.168477	0	0	0	0	0	86.7786
4	RL	0.5	2	12.1849	1.63282	0	3.33575	0	0	0	0	0	0	0	17.1534
5	Control	0	2	59.3923	18.5527	1.47257	19.9092	2.03375	0.193037	0	0	0	0	0	101.554
5	P80	0.05	2	54.199	21.2813	1.31402	17.3015	1.9213	0.266476	0	0	0	0	0	96.2836
5	P80	0.5	2	62.1242	20.8728	0.99455	14.7485	1.75658	0.217989	0	0	0	0	0	100.715
5	RL	0.05	2	58.6714	19.1104	1.49242	19.561	2.06468	0.242335	0	0	0	0	0	101.142
5	RL	0.5	2	24.4303	2.51399	0	9.74659	0	0	0	0	0	0	0	36.6908
6	Control	0	2	54.5877	15.0133	1.42644	21.2614	2.08835	0.209434	0	0.247013	0	0	0	94.8336
6	P80	0.05	2	56.8206	21.1549	1.39519	26.0773	2.08375	0.365315	0	0.176405	0	0	0	108.073
6	P80	0.5	2	63.6676	20.1172	1.46866	19.9077	2.14547	0.290053	0	0.124439	0	0	0	107.721
6	RL	0.05	2	55.193	19.4461	1.46618	21.4581	2.06855	0.293978	0	0	0	0	0	99.926
6	RL	0.5	2	36.1038	12.8579	0	3.00107	0.213947	0	0	0	0	0	0	52.1767
8	Control	0	2	59.5533	15.2979	1.42408	22.814	2.01786	0.209913	0	0	0	0	0	101.317
8	P80	0.05	2	55.0236	18.8924	1.42034	27.259	2.24971	0.342785	0	0	0	0	0	105.188
8	P80	0.5	2	62.5319	17.73	1.34299	24.0468	2.10709	0.295147	0	0	0	0	0	108.054
8	RL	0.05	2	53.6715	19.6215	1.48345	23.3117	2.26269	0.279767	0	0	0	0	0	100.631
8	RL	0.5	2	56.224	21.6556	0.281909	2.69015	0.534686	0	0	0	0	0	0	81.3864
9	Control	0	2	64.6606	16.1863	1.49202	24.9474	2.09841	0.221027	0	0	0	0	0	109.606
9	P80	0.05	2	59.0197	18.6813	1.41826	24.0332	2.05474	0.296158	0	0	0	0	0	105.503
9	P80	0.5	2	57.6318	16.7494	1.32011	24.468	2.01014	0.281709	0	0	0	0	0	102.461
9	RL	0.05	2	50.6914	20.9074	1.52527	21.6332	2.33259	0.290893	0	0	0	0	0	97.3806
9	RL	0.5	2	45.262	16.3525	1.08225	14.4484	1.63802	0.17998	0	0	0	0	0	78.9631
10	Control	0	2	58.4167	15.3273	1.44719	24.8067	2.12497	0.261376	0	0.152721	0	0	0	102.537
10	P80	0.05	2	67.2884	18.527	0.908186	15.2348	1.34099	0.271711	0	0	0	0	0	103.571
10	P80	0.5	2	61.439	17.2414	1.10139	16.3147	1.74541	0.255092	0	0	0	0	0	98.0969
10	RL	0.05	2	56.3374	20.6267	1.32782	21.8925	2.12093	0.286147	0	0	0	0	0	102.591
10	RL	0.5	2	60.5653	22.0873	1.3755	20.2245	2.03727	0.271705	0	0	0	0	0	106.562
11	Control	0	2	61.4443	15.2357	1.42081	22.747	2.14734	0.227215	0	0	0	0	0	103.222
11	P80	0.05	2	17.3001	4.85736	0.450007	4.26487	0.627984	0	0	0	0	0	0	27.5003
11	P80	0.5	2	67.5046	17.6931	1.38923	14.9152	2.12505	0.226055	0	0	0	0	0	103.853
11	RL	0.05	2	58.3321	19.0213	1.33868	20.0781	2.1281	0.276375	0	0	0	0	0	101.175
11	RL	0.5	2	65.722	21.3838	1.37262	16.337	2.02948	0.231826	0	0	0	0	0	107.077
11.5	Control	0	2	61.8191	14.1413	1.05474	19.5107	1.65983	0.229806	0	0	0	0	0	98.4154
11.5	P80	0.05	2	41.8074	8.49216	0.456276	5.34557	0.727799	0	0	0	0	0	0	56.8292
11.5	P80	0.5	2	65.1978	15.6895	1.09881	12.9094	1.66078	0.279049	0	0	0	0	0	96.8353
11.5	RL	0.05	2	55.2745	16.5199	0.943775	16.3415	1.52473	0.227633	0	0	0	0	0	90.8321
11.5	RL	0.5	2	62.3103	21.4022	1.03138	12.6649	1.58289	0.220624	0	0	0	0	0	99.2123
12	Control	0	2	54.6923	14.3707	1.19367	18.4906	1.80758	0.217629	0	0	0	0	0	90.7724
12	P80	0.05	2	52.8896	13.2675	1.03	11.0629	1.42295	0.159771	0	0	0	0	0	79.8327
12	P80	0.5	2	52.104	15.67	1.19654	16.8501	1.62842	0.244909	0	0	0	0	0	87.694
12	RL	0.05	2	50.3542	19.8541	1.18735	11.3103	1.93476	0.17199	0	0	0	0	0	84.8127
12	RL	0.5	2	41.2401	17.7051	0.52432	7.02635	0.868508	0.144542	0	0	0	0	0.20959	67.7185
14	Control	0	2	63.8672	15.0087	1.16481	16.5919	1.74526	0.204765	0	0	0	0	0	98.5826
14	P80	0.05	2	62.372	14.7672	1.23474	15.8898	1.76991	0.47193	0	0	0	0	0	96.5055
14	P80	0.5	2	49.6911	15.5162	1.15905	21.6258	1.58831	0.247476	0	0	0	0	0	89.8278
14	RL	0.05	2	40.956	19.6038	1.13472	7.06292	1.76453	0	0	0	0	0	0	70.522
14	RL	0.5	2	54.7854	12.673	0	2.5278	0.267158	0	0	0	0	0	0.186257	70.4396
16	Control	0	2	56.0438	18.6523	1.23959	16.0393	1.80426	0.224124	0	0	0	0	0	94.0033
16	P80	0.05	2	68.1113	11.643	1.23924	14.6692	1.80849	1.44083	0	0	0	0	0	98.9121
16	P80	0.5	2	51.8135	14.6435	1.35821	22.1305	1.8739	0.266038	0	0	0	0	0	92.0856
16	RL	0.05	2	54.1126	21.811	1.23016	8.30283	1.86813	0	0	0	0	0	0	87.3247
16	RL	0.5	2	56.8692	15.0705	0.237443	2.63321	0.248576	0	0	0	0	0	0.189502	75.2484
18	Control	0	2	53.3249	19.5436	1.1795	13.494	1.70407	0.233972	0	0	0	0	0	89.48
18	P80	0.05	2	68.6098	14.3127	1.35876	15.2709	1.75754	1.32524	0	0	0	0	0	102.635
18	P80	0.5	2	50.8504	11.1672	1.25443	19.1498	1.69415	0.220476	0	0	0	0	0	84.3364
18	RL	0.05	2	50.7393	19.0297	1.065	6.21538	1.67877	0	0	0	0	0	0	78.7282
18	RL	0.5	2	52.4035	17.1326	0	2.47456	0.283153	0	0	0	0	0	0	72.2939
2	Control	0	3	67.5268	23.9277	0.411918	28.435	0.393953	1.99994	0	0.134291	0	0	0	122.83
2	P80	0.05	3	68.9047	19.7079	0.235698	15.2554	0.162242	0.46323	0	0	0	0	0	104.729
2	P80	0.5	3	70.9457	24.2224	0.469422	26.2107	0.495564	2.40579	0	0.131143	0	0	0	124.881
2	RL	0.05	3	69.2833	24.581	0.542684	26.1618	0.604998	2.62241	0	0.13382	0	0	0	123.93
2	RL	0.5	3	71.1325	25.3188	0.458943	26.6297	0.55457	2.61901	0	0.129326	0	0	0	126.843
3	Control	0	3	65.6052	24.3729	0.367917	31.6956	0.481648	2.23743	0	0	0	0	0	124.761
3	P80	0.05	3	68.7157	25.2922	0.301907	23.0422	0.347246	0.980149	0	0	0	0	0	118.679
3	P80	0.5	3	13.9425	5.71856	0	4.91125	0.166219	0.369278	0	0	0	0	0	25.1078
3	RL	0.05	3	67.1211	28.6518	0.422675	27.2725	0.508154	2.31487	0	0.13667	0	0	0	126.428
3	RL	0.5	3	61.1736	28.0211	0.489076	27.5409	0.541073	2.26404	0	0	0	0	0	120.03
5	Control	0	3	59.5452	44.9408	0.222035	19.1305	0.307433	0.91976	0	0	0	0	0	125.066
5	P80	0.05	3	60.1169	45.7584	0.261364	14.0973	0.30776	0.514046	0	0	0	0	0	121.056
5	P80	0.5	3	62.6652	48.0254	0.254265	10.2432	0.231279	0.289269	0	0	0	0	0	121.709
5	RL	0.05	3	56.6386	41.3545	0.226757	17.7881	0.290135	0.933798	0	0	0	0	0	117.232
5	RL	0.5	3	55.366	40.8827	0	17.6082	0.290175	0.867704	0	0	0	0	0	115.015
7	Control	0	3	52.3673	43.1022	0	15.7209	0.167822	0.360559	0	0	0	0	0	111.719
7	P80	0.05	3	52.6429	40.1539	0.225994	16.1453	0.253677	0.466927	0	0	0	0	0	109.889
7	P80	0.5	3	55.3806	45.7287	0	13.5832	0.196348	0.286589	0	0	0	0	0	115.175
7	RL	0.05	3	52.3036	40.4405	0	16.8758	0.205931	0.613794	0	0	0	0	0	110.44
7	RL	0.5	3	49.9433	38.7495	0.264675	17.0926	0.254857	0.743155	0	0	0	0	0	107.048
8	Control	0	3	60.2933	47.1191	0	18.5591	0.252026	0.397364	0	0	0	0	0	126.621
8	P80	0.05	3	57.4088	42.5375	0.227385	16.8012	0.334924	0.443222	0	0	0	0	0	117.753
8	P80	0.5	3	57.3922	45.8127	0	14.5684	0.187092	0.269507	0	0	0	0	0	118.23
8	RL	0.05	3	57.1581	42.3741	0.309629	17.8431	0.247981	0.570983	0	0	0	0	0	118.504
8	RL	0.5	3	56.1416	42.8016	0.283127	18.936	0.254734	0.578948	0	0	0	0	0	118.996
9	Control	0	3	53.488	42.4209	0	17.4803	0.257081	0.359185	0	0	0	0	0	114.006
9	P80	0.05	3	55.9259	42.4465	0.321309	16.3013	0.315211	0.392831	0	0	0	0	0	115.703
9	P80	0.5	3	56.3722	43.6651	0	13.653	0.216838	0.266949	0	0	0	0	0	114.174
9	RL	0.05	3	55.5664	41.8141	0	16.622	0.25018	0.467602	0	0	0	0	0	114.72
9	RL	0.5	3	57.009	42.1257	0.281796	18.0631	0.277725	0.471507	0	0	0	0	0	118.229
9.5	Control	0	3	41.7891	32.497	0	15.3443	0.176341	0.312889	0	0	0	0	0	90.1196
9.5	P80	0.05	3	49.8999	34.2324	0	15.1156	0.221285	0.329442	0	0	0	0	0	99.7987
9.5	P80	0.5	3	53.9945	35.1101	0	12.9099	0.177301	0.242725	0	0	0	0	0	102.434
9.5	RL	0.05	3	46.1282	35.7988	0	12.6458	0.183964	0.351226	0	0	0	0	0	95.108
9.5	RL	0.5	3	44.2285	37.976	0	11.857	0.213624	0.343792	0	0	0	0	0	94.619
10	Control	0	3	50.7116	34.3852	0	18.1238	0.215826	0.348812	0	0	0	0	0	103.785
10	P80	0.05	3	58.606	30.3035	0.223835	17.7427	0.257587	0.350489	0	0	0	0	0	107.484
10	P80	0.5	3	63.9008	30.174	0.224111	15.7748	0.213438	0.272183	0	0	0	0	0	110.559
10	RL	0.05	3	51.2183	41.4034	0	6.59085	0.209655	0.19707	0	0	0	0	0	99.6193
10	RL	0.5	3	46.7548	37.9401	0	4.46027	0.26806	0.191004	0	0	0	0	0	89.6143
12	Control	0	3	58.1515	27.8355	0	19.0403	0.240892	0.338913	0	0	0	0	0	105.607
12	P80	0.05	3	63.3326	18.03	0.271909	24.5933	0.379137	0.393259	0	0	0	0	0	107
12	P80	0.5	3	59.8763	14.8859	0	31.796	0.247152	0.367501	0	0	0	0	0	107.173
12	RL	0.05	3	53.0038	35.3669	0.493192	3.2624	1.18857	0	0	0	0	0	0	93.3149
12	RL	0.5	3	56.9046	39.1721	0	3.50579	0.398342	0	0	0	0	0	0	99.9808
11	Control	0	3	65.2732	45.2051	0.238955	23.4273	0.313682	0.402705	0	0.225491	0	0	0	135.086
11	P80	0.05	3	75.3441	28.2305	0.272466	33.3675	0.352608	0.508888	0	0.137901	0	0	0	138.214
11	P80	0.5	3	70.8686	23.335	0.258232	33.5065	0.313783	0.401261	0	0	0	0	0	128.683
11	RL	0.05	3	69.5412	58.5246	0.291768	4.99805	0.595178	0	0	0	0	0	0	133.951
11	RL	0.5	3	66.1046	52.7705	0	4.71228	0.434691	0	0	0	0	0	0	124.022
14	Control	0	3	50.4575	27.1253	0.2727	19.4898	0.389866	0.337909	0	0	0	0	0	98.0731
14	P80	0.05	3	53.1476	15.5523	1.18272	25.2864	1.59783	0.361974	0	0	0	0	0	97.1289
14	P80	0.5	3	52.9662	13.6634	0.301692	28.3353	0.350601	0.381025	0	0	0	0	0	95.9983
14	RL	0.05	3	45.9996	42.1465	0.997576	4.27439	1.64705	0	0	0	0	0	0	95.0651
14	RL	0.5	3	47.2938	38.2216	0	2.56239	0.410391	0	0	0	0	0	0	88.4882
16	Control	0	3	49.0932	27.2846	1.02604	20.9081	1.41664	0.353701	0	0	0	0	0	100.082
16	P80	0.05	3	53.7912	15.3729	1.16208	25.8177	1.46003	0.342153	0	0	0	0	0	97.946
16	P80	0.5	3	55.2535	13.6317	0.39317	26.9778	0.601631	0.384166	0	0	0	0	0	97.2419
16	RL	0.05	3	45.226	36.7298	0.919118	3.73714	1.51195	0	0	0	0	0	0	88.124
16	RL	0.5	3	50.7724	21.5635	0.227809	2.35712	0.437881	0	0	0	0	0	0	75.3587
