# Supplementary material for: Differential impact of rhamnolipids and TWEEN80 on the composition and functionality of the gut microbiota in the SHIME system.
Source: Research Square preprint supplement (doi:10.21203/rs.3.rs-1340099/v1), 2022-02-11
Supplement: Supplementary file 5 [file d15c88098b988e671c2d42a1.xlsx]

## Sheet: Sheet1
Samplenr_Original	Emulsifier	EM_Conc	Treatment	Timepoint (Day)	SHIME	L-histidine	2,6-diaminopimelic_acid	L-arginine	D-alanine	L-asparagine	L-homoserine	D-aspartic_acid	D-glutaminic_acid	L-glutamine	trans-4-hydroxy-L-proline	2-aminoisobutyric_acid	D-alpha-aminobutyric_acid	rac-glycerol 1-phosphate	tyramine	D-valine-d8	N-acetylglucosamine	uracil	O-acetylcarnitine	hypoxanthine	L-pyroglutamic_acid	pyrimidine	thymine	cyclohexylamine	furfural	N-acetyl-L-methionine	tryptamine	2,6-dimethylpyrazine	2,5-dimethylpyrazine	3-indoleacetic_acid	benzaldehyde	indane	ethylbenzene	o-xylene	p-xylene	4-hydroxy-2-nonenal	cinnamaldehyde	glycoursodeoxycholic_acid	phenylacetaldehyde	beta-pinene	2-ethyl-1-hexene	trans-2-octenal	styrene	L-carnosine	D-galacturonic_acid
2	Control	0	Control - 0	2	2	0.0138714	0.00513751	0.0133109	1.32912	0.0035765	0.252051	0.00784197	1.21971	0.0135636	0.322617	0.664651	0.664191	0	1.05334	1	0.0666692	0.963468	0	4.57859	11.9754	0	1.17719	0.00184319	0.00112301	0.177119	0.201725	0.00178084	0.00178084	0.00156826	0.00206385	0.00797455	0.00409458	0	0.00545724	0.0271657	0.000620159	0	1.45449	0.00321023	0.00209149	0.0135326	0	0	0.284462
3	P80	0.05	P80 - 0,05	2	2	0	0.00475249	0.015192	0.207014	0.00546426	0.0146801	0.0129314	0.279381	0.00773742	0.0442823	0.693783	0.682491	0	0.970257	1	0.00256546	0.173139	0	0.919446	9.29305	0	0.100783	0.00150203	0.00102062	0.0275579	0.136987	0.000925388	0.000925388	0.00190932	0.00183597	0.00546705	0.00300551	0	0.00404171	0.0231977	0.00521121	0	1.39574	0.00139306	0.00202458	0.0123173	0.00938973	0.000453606	0.36945
4	P80	0.5	P80 - 0,5	2	2	0.00152799	0.00454756	0.025388	1.00148	0.00383749	0.0455585	0.0201121	0.83919	0.0120272	0.420902	0.499597	0.499597	0	0.984259	1	0.00603096	0.567994	0	1.23555	12.6019	0	0.733605	0.00198951	0.000578874	0.207103	0.170535	0.00151702	0.00142766	0.00255971	0.00204837	0.00825759	0.00421421	0.00181259	0.00534114	0.0306122	0.000804046	0	1.34549	0.00235822	0.00288918	0.0129769	0.00125301	0.00109078	0.464677
7	RL	0.05	RL - 0,05	2	2	0.00200062	0.00284427	0.0112281	1.10323	0.00665817	0.0442764	0.0179381	0.930347	0.0109205	0.341681	0.580171	0.580171	0	1.17187	1	0.0546582	0.775688	0	1.87304	12.7046	0	0.880915	0.00184723	0.00090014	0.141766	0.170831	0.000969267	0.000969267	0.00157544	0.00227871	0.00790698	0.00430939	8.78121e-05	0.00605849	0.0270192	0.000917627	0	1.66148	0.00274643	0.00348941	0.014354	0.00132711	0	0.0395525
8	RL	0.5	RL - 0,5	2	2	0.00187183	0.00256794	0.00404449	1.24105	0.00582881	0.205093	0.0111836	1.08518	0.0124344	0.333089	0.558389	0.550877	0	1.07086	1	0.045709	1.1458	0	3.59789	12.2062	0	1.19172	0.00256527	0.000967179	0.135658	0.126483	0.00303111	0.00299102	0.00132363	0.0020203	0.00755065	0.00357618	7.25093e-05	0.00476618	0.0281985	0.000877378	0	1.52848	0.00279361	0.00310736	0.0160561	0.00106291	0	0.468078
9	Control	0	Control - 0	11	2	0.00242543	0.0302384	0.0661617	0.250135	0.00239644	0.0180308	0.0103434	0.0873673	0.0263694	0.011956	0.61478	0.606473	0.000333944	0.291	1	0.000724869	0.533651	0	0.599801	0.0534937	0	0.0943599	0.00105297	0.00057599	0.0150162	0.00837406	0.000643645	0.000626877	0.00221144	0.00212573	0.00501598	0.00340735	7.05172e-05	0.0048233	0.0312293	0.000866971	0	0.41696	0.00268714	0.0019767	0.00922021	0.00130898	0.000604317	0.347856
10	P80	0.05	P80 - 0,05	11	2	0.000490269	0.00670846	0.0145615	0.0295123	0.00010348	0.00327908	0.00191734	0.0496455	0.00458872	0.00283997	0.0406296	0.0406296	0.00111628	0.0672364	1	0.0047561	0.132364	0	0.203975	0.0494142	0	0.0235083	0.000346155	0.000737922	0.00252762	0.00177673	0	0	0.00123236	0.00061961	0.00379068	0.00178864	4.7551e-05	0.00233787	0.00806289	0.000494163	0	0.0978259	0.00124532	0.00146736	0.0100326	0.000692503	0.00059683	0.244863
11	P80	0.5	P80 - 0,5	11	2	0.00279652	0.0371688	0.0818015	0.655944	0.00156504	0.0249001	0.00953996	0.0804396	0.0383112	0.0151252	0.922038	0.934572	0	0.272419	1	0.000967745	0.156356	0	0.508542	0.0499468	0	0.0222163	0.00135998	0.000799129	0.0139775	0.00885818	0	0.000570967	0.00263956	0.000491301	0.00510516	0.00284091	0	0.00391841	0.027628	0.000748428	0	0.400628	0.00223755	0.00199387	0.0085866	0.0009384	0.000801994	0.242437
14	RL	0.05	RL - 0,05	11	2	0.0028666	0.0380782	0.0908794	0.155168	0.00273254	0.0264265	0.0109782	0.0850632	0.037667	0.0108741	0.85626	0.871322	0	0.273679	1	0.00139236	0.480734	0	0.659895	0.0449112	0	0.0549132	0.00114996	0.00092339	0.0141773	0.00822422	0	0	0.00276289	0.00177429	0.00525403	0.00373461	0	0.00496431	0.028956	0.00107953	0	0.399901	0.00250263	0.00217715	0.0102498	0.0014925	0	0.327125
15	RL	0.5	RL - 0,5	11	2	0.00151014	0.0303906	0.0471884	0.451532	0.00101043	0.0162165	0.00790145	0.0578213	0.027489	0.00948325	0.901548	0.915761	0	0.300319	1	0.000898905	0.476326	0	0.482673	0.0379954	0	0.058487	0.00112719	0.000755786	0.0194415	0.00803968	0.000644742	0.000644742	0.00213393	0.00187899	0.00514627	0.0036694	0	0.00510847	0.0265057	0.00106426	0	0.445697	0.00173799	0.00199651	0.0083003	0.00155058	0	0.185306
16	Control	0	Control - 0	12	2	0.00336077	0.0211389	0.0660817	0.373236	0.00217825	0.0370899	0.0212674	0.133919	0.0335896	0.0169336	1.04142	1.05385	0	0.278191	1	0.00199778	0.450849	0	0.780792	0.0682405	0	0.0949446	0.000848205	0.00166958	0.0147144	0.00620139	0	0	0.00194604	0.00261755	0.00488909	0.00388676	7.55962e-05	0.00522315	0.0207278	0.000889526	0	0.418045	0.00234164	0.00118686	0.00879219	0.00181524	0	0.0431988
17	P80	0.05	P80 - 0,05	12	2	0.000569121	0.0116849	0.0285873	0.15299	0	0.00820412	0.00531424	0.0322042	0.00947345	0.0135996	0.252267	0.252477	0.00134891	0.253537	1	0.0110995	0.113751	0	0.204744	0.0285058	0	0.0223064	0.000540802	0.000654241	0.00503159	0.00439415	0	0	0.00128217	0.00113466	0.0042273	0.00149797	0.00116922	0.00228288	0.0143672	0.000672724	0	0.38479	0.00168155	0.000741426	0.00735129	0.00105356	0.000672312	0.316135
18	P80	0.5	P80 - 0,5	12	2	0.00364864	0.0246564	0.0170814	0.222507	0.00211456	0.0377286	0.0206808	0.0945913	0.0369511	0.0141788	0.329149	0.325465	0.00112377	0.29197	1	0.00217166	0.119276	0	1.02967	0.0348186	0	0.0145599	0.000992961	0.000801921	0.00517715	0.00525356	0.000652422	0.000652422	0.000333495	0.00194554	0.00487737	0.00117974	8.74252e-05	0.00220813	0.00831702	0.00180933	0	0.432606	0.00229054	0.00115653	0.0101994	0.00408384	0.000745624	0.247279
21	RL	0.05	RL - 0,05	12	2	0.00444797	0.0489153	0.141408	0.451907	0.00376807	0.0314296	0.0171499	0.0622441	0.0584665	0.0154452	1.59727	1.62079	0	0.371055	1	0.00232479	0.46029	0	0.432788	0.0209013	0	0.265022	0.000862007	0.000717045	0.0364852	0.00831238	0.000850157	0.000857129	0.00124298	0.00267227	0.00608246	0.00828224	0	0.0103932	0.0305372	0.00134392	0	0.55195	0.0227846	0.00127605	0.0155646	0.00214469	0.00159838	0.309129
22	RL	0.5	RL - 0,5	12	2	0.00756294	0.0327854	0.104481	1.4721	0.00329479	0.201715	0.0132483	0.0531074	0.0552163	0.00997447	1.2558	1.2558	0	0.6891	1	0.00589768	1.49698	0	0.676057	1.16837	0	0.690022	0.00144164	0.00096153	0.103619	0.0118948	0.000865375	0.000884377	0	0.000658587	0.00477216	0.030294	0.000163621	0.0329987	0.0314444	0.000600578	0.000729929	0.976907	0.136803	0.00162796	0.0190767	0.000737782	0	0.291744
23	Control	0	Control - 0	14	2	0.00149711	0.020707	0.0451787	0.187283	0.0011856	0.0181379	0.0119902	0.103149	0.020574	0.0114673	0.747934	0.741348	0.000568706	0.223455	1	0.00132275	0.387979	0	0.48209	0.0493013	0	0.0606698	0.000667912	0.000934656	0.00932413	0.00631173	0.000588545	0.000588545	0.00147126	0.00201298	0.00474729	0.0033723	0.00133499	0.00457747	0.0238335	0.00105133	0	0.32567	0.00204868	0.00119018	0.00978844	0.00187593	0	0.13407
24	P80	0.05	P80 - 0,05	14	2	0.00115271	0.0166411	0.0473904	0.227431	0	0.0129828	0.00785651	0.0516073	0.0167295	0.0124131	0.37489	0.370866	0	0.204434	1	0.000348145	0.229118	0	0.247763	0.017898	0	0.0199449	0.000698323	0.000515783	0.00580096	0.00524004	0.000667112	0.000667112	0.000870619	0.00176685	0.00342868	0.00168864	0.0011985	0.00270932	0.0158846	0.0014786	0	0.306175	0.0015993	0.000944244	0.00707639	0.00228574	0.000569632	0.15395
25	P80	0.5	P80 - 0,5	14	2	0.00184546	0.0279991	0.0263341	0.134228	0	0.0207664	0.00876855	0.0785977	0.0294608	0.00710945	0.350884	0.350884	0.00147903	0.193521	1	0.00143476	0.0945606	0	0.508385	0.0268827	0	0.0131037	0.000856686	0.000665207	0.00632241	0.00467847	0.000546834	0.000546834	0.000307507	0.00158036	0.00358964	0.00108675	4.03083e-05	0.00179993	0.00763337	0.00134241	0.000720304	0.281451	0.00153716	0.00155448	0.0069476	0.00268272	0	0.23715
28	RL	0.05	RL - 0,05	14	2	0.000912076	0.0232587	0.14947	0.508481	0.00179856	0.0179468	0.0050223	0.0313124	0.0201489	0.0155635	0.662133	0.656156	0.000685099	0.188247	1	0.0143711	0.514784	0	0.216171	0.0262529	0	0.414695	0.000608139	0.000458792	0.028712	0.00480264	0	0	0.00141975	0.00118236	0.00457335	0.00654646	0.00117762	0.00754216	0.0193223	0.000798786	0	0.286799	0.0190726	0.000681151	0.0111432	0.000951495	0	0.282452
29	RL	0.5	RL - 0,5	14	2	0.00368126	0.0350057	0.190556	1.56051	0.00470395	0.387897	0.0127163	0.0691776	0.0784055	0.0102102	0.27553	0.27553	0	0.514524	1	0.0263251	1.23225	0	0.361948	1.62464	0	0.715879	0.00125167	0.00061065	0.151247	0.0101112	0.000698407	0.000763407	0.000794353	0.000241383	0.0043662	0.0312093	0	0.0332279	0.0321641	0.000979112	0	0.763491	0.140233	0.0010999	0.0197137	0	0	0.254526
30	Control	0	Control - 0	18	2	0.00152736	0.0112557	0.0192725	0.198877	0.000678858	0.018773	0.00677054	0.0765133	0.0161232	0.0103105	0.743476	0.73123	0.000783665	0.200348	1	0.00152915	0.66649	0	0.686197	0.0412931	0	0.103936	0.00103456	0.000326836	0.0111272	0.00717304	0.000623742	0.000604938	0.00143388	0.000426599	0.00393836	0.00183235	2.20119e-05	0.00251479	0.019903	0.000485544	0	0.2793	0.00219221	0.0015708	0.00735461	0.000498685	0	0.209637
31	P80	0.05	P80 - 0,05	18	2	0.00130862	0.0180139	0.0117077	0.217312	0.000813522	0.0168947	0.0135393	0.117403	0.0203309	0.0108095	0.759396	0.759396	0.000922499	0.197366	1	0.00204263	0.508631	0	0.621381	0.0635162	0	0.259693	0.000765757	0.000898212	0.0113173	0.00518552	0.000707265	0.000623103	0.000475183	0.00183529	0.00394706	0.00152741	0.00100021	0.00244577	0.0156393	0.00114866	0	0.289121	0.00198474	0.000886622	0.00701655	0.00183695	0.00091047	0.0116822
32	P80	0.5	P80 - 0,5	18	2	0.00211589	0.0229612	0.0102324	0.136854	0.00102156	0.0219464	0.0124869	0.111841	0.0271427	0.00695582	0.561766	0.561766	0.000783323	0.203931	1	0.00227264	0.25292	0	0.498834	0.0794475	0	0.0423648	0.000693448	0.000926745	0.0136644	0.00425549	0	0	0.000135119	0.00151953	0.00429474	0	0	0.00235068	0.0118766	0.00100392	0	0.316496	0.00184161	0.000404978	0.00788568	0.00222612	0.00105123	0.256534
35	RL	0.05	RL - 0,05	18	2	0.00159108	0.0276533	0.251816	0.624849	0.00282583	0.0187615	0.00620919	0.0313201	0.0288898	0.0148395	0.615055	0.615055	0	0.211288	1	0.0125513	0.500115	0	0.301949	0.0368279	0	0.521162	0.000626849	0.00194279	0.0432995	0.00457596	0.000735844	0.000719512	0.000907641	0.00110921	0.004477	0.00697775	0.00133432	0.00804746	0.0240258	0.000841715	0	0.327134	0.0213794	0.000704098	0.00852144	0.00087626	0	0.312256
36	RL	0.5	RL - 0,5	18	2	0.0047411	0.0471096	0.156566	1.06486	0.00427497	0.0541597	0.0155139	0.0633962	0.071196	0.0145132	0.291417	0.286178	0.00113769	0.222172	1	0.00595196	0.708791	0	0.427275	0.961709	0	0.549619	0.00131407	0.000785345	0.108164	0.00735646	0.000778557	0.000790991	0.00235074	0.000842026	0.00538374	0.0378401	5.93137e-05	0.0400552	0.0299621	0.000145983	0.00850573	0.303988	0.173604	0.00148349	0.019443	0.00116368	0.000602385	0.191693
37	Fecal sample	0	Fecal sample - 0	1	3	0.00160591	0.000514607	0.0568078	0.13354	0.00913152	0.0931786	0.0358606	0.531832	0.0487369	0.00374546	0.0175524	0.0179182	0.00343936	0.00725911	1	0.0184251	0.500283	0	3.00877	0.0777693	0	0.186382	0.021057	0.000366221	0.00182549	0.000357776	0	0	0.0034316	0.000616764	0.00367486	0.00241662	0	0.00275976	0.00193529	0.0050276	0	0.0102152	0.00112778	0.00205706	0.00599471	0.00925488	0	0.182482
38	Control	0	Control - 0	2	3	0.00118918	0.0106725	0.00990971	0.279231	0.0130098	0.027679	0.011547	0.150227	0.0213667	0.0213387	0.624905	0.624905	0	0.683107	1	0.00738371	0.23672	0	2.64977	0.0906477	0	0.0307533	0.00247795	0.00119692	0.0166982	0.00896675	0.000879712	0.000879712	0.00156883	0.000637859	0.00671865	0.0036792	0.00125143	0.00573562	0.0315665	0.010097	0	0.995811	0.00865519	0.00149435	0.0144521	0.0199813	0.00129232	0.367101
39	P80	0.05	P80 - 0,05	2	3	0.0042612	0.00645775	0.0114168	0.156124	0.00365445	0.034151	0.007001	0.0854673	0.0121488	0.0231295	0.250995	0.250995	0	0.548727	1	0.00266982	0.211851	0	2.41614	0.139194	0	0.0878006	0.00266585	0.00152139	0.019696	0.00665832	0.000858052	0.000858052	0.000418751	0.00311994	0.00657469	0.00341996	0.000150635	0.00469445	0.0253954	0.0034111	0	0.8043	0.00886028	0.00234508	0.00994357	0.00702358	0	0.477166
40	P80	0.5	P80 - 0,5	2	3	0.00106935	0.0180002	0.0159864	0.128002	0.0102745	0.0172723	0.0100704	0.112107	0.0191111	0.014295	0.517606	0.512415	0	0.650617	1	0.00546053	0.300172	0	2.52287	0.171499	0	0.0331523	0.00326364	0.000776887	0.0159576	0.00952486	0.0007404	0.000784272	0.0013086	0.000586669	0.00598178	0.00325542	8.53432e-05	0.0043326	0.0278716	0.00792347	0	0.916685	0.00706848	0.00238526	0.008682	0.015176	0.00120596	0.491834
43	RL	0.05	RL - 0,05	2	3	0.0012667	0.0124294	0.0161028	0.156498	0.0126956	0.0249925	0.0128527	0.153106	0.0178128	0.0149835	0.445697	0.445697	0	0.569412	1	0.00482323	0.205284	0	1.60393	0.162135	0	0.0257009	0.0023315	0.000935606	0.0182318	0.0100558	0.000966336	0.000949109	0.00265154	0.000728153	0.00596285	0.0028523	0.00138135	0.00414091	0.0196419	0.0102777	0	0.821564	0.00928215	0.00158703	0.0126408	0.019019	0.00214417	0.327571
44	RL	0.5	RL - 0,5	2	3	0.00124595	0.0125426	0.0330437	0.161834	0.0110594	0.0261745	0.0163011	0.145835	0.0223207	0.012876	0.422451	0.422451	0	0.681068	1	0.00439631	0.230474	0	2.32798	0.123444	0	0.0268817	0.00377162	0.00120328	0.0113488	0.00974929	0.000784603	0.000784603	0.00206367	0.000635187	0.00631948	0.00333306	0	0.00443642	0.0224144	0.0104254	0	0.950063	0.00986436	0.00237227	0.0105385	0.0173375	0.00143147	0.172884
45	Control	0	Control - 0	9	3	0.00299869	0.0366019	0.0958467	0.191421	0.0023418	0.0391169	0.0132731	0.172378	0.0533259	0.0151182	0.623574	0.623574	0	0.229802	1	0.00231334	0.64805	0	0.851901	0.038553	0	0.458037	0.00129316	0.00127901	0.0263643	0.00869763	0	0	0.00347944	0.00175512	0.00572959	0.00400962	9.42685e-05	0.00534667	0.0261798	0.00146097	0	0.313435	0.00282879	0.00165857	0.0107745	0.00276516	0.000956718	0.0289979
46	P80	0.05	P80 - 0,05	9	3	0.00508533	0.0204873	0.0727262	0.215442	0.000869728	0.0387971	0.0117203	0.145413	0.044051	0.0127749	0.618531	0.618531	0	0.219832	1	0.00218203	0.515579	0	0.904542	0.0340661	0	0.272787	0.00165788	0.000924359	0.0354681	0.00904717	0	0	0.00331573	0.00158956	0.00578128	0.00429	4.83698e-05	0.00564067	0.0233931	0.00122467	0	0.311008	0.00209776	0.00260273	0.0119566	0.00203008	0.00113696	0.157924
47	P80	0.5	P80 - 0,5	9	3	0.0388253	0.0441025	0.100625	0.237165	0.00186533	0.0275041	0.0107652	0.133469	0.0553767	0.0141476	0.639039	0.639039	0	0.21702	1	0.00277287	0.249454	0.00106775	0.676531	0.0457483	0	0.0487421	0.00122548	0.000709453	0.0340435	0.00797104	0.000779839	0.00077167	0.0027719	0.00195866	0.00555919	0.00388359	0.00116654	0.00500729	0.0246161	0.00143208	0	0.30132	0.00231783	0.00103914	0.0112643	0.00288143	0.00101223	0.312213
50	RL	0.05	RL - 0,05	9	3	0.00193565	0.0240864	0.0532715	0.187714	0.0019573	0.027733	0.009231	0.129212	0.0349376	0.0123164	0.533352	0.525914	0	0.249643	1	0.00143746	0.862847	0.00104797	0.720112	0.0354804	0	0.603472	0.0011035	0.00143561	0.0375982	0.00875067	0.000630316	0.000672358	0.00224383	0.00120059	0.0059808	0.00375407	0.000105577	0.00505497	0.0247013	0.00152717	0	0.350698	0.00238086	0.00235735	0.00839811	0.0023012	0.000736435	0.298075
51	RL	0.5	RL - 0,5	9	3	0.0197811	0.0195037	0.0567242	0.199648	0.00109104	0.0295977	0.00916229	0.171593	0.0311986	0.0161254	0.659039	0.659039	0	0.241716	1	0.00397418	0.756827	0	0.386526	0.0784574	0	0.601724	0	0.000866593	0.0358509	0.00780663	0.000989278	0.000974725	0.00253423	0.00134697	0.00583563	0.0035321	0.00152443	0.00514407	0.0237045	0.00160039	0	0.371481	0.00247142	0.000933684	0.00933772	0.00221356	0.00111414	0.395579
52	Control	0	Control - 0	10	3	0.00326291	0.0377109	0.111816	0.265903	0.00218169	0.0553113	0.0184034	0.171877	0.0662925	0.0130074	0.553147	0.553147	0	0.278627	1	0.00195611	0.804765	0.00117495	0.949709	0.0398387	0	0.37287	0.00140204	0.0008157	0.0214934	0.0119131	0.000627243	0.000627243	0.00295339	0.000392674	0.00490433	0.00299186	0	0.00402083	0.0254504	0.000925713	0	0.403786	0.00234218	0.00218385	0.00773268	0.00122238	0.000959788	0.172555
53	P80	0.05	P80 - 0,05	10	3	0.00447888	0.0209203	0.108293	0.258927	0.00828849	0.0860935	0.0313043	0.271169	0.0698802	0.0186068	0.560967	0.560967	0	0.270239	1	0.00179588	0.357286	0	0.970696	0.06406	0	0.0645522	0.00104278	0.00109802	0.0361988	0.00995258	0	0	0.00051073	0.00160572	0.00632154	0.00250453	0	0.00371672	0.0162327	0.00176737	0	0.401472	0.00195012	0.000952937	0.0107973	0.00330583	0	0.39523
54	P80	0.5	P80 - 0,5	10	3	0.0024903	0.0261077	0.024987	0.205827	0.00205714	0.0499827	0.0196382	0.157382	0.045781	0.0109338	0.541572	0.548406	0	0.244558	1	0.00187592	0.0833366	0.000657591	0.83147	0.045715	0	0.02576	0.00130376	0.00125513	0.0287797	0.00801384	0	0	0	0.00173634	0.00513475	0.00269193	9.18181e-05	0.00366364	0.00871796	0.00203937	0	0.339413	0.00188754	0.00209368	0.0118974	0.00460488	0	0.0945729
57	RL	0.05	RL - 0,05	10	3	0.00237961	0.0144142	0.077098	0.213083	0	0.148892	0.00983865	0.0760739	0.0227104	0.0172793	0.512156	0.512156	0	0.316172	1	0.0075427	0.583332	0	0.521553	0.51032	0	0.587903	0.000683656	0.000504221	0.0754631	0.010011	0.000849922	0.000849922	0.00160851	0.00101699	0.00581927	0.00573555	0.00101703	0.00660601	0.0195364	0.000962999	0	0.467001	0.0232876	0.000681343	0.00961186	0.00160566	0.00102892	0.278675
58	RL	0.5	RL - 0,5	10	3	0.0373923	0.0184335	0.187838	0.430241	0.00122246	0.191922	0.0160571	0.753402	0.0409946	0.133817	0.399916	0.406166	0	0.282375	1	0.0290644	0.662684	0.000840855	0.467881	5.85362	0	0.646856	0.00154736	0.000795037	0.0760636	0.0110976	0	0	0.00135036	0.00111906	0.00551771	0.0235236	0	0.0256889	0.0205259	0.000837527	0	0.408178	0.129742	0.00160813	0.0142843	0.000872873	0	0.314341
59	Control	0	Control - 0	12	3	0.00245711	0.0102732	0.0458518	0.200257	0.0021978	0.05218	0.0198061	0.186119	0.0337446	0.0144409	0.477149	0.477481	0.00112901	0.251977	1	0.00201947	0.271648	0	0.997366	0.0308941	0	0.060708	0.000683604	0.00135666	0.00909188	0.00945427	0	0	0.00211423	0.002377	0.0058643	0.00360118	3.69488e-05	0.00476781	0.0219051	0.00206005	0	0.37289	0.00213505	0.00145944	0.0111893	0.00439484	0	0.429749
60	P80	0.05	P80 - 0,05	12	3	0.00391994	0.0528533	0.0949895	0.216243	0.00533911	0.0599074	0.0214761	0.286449	0.0661454	0.0129604	0.459003	0.453057	0	0.264243	1	0.00206137	0.090981	0.000845196	0.744301	0.135695	0	0.0209449	0.000644616	0.00162755	0.00920681	0.0091251	0	0	0.0018011	0.00183294	0.00651931	0.00203597	0	0.00360705	0.0195588	0.00170314	0	0.395799	0.00255009	0.00109268	0.0126946	0.00226246	0	0.273869
61	P80	0.5	P80 - 0,5	12	3	0.00347393	0.0264732	0.0320733	0.214	0.0039582	0.0457001	0.0158222	0.209033	0.0421868	0.0109535	0.438737	0.438737	0.00143375	0.236439	1	0.0020031	0.134663	0	0.821745	0.0634375	0	0.0292431	0.000807812	0.00167453	0.0102306	0.00671559	0	0	0	0.00156688	0.00602313	0.00259888	7.62827e-05	0.003535	0.0122007	0.00163031	0	0.355095	0.00222169	0.000843542	0.00614282	0.00355185	0	0.188025
64	RL	0.05	RL - 0,05	12	3	0.00190754	0.029605	0.466086	0.14817	0	0.134237	0.00741346	0.0453263	0.0351721	0.0136299	0.538977	0.538977	0.000812327	0.293246	1	0.0117772	0.842207	0	0.281957	0.0382633	0	0.677049	0.000981663	0.000707466	0.0563088	0.00980345	0	0	0.00112768	0	0.00505019	0.00536342	0	0.0064009	0.0197947	0.000617906	0.00119431	0.418773	0.0285481	0.00190738	0.0105965	0.000942008	0.00132958	0.532466
65	RL	0.5	RL - 0,5	12	3	0.00298703	0.0253811	0.382714	0.257484	0.000727322	0.193946	0.0139457	0.046962	0.041968	0.010515	0.403223	0.413126	0.000630532	0.257214	1	0.00829529	1.04458	0.000778419	0.340298	0.0825041	0	0.68669	0.0011662	0.00100545	0.0917169	0.0122093	0	0	0.000932908	0	0.0046006	0.0229155	0	0.0252419	0.025932	0.000915084	0.0602542	0.369969	0.138284	0.00137379	0.0156751	0.000594072	0	0.303622
66	Control	0	Control - 0	16	3	0.00230757	0.0170875	0.0408376	0.110422	0.00254746	0.0316948	0.010338	0.1068	0.0297001	0.0101016	0.45888	0.464547	0.00103491	0.211325	1	0.00122727	0.199687	0	0.702129	0.0196275	0	0.0418158	0.000768031	0.000650235	0.00997834	0.00604739	0	0	0.0011117	0.000899294	0.00467281	0.00271981	4.65852e-05	0.0036738	0.0217815	0.00122785	0	0.313145	0.00161654	0.00213992	0.00928533	0.00199324	0	0.048027
67	P80	0.05	P80 - 0,05	16	3	0.00156494	0.0315055	0.0426812	0.0489839	0.00366703	0.0197753	0.00595337	0.139516	0.0326263	0.00648999	0.0834641	0.0831582	0.000633976	0.196623	1	0.00122053	0.0940371	0	0.435717	0.0322071	0	0.0170515	0.000515945	0.000602715	0.00598745	0.00477993	0	0	0.00072007	0.00151215	0.00452455	0.00170455	0	0.00269345	0.0153384	0.00157064	0	0.29667	0.00134074	0.00148366	0.00644354	0.00280359	0.00061829	0.182189
68	P80	0.5	P80 - 0,5	16	3	0.00300004	0.0376945	0.0350462	0.517762	0.00356629	0.0294884	0.00924414	0.148144	0.0429028	0.0109879	0.521495	0.521985	0.00124788	0.639854	1	0.00171515	0.133227	0	0.576129	0.0477083	0	0.025969	0.000688101	0.000773789	0.00643742	0.00561314	0.000657751	0	0.000579063	0.00187699	0.00479101	0.00189879	0	0.0028189	0.0182815	0.00177448	0	0.930803	0.00204098	0.00119014	0.00605114	0.00466374	0.000141051	0.190712
71	RL	0.05	RL - 0,05	16	3	0.00272765	0.0423019	0.131605	0.0967452	0.00178499	0.0466861	0.0109371	0.0511208	0.0455228	0.0129224	0.374797	0.3804	0.00093682	0.202694	1	0.00478875	0.426089	0.000541993	0.312139	0.0406142	0	0.511352	0.000819115	0.000729228	0.0388558	0.00445153	0.000507083	0.000531535	0.000961944	0.000690372	0.00483782	0.00582506	4.56217e-05	0.0069061	0.022964	0.00082809	0.0059374	0.297718	0.0266802	0.00185312	0.00924092	0.000842935	0.000828327	0.0170834
72	RL	0.5	RL - 0,5	16	3	0.00286719	0.0507828	0.121887	0.846447	0.00278232	0.148839	0.0137245	0.0384804	0.0723614	0.0138921	0.363448	0.356632	0.000817612	0.209625	1	0.00413299	0.663749	0	0.267687	0.122849	0	0.595137	0.00125092	0.00105628	0.116322	0.00664984	0.000627898	0.000607885	0.000311578	0.000675112	0.00459339	0.0285875	0	0.0308101	0.0281876	0.00100007	0.183004	0.296706	0.131643	0.001453	0.0161777	0.000884235	0.000746433	0.27623
[truncated: 74 more columns]
